# Supplementary material for: Evaluation of Orbital Lymphoproliferative and Inflammatory Disorders by Gene Expression Analysis
Source: MDPI journal article supplement (doi:10.3390/ijms23158609), 2022-08-03
Supplement: s1 [file s1]

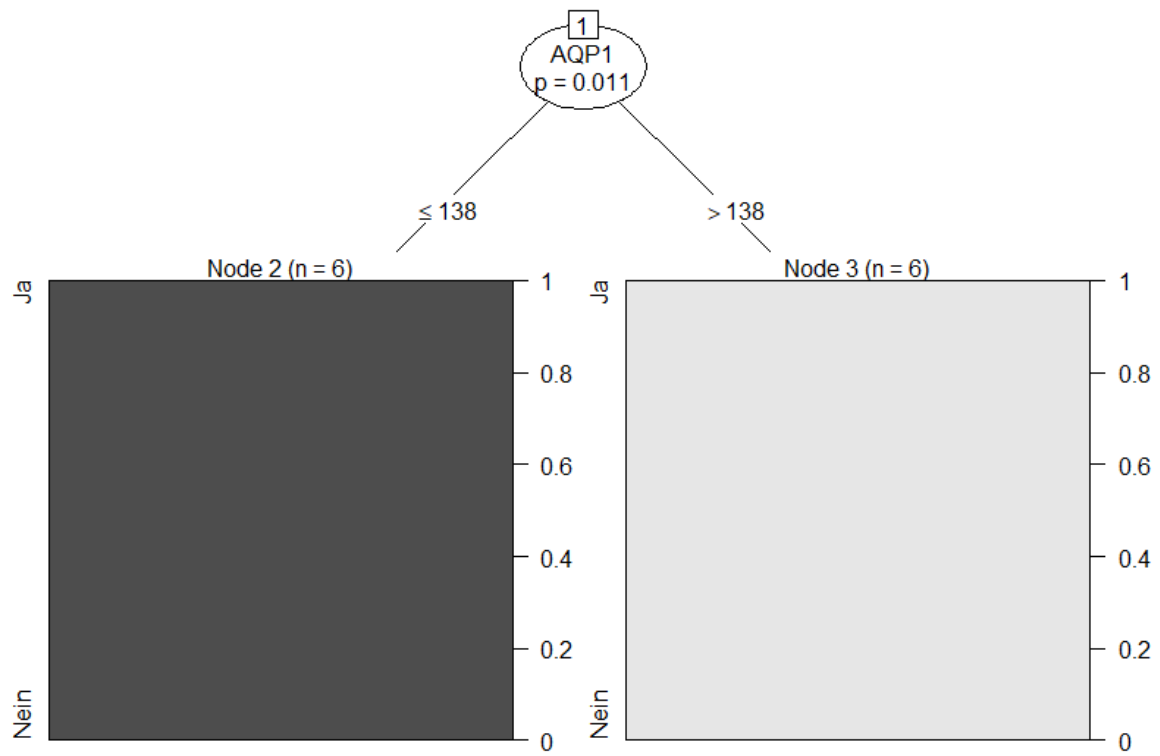

Figure S1. For NSOI, CIT revealed a one-tier system based on *AQP1* expression, with the appertaining cut-off of >138 counts identifying NSOI cases.

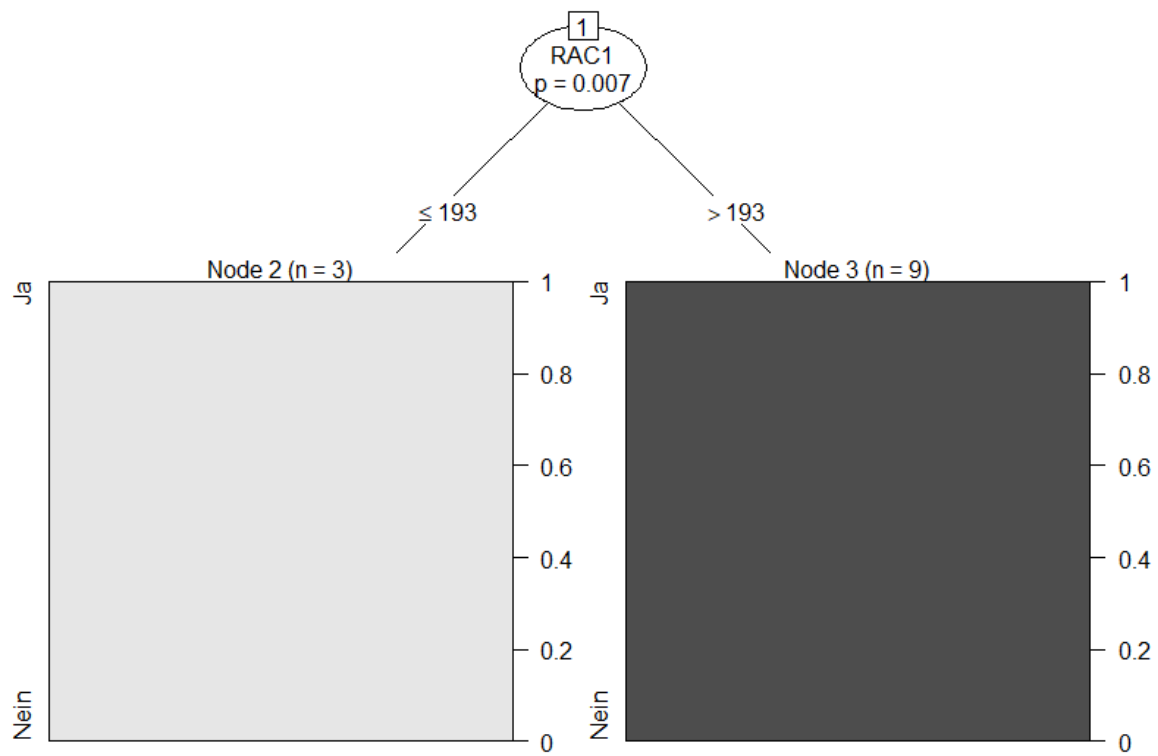

Figure S2. For lymphoma, CIT again revealed a one-tier system based on *RAC1* expression, with the appertaining cut-off of  $\leq 193$  counts identifying lymphoma cases.

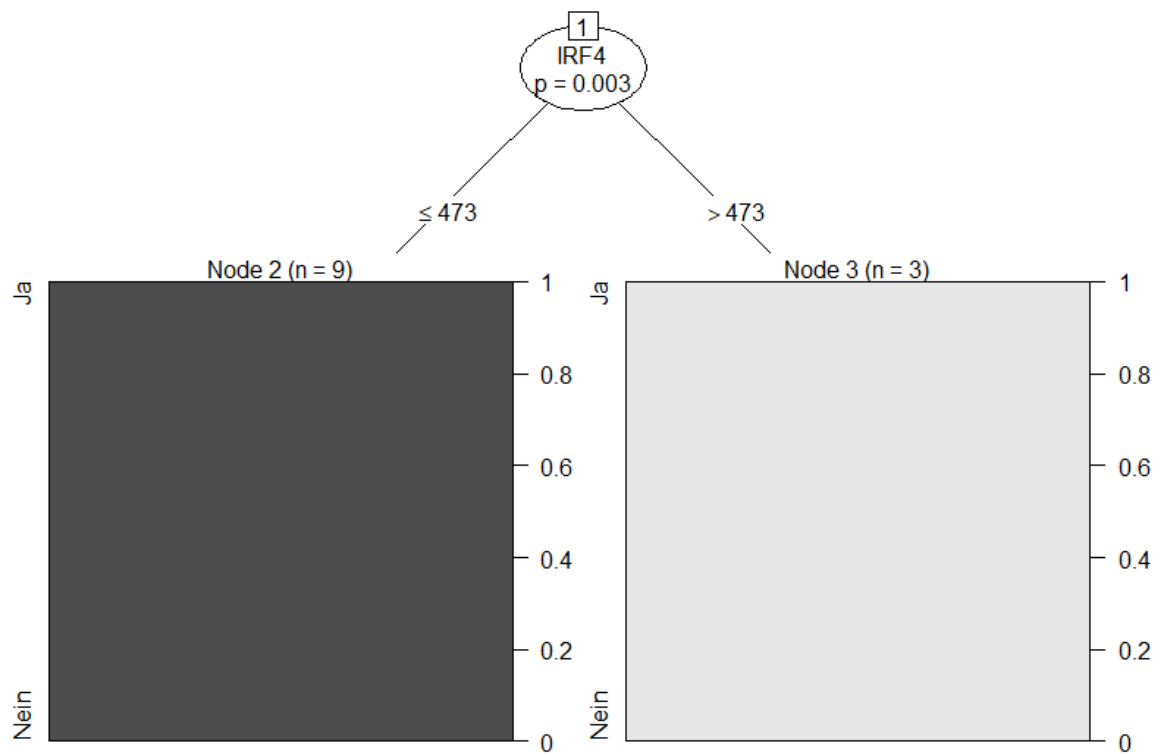

Figure S3. Also for IgG4-ROD, CIT revealed a one-tier system based on *IRF4* expression, with the appertaining cut-off of >473 counts identifying IgG4-ROD cases.
