# Supplementary material for: Evaluation of Orbital Lymphoproliferative and Inflammatory Disorders by Gene Expression Analysis
Source: Int J Mol Sci. 2022 Aug 3;23(15):8609. doi: 10.3390/ijms23158609 (PMC9369106; doi:10.3390/ijms23158609)
Supplement: Supplementary file 1 [file ijms-23-08609-s001.zip]

Archive with 5 entries (5 files):
- Figures S1, S2 and S3.pdf
- Table S1.xlsx
- Table S2.csv
- Table S3.csv
- Table S4.csv
