# Supplementary material for: Evaluation of Orbital Lymphoproliferative and Inflammatory Disorders by Gene Expression Analysis
Source: Int J Mol Sci. 2022 Aug 3;23(15):8609. doi: 10.3390/ijms23158609 (PMC9369106; doi:10.3390/ijms23158609)
Supplement: Supplementary file 1 [file ijms-23-08609-s001.zip › Table S1.xlsx]

## Sheet: Immunology Panel List
nCounter® Human Immunology V2 Panel - Gene and Probe Details
Official Symbol	Accession	Alias or Previous Symbol	Target Sequence	Official Full Name	Other targets or Isoform Information
ABCB1	NM_000927.3	PGY1, MDR1, CLCS, P-gp, CD243, GP170, ABC20	TATAGCACTAAAGTAGGAGACAAAGGAACTCAGCTCTCTGGTGGCCAGAAACAACGCATTGCCATAGCTCGTGCCCTTGTTAGACAGCCTCATATTTTGC	ATP-binding cassette, sub-family B (MDR/TAP), member 1
ABL1	NM_005157.3	ABL, JTK7, c-ABL, p150	CTGCGTGAGCTATGTGGATTCCATCCAGCAAATGAGGAACAAGTTTGCCTTCCGAGAGGCCATCAACAAACTGGAGAATAATCTCCGGGAGCTTCAGATC	c-abl oncogene 1, non-receptor tyrosine kinase
ADA	NM_000022.2		TCCAAGAAGACCATGATCTCAATAGTCAGTTACTGATGCTCCTGAACCCTATGTGTCCATTTCTGCACACACGTATACCTCGGCATGGCCGCGTCACTTC	adenosine deaminase
AHR	NM_001621.3	bHLHe76	CTGCTACCACATCCACTCTAAGCAAGGACTCTCTCAATCCTAGTTCCCTCCTGGCTGCCATGATGCAACAAGATGAGTCTATTTATCTCTATCCTGCTTC	aryl hydrocarbon receptor
AICDA	NM_020661.1	HIGM2, CDA2, ARP2, AID	GCTGCATGAAAATTCAGTTCGTCTCTCCAGACAGCTTCGGCGCATCCTTTTGCCCCTGTATGAGGTTGATGACTTACGAGACGCATTTCGTACTTTGGGA	activation-induced cytidine deaminase
AIRE	NM_000383.2	APECED, PGA1, APS1	CAGCGCCACCTCTTGTCAGTGCTCGGCTGTAAACAGCTCTGTGTTTCTGGGGACACCAGCCATCATGTGCCTGGAAATTAAACCCTGCCCCACTTCTCTA	autoimmune regulator
APP	NM_000484.3	AD1	TAAAGCATTTCGAGCATGTGCGCATGGTGGATCCCAAGAAAGCCGCTCAGATCCGGTCCCAGGTTATGACACACCTCCGTGTGATTTATGAGCGCATGAA	amyloid beta (A4) precursor protein
ARG1	NM_000045.2		AAGGAACTAAAAGGAAAGATTCCCGATGTGCCAGGATTCTCCTGGGTGACTCCCTGTATATCTGCCAAGGATATTGTGTATATTGGCTTGAGAGACGTGG	arginase, liver
ARG2	NM_001172.3		ATCAGAAAATCAAGCACGTGTGAGAATTTAGGAGACACTGTGCACTGACATGTTTCACAACAGGCATTCCAGAATTATGAGGCATTGAGGGGATAGATGA	arginase, type II
ARHGDIB	NM_001175.4	RAP1GN1, GDIA2, GDID4, Ly-GDI, RhoGDI2	ATGCATCTTTTCCCACCCTGTCACTCAACGTGGTCCCTAGAACAAGAGGCTTAAAACCGGGCTTTCACCCAACCTGCTCCCTCTGATCCTCCATCAGGGC	Rho GDP dissociation inhibitor (GDI) beta
ATG10	NM_001131028.1	APG10L, DKFZP586I0418, FLJ13954	TCAACTATATCACATCATGGCTGAGCATTGTAGGGCCAGTTGTTGGGCTGAATCTACCTCTGAGTTATGCCAAAGCAACGTCTCAGGATGAACGAAATGT	ATG10 autophagy related 10 homolog (S. cerevisiae)
ATG12	NM_004707.2	APG12L, APG12	CCGCTCCTCTCCCGAGGTCTGTAGTCGCGGAGAAACACATGTTGCGTTACTAACGTTCAGAGGTCTGCGACAGCTTCGATTTGAATGACTAGCCGGGAAC	ATG12 autophagy related 12 homolog (S. cerevisiae)
ATG16L1	NM_198890.2	APG16L, ATG16L, WDR30, FLJ10035, ATG16A	CCTTCCAAAGTCGGTTCTGGCCTAACGCATGTCCCAACACCTTGGGTTCATTTGCCCGGTGAACTCACTTTAAGCATTGGATTAACGGAAACTCCCGAAC	ATG16 autophagy related 16-like 1 (S. cerevisiae)
ATG5	NM_004849.2	APG5L, ASP, APG5, hAPG5	TGCAGTGGCTGAGTGAACATCTGAGCTACCCGGATAATTTTCTTCATATTAGTATCATCCCACAGCCAACAGATTGAAGGATCAACTATTTGCCTGAACA	ATG5 autophagy related 5 homolog (S. cerevisiae)
ATG7	NM_001136031.2	APG7L, GSA7, DKFZp434N0735	TATGATCCCTGTAACTTAGCCCAGTACCCTGGATGGCCTTTGAGGAATTTTTTGGTCCTAGCAGCCCACAGATGGAGTAGCAGTTTCCAGTCTGTTGAAG	ATG7 autophagy related 7 homolog (S. cerevisiae)
ATM	NM_000051.3	ATA, ATDC, ATC, ATD, TEL1, TELO1	ACGCTAAGTCGCTGGCCATTGGTGGACATGGCGCAGGCGCGTTTGCTCCGACGGGCCGAATGTTTTGGGGCAGTGTTTTGAGCGCGGAGACCGCGTGATA	ataxia telangiectasia mutated
B2M	NM_004048.2		TACTGAAGAATGGAGAGAGAATTGAAAAAGTGGAGCATTCAGACTTGTCTTTCAGCAAGGACTGGTCTTTCTATCTCTTGTACTACACTGAATTCACCCC	beta-2-microglobulin
B3GAT1	NM_018644.3	CD57, LEU7, GlcAT-P, HNK-1, NK-1	GAGGGAGGCCTGAGCACACTGCTTTGGAAATTATTCTAAACACAAAAAAGGGAAAGAAAATGTTATTTCTCCCTAAGTCAGGAGCATGCAGAGCTAGCCC	beta-1,3-glucuronyltransferase 1 (glucuronosyltransferase P)
BATF	NM_006399.3	B-ATF, SFA-2, BATF1	CCTGGCAAACAGGACTCATCTGATGATGTGAGAAGAGTTCAGAGGAGGGAGAAAAATCGTATTGCCGCCCAGAAGAGCCGACAGAGGCAGACACAGAAGG	basic leucine zipper transcription factor, ATF-like
BATF3	NM_018664.2	JUNDM1, SNFT, JDP1	ACATCCAACAGGCGCCAAACTCACAGAGCCCTTGTGCAGATCCAGCATGGAGGCCACCCTCAGGAGTGACTTCTCATCCACCCTGGCAGCTAGTAGGTTC	basic leucine zipper transcription factor, ATF-like 3
BAX	NM_138761.3	BCL2L4	TTTTTCCGAGTGGCAGCTGACATGTTTTCTGACGGCAACTTCAACTGGGGCCGGGTTGTCGCCCTTTTCTACTTTGCCAGCAAACTGGTGCTCAAGGCCC	BCL2-associated X protein
BCAP31	NM_005745.7	DXS1357E, BAP31, 6C6-Ag, CDM	AGCACTTCCACATGAAGCTTTTCCGTGCCCAGAGGAATCTCTACATTGCTGGCTTTTCCTTGCTGCTGTCCTTCCTGCTTAGACGCCTGGTGACTCTCAT	B-cell receptor-associated protein 31
BCL10	NM_003921.2	CARMEN, CIPER, mE10, c-E10, CLAP	TGAAAATACCATCTTCTCTTCAACTACACTTCCCAGACCTGGGGACCCAGGGGCTCCTCCTTTGCCACCAGATCTACAGTTAGAAGAAGAAGGAACTTGT	B-cell CLL/lymphoma 10
BCL2	NM_000657.2	Bcl-2	AGTTCGGTGGGGTCATGTGTGTGGAGAGCGTCAACCGGGAGATGTCGCCCCTGGTGGACAACATCGCCCTGTGGATGACTGAGTACCTGAACCGGCACCT	B-cell CLL/lymphoma 2
BCL2L11	NM_138621.4	BOD, BimL, BimEL, BIM	CGGACTGAGAAACGCAAGAAAAAAAGACCAAATGGCAAAGCAACCTTCTGATGTAAGTTCTGAGTGTGACCGAGAAGGTAGACAATTGCAGCCTGCGGAG	BCL2-like 11 (apoptosis facilitator)
BCL3	NM_005178.2	D19S37, BCL4	AGGGTAACCTGCCAGCTGTGCACCGGCTGGTCAACCTCTTCCAGCAGGGGGGCCGGGAGCTCGACATCTACAACAACCTACGGCAGACACCGCTCCACCT	B-cell CLL/lymphoma 3
BCL6	NM_001706.2	ZNF51, ZBTB27, LAZ3, BCL5, BCL6A	GTTGTGGACACTTGCCGGAAGTTTATTAAGGCCAGTGAAGCAGAGATGGTTTCTGCCATCAAGCCTCCTCGTGAAGAGTTCCTCAACAGCCGGATGCTGA	B-cell CLL/lymphoma 6
BID	NM_001196.2		AAGCACGACAGTGGATGCTGGGTCCATATCACACACATTGCTGTGAACAGGAAACTCCTGTGACCACAACATGAGGCCACTGGAGACGCATATGAGTAAG	BH3 interacting domain death agonist
BLNK	NM_013314.2	SLP65, Ly57, SLP-65, BLNK-s	ACACCACTGAAGACAACTCCAGTTGCCTCTCAACAGAATGCTTCAAGTGTTTGTGAAGAAAAACCTATACCTGCTGAACGCCACCGAGGGTCAAGTCACA	B-cell linker
BST1	NM_004334.2	CD157	GAAAAGGGCATCCATCCAGTATTCCAAGGATAGTTCTGGGGTGATCCACGTCATGCTGAATGGTTCAGAGCCAACAGGAGCCTATCCCATCAAAGGTTTT	bone marrow stromal cell antigen 1
BST2	NM_004335.2	CD317, tetherin	GAAGCTGGCACATCTTGGAAGGTCCGTCCTGCTCGGCTTTTCGCTTGAACATTCCCTTGATCTCATCAGTTCTGAGCGGGTCATGGGGCAACACGGTTAG	bone marrow stromal cell antigen 2
BTK	NM_000061.1	AGMX1, IMD1, ATK, XLA, PSCTK1	TGATCTGGTTCAGAAATATCACCCTTGCTTCTGGATCGATGGGCAGTATCTCTGCTGCTCTCAGACAGCCAAAAATGCTATGGGCTGCCAAATTTTGGAG	Bruton agammaglobulinemia tyrosine kinase
BTLA	NM_181780.2	BTLA1, CD272	ACACTCCATCTTAGCAGGAGATCCCTTTGAACTAGAATGCCCTGTGAAATACTGTGCTAACAGGCCTCATGTGACTTGGTGCAAGCTCAATGGAACAACA	B and T lymphocyte associated
C14orf166	NM_016039.2	CGI-99, RLLM1, RTRAF	CTTCATCGTTTGGCTTGAAGACCAGAAAATCAGGCACTACAAGATTGAAGACAGAGGGAATTTAAGAAACATCCACAGCAGCGACTGGCCCAAGTTCTTT	chromosome 14 open reading frame 166
C1QA	NM_015991.2		GGTGACCAGGTCTGGGTTGAAAAAGACCCCAAAAAGGGTCACATTTACCAGGGCTCTGAGGCCGACAGCGTCTTCAGCGGCTTCCTCATCTTCCCATCTG	complement component 1, q subcomponent, A chain
C1QB	NM_000491.3		AACTCACTACTGGGCATGGAGGGTGCCAACAGCATCTTTTCCGGGTTCCTGCTCTTTCCAGATATGGAGGCCTGACCTGTGGGCTGCTTCACATCCACCC	complement component 1, q subcomponent, B chain
C1QBP	NM_001212.3	HABP1, gC1Q-R, gC1qR, p32, SF2p32	ATTATACACTCAACACAGATTCCTTGGACTGGGCCTTATATGACCACCTAATGGATTTCCTTGCCGACCGAGGGGTGGACAACACTTTTGCAGATGAGCT	complement component 1, q subcomponent binding protein
C1R	NM_001733.4		CAAGTTCCTGGAGCCTTTTGATATTGATGACCACCAGCAAGTACACTGCCCCTATGACCAGCTACAGATCTATGCCAACGGGAAGAACATTGGCGAGTTC	complement component 1, r subcomponent
C1S	NM_001734.2		ACTGCACTGATTGGGGAGATTGCAAGTCCCAATTATCCCAAACCATATCCAGAGAACTCAAGGTGTGAATACCAGATCCGGTTGGAGAAAGGGTTCCAAG	complement component 1, s subcomponent
C2	NM_000063.3		ATCTCATGATGAACAACCAAATGCGACTCCTCGGCATGGAAACGATGGCCTGGCAGGAAATCCGACATGCCATCATCCTTCTGACAGATGGAAAGTCCAA	complement component 2
C3	NM_000064.2	CPAMD1	CATCTACCTGGACAAGGTCTCACACTCTGAGGATGACTGTCTAGCTTTCAAAGTTCACCAATACTTTAATGTAGAGCTTATCCAGCCTGGAGCAGTCAAG	complement component 3
C4A/B	NM_007293.2	CPAMD2, C4S, CO4, C4, C4A3, C4A2, C4A4, C4A6, C4B, RG/CPAMD3, C4F, CO4, C4B1, C4B3, CH	GGTCCGTGAGATGTCAGGCTCCCCAGCTTCTGGCATTCCTGTCAAAGTTTCTGCCACGGTGTCTTCTCCTGGGTCTGTTCCTGAAGTCCAGGACATTCAG	complement component 4A (Rodgers blood group)/complement component 4B (Chido blood group)	LOC110384692 (NM_001352000), C4B_2 (NM_001242823)
C4BPA	NM_000715.3	C4BP	CTCTCCCACAATGTGAAATTGTCAAGTGTAAGCCTCCTCCAGACATCAGGAATGGAAGGCACAGCGGTGAAGAAAATTTCTACGCATACGGCTTTTCTGT	complement component 4 binding protein, alpha
C5	NM_001735.2	CPAMD4	TTCTGTGTTAAAATGTCTGCTGTGGAGGGAATCTGCACTTCGGAAAGCCCAGTCATTGATCATCAGGGCACAAAGTCCTCCAAATGTGTGCGCCAGAAAG	complement component 5
C6	NM_000065.2		ACTCTCCTGTTTGGGCATGTCTTATTCAGTTCCAGCTCATGACGCCCTGTAGCATACCCCTAGGTACCAACTTCCACAGCAGTCTCGTAAATTCTCCTGT	complement component 6
C7	NM_000587.2		ATGCTTTTGAAACACAGTCCTGTGAACCTACAAGAGGATGTCCAACAGAGGAGGGATGTGGAGAGCGTTTCAGGTGCTTTTCAGGTCAGTGCATCAGCAA	complement component 7
C8A	NM_000562.2		GAGCTTCGATATGACTCCACCTGTGAACGTCTCTACTATGGAGATGATGAGAAATACTTTCGGAAACCCTACAACTTTCTGAAGTACCACTTTGAAGCCC	complement component 8, alpha polypeptide
C8B	NM_000066.2		GTTTTGAGGGCCCAGTTCTTGATCACAGGTATTATGCAGGTGGATGCTCCCCGCATTACATCCTGAACACGAGGTTTAGGAAGCCCTACAATGTGGAAAG	complement component 8, beta polypeptide
C8G	NM_000606.2		CTTCCTGCTTCAAGCCCGAGACGCCCGAGGGGCTGTGCACGTGGTTGTCGCTGAGACCGACTACCAGAGTTTCGCTGTCCTGTACCTGGAGCGGGCGGGG	complement component 8, gamma polypeptide
C9	NM_001737.3		TTTGACAATGAGTTCTACAATGGACTCTGTAACCGGGATCGGGATGGAAACACTCTGACATACTACCGAAGACCTTGGAACGTGGCTTCTTTGATCTATG	complement component 9
CAMP	NM_004345.3	CAP18, FALL39, FALL-39, LL37	CATCATTGCCCAGGTCCTCAGCTACAAGGAAGCTGTGCTTCGTGCTATAGATGGCATCAACCAGCGGTCCTCGGATGCTAACCTCTACCGCCTCCTGGAC	cathelicidin antimicrobial peptide
CARD9	NM_052813.4		TGCCTTGCCGGCGGGGGGAGCCCGAAACAGCCCTTTGCAGCTCTGCACCAGGAGCAGGTTTTGCGGAACCCCCATGACGCAGGCCTGAGCAGCGGGGAGC	caspase recruitment domain family, member 9
CASP1	NM_001223.3	IL1BC, ICE	TGGAGACATCCCACAATGGGCTCTGTTTTTATTGGAAGACTCATTGAACATATGCAAGAATATGCCTGTTCCTGTGATGTGGAGGAAATTTTCCGCAAGG	caspase 1, apoptosis-related cysteine peptidase (interleukin 1, beta, convertase)
CASP10	NM_032977.3	MCH4	GAAAGCCTGAAGCACTTTGTGGCTTCCACGGGTTCGTTTCTAGGAAGCTTTTGCTTTACCTGGGGAAACCCCAAGCTCTACAGTGAGAAAGTTGTAAATT	caspase 10, apoptosis-related cysteine peptidase
CASP2	NM_032982.2	NEDD2, ICH1	AGAGCCAGCCTTGGTTGGACCTATTGCCAGGAATGTTTCAGCTGCAGTTGAAGAGCCTGACAAGTGAAGTTGTAAACACAGTGTGGTTATGGGGAGAGGG	caspase 2, apoptosis-related cysteine peptidase
CASP3	NM_032991.2	CPP32, CPP32B, Yama, apopain	ACTCCACAGCACCTGGTTATTATTCTTGGCGAAATTCAAAGGATGGCTCCTGGTTCATCCAGTCGCTTTGTGCCATGCTGAAACAGTATGCCGACAAGCT	caspase 3, apoptosis-related cysteine peptidase
CASP8	NM_001228.4	MCH5, MACH, FLICE, Casp-8	AGATGGACTTCAGCAGAAATCTTTATGATATTGGGGAACAACTGGACAGTGAAGATCTGGCCTCCCTCAAGTTCCTGAGCCTGGACTACATTCCGCAAAG	caspase 8, apoptosis-related cysteine peptidase
CCBP2	NM_001296.3	ACKR2, CMKBR9, CCR10, D6, CCR9	GAACAGATGGGAACCAGCTCAATTGGGTGTCCACTCAAAGTGCTCTCTCCAGGGGCCTCAGTGACTGTGTTGCTAAACCCAGTGGTCAGTTCTCAGTTCT	chemokine binding protein 2
CCL11	NM_002986.2	SCYA11, eotaxin, MGC22554	TGGGTGCAGGATTCCATGAAGTATCTGGACCAAAAATCTCCAACTCCAAAGCCATAAATAATCACCATTTTTGAAACCAAACCAGAGCCTGAGTGTTGCC	chemokine (C-C motif) ligand 11
CCL13	NM_005408.2	SCYA13, MCP-4, NCC-1, SCYL1, CKb10, MGC17134	CCAGAATTATATGAAACACCTGGGCCGGAAAGCTCACACCCTGAAGACTTGAACTCTGCTACCCCTACTGAAATCAAGCTGGAGTACGTGAAATGACTTT	chemokine (C-C motif) ligand 13
CCL15	NM_032965.3	HCC-2, NCC-3, SCYL3, MIP-5, Lkn-1, MIP-1d, HMRP-2B	TGCTAACACCTCCTGGTTGGAACTACAGGAATAGAACTGGAAAGGGAAAAAAGGCAGCATTCACCACATCCCAATCCTGAATCCAAGAGTCTAAGATAGT	chemokine (C-C motif) ligand 15
CCL16	NM_004590.2	SCYA16, NCC-4, SCYL4, LEC, HCC-4, LMC, LCC-1, CKb12, Mtn-1	TTGTCCACGGTTAAAATTATTACAGCAAAGAATGGTCAACCCCAGCTCCTCAACTCCCAGTGATGACCAGGCTTTAGTGGAAGCCCTTGTTTACAGAAGA	chemokine (C-C motif) ligand 16
CCL18	NM_002988.2	SCYA18, DC-CK1, PARC, AMAC-1, DCCK1, MIP-4, CKb7	CCCCTTTCCCTTCAACTCTTCGTACATTCAATGCATGGATCAATCAGTGTGATTAGCTTTCTCAGCAGACATTGTGCCATATGTATCAAATGACAAATCT	chemokine (C-C motif) ligand 18 (pulmonary and activation-regulated)
CCL19	NM_006274.2	SCYA19, ELC, MIP-3b, exodus-3, CKb11	GACCTCAGCCAAGATGAAGCGCCGCAGCAGTTAACCTATGACCGTGCAGAGGGAGCCCGGAGTCCGAGTCAAGCATTGTGAATTATTACCTAACCTGGGG	chemokine (C-C motif) ligand 19
CCL2	NM_002982.3	SCYA2, MCP1, MCP-1, MCAF, SMC-CF, GDCF-2, HC11, MGC9434	CATTCCCCAAGGGCTCGCTCAGCCAGATGCAATCAATGCCCCAGTCACCTGCTGTTATAACTTCACCAATAGGAAGATCTCAGTGCAGAGGCTCGCGAGC	chemokine (C-C motif) ligand 2
CCL20	NM_004591.1	SCYA20, LARC, MIP-3a, exodus-1, ST38, CKb4	ATCTGTTCTTTGAGCTAAAAACCATGTGCTGTACCAAGAGTTTGCTCCTGGCTGCTTTGATGTCAGTGCTGCTACTCCACCTCTGCGGCGAATCAGAAGC	chemokine (C-C motif) ligand 20
CCL22	NM_002990.3	SCYA22, MDC, STCP-1, ABCD-1, DC/B-CK, A-152E5.1, MGC34554	CTCGCCCAAGCAGCTGGTAATTCCATTTCATGTATTAGATGTCCCCTGGCCCTCTGTCCCCTCTTAATAACCCTAGTCACAGTCTCCGCAGATTCTTGGG	chemokine (C-C motif) ligand 22
CCL23	NM_145898.1	SCYA23, Ckb-8, MPIF-1, MIP-3, CKb8	AGGGGCGACGTTTCTGTGCCAACCCCAGTGATAAGCAAGTTCAGGTTTGCGTGAGAATGCTGAAGCTGGACACACGGATCAAGACCAGGAAGAATTGAAC	chemokine (C-C motif) ligand 23
CCL24	NM_002991.2	SCYA24, Ckb-6, MPIF-2, eotaxin-2, MPIF2	ATAGTAACCAGCCTTCTGTTCCTTGGTGTCTGTGCCCACCACATCATCCCTACGGGCTCTGTGGTCATCCCCTCTCCCTGCTGCATGTTCTTTGTTTCCA	chemokine (C-C motif) ligand 24
CCL26	NM_006072.4	SCYA26, MIP-4alpha, eotaxin-3, IMAC, MIP-4a, TSC-1	GGAGTGACATATCCAAGACCTGCTGCTTCCAATACAGCCACAAGCCCCTTCCCTGGACCTGGGTGCGAAGCTATGAATTCACCAGTAACAGCTGCTCCCA	chemokine (C-C motif) ligand 26
CCL3	NM_002983.2	G0S19-1, LD78ALPHA, MIP-1-alpha	CAGTTCTCTGCATCACTTGCTGCTGACACGCCGACCGCCTGCTGCTTCAGCTACACCTCCCGGCAGATTCCACAGAATTTCATAGCTGACTACTTTGAGA	chemokine (C-C motif) ligand 3
CCL4	NM_002984.2	MIP-1-beta, Act-2, AT744.1	TTCTGCAGCCTCACCTCTGAGAAAACCTCTTTGCCACCAATACCATGAAGCTCTGCGTGACTGTCCTGTCTCTCCTCATGCTAGTAGCTGCCTTCTGCTC	chemokine (C-C motif) ligand 4	CCL4L1 (NM_207007), CCL4L2 (NM_001291474;NM_001291471;NM_001291475;NM_001291469;NM_001291472;NM_001291468;NM_001291473;NM_001291470)
CCL5	NM_002985.2	D17S136E, SCYA5, RANTES, SISd, TCP228, MGC17164	AGTGTGTGCCAACCCAGAGAAGAAATGGGTTCGGGAGTACATCAACTCTTTGGAGATGAGCTAGGATGGAGAGTCCTTGAACCTGAACTTACACAAATTT	chemokine (C-C motif) ligand 5
CCL7	NM_006273.2	SCYA6, SCYA7, MCP-3, NC28, FIC, MARC, MCP3	CAGCCCCCAGGGGCTTGCTCAGCCAGTTGGGATTAATACTTCAACTACCTGCTGCTACAGATTTATCAATAAGAAAATCCCTAAGCAGAGGCTGGAGAGC	chemokine (C-C motif) ligand 7
CCL8	NM_005623.2	SCYA8, MCP-2, HC14	AAGGAGAGATGGGTCAGGGATTCCATGAAGCATCTGGACCAAATATTTCAAAATCTGAAGCCATGAGCCTTCATACATGGACTGAGAGTCAGAGCTTGAA	chemokine (C-C motif) ligand 8
CCND3	NM_001760.2		GGCCAGCCATGTCTGCATTTCGGTGGCTAGTCAAGCTCCTCCTCCCTGCATCTGACCAGCAGCGCCTTTCCCAACTCTAGCTGGGGGTGGGCCAGGCTGA	cyclin D3
CCR1	NM_001295.2	SCYAR1, CMKBR1, CKR-1, MIP1aR, CD191	CATCATTTGGGCCCTGGCCATCTTGGCTTCCATGCCAGGCTTATACTTTTCCAAGACCCAATGGGAATTCACTCACCACACCTGCAGCCTTCACTTTCCT	chemokine (C-C motif) receptor 1
CCR10	NM_016602.2	GPR2	GAGCTGCCCTGCCAGCAAACGCAAGGATGTCGCACTGCTGGTGACCAGCGGCTTGGCCCTCGCCCGCTGTGGCCTCAATCCCGTTCTCTACGCCTTCCTG	chemokine (C-C motif) receptor 10
CCR2	NM_001123041.2	CMKBR2, CC-CKR-2, CKR2, MCP-1-R, CD192, FLJ78302	TCTGATCTGCTTTTTCTTATTACTCTCCCATTGTGGGCTCACTCTGCTGCAAATGAGTGGGTCTTTGGGAATGCAATGTGCAAATTATTCACAGGGCTGT	chemokine (C-C motif) receptor 2
CCR5	NM_000579.1	CMKBR5, CKR-5, CC-CKR-5, CKR5, CD195, IDDM22	TAGGAACATACTTCAGCTCACACATGAGATCTAGGTGAGGATTGATTACCTAGTAGTCATTTCATGGGTTGTTGGGAGGATTCTATGAGGCAACCACAGG	chemokine (C-C motif) receptor 5
CCR6	NM_031409.2	STRL22, CKR-L3, GPR-CY4, CMKBR6, GPR29, DRY-6, DCR2, BN-1, CD196	CTTTAACTGCGGGATGCTGCTCCTGACTTGCATTAGCATGGACCGGTACATCGCCATTGTACAGGCGACTAAGTCATTCCGGCTCCGATCCAGAACACTA	chemokine (C-C motif) receptor 6
CCR7	NM_001838.2	CMKBR7, EBI1, BLR2, CDw197, CD197	TTCCGAAAACCAGGCCTTATCTCCAAGACCAGAGATAGTGGGGAGACTTCTTGGCTTGGTGAGGAAAAGCGGACATCAGCTGGTCAAACAAACTCTCTGA	chemokine (C-C motif) receptor 7
CCR8	NM_005201.2	CMKBRL2, CMKBR8, CY6, TER1, CKR-L1, GPR-CY6, CDw198	TTGCCTCCTGTTTGTATTCAGTCTTCTGGGAAACAGCCTGGTCATCCTGGTCCTTGTGGTCTGCAAGAAGCTGAGGAGCATCACAGATGTATACCTCTTG	chemokine (C-C motif) receptor 8
CCRL1	NM_016557.2	ACKR4, CCR11, CCBP2, VSHK1, CCX-CKR, PPR1	ATTGTCAAGTTCTGCCGAGCCATAGACATCATCTACTCCCTGATCACCAGCTGCAACATGAGCAAACGCATGGACATCGCCATCCAAGTCACAGAAAGCA	chemokine (C-C motif) receptor-like 1
CCRL2	NM_003965.4	HCR, CRAM-B, CKRX, CRAM-A	TACAATCTGGACAAAAGTGTTCACATCACTAAACTCATCGCCACCACCCACTGCTGCATCAACCCTCTCCTGTATGCGTTTCTTGATGGGACATTTAGCA	chemokine (C-C motif) receptor-like 2
CD14	NM_000591.2		GCCCAAGCACACTCGCCTGCCTTTTCCTGCGAACAGGTTCGCGCCTTCCCGGCCCTTACCAGCCTAGACCTGTCTGACAATCCTGGACTGGGCGAACGCG	CD14 molecule
CD160	NM_007053.2	BY55, NK1, NK28	TTGATGTTCACCATAAGCCAAGTCACACCGTTGCACAGTGGGACCTACCAGTGTTGTGCCAGAAGCCAGAAGTCAGGTATCCGCCTTCAGGGCCATTTTT	CD160 molecule
CD163	NM_004244.4	M130, MM130	CATCTGTGATTCGGACTTCTCTCTGGAAGCTGCCAGCGTTCTATGCAGGGAATTACAGTGTGGCACAGTTGTCTCTATCCTGGGGGGAGCTCACTTTGGA	CD163 molecule
CD164	NM_006016.4	MUC-24, MGC-24	GATTAATTCGAAAATAGGCAGAATTCCATTCCTCCCAAGGTGGCAAAAATTAGCTATACTGATGTAATTGTCATTTACCTGGGTATGAATTCCCTGACAC	CD164 molecule, sialomucin
CD19	NM_001770.4		AGATTCACACCTGACTCTGAAATCTGAAGACCTCGAGCAGATGATGCCAACCTCTGGAGCAATGTTGCTTAGGATGTGTGCATGTGTGTAAGTGTGTGTG	CD19 molecule
CD1A	NM_001763.2	CD1	CCTGTTTTAGATATCCCTTACTCCAGAGGGCCTTCCCTGACTTACAAGTGGGAAGCAGTCTCTTCCTGGTCTGAACTCCCGCCACATTTTAGCCGTACTT	CD1a molecule
CD1D	NM_001766.3		GGCGTGCTTGCTGTTCCTCCTCATTGTGGGCTTTACCTCCCGGTTTAAGAGGCAAACTTCCTATCAGGGCGTCCTGTGACTCGCCTTGCCACATCTGTGT	CD1d molecule
CD2	NM_001767.3	SRBC	GCAGCCTCTTGATGGTCTTTGTGGCACTGCTCGTTTTCTATATCACCAAAAGGAAAAAACAGAGGAGTCGGAGAAATGATGAGGAGCTGGAGACAAGAGC	CD2 molecule
CD209	NM_021155.2	DC-SIGN, CDSIGN, DC-SIGN1, CLEC4L	TTATCTCATACATGCAAACCTACCATCTGTTCAACTTCCACCTACCACCTCCTGCACCCCTTTGATCGGGGACTTACTGGTTGCAAGAGCTCATTTTGCA	CD209 molecule
CD22	NM_001771.2	SIGLEC-2, SIGLEC2	TTTTCCAGAAGATGAGGGGATTCATTACTCAGAGCTGATCCAGTTTGGGGTCGGGGAGCGGCCTCAGGCACAAGAAAATGTGGACTATGTGATCCTCAAA	CD22 molecule
CD24	NM_013230.2	CD24A	ACCGACGGAGGGGACATGGGCAGAGCAATGGTGGCCAGGCTCGGGCTGGGGCTGCTGCTGCTGGCACTGCTCCTACCCACGCAGATTTATTCCAGTGAAA	CD24 molecule
CD244	NM_016382.2	2B4, NAIL, NKR2B4, Nmrk, SLAMF4	AAGAGGAACCACAGCCCTTCCTTCAATAGCACTATCTATGAAGTGATTGGAAAGAGTCAACCTAAAGCCCAGAACCCTGCTCGATTGAGCCGCAAAGAGC	CD244 molecule, natural killer cell receptor 2B4
CD247	NM_198053.1	CD3Z, CD3H, CD3Q	TGGCAGGACAGGAAAAACCCGTCAATGTACTAGGATACTGCTGCGTCATTACAGGGCACAGGCCATGGATGGAAAACGCTCTCTGCTCTGCTTTTTTTCT	CD247 molecule
CD27	NM_001242.4	TNFRSF7, S152, Tp55	CCAGATGTGTGAGCCAGGAACATTCCTCGTGAAGGACTGTGACCAGCATAGAAAGGCTGCTCAGTGTGATCCTTGCATACCGGGGGTCTCCTTCTCTCCT	CD27 molecule
CD274	NM_014143.3	PDCD1LG1, B7-H, B7H1, PD-L1, PDL1, B7-H1	GGATACTTCTGAACAAGGAGCCTCCAAGCAAATCATCCATTGCTCATCCTAGGAAGACGGGTTGAGAATCCCTAATTTGAGGGTCAGTTCCTGCAGAAGT	CD274 molecule
CD276	NM_001024736.1	B7-H3, B7H3	ACATTTCTTAGGGACACAGTACACTGACCACATCACCACCCTCTTCTTCCAGTGCTGCGTGGACCATCTGGCTGCCTTTTTTCTCCAAAAGATGCAATAT	CD276 molecule
CD28	NM_001243078.1		GCTGCTCCTGTACCTTGGAGGTCCATTCACATGGGAAAGTATTTTGGAATGTGTCTTTTGAAGAGAGCATCAGAGTTCTTAAGGGACTGGGTAAGGCCTG	CD28 molecule
CD34	NM_001025109.1		AGGTAAACTCCTGTCCTTTACACATTCGGCTCCCTGGAGCCAGACTCTGGTCTTCTTTGGGTAAACGTGTGACGGGGGAAAGCCAAGGTCTGGAGAAGCT	CD34 molecule
CD36	NM_001001548.2	SCARB3, GPIV, FAT, GP4, GP3B	CTAGCCAAGGAAAATGTAACCCAGGACGCTGAGGACAACACAGTCTCTTTCCTGCAGCCCAATGGTGCCATCTTCGAACCTTCACTATCAGTTGGAACAG	CD36 molecule (thrombospondin receptor)
CD3D	NM_000732.4	T3D	TATCTACTGGATGAGTTCCGCTGGGAGATGGAACATAGCACGTTTCTCTCTGGCCTGGTACTGGCTACCCTTCTCTCGCAAGTGAGCCCCTTCAAGATAC	CD3d molecule, delta (CD3-TCR complex)
CD3E	NM_000733.2		AAGTAACAGTCCCATGAAACAAAGATGCAGTCGGGCACTCACTGGAGAGTTCTGGGCCTCTGCCTCTTATCAGTTGGCGTTTGGGGGCAAGATGGTAATG	CD3e molecule, epsilon (CD3-TCR complex)
CD3EAP	NM_012099.1	POLR1G, ASE-1, CAST, PAF49	CAGCCTCAGAGTCCCCTCGTTTCTCCTTGGAGGCGCTGACGGGTCCAGATACGGAGCTGTGGCTTATTCAGGCCCCTGCAGACTTTGCCCCAGAATGCTT	CD3e molecule, epsilon associated protein
CD4	NM_000616.4		TGGCAGGCGGAGAGGGCTTCCTCCTCCAAGTCTTGGATCACCTTTGACCTGAAGAACAAGGAAGTGTCTGTAAAACGGGTTACCCAGGACCCTAAGCTCC	CD4 molecule
CD40	NM_001250.4	TNFRSF5, p50, Bp50	CCCAGGAAGCCATATACACAGATGCCCATTGCAGCATTGTTTGTGATAGTGAACAACTGGAAGCTGCTTAACTGTCCATCAGCAGGAGACTGGCTAAATA	CD40 molecule, TNF receptor superfamily member 5
CD40LG	NM_000074.2	HIGM1, IMD3, TNFSF5, CD40L, TRAP, gp39, hCD40L, CD154	GCATTTGATTTATCAGTGAAGATGCAGAAGGGAAATGGGGAGCCTCAGCTCACATTCAGTTATGGTTGACTCTGGGTTCCTATGGCCTTGTTGGAGGGGG	CD40 ligand
CD44	NM_001001392.1	MIC4, MDU2, MDU3, IN, MC56, Pgp1, CD44R, HCELL, CSPG8	ACACCATGGACAAGTTTTGGTGGCACGCAGCCTGGGGACTCTGCCTCGTGCCGCTGAGCCTGGCGCAGATCGATTTGAATATAACCTGCCGCTTTGCAGG	CD44 molecule (Indian blood group)
CD46	NM_172350.1	MIC10, MCP, TRA2.10, MGC26544, TLX	TATACCTCCTCTTGCCACCCATACTATTTGTGATCGGAATCATACATGGCTACCTGTCTCAGATGACGCCTGTTATAGAGAAACATGTCCATATATACGG	CD46 molecule, complement regulatory protein
CD48	NM_001778.2	BCM1, BLAST, mCD48, hCD48, SLAMF2	AATTTAAAGGCAGGGTCAGACTTGATCCTCAGAGTGGCGCACTGTACATCTCTAAGGTCCAGAAAGAGGACAACAGCACCTACATCATGAGGGTGTTGAA	CD48 molecule
CD5	NM_014207.2	LEU1, T1	CCAGAAGAAGCAGCGCCAGTGGATTGGCCCAACGGGAATGAACCAAAACATGTCTTTCCATCGCAACCACACGGCAACCGTCCGATCCCATGCTGAGAAC	CD5 molecule
CD53	NM_001040033.1	MOX44, TSPAN25	CAGTAGTCCTGTGGTGAAGAGACTTGTTTCATCTCCGGAAATGCAAAACCATTTATAGCATGAAGCCCTACATGATCACTGCAGGATGATCCTCCTCCCA	CD53 molecule
CD55	NM_000574.3	DAF, CR, TC, CROM	CCCTACTCCACCCGTCTTGTTTGTCCCACCCTTGGTGACGCAGAGCCCCAGCCCAGACCCCGCCCAAAGCACTCATTTAACTGGTATTGCGGAGCCACGA	CD55 molecule, decay accelerating factor for complement (Cromer blood group)
CD58	NM_001779.2	LFA3	GTGCTTGAGTCTCTTCCATCTCCCACACTAACTTGTGCATTGACTAATGGAAGCATTGAAGTCCAATGCATGATACCAGAGCATTACAACAGCCATCGAG	CD58 molecule
CD59	NM_000611.4	MIC11, MIN1, MSK21, MIN2, MIN3, 16.3A5, EJ16, EJ30, EL32, G344, p18-20	GACTTGAACTAGATTGCATGCTTCCTCCTTTGCTCTTGGGAAGACCAGCTTTGCAGTGACAGCTTGAGTGGGTTCTCTGCAGCCCTCAGATTATTTTTCC	CD59 molecule, complement regulatory protein
CD6	NM_006725.3	Tp120	CGCTGGCAGCCAGGGTCCTCTGCTCAGCTTCCCGGAGTTTGCACAATCTGTCCACTCCCGAAGTCCCTGCAAGTGTTCAGACAGTCACTATAGAATCTTC	CD6 molecule
CD7	NM_006137.6	GP40, LEU-9, TP41, Tp40	CCTACACCTGCCAGGCCATCACGGAGGTCAATGTCTACGGCTCCGGCACCCTGGTCCTGGTGACAGAGGAACAGTCCCAAGGATGGCACAGATGCTCGGA	CD7 molecule
CD70	NM_001252.2	CD27LG, TNFSF7, CD27L	CCTATGGGTGCGTCCTGCGGGCTGCTTTGGTCCCATTGGTCGCGGGCTTGGTGATCTGCCTCGTGGTGTGCATCCAGCGCTTCGCACAGGCTCAGCAGCA	CD70 molecule
CD74	NM_001025159.1	DHLAG	TTCAGCCCCCAGCCCCTCCCCCATCTCCCACCCTGTACCTCATCCCATGAGACCCTGGTGCCTGGCTCTTTCGTCACCCTTGGACAAGACAAACCAAGTC	CD74 molecule, major histocompatibility complex, class II invariant chain
CD79A	NM_001783.3	IGA, MB-1	AACGAGAAGCTCGGGTTGGATGCCGGGGATGAATATGAAGATGAAAACCTTTATGAAGGCCTGAACCTGGACGACTGCTCCATGTATGAGGACATCTCCC	CD79a molecule, immunoglobulin-associated alpha
CD79B	NM_021602.2	IGB, B29	TTCCTCCAAGGAGCCTCGGACGTTGTCACGGGTTTGGGGTCGGGGACAGAGCGGTGACCATGGCCAGGCTGGCGTTGTCTCCTGTGCCCAGCCACTGGAT	CD79b molecule, immunoglobulin-associated beta
CD80	NM_005191.3	CD28LG, CD28LG1, B7.1, B7-1	AAAGATCTGAAGGTCCCACCTCCATTTGCAATTGACCTCTTCTGGGAACTTCCTCAGATGGACAAGATTACCCCACCTTGCCCTTTACGTATCTGCTCTT	CD80 molecule
CD81	NM_004356.3	TAPA1, TAPA-1, TSPAN28	CAGTGCTCAAGAACAATTTGTGTCCCTCGGGCAGCAACATCATCAGCAACCTCTTCAAGGAGGACTGCCACCAGAAGATCGATGACCTCTTCTCCGGGAA	CD81 molecule
CD82	NM_002231.3	ST6, KAI1, R2, IA4, TSPAN27	CTGGCCTATCCGCTGCCAGCCTTGAGCCCTGGCTGTTCTGTGGTTCCTCTGCTCACCGCCCATCAGGGTTCTCTTAGCAACTCAGAGAAAAATGCTCCCC	CD82 molecule
CD83	NM_004233.3	HB15, BL11	CTGTTCTTGAAGCAGTAGCCTAACACACTCCAAGATATGGACACACGGGAGCCGCTGGCAGAAGGGACTTCACGAAGTGTTGCATGGATGTTTTAGCCAT	CD83 molecule
CD86	NM_175862.3	CD28LG2, B7.2, B7-2	CCAGCTCTGCTCCGTATGCCAAGAGGAGACTTTAATTCTCTTACTGCTTCTTTTCACTTCAGAGCACACTTATGGGCCAAGCCCAGCTTAATGGCTCATG	CD86 molecule
CD8A	NM_001768.5	CD8	GCTCAGGGCTCTTTCCTCCACACCATTCAGGTCTTTCTTTCCGAGGCCCCTGTCTCAGGGTGAGGTGCTTGAGTCTCCAACGGCAAGGGAACAAGTACTT	CD8a molecule
CD8B	NM_004931.3	CD8B1	CAGCTGAGTGTGGTTGATTTCCTTCCCACCACTGCCCAGCCCACCAAGAAGTCCACCCTCAAGAAGAGAGTGTGCCGGTTACCCAGGCCAGAGACCCAGA	CD8b molecule	CD8B2 (NM_001368307;NM_001349727)
CD9	NM_001769.2	MIC3, BA2, P24, TSPAN29, MRP-1	ATATTCGCCATTGAAATAGCTGCGGCCATCTGGGGATATTCCCACAAGGATGAGGTGATTAAGGAAGTCCAGGAGTTTTACAAGGACACCTACAACAAGC	CD9 molecule
CD96	NM_005816.4	TACTILE	CCAGCTACATCTTCAGTGACCCTTGTAGATGTGAGTGCCTTGAGGCCAAACACCACTCCTCAACCCAGCAATTCCAGTATGACTACCCGAGGCTTCAACT	CD96 molecule
CD97	NM_078481.2	ADGRE5, TM7LN1	GAACCTGCATTCCAAGAAGCAAGCCGAACTGGAGGAGATATATGAAAGCAGCATCCGTGGTGTCCAACTCAGACGCCTCTCTGCCGTCAACTCCATCTTT	CD97 molecule
CD99	NM_002414.3	MIC2	AGAAGCTATGCTTCAAAGAAAATGCAGAACAAGGGGAGGTGGACATGGAGAGCCACCGGAATGCCAACGCAGAGCCAGCTGTTCAGCGTACTCTTTTAGA	CD99 molecule
CDH5	NM_001795.3	7B4, CD144	TCTCCCCTTCTCTGCCTCACCTGGTCGCCAATCCATGCTCTCTTTCTTTTCTCTGTCTACTCCTTATCCCTTGGTTTAGAGGAACCCAAGATGTGGCCTT	cadherin 5, type 2 (vascular endothelium)
CDKN1A	NM_000389.2	CDKN1, P21, CIP1, WAF1, SDI1, CAP20, p21CIP1, p21Cip1/Waf1	CATGTGTCCTGGTTCCCGTTTCTCCACCTAGACTGTAAACCTCTCGAGGGCAGGGACCACACCCTGTACTGTTCTGTGTCTTTCACAGCTCCTCCCACAA	cyclin-dependent kinase inhibitor 1A (p21, Cip1)
CEACAM1	NM_001712.3	BGP, BGP1, CD66a	AGAGGGAGGGGTTATAGCTTCAGGAGGGAACCAGCTTCTGATAAACACAATCTGCTAGGAACTTGGGAAAGGAATCAGAGAGCTGCCCTTCAGCGATTAT	carcinoembryonic antigen-related cell adhesion molecule 1 (biliary glycoprotein)
CEACAM6	NM_002483.4	NCA, CD66c	CTGGCAGATTGGACCAGACCCTGAATTCTTCTAGCTCCTCCAATCCCATTTTATCCCATGGAACCACTAAAAACAAGGTCTGCTCTGCTCCTGAAGCCCT	carcinoembryonic antigen-related cell adhesion molecule 6 (non-specific cross reacting antigen)
CEACAM8	NM_001816.3	CGM6, CD66b	ATTTCCCCTTCAGACACCTATTACCATGCAGGGGTAAATCTCAACCTCTCCTGCCATGCGGCCTCTAATCCACCCTCACAGTATTCTTGGTCTGTCAATG	carcinoembryonic antigen-related cell adhesion molecule 8
CEBPB	NM_005194.2	TCF5, LAP, CRP2, NFIL6, IL6DBP, C/EBP-beta	CAACCGCACATGCAGATGGGGCTCCCGCCCGTGGTGTTATTTAAAGAAGAAACGTCTATGTGTACAGATGAATGATAAACTCTCTGCTTCTCCCTCTGCC	CCAAT/enhancer binding protein (C/EBP), beta
CFB	NM_001710.5	BFD, BF, H2-Bf	TAAGCTGAAATATGGCCAGACTATCAGGCCCATTTGTCTCCCCTGCACCGAGGGAACAACTCGAGCTTTGAGGCTTCCTCCAACTACCACTTGCCAGCAA	complement factor B
CFD	NM_001928.2	DF, PFD, ADN	CTGGTTGGTCTTTATTGAGCACCTACTATATGCAGAAGGGGAGGCCGAGGTGGGAGGATCATTGGATCTCAGGAGTTCGAGATCAGCATGGGCCACGTAG	complement factor D (adipsin)
CFH	NM_001014975.2	HF, HF1, HF2, HUS, FHL1, ARMS1	GGAAAAATTGTCAGTAGTGCAATGGAACCAGATCGGGAATACCATTTTGGACAAGCAGTACGGTTTGTATGTAACTCAGGCTACAAGATTGAAGGAGATG	complement factor H
CFI	NM_000204.3	IF, FI, C3b-INA, KAF	TCTGGAGGCCCCTTAGTCTGTATGGATGCCAACAATGTGACTTATGTCTGGGGTGTTGTGAGTTGGGGGGAAAACTGTGGAAAACCAGAGTTCCCAGGTG	complement factor I
CFP	NM_002621.2	PFC	CTGGGGGGTGGTGTCAGCGTGGAAGACTGCTGTCTCAACACTGCCTTTGCCTACCAGAAACGTAGTGGTGGGCTCTGTCAGCCTTGCAGGTCCCCACGAT	complement factor properdin
CHUK	NM_001278.3	TCF16, IKK1, IKK-alpha, IkBKA, NFKBIKA, IKKA	TAGAACCCATGGAAAACTGGCTACAGTTGATGTTGAATTGGGACCCTCAGCAGAGAGGAGGACCTGTTGACCTTACTTTGAAGCAGCCAAGATGTTTTGT	conserved helix-loop-helix ubiquitous kinase
CIITA	NM_000246.3	MHC2TA, C2TA, NLRA	GCCTGAGCAAGGACATTTTCAAGCACATAGGACCAGATGAAGTGATCGGTGAGAGTATGGAGATGCCAGCAGAAGTTGGGCAGAAAAGTCAGAAAAGACC	class II, major histocompatibility complex, transactivator
CISH	NM_145071.2	CIS, G18, CIS-1, SOCS	CACCAATGTACGCATTGAGTATGCCGACTCCAGCTTCCGTCTGGACTCCAACTGCTTGTCCAGGCCACGCATCCTGGCCTTTCCGGATGTGGTCAGCCTT	cytokine inducible SH2-containing protein
CLEC4A	NM_194448.2	CLECSF6, DCIR, DDB27	ATTTCTACTGAATCAGCATCTTGGCAAGACAGTGAGAAGGACTGTGCTAGAATGGAGGCTCACCTGCTGGTGATAAACACTCAAGAAGAGCAGGATTTCA	C-type lectin domain family 4, member A
CLEC4E	NM_014358.2	CLECSF9, mincle	GAGTTTTTTATTGGACTGTCAGACCAGGTTGTCGAGGGTCAGTGGCAATGGGTGGACGGCACACCTTTGACAAAGTCTCTGAGCTTCTGGGATGTAGGGG	C-type lectin domain family 4, member E
CLEC5A	NM_013252.2	CLECSF5, MDL-1	GGCGTTGGATCAACAACTCTGTGTTCAATGGCAATGTTACCAATCAGAATCAGAATTTCAACTGTGCGACCATTGGCCTAACAAAGACATTTGATGCTGC	C-type lectin domain family 5, member A
CLEC6A	NM_001007033.1	CLECSF10, dectin-2	TGGGGATGTTGCCCAGCTTCTTGGAAGTCATTTGGTTCCAGTTGCTACTTCATTTCCAGTGAAGAGAAGGTTTGGTCTAAGAGTGAGCAGAACTGTGTTG	C-type lectin domain family 6, member A
CLEC7A	NM_197954.2	CLECSF12, dectin-1, hDectin-1	TGTTAAACTCCGGTAAGTACCTAGCCCACATGATTTGACTCAGAGATTCTCTTTTGTCCACAGACAGTCATCTCAGGAGCAGAAAGAAAAGAGCTCCCAA	C-type lectin domain family 7, member A
CLU	NM_001831.2	CLI, APOJ, SGP-2, SP-40, TRPM-2, KUB1	TGTCCACCGCCGGTTTATATGATCTTCATACCTTTCCCTGGACCACAGGCGTTTCTCGGCTTTTAGTCTGAACCATAGCTGGGCTGCAGTACCCTACGCT	clusterin
CMKLR1	NM_004072.1		CAACGTCTTCCTCCCAATCCATATCACCTATGCCGCCATGGACTACCACTGGGTTTTCGGGACAGCCATGTGCAAGATCAGCAACTTCCTTCTCATCCAC	chemokine-like receptor 1
CR1	NM_000651.4	CD35, KN	TAAAGTACGAATGCCGTCCTGAGTACTACGGGAGGCCATTCTCTATCACATGTCTAGATAACCTGGTCTGGTCAAGTCCCAAAGATGTCTGTAAACGTAA	complement component (3b/4b) receptor 1 (Knops blood group)
CR2	NM_001006658.1	CD21	GGTGTCAAGCAAATAATATGTGGGGGCCGACACGACTACCAACCTGTGTAAGTGTTTTCCCTCTCGAGTGTCCAGCACTTCCTATGATCCACAATGGACA	complement component (3d/Epstein Barr virus) receptor 2
CRADD	NM_003805.3	RAIDD	CCTCGCTGCTCCTGCACATGTTGGAGTGATGGTGCCTCCAGCAACCGCTGGGGAGTGTGTCCCTGAGTCATGTGGGCTGAATCCTGACTTTCACTCAGAG	CASP2 and RIPK1 domain containing adaptor with death domain
CSF1	NM_000757.4	M-CSF, MCSF, MGC31930	TTTCTATGAGACACCTCTCCAGTTGCTGGAGAAGGTCAAGAATGTCTTTAATGAAACAAAGAATCTCCTTGACAAGGACTGGAATATTTTCAGCAAGAAC	colony stimulating factor 1 (macrophage)
CSF1R	NM_005211.2	FMS, C-FMS, CSFR, CD115	CATACTGGTACTGCTGTAATGAGCCAAGTGGCAGCTAAAAGTTGGGGGTGTTCTGCCCAGTCCCGTCATTCTGGGCTAGAAGGCAGGGGACCTTGGCATG	colony stimulating factor 1 receptor
CSF2	NM_000758.2	GM-CSF, GMCSF	AGATGAGGCTGGCCAAGCCGGGGAGCTGCTCTCTCATGAAACAAGAGCTAGAAACTCAGGATGGTCATCTTGGAGGGACCAAGGGGTGGGCCACAGCCAT	colony stimulating factor 2 (granulocyte-macrophage)
CSF2RB	NM_000395.2	IL3RB, IL5RB, CD131	CCTTATCAGACTGAGATGCGGCTGGTTGTGTTGAGGACTTGTGTGGGCTGCCTGTCCCCGGCAGTCGCTGATGCACATGACATGATTCTCATCTGGGTGC	colony stimulating factor 2 receptor, beta, low-affinity (granulocyte-macrophage)
CSF3R	NM_156038.2	CD114, GCSFR	GTGCCAACATGGGGAAACTGAGGCTCGGCTCGGAAAGGTGAAGTAACTTGTCCAAGATCACAAAGCTGGTGAACATCAAGTTGGTGCTATGGCAAGGCTG	colony stimulating factor 3 receptor (granulocyte)
CTLA4_all	NM_005214.3	CELIAC3, CD152, CD, GSE, CD28, ICOS	AGTCTGTGCGGCAACCTACATGATGGGGAATGAGTTGACCTTCCTAGATGATTCCATCTGCACGGGCACCTCCAGTGGAAATCAAGTGAACCTCACTATC	cytotoxic T-lymphocyte-associated protein 4	targets membrane-bound and soluble CTLA4
CTLA4-TM	NM_005214.3	CELIAC3, CD152, CD, GSE, CD28, ICOS	TCATGTACCCACCGCCATACTACCTGGGCATAGGCAACGGAACCCAGATTTATGTAATTGATCCAGAACCGTGCCCAGATTCTGACTTCCTCCTCTGGAT	cytotoxic T-lymphocyte-associated protein 4	targets membrane-bound CTLA4
sCTLA4	NM_001037631.1	CELIAC3, CD152, CD, GSE, CD28, ICOS	ACCCACCGCCATACTACCTGGGCATAGGCAACGGAACCCAGATTTATGTAATTGCTAAAGAAAAGAAGCCCTCTTACAACAGGGGTCTATGTGAAAATGC	cytotoxic T-lymphocyte-associated protein 4	targets soluble CTLA4
CTNNB1	NM_001098210.1	CTNNB, beta-catenin	TCTTGCCCTTTGTCCCGCAAATCATGCACCTTTGCGTGAGCAGGGTGCCATTCCACGACTAGTTCAGTTGCTTGTTCGTGCACATCAGGATACCCAGCGC	catenin (cadherin-associated protein), beta 1, 88kDa
CTSC	NM_001814.4	PLS, PALS, DPP1	TGCTCGGTTATGGGACCACAAGAAAAAAAAGTAGTGGTGTACCTTCAGAAGCTGGATACAGCATATGATGACCTTGGCAATTCTGGCCATTTCACCATCA	cathepsin C
CTSG	NM_001911.2	CG	AGTCCAGCAGGTCAGAGCAGATGTGGAGGGTTCCTGGTGCGAGAAGACTTTGTGCTGACAGCAGCTCATTGCTGGGGAAGCAATATAAATGTCACCCTGG	cathepsin G
CTSS	NM_004079.3		ATGACAACGGCTTTCCAGTACATCATTGATAACAAGGGCATCGACTCAGACGCTTCCTATCCCTACAAAGCCATGGATCAGAAATGTCAATATGACTCAA	cathepsin S
CUL9	NM_015089.2	H7AP1, KIAA0708, PARC	GAGAAATGGCTTACTCCTGCTCAACCTACTTTTGTGCAACCACCACACTCTGGGAGACCAGATTATAACCCAAGAGCTGAGAGACACGTTGTTTAGGCAC	cullin 9
CX3CL1	NM_002996.3	SCYD1, NTN, C3Xkine, ABCD-3, CXC3C, CXC3, fractalkine, neurotactin	AGCACCACGGTGTGACGAAATGCAACATCACGTGCAGCAAGATGACATCAAAGATACCTGTAGCTTTGCTCATCCACTATCAACAGAACCAGGCATCATG	chemokine (C-X3-C motif) ligand 1
CX3CR1	NM_001337.3	GPR13, CMKBRL1, CMKDR1, V28, CCRL1	GGGCGCTCAGTCCACGTTGATTTCTCCTCATCTGAATCACAAAGGAGCAGGCATGGAAGTGTTCTGAGCAGCAATTTTACTTACCACACGAGTGATGGAG	chemokine (C-X3-C motif) receptor 1
CXCL1	NM_001511.1	MGSA, GRO1, FSP, SCYB1, GROa, MGSA-a, NAP-3	TATGTTAATATTTCTGAGGAGCCTGCAACATGCCAGCCACTGTGATAGAGGCTGGCGGATCCAAGCAAATGGCCAATGAGATCATTGTGAAGGCAGGGGA	chemokine (C-X-C motif) ligand 1 (melanoma growth stimulating activity, alpha)
CXCL10	NM_001565.1	INP10, SCYB10, IFI10, IP-10, crg-2, mob-1, C7, gIP-10	GCAGAGGAACCTCCAGTCTCAGCACCATGAATCAAACTGCGATTCTGATTTGCTGCCTTATCTTTCTGACTCTAAGTGGCATTCAAGGAGTACCTCTCTC	chemokine (C-X-C motif) ligand 10
CXCL11	NM_005409.4	SCYB9B, SCYB11, H174, b-R1, I-TAC, IP-9	TTCAAAAGAGGACGCTGTCTTTGCATAGGCCCTGGGGTAAAAGCAGTGAAAGTGGCAGATATTGAGAAAGCCTCCATAATGTACCCAAGTAACAACTGTG	chemokine (C-X-C motif) ligand 11
CXCL12	NM_000609.5	SDF1A, SDF1B, SDF1, SCYB12, SDF-1a, SDF-1b, PBSF, TLSF-a, TLSF-b, TPAR1	CCAGAGCCAACGTCAAGCATCTCAAAATTCTCAACACTCCAAACTGTGCCCTTCAGATTGTAGCCCGGCTGAAGAACAACAACAGACAAGTGTGCATTGA	chemokine (C-X-C motif) ligand 12
CXCL13	NM_006419.2	SCYB13, BLC, BCA-1, BLR1L, ANGIE, ANGIE2	AGACGCTTCATTGATCGAATTCAAATCTTGCCCCGTGGGAATGGTTGTCCAAGAAAAGAAATCATAGTCTGGAAGAAGAACAAGTCAATTGTGTGTGTGG	chemokine (C-X-C motif) ligand 13
CXCL2	NM_002089.3	GRO2, SCYB2, GROb, MIP-2a, MGSA-b, CINC-2a	ATCACATGTCAGCCACTGTGATAGAGGCTGAGGAATCCAAGAAAATGGCCAGTGAGATCAATGTGACGGCAGGGAAATGTATGTGTGTCTATTTTGTAAC	chemokine (C-X-C motif) ligand 2
CXCL9	NM_002416.1	CMK, MIG, SCYB9, Humig, crg-10	CACCATCTCCCATGAAGAAAGGGAACGGTGAAGTACTAAGCGCTAGAGGAAGCAGCCAAGTCGGTTAGTGGAAGCATGATTGGTGCCCAGTTAGCCTCTG	chemokine (C-X-C motif) ligand 9
CXCR1	NM_000634.2	CMKAR1, IL8RA, CKR-1, CDw128a, CD181	GCAGCCACCAGTCCATTGGGCAGGCAGATGTTCCTAATAAAGCTTCTGTTCCGTGCTTGTCCCTGTGGAAGTATCTTGGTTGTGACAGAGTCAAGGGTGT	chemokine (C-X-C motif) receptor 1
CXCR2	NM_001557.2	IL8RB, CMKAR2, CD182	AGGAGAAACTGGAACTCTCGAGCGTTGCTGGGGGGGATTGTAAAATGGTGTGACCACTGCAGAAGACAGTATGGCAGCTTTCCTCAAAACTTCAGACATA	chemokine (C-X-C motif) receptor 2
CXCR3	NM_001504.1	GPR9, CKR-L2, CMKAR3, IP10-R, MigR, CD183	GTGAGTGACCACCAAGTGCTAAATGACGCCGAGGTTGCCGCCCTCCTGGAGAACTTCAGCTCTTCCTATGACTATGGAGAAAACGAGAGTGACTCGTGCT	chemokine (C-X-C motif) receptor 3
CXCR4	NM_003467.2	LESTR, NPY3R, HM89, NPYY3R, D2S201E, fusin, HSY3RR, NPYR, CD184	ATTGATGTGTGTCTAGGCAGGACCTGTGGCCAAGTTCTTAGTTGCTGTATGTCTCGTGGTAGGACTGTAGAAAAGGGAACTGAACATTCCAGAGCGTGTA	chemokine (C-X-C motif) receptor 4
CXCR6	NM_006564.1	TYMSTR, STRL33, BONZO, CD186	TTACCATGAAGACTATGGGTTCAGCAGTTTCAATGACAGCAGCCAGGAGGAGCATCAAGACTTCCTGCAGTTCAGCAAGGTCTTTCTGCCCTGCATGTAC	chemokine (C-X-C motif) receptor 6
CYBB	NM_000397.3	CGD, GP91-PHOX, NOX2	TTTGAAGCATGAAAAAAGAGGGTTGGAGGTGGAGAATTAACCTCCTGCCATGACTCTGGCTCATCTAGTCCTGCTCCTTGTGCTATAAAATAAATGCAGA	cytochrome b-245, beta polypeptide
DEFB1	NM_005218.3	HBD-1, DEFB-1, DEFB101, HBD1	CTTATAAATACAGTGACGCTCCAGCCTCTGGAAGCCTCTGTCAGCTCAGCCTCCAAAGGAGCCAGCGTCTCCCCAGTTCCTGAAATCCTGGGTGTTGCCT	defensin, beta 1
DEFB103A	NM_001081551.2	HBD-3, HBP-3, HBD3, HBP3, DEFB-3	CATAATGTCATCACTGTAATATGACAAGAATTGCAGCTGTGGCTGGAACCTTTATAAAGTGACCAAGCACACCTTTTCATCCAGTCTCAGCGTGGGGTGA	defensin, beta 103A	DEFB103B (NM_018661)
DEFB103B	NM_018661.3		CAGAAATATTATTGCAGAGTCAGAGGCGGCCGGTGTGCTGTGCTCAGCTGCCTTCCAAAGGAGGAACAGATCGGCAAGTGCTCGACGCGTGGCCGAAAAT	defensin, beta 103B	DEFB103A (NM_001081551)
DEFB4A	NM_004942.2	SAP1, HBD-2, DEFB-2	TTTTTGGTGGTATAGGCGATCCTGTTACCTGCCTTAAGAGTGGAGCCATATGTCATCCAGTCTTTTGCCCTAGAAGGTATAAACAAATTGGCACCTGTGG	defensin, beta 4A	DEFB4B (NM_001205266)
DPP4	NM_001935.3	CD26, ADCP2, DPPIV	CAGCAGTCAGCTCAGATCTCCAAAGCCCTGGTCGATGTTGGAGTGGATTTCCAGGCAATGTGGTATACTGATGAAGACCATGGAATAGCTAGCAGCACAG	dipeptidyl-peptidase 4
DUSP4	NM_057158.2	HVH2, MKP-2, TYP	GCACCGTAGCATGCAGATGTCAAGGCAGTTAGGAAGTAAATGGTGTCTTGTAGATATGTGCAAGGTAGCATGATGAGCAACTTGAGTTTGTTGCCACTGA	dual specificity phosphatase 4
EBI3	NM_005755.2		ATCTTCTCACTGAAGTACTGGATCCGTTACAAGCGTCAGGGAGCTGCGCGCTTCCACCGGGTGGGGCCCATTGAAGCCACGTCCTTCATCCTCAGGGCTG	Epstein-Barr virus induced 3
EDNRB	NM_003991.2	HSCR2, HSCR, ETB	ATACATCAACACGGTTGTGTCCTGCCTTGTGTTCGTGCTGGGGATCATCGGGAACTCCACACTTCTGAGAATTATCTACAAGAACAAGTGCATGCGAAAC	endothelin receptor type B
EGR1	NM_001964.2	TIS8, G0S30, NGFI-A, KROX-24, ZIF-268, AT225, ZNF225	GAGGCATACCAAGATCCACTTGCGGCAGAAGGACAAGAAAGCAGACAAAAGTGTTGTGGCCTCTTCGGCCACCTCCTCTCTCTCTTCCTACCCGTCCCCG	early growth response 1
EGR2	NM_000399.3	KROX20	GGTGGAGCTAGCACTGCCCCCTTTCCACCTAGAAGCAGGTTCTTCCTAAAACTTAGCCCATTCTAGTCTCTCTTAGGTGAGTTGACTATCAACCCAAGGC	early growth response 2
ENTPD1	NM_001098175.1	CD39, NTPDase-1, ATPDase	AGTGTATTAGATGTATTACCTCCATGCTCTCAGTAGAGGCCCATAGGAAAGAGTAGGTAGGTTATGCCAGCTCACACGCATCCTTTAAAAATGGTTTAGA	ectonucleoside triphosphate diphosphohydrolase 1
EOMES	NM_005442.2	TBR2	ATCCCATGCCCTGGGGTATTACCCAGACCCAACCTTTCCTGCAATGGCAGGGTGGGGAGGTCGAGGTTCTTACCAGAGGAAGATGGCAGCTGGACTACCA	eomesodermin
ETS1	NM_005238.3	EWSR2, FLJ10768, ETS-1	GGTTTTACAGCATTAACCTGCCTAACCTTCATGGTGAGAAATACACCATCTCTCTTCTAGTCATGCTGTGCATGCCGCTTACTCTGTTGGGGTCTATATA	v-ets erythroblastosis virus E26 oncogene homolog 1 (avian)
FADD	NM_003824.2	MORT1, GIG3	TGAGACTGCTAAGTAGGGGCAGTGATGGTTGCCAGGACGAATTGAGATAATATCTGTGAGGTGCTGATGAGTGATTGACACACAGCACTCTCTAAATCTT	Fas (TNFRSF6)-associated via death domain
FAS	NM_000043.3	FAS1, APT1, TNFRSF6, CD95, APO-1	CACCGGGGCTTTTCGTGAGCTCGTCTCTGATCTCGCGCAAGAGTGACACACAGGTGTTCAAAGACGCTTCTGGGGAGTGAGGGAAGCGGTTTACGAGTGA	Fas (TNF receptor superfamily, member 6)
FCAR	NM_133280.1	CD89	AAATTCCCTGACGAGGGGCTCTGTCCTCATACTTCCTGCGGAGCTTATTGTCGTAAGAATATCTGTCATCCTGCTAATGTGCATTGAAAGGAGAGCAACG	Fc fragment of IgA, receptor for
FCER1A	NM_002001.2	FCE1A	GAATCCCCTACTCTACTGTGTGTAGCCTTACTGTTCTTCGCTCCAGATGGCGTGTTAGCAGTCCCTCAGAAACCTAAGGTCTCCTTGAACCCTCCATGGA	Fc fragment of IgE, high affinity I, receptor for; alpha polypeptide
FCER1G	NM_004106.1		AGTGGTCTTGCTCTTACTCCTTTTGGTTGAACAAGCAGCGGCCCTGGGAGAGCCTCAGCTCTGCTATATCCTGGATGCCATCCTGTTTCTGTATGGAATT	Fc fragment of IgE, high affinity I, receptor for; gamma polypeptide
FCGR1A/B	NM_000566.3	CD64, CD64A/CD64B	CCAGGAGTGGGTAGATTTCAGGGAGACAAGAGGGAATAGTATAGACAATAAGGAAGGAAATAGTACTTACAAATGACTCCTAAGGGACTGTGAGACTGAG	Fc fragment of IgG, high affinity Ia, receptor (CD64)/Fc fragment of IgG, high affinity Ib, receptor (CD64)
FCGR2A	NM_021642.3	FCG2, FCGR2A1, FCGR2, CD32, CD32A, IGFR2, CDw32	TGGAGACCCAAATGTCTCAGAATGTATGTCCCAGAAACCTGTGGCTGCTTCAACCATTGACAGTTTTGCTGCTGCTGGCTTCTGCAGACAGTCAAGCTGC	Fc fragment of IgG, low affinity IIa, receptor (CD32)
FCGR2A/C	NM_201563.4	FCG2, FCGR2A1, FCGR2, CD32, CD32A, IGFR2, CDw32/hFcRII-C, CD32C	AAAATTCCTGAGCAAACAAAACCACCTGGCCCTTAGAAATAGCTTTAACTTTGCTTAAACTACAAACACAAGCAAAACTTCACGGGGTCATACTACATAC	Fc fragment of IgG, low affinity IIa, receptor (CD32)/Fc fragment of IgG, low affinity IIc, receptor for (CD32)
FCGR2B	NM_001002273.1	FCG2, FCGR2, CD32, CD32B	AGGCTGACAAAGTTGGGGCTGAGAACACAATCACCTATTCACTTCTCATGCACCCGGATGCTCTGGAAGAGCCTGATGACCAGAACCGTATTTAGTCTCC	Fc fragment of IgG, low affinity IIb, receptor (CD32)
FCGR3A/B	NM_000570.4	CD16, CD16a/CD16b	AAGGTTTGGCAGTGTCAACCATCTCATCATTCTCTCCACCTGGGTACCAAGTCTCTTTCTGCTTGGTGATGGTACTCCTTTTTGCAGTGGACACAGGACT	Fc fragment of IgG, low affinity IIIa, receptor (CD16a)/Fc fragment of IgG, low affinity IIIb, receptor (CD16a)
FCGRT	NM_004107.4	FCRN, alpha-chain	ATGCTGATTTGAAGGATGTAAATGTGATTCCAGCCACCGCCTGACCATCCGCCATTCCGACTGCTAAAAGCGAATGTAGTCAGGCCCCTTTCATGCTGTG	Fc fragment of IgG, receptor, transporter, alpha
FKBP5	NM_001145775.1	FKBP51, FKBP54, PPIase, P54, Ptg-10	ACCATTTGTCTTTAGTCTTGGCAAAGGCCAAGTCATCAAGGCATGGGACATTGGGGTGGCTACCATGAAGAAAGGAGAGATATGCCATTTACTGTGCAAA	FK506 binding protein 5
FN1	NM_212482.1	MSF, CIG, LETS, GFND2, FINC	GGGAATGGACATGCATTGCCTACTCGCAGCTTCGAGATCAGTGCATTGTTGATGACATCACTTACAATGTGAACGACACATTCCACAAGCGTCATGAAGA	fibronectin 1
FOXP3	NM_014009.3	IPEX, JM2, XPID, AIID, PIDX, DIETER, SCURFIN	GGGCCATCCTGGAGGCTCCAGAGAAGCAGCGGACACTCAATGAGATCTACCACTGGTTCACACGCATGTTTGCCTTCTTCAGAAACCATCCTGCCACCTG	forkhead box P3
FYN	NM_002037.3	SYN, SLK, MGC45350	GTCTTTGGAGGTGTGAACTCTTCGTCTCATACGGGGACCTTGCGTACGAGAGGAGGAACAGGAGTGACACTCTTTGTGGCCCTTTATGACTATGAAGCAC	FYN oncogene related to SRC, FGR, YES
GATA3	NM_001002295.1	HDR	AAGAGTCCGGCGGCATCTGTCTTGTCCCTATTCCTGCAGCCTGTGCTGAGGGTAGCAGTGTATGAGCTACCAGCGTGCATGTCAGCGACCCTGGCCCGAC	GATA binding protein 3
GBP1	NM_002053.1		CCAGATGACCAGCAGTAGACAAATGGATACTGAGCAGAGTCTTAGGTAAAAGTCTTGGGAAATATTTGGGCATTGGTCTGGCCAAGTCTACAATGTCCCA	guanylate binding protein 1, interferon-inducible
GBP5	NM_052942.3		ATTACAGACTGACCAGGCTCTCACAGAGACGGAAAAAAAGAAGAAAGAGGCACAAGTGAAAGCAGAAGCTGAAAAGGCTGAAGCGCAAAGGTTGGCGGCG	guanylate binding protein 5
GFI1	NM_005263.2	ZNF163	TCATCACTGGAGGTAAAAGCACAAGCAATGCCTGTGGACAAGATGTCATTCATTCACTCAGCAAATGTTCATGGATCACCGGCTACCAAGGTACCAGGCA	growth factor independent 1 transcription repressor
GNLY	NM_006433.2	LAG2, NKG5, LAG-2, D2S69E, TLA519	CAGGAGCTGGGCCGTGACTACAGGACCTGTCTGACGATAGTCCAAAAACTGAAGAAGATGGTGGATAAGCCCACCCAGAGAAGTGTTTCCAATGCTGCGA	granulysin
GP1BB	NM_000407.4	CD42c	GCGCCGCGGGCTGACTTGGGCCTCGCTGCCGACCGCCTTCCCTGTCGACACAACCGAGCTGGTGCTGACCGGCAACAACCTGACGGCGCTGCCGCCGGGG	glycoprotein Ib (platelet), beta polypeptide
GPI	NM_000175.2	AMF, NLK	CAGTGCTCAAGTGACCTCTCACGACGCTTCTACCAATGGGCTCATCAACTTCATCAAGCAGCAGCGCGAGGCCAGAGTCCAATAAACTCGTGCTCATCTG	glucose-6-phosphate isomerase
GPR183	NM_004951.3	EBI2	ACTGGAGAATCGGAGATGCCTTGTGTAGGATAACTGCGCTAGTGTTTTACATCAACACATATGCAGGTGTGAACTTTATGACCTGCCTGAGTATTGACCG	G protein-coupled receptor 183
GZMA	NM_006144.2	HFSP, CTLA3	AGACCCTACATGGTCCTACTTAGTCTTGACAGAAAAACCATCTGTGCTGGGGCTTTGATTGCAAAAGACTGGGTGTTGACTGCAGCTCACTGTAACTTGA	granzyme A (granzyme 1, cytotoxic T-lymphocyte-associated serine esterase 3)
GZMB	NM_004131.3	CTLA1, CSPB, CCPI, CGL-1, CSP-B, CGL1, CTSGL1, HLP, SECT	ACACTACAAGAGGTGAAGATGACAGTGCAGGAAGATCGAAAGTGCGAATCTGACTTACGCCATTATTACGACAGTACCATTGAGTTGTGCGTGGGGGACC	granzyme B (granzyme 2, cytotoxic T-lymphocyte-associated serine esterase 1)
GZMK	NM_002104.2	TRYP2, PRSS	CTGTAAAGGTGTCTTCCACGCTATAGTCTCTGGAGGTCATGAATGTGGTGTTGCCACAAAGCCTGGAATCTACACCCTGTTAACCAAGAAATACCAGACT	granzyme K (granzyme 3; tryptase II)
HAMP	NM_021175.2	LEAP-1, HEPC, HFE2B, LEAP1	CTTGCCTCCTGCTCCTCCTCCTCCTCGCCAGCCTGACCAGTGGCTCTGTTTTCCCACAACAGACGGGACAACTTGCAGAGCTGCAACCCCAGGACAGAGC	hepcidin antimicrobial peptide
HAVCR2	NM_032782.3	Tim-3, TIM3, FLJ14428, TIMD3	TATATGAAGTGGAGGAGCCCAATGAGTATTATTGCTATGTCAGCAGCAGGCAGCAACCCTCACAACCTTTGGGTTGTCGCTTTGCAATGCCATAGATCCA	hepatitis A virus cellular receptor 2
HFE	NM_139011.2	HLA-H	CTCTGTGTTACCCAGTAACTCATCTGTCACCAAGCCTTGGGGATTCTTCCATCTGATTGTGATGTGAGTTGCACAGCTATGAAGGCTGTACACTGCACGA	hemochromatosis
HLA-A	NM_002116.5		GGAAGAGCTCAGATAGAAAAGGAGGGAGTTACACTCAGGCTGCAAGCAGTGACAGTGCCCAGGGCTCTGATGTGTCCCTCACAGCTTGTAAAGTGTGAGA	major histocompatibility complex, class I, A
HLA-B	NM_005514.6		CCCTGAGATGGGAGCCGTCTTCCCAGTCCACCGTCCCCATCGTGGGCATTGTTGCTGGCCTGGCTGTCCTAGCAGTTGTGGTCATCGGAGCTGTGGTCGC	major histocompatibility complex, class I, B
HLA-C	NM_002117.4		AGCTGGGAGCCATCTTCCCAGCCCACCATCCCCATCATGGGCATCGTTGCTGGCCTGGCTGTCCTGGTTGTCCTAGCTGTCCTTGGAGCTGTGGTCACCG	major histocompatibility complex, class I, C
HLA-DMA	NM_006120.3	D6S222E, RING6	TTATTTGACAAAGAGTTCTGCGAGTGGATGATCCAGCAAATAGGGCCAAAACTTGATGGGAAAATCCCGGTGTCCAGAGGGTTTCCTATCGCTGAAGTGT	major histocompatibility complex, class II, DM alpha
HLA-DMB	NM_002118.3	D6S221E, RING7	CCCGTGAGCTGGAAGGAACAGATTTAATATCTAGGGGCTGGGTATCCCCACATCACTCATTTGGGGGGTCAAGGGACCCGGGCAATATAGTATTCTGCTC	major histocompatibility complex, class II, DM beta
HLA-DOB	NM_002120.3		ACGGGACAGAAAAGGTGCAGTTTGTGGTCAGATTCATCTTTAACTTGGAGGAGTATGTACGTTTCGACAGTGATGTGGGGATGTTTGTGGCATTGACCAA	major histocompatibility complex, class II, DO beta
HLA-DPA1	NM_033554.2	HLA-DP1A	GGAGAGATCTGAACTCCAGCTGCCCTACAAACTCCATCTCAGCTTTTCTTCTCACTTCATGTGAAAACTACTCCAGTGGCTGACTGAATTGCTGACCCTT	major histocompatibility complex, class II, DP alpha 1
HLA-DPB1	NM_002121.4	HLA-DP1B	TCCAAATTGGATACTGCTGCCAAGAAGTTGCTCTGAAGTCAGTTTCTATCATTCTGCTCTTTGATTCAAAGCACTGTTTCTCTCACTGGGCCTCCAACCA	major histocompatibility complex, class II, DP beta 1
HLA-DQA1	NM_002122.3	CELIAC1	GGTGGCCTGAGTTCAGCAAATTTGGAGGTTTTGACCCGCAGGGTGCACTGAGAAACATGGCTGTGGCAAAACACAACTTGAACATCATGATTAAACGCTA	major histocompatibility complex, class II, DQ alpha 1
HLA-DQB1	NM_002123.3	HLA-DQB, IDDM1, CELIAC1	GGGGACCCGGGCGGAGTTGGACACGGTGTGCAGACACAACTACGAGGTGGCGTTCCGCGGGATCTTGCAGAGGAGAGTGGAGCCCACAGTGACCATCTCC	major histocompatibility complex, class II, DQ beta 1
HLA-DRA	NM_019111.3	HLA-DRA1	GGCCAACATAGCTGTGGACAAAGCCAACCTGGAAATCATGACAAAGCGCTCCAACTATACTCCGATCACCAATGTACCTCCAGAGGTAACTGTGCTCACG	major histocompatibility complex, class II, DR alpha
HLA-DRB1	NM_002124.2		TGCTGAGCTCCCCACTGGCTTTGTCTGGGGACACCCGACCACGTTTCCTGTGGCAGCCTAAGAGGGAGTGTCATTTCTTCAATGGGACGGAGCGGGTGCG	major histocompatibility complex, class II, DR beta 1
HLA-DRB3	NM_022555.3		GGTCTGAATCTGCACAGAGCAAGATGCTGAGTGGAGTCGGGGGCTTTGTGCTGGGCCTGCTCTTCCTTGGGGCCGGGCTGTTCATCTACTTCAGGAATCA	major histocompatibility complex, class II, DR beta 3	HLA-DRB1 (NM_002124;NM_001359194;NM_001359193;NM_001243965), HLA-DRB4 (NM_021983), HLA-DRB5 (NM_002125)
HRAS	NM_005343.2	HRAS1	AGTACATGCGCACCGGGGAGGGCTTCCTGTGTGTGTTTGCCATCAACAACACCAAGTCTTTTGAGGACATCCACCAGTACAGGGAGCAGATCAAACGGGT	v-Ha-ras Harvey rat sarcoma viral oncogene homolog
ICAM1	NM_000201.2	BB2, CD54	AAATACTGAAACTTGCTGCCTATTGGGTATGCTGAGGCCCCACAGACTTACAGAAGAAGTGGCCCTCCATAGACATGTGTAGCATCAAAACACAAAGGCC	intercellular adhesion molecule 1
ICAM2	NM_000873.3	CD102	ACCTCTCTAGATAAGATTCTGCTGGACGAACAGGCTCAGTGGAAACATTACTTGGTCTCAAACATCTCCCATGACACGGTCCTCCAATGCCACTTCACCT	intercellular adhesion molecule 2
ICAM3	NM_002162.3	CDW50, ICAM-R, CD50	AGCGTCCAGCTGCGAGTCCTGTATGGTCCCAAAATTGACCGAGCCACATGCCCCCAGCACTTGAAATGGAAAGATAAAACGAGACACGTCCTGCAGTGCC	intercellular adhesion molecule 3
ICAM4	NM_001039132.1	LW, CD242	CTGAGGCATGGAAGCCGGGTCATCTATTCCGAAAGCCTGGAGCGCTTCACCGGCCTGGATCTGGCCAACGTGACCTTGACCTACGAGTTTGCTGCTGGAC	intercellular adhesion molecule 4 (Landsteiner-Wiener blood group)
ICAM5	NM_003259.3	TLCN, TLN	TGGACATTCGCGAGCCGGAGACTCAGCCCGTCTGCTTCTTCCGCTGCGCGCGGCGCACACTACAGGCGCGTGGGCTCATTCGCACTTTCCAGCGACCAGA	intercellular adhesion molecule 5, telencephalin
ICOS	NM_012092.2	AILIM, CD278	AACTCTGGCACCCAGGCATGAAGCACGTTGGCCAGTTTTCCTCAACTTGAAGTGCAAGATTCTCTTATTTCCGGGACCACGGAGAGTCTGACTTAACTAC	inducible T-cell co-stimulator
ICOSLG	NM_015259.4	ICOSL, KIAA0653, GL50, B7-H2, B7RP-1, B7H2, B7RP1, ICOS-L, CD275	CTGCTGGCGTTGGCTGTGATCCTGGAATGAGGCCCTTTCAAAAGCGTCATCCACACCAAAGGCAAATGTCCCCAAGTGAGTGGGCTCCCCGCTGTCACTG	inducible T-cell co-stimulator ligand	LOC102723996 (NM_001363770)
IDO1	NM_002164.3	IDO, INDO	CTATTATAAGATGCTCTGAAAACTCTTCAGACACTGAGGGGCACCAGAGGAGCAGACTACAAGAATGGCACACGCTATGGAAAACTCCTGGACAATCAGT	indoleamine 2,3-dioxygenase 1
IFI16	NM_005531.1	IFNGIP1, PYHIN2	ACGACTGAACACAATCAACTGTGAGGAAGGAGATAAACTGAAACTCACCAGCTTTGAATTGGCACCGAAAAGTGGGAATACCGGGGAGTTGAGATCTGTA	interferon, gamma-inducible protein 16
IFI35	NM_005533.3	IFP35	TGCCCTCTGCTTGCGGGCTCTGCTCTGATCACCTTTGATGACCCCAAAGTGGCTGAGCAGGTGCTGCAACAAAAGGAGCACACGATCAACATGGAGGAGT	interferon-induced protein 35
IFIH1	NM_022168.2	MDA-5, Hlcd, MDA5, IDDM19	GCTTGGGAGAACCCTCTCCCTTCTCTGAGAAAGAAAGATGTCGAATGGGTATTCCACAGACGAGAATTTCCGCTATCTCATCTCGTGCTTCAGGGCCAGG	interferon induced with helicase C domain 1
IFIT2	NM_001547.4	IFI54, G10P2, IFI-54, ISG-54K, cig42, GARG-39	TGCATCCCATAGAGGTTAGTCCTGCATAGCCAGTAATGTGCTAAGTTCATCCAAAAGCTGGCGGACCAAAGTCTAAATAGGGCTCAGTATCCCCCATCGC	interferon-induced protein with tetratricopeptide repeats 2
IFITM1	NM_003641.3	IFI17, 9-27, CD225	CCTGTTACTGGTATTCGGCTCTGTGACAGTCTACCATATTATGTTACAGATAATACAGGAAAAACGGGGTTACTAGTAGCCGCCCATAGCCTGCAACCTT	interferon induced transmembrane protein 1 (9-27)
IFNA1/13	NM_024013.1	IFNA@, IFL, IFN, IFN-ALPHA, IFNA13, IFN-alphaD	ATCCCTCTCTTTATCAACAAACTTGCAAGAAAGATTAAGGAGGAAGGAATAACATCTGGTCCAACATGAAAACAATTCTTATTGACTCATACACCAGGTC	interferon, alpha 1/interferon, alpha 13
IFNA2	NM_000605.3	IFNA, IFN-alphaA	GAAAGTTTAAGAAGTAAGGAATGAAAACTGGTTCAACATGGAAATGATTTTCATTGATTCGTATGCCAGCTCACCTTTTTATGATCTGCCATTTCAAAGA	interferon, alpha 2
IFNAR1	NM_000629.2	IFNAR, IFRC	CTAATCAGCTCTCAGTGATCAACCCACTCTTGTTATGGGTGGTCTCTGTCACTTTGAATGCCAGGCTGGCTTCTCGTCTAGCAGTATTCAGATACCCCTT	interferon (alpha, beta and omega) receptor 1
IFNAR2	NM_000874.3	IFNABR	AAATACCACAAGATCATTTTGTGACCTCACAGATGAGTGGAGAAGCACACACGAGGCCTATGTCACCGTCCTAGAAGGATTCAGCGGGAACACAACGTTG	interferon (alpha, beta and omega) receptor 2
IFNB1	NM_002176.2	IFNB, IFB, IFF	ACAGACTTACAGGTTACCTCCGAAACTGAAGATCTCCTAGCCTGTGCCTCTGGGACTGGACAATTGCTTCAAGCATTCTTCAACCAGCAGATGCTGTTTA	interferon, beta 1, fibroblast
IFNG	NM_000619.2		ATACTATCCAGTTACTGCCGGTTTGAAAATATGCCTGCAATCTGAGCCAGTGCTTTAATGGCATGTCAGACAGAACTTGAATGTGTCAGGTGACCCTGAT	interferon, gamma
IFNGR1	NM_000416.1	IFNGR, CD119	CCCGGGCAGCCATCTGACTCCAATAGAGAGAGAGAGTTCTTCACCTTTAAGTAGTAACCAGTCTGAACCTGGCAGCATCGCTTTAAACTCGTATCACTCC	interferon gamma receptor 1
IGF2R	NM_000876.1	CD222, MPRI, MPR1, CIMPR, M6P-R	TGCCGGGCTGCAACCGATATGCATCGGCTTGCCAGATGAAGTATGAAAAAGATCAGGGCTCCTTCACTGAAGTGGTTTCCATCAGTAACTTGGGAATGGC	insulin-like growth factor 2 receptor
IKBKAP	NM_003640.3	DYS, IKAP, TOT1, ELP1, IKI3	GACAGTTTTTTGCTGTGAGTGTTGTTTGCCCAGAAACAGGGGCTCGGAAGGTCAGAGTGTGGAACCGAGAGTTTGCTTTGCAGTCAACCAGTGAGCCTGT	inhibitor of kappa light polypeptide gene enhancer in B-cells, kinase complex-associated protein
IKBKB	NM_001556.1	IKK2, NFKBIKB, IKK-beta, IKKB	GTGATCTATACGCAGCTCAGTAAAACTGTGGTTTGCAAGCAGAAGGCGCTGGAACTGTTGCCCAAGGTGGAAGAGGTGGTGAGCTTAATGAATGAGGATG	inhibitor of kappa light polypeptide gene enhancer in B-cells, kinase beta
IKBKE	NM_014002.2	IKKE, IKK-i, KIAA0151	CCGCATCATCGAACGGCTAAATAGAGTCCCAGCACCTCCTGATGTCTGAGCTCCATGGGGCACATGAGGCATCCTGAAGCATTAGAATGATTCCAACACT	inhibitor of kappa light polypeptide gene enhancer in B-cells, kinase epsilon
IKBKG	NM_003639.2	IP2, IP1, IKK-gamma, NEMO, Fip3p, FIP-3, FIP3	TTCTGCGGGAGCGCTGCGAGGAGCTTCTGCATTTCCAAGCCAGCCAGAGGGAGGAGAAGGAGTTCCTCATGTGCAAGTTCCAGGAGGCCAGGAAACTGGT	inhibitor of kappa light polypeptide gene enhancer in B-cells, kinase gamma
IKZF1	NM_006060.3	ZNFN1A1, hIk-1, LyF-1, Hs.54452, IKAROS	CCGCTGTGTACTACTGTGTGCCTAGATTCCATGCACTCTCGTTGTGTTTGAAGTAAATATTGGAGACCGGAGGGTAACAGGTTGGCCTGTTGATTACAGC	IKAROS family zinc finger 1 (Ikaros)
IKZF2	NM_016260.2	ZNFN1A2, Helios	GAGTCACCATGTACCTCCTATGGAAGATTGTAAGGAACAAGAGCCTATTATGGACAACAATATTTCTCTGGTGCCTTTTGAGAGACCTGCTGTCATAGAG	IKAROS family zinc finger 2 (Helios)
IKZF3	NM_183232.2	ZNFN1A3, Aiolos	ATGTGTATCGGTGTGACCACTGCCGCGTCCTCTTCCTGGACTATGTGATGTTCACGATTCACATGGGCTGCCACGGCTTCCGTGACCCTTTCGAGTGTAA	IKAROS family zinc finger 3 (Aiolos)
IL10	NM_000572.2	CSIF, TGIF, IL10A, IL-10	AAGGATCAGCTGGACAACTTGTTGTTAAAGGAGTCCTTGCTGGAGGACTTTAAGGGTTACCTGGGTTGCCAAGCCTTGTCTGAGATGATCCAGTTTTACC	interleukin 10
IL10RA	NM_001558.2	IL10R, HIL-10R, CDW210A, CD210a	TGCCCAGCCCTCCGTCTGTGTGGTTTGAAGCAGAATTTTTCCACCACATCCTCCACTGGACACCCATCCCAAATCAGTCTGAAAGTACCTGCTATGAAGT	interleukin 10 receptor, alpha
IL11RA	NM_147162.1		TCCAGCCCGCCCTGTTGTCTCCTGCCAAGCAGCCGACTATGAGAACTTCTCTTGCACTTGGAGTCCCAGCCAGATCAGCGGTTTACCCACCCGCTACCTC	interleukin 11 receptor, alpha
IL12A	NM_000882.2	NKSF1, CLMF, IL-12A, p35, NFSK	CTTTCTAGATCAAAACATGCTGGCAGTTATTGATGAGCTGATGCAGGCCCTGAATTTCAACAGTGAGACTGTGCCACAAAAATCCTCCCTTGAAGAACCG	interleukin 12A (natural killer cell stimulatory factor 1, cytotoxic lymphocyte maturation factor 1, p35)
IL12B	NM_002187.2	NKSF2, CLMF, IL-12B, NKSF, CLMF2	GCAAGGCTGCAAGTACATCAGTTTTATGACAATCAGGAAGAATGCAGTGTTCTGATACCAGTGCCATCATACACTTGTGATGGATGGGAACGCAAGAGAT	interleukin 12B (natural killer cell stimulatory factor 2, cytotoxic lymphocyte maturation factor 2, p40)
IL12RB1	NM_005535.1	IL12RB, CD212	GATATCCAGTGATCGTTACGAGTGCTCCTGGCAGTATGAGGGTCCCACAGCTGGGGTCAGCCACTTCCTGCGGTGTTGCCTTAGCTCCGGGCGCTGCTGC	interleukin 12 receptor, beta 1
IL13	NM_002188.2	P600, IL-13, ALRH, BHR1, MGC116786, MGC116788, MGC116789	TTTCTTTCTGATGTCAAAAATGTCTTGGGTAGGCGGGAAGGAGGGTTAGGGAGGGGTAAAATTCCTTAGCTTAGACCTCAGCCTGTGCTGCCCGTCTTCA	interleukin 13
IL13RA1	NM_001560.2	IL-13Ra, NR4, CD213a1	TCTGCACTGGAAGAAGTACGACATCTATGAGAAGCAAACCAAGGAGGAAACCGACTCTGTAGTGCTGATAGAAAACCTGAAGAAAGCCTCTCAGTGATGG	interleukin 13 receptor, alpha 1
IL15	NM_172174.1	IL-15, MGC9721	AGGGTGATAGTCAAATTATGTATTGGTGGGGCTGGGTACCAATGCTGCAGGTCAACAGCTATGCTGGTAGGCTCCTGCCAGTGTGGAACCACTGACTACT	interleukin 15
IL16	NM_004513.4	LCF, IL-16, prIL-16, HsT19289, FLJ42735, FLJ16806	GGCATCTCCAACATCATCATCCAACGAAGACTCAGCTGCAAATGGTTCTGCTGAAACATCTGCCTTGGACACAGGGTTCTCGCTCAACCTTTCAGAGCTG	interleukin 16
IL17A	NM_002190.2	CTLA8, IL17, IL-17A, IL-17	TACTACAACCGATCCACCTCACCTTGGAATCTCCACCGCAATGAGGACCCTGAGAGATATCCCTCTGTGATCTGGGAGGCAAAGTGCCGCCACTTGGGCT	interleukin 17A
IL17B	NM_014443.2	IL-17B, ZCYTO7, IL-20, MGC138900, MGC138901, NIRF	ACCAGGTGCCACTGGACCTGGTGTCACGGATGAAACCGTATGCCCGCATGGAGGAGTATGAGAGGAACATCGAGGAGATGGTGGCCCAGCTGAGGAACAG	interleukin 17B
IL17F	NM_052872.3	IL-17F, ML-1, ML1	GCCCGCCTGTGCCAGGAGGTAGTATGAAGCTTGACATTGGCATCATCAATGAAAACCAGCGCGTTTCCATGTCACGTAACATCGAGAGCCGCTCCACCTC	interleukin 17F
IL18	NM_001562.2	IGIF, IL1F4, IL-1g, IL-18	GACAGTCAGCAAGGAATTGTCTCCCAGTGCATTTTGCCCTCCTGGCTGCCAACTCTGGCTGCTAAAGCGGCTGCCACCTGCTGCAGTCTACACAGCTTCG	interleukin 18 (interferon-gamma-inducing factor)
IL18R1	NM_003855.2	IL1RRP, IL-1Rrp, CD218a	GAATGAGGGGATTTTAAGTGTCTGAAGAGGCATTTTCTAGGGACCAGTGGGTGACTGAGTAACTGAAATGCTGCTTTCACTCCCTAACACCATGGATCTG	interleukin 18 receptor 1
IL18RAP	NM_003853.2	AcPL, CD218b	GCTTGATGGACAATGGAGTGGGATTGAGACTGTGGTTTAGAGCCTTTGATTTCCTGGACTGGACTGACGGCGAGTGAATTCTCTAGACCTTGGGTACTTT	interleukin 18 receptor accessory protein
IL19	NM_013371.3	IL-19, MDA1, ZMDA1, IL-10C, NG.1	CCACAGACATGCACCATATAGAAGAGAGTTTCCAAGAAATCAAAAGAGCCATCCAAGCTAAGGACACCTTCCCAAATGTCACTATCCTGTCCACATTGGA	interleukin 19
IL1A	NM_000575.3	IL1, IL1F1, IL-1A, IL1-ALPHA	ACTCCATGAAGGCTGCATGGATCAATCTGTGTCTCTGAGTATCTCTGAAACCTCTAAAACATCCAAGCTTACCTTCAAGGAGAGCATGGTGGTAGTAGCA	interleukin 1, alpha
IL1B	NM_000576.2	IL1F2, IL-1B, IL1-BETA	GGGACCAAAGGCGGCCAGGATATAACTGACTTCACCATGCAATTTGTGTCTTCCTAAAGAGAGCTGTACCCAGAGAGTCCTGTGCTGAATGTGGACTCAA	interleukin 1, beta
IL1R1	NM_000877.2	IL1R, IL1RA, D2S1473, CD121A	CCAGAGAGTGGGGGTGATGATGACCAAGAATTACAAGTAGAATGGCAGCTGGAATTTAAGGAGGGACAAGAATCAATGGATAAGCGTGGGTGGAGGAAGA	interleukin 1 receptor, type I
IL1R2	NM_173343.1	IL1RB, CD121b	TGCTTCTGCCACGTGCTGCTGGGTCTCAGTCCTCCACTTCCCGTGTCCTCTGGAAGTTGTCAGGAGCAATGTTGCGCTTGTACGTGTTGGTAATGGGAGT	interleukin 1 receptor, type II
IL1RAP	NM_002182.2	IL-1RAcP, IL1R3, C3orf13	CCGCCTCCCCGAGAACCGCATTAGTAAGGAGAAAGATGTGCTGTGGTTCCGGCCCACTCTCCTCAATGACACTGGCAACTATACCTGCATGTTAAGGAAC	interleukin 1 receptor accessory protein
IL1RL1	NM_016232.4	ST2, FIT-1, ST2L, ST2V, DER4, T1, IL33R	CCTCTTGAGTGGTTTAAGAATTGTCAGGCTCTTCAAGGATCAAGGTACAGGGCGCACAAGTCATTTTTGGTCATTGATAATGTGATGACTGAGGACGCAG	interleukin 1 receptor-like 1
IL1RL2	NM_003854.2	IL1R-rp2, IL1RRP2	GTCCAATAAAGTGGTATAAGGACTGTAACGAGATTAAAGGGGAGCGGTTCACTGTTTTGGAAACCAGGCTTTTGGTGAGCAATGTCTCGGCAGAGGACAG	interleukin 1 receptor-like 2
IL1RN	NM_000577.3	IL1RA, ICIL-1RA, IL1F3, IRAP, IL-1RN, MGC10430	GAGTCTGCCGCCTGCCCCGGTTGGTTCCTCTGCACAGCGATGGAAGCTGACCAGCCCGTCAGCCTCACCAATATGCCTGACGAAGGCGTCATGGTCACCA	interleukin 1 receptor antagonist
IL2	NM_000586.2	IL-2, TCGF	AGGATGCAACTCCTGTCTTGCATTGCACTAAGTCTTGCACTTGTCACAAACAGTGCACCTACTTCAAGTTCTACAAAGAAAACACAGCTACAACTGGAGC	interleukin 2
IL20	NM_018724.3	ZCYTO10, IL10D, IL-20	GCGCCATTTGCTAAGACTCTATCTGGACAGGGTATTTAAAAACTACCAGACCCCTGACCATTATACTCTCCGGAAGATCAGCAGCCTCGCCAATTCCTTT	interleukin 20
IL21	NM_021803.2	Za11, IL-21	CATGGAGAGGATTGTCATCTGTCTGATGGTCATCTTCTTGGGGACACTGGTCCACAAATCAAGCTCCCAAGGTCAAGATCGCCACATGATTAGAATGCGT	interleukin 21
IL21R	NM_021798.2	CD360	CGTGTTTGTGGTCAACAGATGACAACAGCCGTCCTCCCTCCTAGGGTCTTGTGTTGCAAGTTGGTCCACAGCATCTCCGGGGCTTTGTGGGATCAGGGCA	interleukin 21 receptor
IL22	NM_020525.4	ILTIF, IL-21, zcyto18, IL-TIF, IL-D110, TIFa, TIFIL-23, IL-22, MGC79382, MGC79384	CTATCTGATGAAGCAGGTGCTGAACTTCACCCTTGAAGAAGTGCTGTTCCCTCAATCTGATAGGTTCCAGCCTTATATGCAGGAGGTGGTGCCCTTCCTG	interleukin 22
IL22RA2	NM_181310.1	CRF2-S1, IL-22BP	CACTTGCAACCATGATGCCTAAACATTGCTTTCTAGGCTTCCTCATCAGTTTCTTCCTTACTGGTGTAGCAGGAACTCAGTCAACGCATGAGTCTCTGAA	interleukin 22 receptor, alpha 2
IL23A	NM_016584.2	SGRF, IL23P19, IL-23, IL-23A, P19	CAGGGACAACAGTCAGTTCTGCTTGCAAAGGATCCACCAGGGTCTGATTTTTTATGAGAAGCTGCTAGGATCGGATATTTTCACAGGGGAGCCTTCTCTG	interleukin 23, alpha subunit p19
IL23R	NM_144701.2	IL-23R	AACTGCAAATTCACCTGGATGATATAGTGATACCTTCTGCAGCCGTCATTTCCAGGGCTGAGACTATAAATGCTACAGTGCCCAAGACCATAATTTATTG	interleukin 23 receptor
IL26	NM_018402.1	AK155, IL-26	CTGTCTCTTGCCATTGCCAAGCACAAGCAATCTTCCTTCACCAAAAGTTGTTACCCAAGGGGAACATTGTCCCAAGCTGTTGACGCTCTCTATATCAAAG	interleukin 26
IL27	NM_145659.3	IL30, IL-27, p28, IL27p28, IL-27A, IL27A, MGC71873	CAGGAGCTGCGGAGGGAGTTCACAGTCAGCCTGCATCTCGCCAGGAAGCTGCTCTCCGAGGTTCGGGGCCAGGCCCACCGCTTTGCGGAATCTCACCTGC	interleukin 27
IL28A	NM_172138.1	IL-28A, IFNL2	TTCAACCTCTTCCGCCTCCTCACGCGAGACCTGAATTGTGTTGCCAGTGGGGACCTGTGTGTCTGACCCTCCCACCAGTCATGCAACCTGAGATTTTATT	interleukin 28A (interferon, lambda 2)	IFNL3 (NM_001346937;NM_172139)
IL28A/B	NM_172139.2	IL-28A, IFNL2/IL-28B, IFNL3, IL28C	CAAGGGGCTGCCACATAGCCCAGTTCAAGTCCCTGTCTCCACAGGAGCTGCAGGCCTTTAAGAGGGCCAAAGATGCCTTAGAAGAGTCGCTTCTGCTGAA	interleukin 28A (interferon, lambda 2)/interleukin 28B (interferon, lambda 3)
IL29	NM_172140.1	IL-29, IFNL1	AGCTAGCGAGCTTCAAGAAGGCCAGGGACGCCTTGGAAGAGTCACTCAAGCTGAAAAACTGGAGTTGCAGCTCTCCTGTCTTCCCCGGGAATTGGGACCT	interleukin 29 (interferon, lambda 1)
IL2RA	NM_000417.1	IL2R, CD25	CTTGGTAAGAAGCCGGGAACAGACAACAGAAGTCATGAAGCCCAAGTGAAATCAAAGGTGCTAAATGGTCGCCCAGGAGACATCCGTTGTGCTTGCCTGC	interleukin 2 receptor, alpha
IL2RB	NM_000878.2	IL15RB, CD122	GTCCTGCTGCCCGAGCCAGGAACTGTGTGTGTTGCAGGGGGGCAGTAACTCCCCAACTCCCTCGTTAATCACAGGATCCCACGAATTTAGGCTCAGAAGC	interleukin 2 receptor, beta
IL2RG	NM_000206.1	SCIDX1, IMD4, CIDX, CD132	CCACAGCTGGACTGAACAATCAGTGGATTATAGACATAAGTTCTCCTTGCCTAGTGTGGATGGGCAGAAACGCTACACGTTTCGTGTTCGGAGCCGCTTT	interleukin 2 receptor, gamma
IL3	NM_000588.3	IL-3, MULTI-CSF, MCGF, MGC79398, MGC79399	GCCCTTGAAGACAAGCTGGGTTAACTGCTCTAACATGATCGATGAAATTATAACACACTTAAAGCAGCCACCTTTGCCTTTGCTGGACTTCAACAACCTC	interleukin 3 (colony-stimulating factor, multiple)
IL32	NM_001012633.1	NK4, TAIF, TAIFb, TAIFd	TTAATAAAACCTGCTTATACTTCCCTGGCAGGGGAGATACCATGATCGCGGAGGTGGGTTTCCCAGGGCAAGGCTGATCTGTTGCCGTATTAGTCCGTTT	interleukin 32	Due to changes in the transcriptome, this probe no longer targets IL32
IL4	NM_000589.2	BSF1, IL-4, BCGF1, BCGF-1, MGC79402	GACACTCGCTGCCTGGGTGCGACTGCACAGCAGTTCCACAGGCACAAGCAGCTGATCCGATTCCTGAAACGGCTCGACAGGAACCTCTGGGGCCTGGCGG	interleukin 4
IL4R	NM_000418.2	CD124	ATCATCTCACCTATGCAGTCAACATTTGGAGTGAAAACGACCCGGCAGATTTCAGAATCTATAACGTGACCTACCTAGAACCCTCCCTCCGCATCGCAGC	interleukin 4 receptor
IL5	NM_000879.2	IL-5, EDF, TRF	CCACAGAAATTCCCACAAGTGCATTGGTGAAAGAGACCTTGGCACTGCTTTCTACTCATCGAACTCTGCTGATAGCCAATGAGACTCTGAGGATTCCTGT	interleukin 5 (colony-stimulating factor, eosinophil)
IL6	NM_000600.1	IFNB2, IL-6, BSF2, HGF, HSF	TGACAAACAAATTCGGTACATCCTCGACGGCATCTCAGCCCTGAGAAAGGAGACATGTAACAAGAGTAACATGTGTGAAAGCAGCAAAGAGGCACTGGCA	interleukin 6 (interferon, beta 2)
IL6R	NM_000565.2	CD126	CTTTCTACATAGTGTCCATGTGCGTCGCCAGTAGTGTCGGGAGCAAGTTCAGCAAAACTCAAACCTTTCAGGGTTGTGGAATCTTGCAGCCTGATCCGCC	interleukin 6 receptor
IL6ST	NM_002184.2	GP130, CD130	CAAAACACTTCGAGCACTGTCCAGTATTCTACCGTGGTACACAGTGGCTACAGACACCAAGTTCCGTCAGTCCAAGTCTTCTCAAGATCCGAGTCTACCC	interleukin 6 signal transducer (gp130, oncostatin M receptor)
IL7	NM_000880.2	IL-7	AATAACCCAGCTTGCGTCCTGCACACTTGTGGCTTCCGTGCACACATTAACAACTCATGGTTCTAGCTCCCAGTCGCCAAGCGTTGCCAAGGCGTTGAGA	interleukin 7
IL7R	NM_002185.2	CD127	TTGCTTTGACCACTCTTCCTGAGTTCAGTGGCACTCAACATGAGTCAAGAGCATCCTGCTTCTACCATGTGGATTTGGTCACAAGGTTTAAGGTGACCCA	interleukin 7 receptor
IL8	NM_000584.2	SCYB8, LUCT, LECT, MDNCF, TSG-1, CXCL8, IL-8, NAP-1, 3-10C, MONAP, AMCF-I, LYNAP, NAF, b-ENAP, GCP-1, K60, GCP1, NAP1	ACAGCAGAGCACACAAGCTTCTAGGACAAGAGCCAGGAAGAAACCACCGGAAGGAACCATCTCACTGTGTGTAAACATGACTTCCAAGCTGGCCGTGGCT	interleukin 8
IL9	NM_000590.1	IL-9, HP40, P40	AAGTACTAAAGAACAACAAGTGTCCATATTTTTCCTGTGAACAGCCATGCAACCAAACCACGGCAGGCAACGCGCTGACATTTCTGAAGAGTCTTCTGGA	interleukin 9
ILF3	NM_001137673.1	NF90, MPHOSPH4, MPP4, DRBP76, NFAR-1	TGTAACAGAAGACAAGTACGAAATACTGCAATCTGTCGACGATGCTGCGATTGTGATAAAAAACACAAAAGAGCCTCCATTGTCCCTGACCATCCACCTG	interleukin enhancer binding factor 3, 90kDa
IRAK1	NM_001569.3	IRAK, pelle	CACAGCCGTGGAAGGACTGGCCCTTGGCAGCTCTGCATCATCGTCGTCAGAGCCACCGCAGATTATCATCAACCCTGCCCGACAGAAGATGGTCCAGAAG	interleukin-1 receptor-associated kinase 1
IRAK2	NM_001570.3		GTGTTGGCCGAGGTCCTCACGGGCATCCCTGCAATGGATAACAACCGAAGCCCGGTTTACCTGAAGGACTTACTCCTCAGTGATATTCCAAGCAGCACCG	interleukin-1 receptor-associated kinase 2
IRAK3	NM_007199.1	IRAK-M	AGGTAAATATAGATCCTTCTTCAGAAGCTCCAGGGCATTCTTGCAGGAGCAGGCCAGTGGAGAGCAGCTGTTCCTCCAAATTTTCCTGGGATGAATATGA	interleukin-1 receptor-associated kinase 3
IRAK4	NM_016123.1	NY-REN-64	GAATTCTCCTTGTAAGCCTTGAAGAAGTATGTGAGAGGGCCACATTGGCTAAAACCTAAAGGTGGCCTCTAGGAGATGAGACCTACCTTCCAGTTGTCAG	interleukin-1 receptor-associated kinase 4
IRF1	NM_002198.1	MAR	CTGTGCGAGTGTACCGGATGCTTCCACCTCTCACCAAGAACCAGAGAAAAGAAAGAAAGTCGAAGTCCAGCCGAGATGCTAAGAGCAAGGCCAAGAGGAA	interferon regulatory factor 1
IRF3	NM_001571.5		TCATGGCCCCAGGACCAGCCGTGGACCAAGAGGCTCGTGATGGTCAAGGTTGTGCCCACGTGCCTCAGGGCCTTGGTAGAAATGGCCCGGGTAGGGGGTG	interferon regulatory factor 3
IRF4	NM_002460.1	MUM1, LSIRF	GGGCACTGTTTAAAGGAAAGTTCCGAGAAGGCATCGACAAGCCGGACCCTCCCACCTGGAAGACGCGCCTGCGGTGCGCTTTGAACAAGAGCAATGACTT	interferon regulatory factor 4
IRF5	NM_002200.3		GCCTGGCTCTCGGGAAATTCAGCCATGAGCAGGGAAAGAACTCTCCCAACCCTGGGGCCTAGCTGTATAGGAGGAATTGCCTAAGGGTGGCCCACTCTTG	interferon regulatory factor 5
IRF7	NM_001572.3		CGCAGCGTGAGGGTGTGTCTTCCCTGGATAGCAGCAGCCTCAGCCTCTGCCTGTCCAGCGCCAACAGCCTCTATGACGACATCGAGTGCTTCCTTATGGA	interferon regulatory factor 7
IRF8	NM_002163.2	ICSBP1, IRF-8, ICSBP	AGTTTAAAGAAGGGGACAAAGCTGAACCAGCCACTTGGAAGACGAGGTTACGCTGTGCTTTGAATAAGAGCCCAGATTTTGAGGAAGTGACGGACCGGTC	interferon regulatory factor 8
IRGM	NM_001145805.1	IRGM1, LRG47, LRG-47, IFI1	CCTGGAGAACTACCTGATGGAAATGCAGTTCAACCGGTATGACTTCATCATGGTTGCATCTGCACAATTCAGCATGAATCATGTGATGCTTGCCAAAACC	immunity-related GTPase family, M
ITGA2B	NM_000419.3	GP2B, CD41B, CD41	AGTTACCGCCCAGGCATCCTTTTGTGGCACGTGTCCTCCCAGAGCCTCTCCTTTGACTCCAGCAACCCAGAGTACTTCGACGGCTACTGGGGGTACTCGG	integrin, alpha 2b (platelet glycoprotein IIb of IIb/IIIa complex, antigen CD41)
ITGA4	NM_000885.4	CD49D, CD49d	GCCCACTGCCAACTGGCTCGCCAACGCTTCAGTGATCAATCCCGGGGCGATTTACAGATGCAGGATCGGAAAGAATCCCGGCCAGACGTGCGAACAGCTC	integrin, alpha 4 (antigen CD49D, alpha 4 subunit of VLA-4 receptor)
ITGA5	NM_002205.2	FNRA, CD49e	AGAAGACTTTGTTGCTGGTGTGCCCAAAGGGAACCTCACTTACGGCTATGTCACCATCCTTAATGGCTCAGACATTCGATCCCTCTACAACTTCTCAGGG	integrin, alpha 5 (fibronectin receptor, alpha polypeptide)
ITGA6	NM_000210.1	CD49f	CTCATGCGAGCCTTCATTGATGTGACTGCTGCTGCCGAAAATATCAGGCTGCCAAATGCAGGCACTCAGGTTCGAGTGACTGTGTTTCCCTCAAAGACTG	integrin, alpha 6
ITGAE	NM_002208.4	CD103, HUMINAE	CTGAATGCAGAGAACCACAGAACTAAGATCACTGTCGTCTTCCTGAAAGATGAGAAGTACCATTCTTTGCCTATCATCATTAAAGGCAGCGTTGGTGGAC	integrin, alpha E (antigen CD103, human mucosal lymphocyte antigen 1; alpha polypeptide)
ITGAL	NM_002209.2	CD11A, LFA-1	GTGAGGGCTTGTCATTACCAGACGGTTCACCAGCCTCTCTTGGTTTCCTTCCTTGGAAGAGAATGTCTGATCTAAATGTGGAGAAACTGTAGTCTCAGGA	integrin, alpha L (antigen CD11A (p180), lymphocyte function-associated antigen 1; alpha polypeptide)
ITGAM	NM_000632.3	CR3A, CD11B, MAC-1, CD11b	GCCCTCCGAGGGTGTCCTCAAGAGGATAGTGACATTGCCTTCTTGATTGATGGCTCTGGTAGCATCATCCCACATGACTTTCGGCGGATGAAGGAGTTTG	integrin, alpha M (complement component 3 receptor 3 subunit)
ITGAX	NM_000887.3	CD11C, CD11c	CCCCTCAGCCTGTTGGCTTCTGTTCACCAGCTGCAAGGGTTTACATACACGGCCACCGCCATCCAAAATGTCGTGCACCGATTGTTCCATGCCTCATATG	integrin, alpha X (complement component 3 receptor 4 subunit)
ITGB1	NM_033666.2	FNRB, MSK12, MDF2, CD29, GPIIA	TTTTAACATTACCAAGGTAGAAAGTCGGGACAAATTACCCCAGCCGGTCCAACCTGATCCTGTGTCCCATTGTAAGGAGAAGGATGTTGACGACTGTTGG	integrin, beta 1 (fibronectin receptor, beta polypeptide, antigen CD29 includes MDF2, MSK12)
ITGB2	NM_000211.2	CD18, MFI7, LFA-1, MAC-1	CATCGACCTGTACTATCTGATGGACCTCTCCTACTCCATGCTTGATGACCTCAGGAATGTCAAGAAGCTAGGTGGCGACCTGCTCCGGGCCCTCAACGAG	integrin, beta 2 (complement component 3 receptor 3 and 4 subunit)
ITLN1	NM_017625.2	ITLN, FLJ20022, LFR, HL-1, hIntL	ATTGGAGTGGATATGGAACTCATGTTGGTTACAGCAGCAGCCGTGAGATAACTGAGGCAGCTGTGCTTCTATTCTATCGTTGAGAGTTTTGTGGGAGGGA	intelectin 1 (galactofuranose binding)
ITLN2	NM_080878.2	HL-2	AGCAGCAGCCTCTTCTCTTGAGATGCTCTCGAGGGAATTCGAAACCTGTGCCTTCTCCTTTTCTTCCCTGCCTAGAAGCTGCAAAGAAATCAAGGAACGC	intelectin 2
JAK1	NM_002227.1	JAK1B, JAK1A, JTK3	GAGAACACCAAGCTCTGGTATGCTCCAAATCGCACCATCACCGTTGATGACAAGATGTCCCTCCGGCTCCACTACCGGATGAGGTTCTATTTCACCAATT	Janus kinase 1
JAK2	NM_004972.2	JTK10	CTCCTCCCGCGACGGCAAATGTTCTGAAAAAGACTCTGCATGGGAATGGCCTGCCTTACGATGACAGAAATGGAGGGAACATCCACCTCTTCTATATATC	Janus kinase 2
JAK3	NM_000215.2	L-JAK, JAKL, LJAK, JAK3_HUMAN, JAK-3	GTGCTGCTGAAGGTCATGGATGCCAAGCACAAGAACTGCATGGAGTCATTCCTGGAAGCAGCGAGCTTGATGAGCCAAGTGTCGTACCGGCATCTCGTGC	Janus kinase 3
KCNJ2	NM_000891.2	Kir2.1, IRK1	CGCTGGCGGTGGATGCTGGTTATCTTCTGCCTGGCTTTCGTCCTGTCATGGCTGTTTTTTGGCTGTGTGTTTTGGTTGATAGCTCTGCTCCATGGGGACC	potassium inwardly-rectifying channel, subfamily J, member 2
KIR_Activating_Subgroup_1	NM_001083539.1	KIR3DS1,KIR2DS1,KIR2DS2,KIR2DS4	GGGAACAGAAGTGAACAGCGAGGATTCTGATGAACAAGACCATCAGGAGGTGTCATACGCATAATTGGAACACTGTGTTTTCACACAGAGAAAAATCACT	killer cell immunoglobulin-like receptor	KIR3DS1 (NM_001282171;NM_001282170;NM_001083539), LOC112268355 (NM_001368254)
KIR_Activating_Subgroup_2	NM_014512.1	KIR2DS1,KIR2DS2,KIR2DS3,KIR2DS4&KIR2DS5	TCCGAAACCGGTAACCCCAGACACCTACATGTTCTGATTGGGACCTCAGTGGTCAAAATCCCTTTCACCATCCTCCTCTTCTTTCTCCTTCATCGCTGGT	killer cell immunoglobulin-like receptor	LOC102725023 (NM_001360171), KIR2DS4 (NM_001281971;NM_012314;NM_001281972), KIR2DS5 (NM_014513), KIR2DS2 (NM_001291700;NM_012312;NM_001291695;NM_001291696), KIR2DS3 (NM_012313), KIR2DS1 (NM_014512)
KIR_Inhibiting_Subgroup_1	NM_014218.2	KIR2DL1,KIR2DL2,KIR2DL4,KIR2DL5,KIR3DL1&KIR3DL3	CAAGAGTCTGCAGGAAACAGAACAGCGAATAGCGAGGACTCTGATGAACAAGACCCTCAGGAGGTGACATACACACAGTTGAATCACTGCGTTTTCACAC	killer cell immunoglobulin-like receptor	KIR2DL2 (NM_014219), KIR2DL1 (NM_014218), LOC112267881 (NM_001368251)
KIR_Inhibiting_Subgroup_2	NM_014511.3	KIR2DL3,KIR2DL4,KIR2DL5&KIR3DL3,KIR2DL1,KIR2DL2,KIR3DL1,KIR3DL2	GGGAACAGAACAGTGAACAGGGAGGACTCTGATGAACAAGACCCTCAGGAGGTGACATATGCACAGTTGAATCACTGCGTTTTCACACAGAGAAAAATCA	killer cell immunoglobulin-like receptor	KIR2DL3 (NM_015868), KIR2DL2 (NM_014219), KIR2DL5A (NM_020535), KIR3DL3 (NM_153443), KIR2DL5B (NM_001018081)
KIR3DL1	NM_013289.2	cl-2, NKB1, cl-11, nkat3, NKB1B, AMB11, CD158e1/2, CD158e1, CD158e2	GGCTGCAATCACACTGAGGAACTCACAATTCCAAACATACAAGAGGCTCCCTCTTGACGTGGCACTTACCCACGTGCTGTTCCACCTTCCCTCATGCTGT	killer cell immunoglobulin-like receptor, three domains, long cytoplasmic tail, 1	KIR2DL3 (NM_015868), KIR3DL2 (NM_001242867;NM_006737)
KIR3DL2	NM_006737.2	cl-5, nkat4, nkat4a, nkat4b, CD158K	TGCCACCCACGGAGGGACCTACAGATGCTTCGGCTCTTTCCGTGCCCTGCCCTGCGTGTGGTCAAACTCAAGTGACCCACTGCTTGTTTCTGTCACAGGA	killer cell immunoglobulin-like receptor, three domains, long cytoplasmic tail, 2
KIR3DL3	NM_153443.3	KIRC1, KIR3DL7, KIR44, CD158z	GGGTTCCCAGGTCAACTATTCCATGGGTCCCATGACACCTGCCCTTGCAGGGACCTACAGATGCTTTGGTTCTGTCACTCACTTACCCTATGAGTTGTCG	killer cell immunoglobulin-like receptor, three domains, long cytoplasmic tail, 3
KIT	NM_000222.2	PBT, CD117, SCFR, C-Kit	GGTCCTATGGGATTTTTCTTTGGGAGCTGTTCTCTTTAGGAAGCAGCCCCTATCCTGGAATGCCGGTCGATTCTAAGTTCTACAAGATGATCAAGGAAGG	v-kit Hardy-Zuckerman 4 feline sarcoma viral oncogene homolog
KLRAP1	NR_028045.1	KLRA1, Ly49, LY49L	CCTTCAGAGTCACAGAATAGATTAAGGCCTGATGATACTCAAAGGCCTGGGAAAACTGATGACAAAGAATTTTCAGTGCCCTGGCACCTCATTGCAGTGA	killer cell lectin-like receptor subfamily A pseudogene 1
KLRB1	NM_002258.2	NKR, CD161, NKR-P1, NKR-P1A, hNKR-P1A, CLEC5B	TGAGTTAAACTTACCCACAGACTCAGGCCCAGAAAGTTCTTCACCTTCATCTCTTCCTCGGGATGTCTGTCAGGGTTCACCTTGGCATCAATTTGCCCTG	killer cell lectin-like receptor subfamily B, member 1
KLRC1	NM_002259.3	NKG2, NKG2-A, NKG2-B, CD159a	ACCTATCACTGCAAAGATTTACCATCAGCTCCAGAGAAGCTCATTGTTGGGATCCTGGGAATTATCTGTCTTATCTTAATGGCCTCTGTGGTAACGATAG	killer cell lectin-like receptor subfamily C, member 1
KLRC2	NM_002260.3	NKG2-C, CD159c	TATGTGAGTCAGCTTATAGGAAGTACCAAGAACAGTCAAACCCATGGAGACAGAAAGTAGAATAGTGGTTGCCAATGTCTCAGGGAGGTTGAAATAGGAG	killer cell lectin-like receptor subfamily C, member 2	KLRC1 (NM_002259;NM_213657;NM_213658;NM_007328)
KLRC3	NM_007333.2	NKG2-E	GGGTGACAATAAATGGTTTGGCTTTCAAACATGAGATAAAAGACTCAGATCATGCTGAACGTAACTGTGCAATGCTACATGTACGTGGACTTATATCAGA	killer cell lectin-like receptor subfamily C, member 3
KLRC4	NM_013431.2	NKG2-F	CAGGAACCAAACAGGAAATATTCCAAGTAGAATTAAACCTTCAAAATGCTTCTTCGGATCATCAAGGGAATGACAAGACATATCACTGCAAAGGTTTACT	killer cell lectin-like receptor subfamily C, member 4
KLRD1	NM_002262.3	CD94	AGCCTGCTTCAGCTTCAAAACACAGATGAACTGGATTTTATGAGCTCCAGTCAACAATTTTACTGGATTGGACTCTCTTACAGTGAGGAGCACACCGCCT	killer cell lectin-like receptor subfamily D, member 1
KLRF1	NM_016523.1	CLEC5C, NKp80	AAAAAGGAAGTTGTTCAAATGCCACTCAGTATGAGGACACTGGAGATCTAAAAGTGAATAATGGCACAAGAAGAAATATAAGTAATAAGGACCTTTGTGC	killer cell lectin-like receptor subfamily F, member 1
KLRF2	NM_001190765.1	NKp65	CCAAGGGAACCTATGGATGTGGATAGATGAACACTTTTTAGTTCCAGAATTGTTTTCAGTGATTGGACCAACTGATGACAGGAGCTGTGCCGTTATCACA	killer cell lectin-like receptor subfamily F, member 2
KLRG1	NM_005810.3	MAFA, 2F1, MAFA-L, CLEC15A	CAGAATGACTATGGACCACAGCAAAAATCTTCCTCTTCCAGGCCTTCTTGTTCTTGCCTTGTGGCAATAGCTTTGGGGCTTCTGACTGCAGTTCTTCTGA	killer cell lectin-like receptor subfamily G, member 1
KLRG2	NM_198508.2	FLJ44186, CLEC15B	TACAGGGGAGGCCAGTTGAGAGCTTGGGCAGCCTCTTCCTGGACCCAGTTATCCAGGTCTTCATGCTCTGCTCAAGGGGGCCACATGAGCGAGCCTAGGA	killer cell lectin-like receptor subfamily G, member 2
KLRK1	NM_007360.1	NKG2D, KLR, NKG2-D, CD314	GGACCAGGATTTACTTAAACTGGTGAAGTCATATCATTGGATGGGACTAGTACACATTCCAACAAATGGATCTTGGCAGTGGGAAGATGGCTCCATTCTC	killer cell lectin-like receptor subfamily K, member 1
LAG3	NM_002286.5	CD223	CTTTTGGTGACTGGAGCCTTTGGCTTTCACCTTTGGAGAAGACAGTGGCGACCAAGACGATTTTCTGCCTTAGAGCAAGGGATTCACCCTCCGCAGGCTC	lymphocyte-activation gene 3
LAIR1	NM_002287.3	CD305	GCACCTGAGGGTAGAAAGTCACTCTAGGAAAAGCCTGAAGCAGCCATTTGGAAGGCTTCCTGTTGGATTCCTCTTCATCTAGAAAGCCAGCCAGGCAGCT	leukocyte-associated immunoglobulin-like receptor 1
LAMP3	NM_014398.3	LAMP, TSC403, DC-LAMP, DCLAMP, CD208	GGTCTCTGCCTTATGGGTATGGGTGTCTATAAAATCCGCCTAAGGTGTCAATCATCTGGATACCAGAGAATCTAATTGTTGCCCGGGGGGAATGAAAATA	lysosomal-associated membrane protein 3
LCK	NM_005356.2		ATTAAGTGGACAGCGCCAGAAGCCATTAACTACGGGACATTCACCATCAAGTCAGATGTGTGGTCTTTTGGGATCCTGCTGACGGAAATTGTCACCCACG	lymphocyte-specific protein tyrosine kinase
LCP2	NM_005565.3	SLP76, SLP-76	TTCCTATGAGCTCCAACACTTTCCCTTCAAGATCTACTAAGCCAAGTCCCATGAACCCTCTCCCATCCTCTCACATGCCTGGAGCATTCTCAGAAAGTAA	lymphocyte cytosolic protein 2 (SH2 domain containing leukocyte protein of 76kDa)
LEF1	NM_016269.3	TCF1ALPHA, TCF10, TCF7L3	CCGTCACACATCCCATCAGATGTCAACTCCAAACAAGGCATGTCCAGACATCCTCCAGCTCCTGATATCCCTACTTTTTATCCCTTGTCTCCGGGTGGTG	lymphoid enhancer-binding factor 1
LGALS3	NM_001177388.1	LGALS2, MAC-2, GALIG	CACGGTGAAGCCCAATGCAAACAGAATTGCTTTAGATTTCCAAAGAGGGAATGATGTTGCCTTCCACTTTAACCCACGCTTCAATGAGAACAACAGGAGA	lectin, galactoside-binding, soluble, 3
LIF	NM_002309.3	CDF, DIA, HILDA	GGGATGGAAGGCTGTCTTCTTTTGAGGATGATCAGAGAACTTGGGCATAGGAACAATCTGGCAGAAGTTTCCAGAAGGAGGTCACTTGGCATTCAGGCTC	leukemia inhibitory factor (cholinergic differentiation factor)
LILRA1	NM_006863.1	LIR-6, CD85i, LIR6	GATCTGATGATGCCAGGAGGTTCCGGGAGACAATTTAGGGCTGATGTTATCTGGACTGTCTGCCAATCATTTTTAGAGGGAGGAATCAGTGTTGGATTGC	leukocyte immunoglobulin-like receptor, subfamily A (with TM domain), member 1
LILRA2	NM_006866.2	LIR-7, ILT1, CD85h, LIR7	GGGAAGAATGGCCAGTTCCCCATCCCATCCATCACCTGGGAACACGCAGGGCGGTATCACTGTCAGTACTACAGCCACAATCACTCATCAGAGTACAGTG	leukocyte immunoglobulin-like receptor, subfamily A (with TM domain), member 2
LILRA3	NM_006865.3	LIR-4, HM43, ILT6, HM31, LIR4, CD85e	GCTGTGTCAGTCACAGGGAGGGATGCACACTTTCCTTTTGACCAAGGAGGGGGCAGCTGATTCCCCGCTGCGTCTAAAATCAAAGCGCCAATCTCATAAG	leukocyte immunoglobulin-like receptor, subfamily A (without TM domain), member 3
LILRA4	NM_012276.3	ILT7, CD85g	AGACTGGGGCAGCAGTTGGGGAAGTGTCTGCTGAGAATATCAAGGGGAAGAAGCATGGGTCAGGTGCAGGAAGATGTCTGGGTGTCTGTAGAAGATGCTT	leukocyte immunoglobulin-like receptor, subfamily A (with TM domain), member 4
LILRA5	NM_181879.2	LILRB7, ILT11, LIR9, CD85, CD85f	CACCCTCTCAGCCCTGCCCAGTCCTGTGGTGACCTCAGGAGAGAACGTGACCCTCCAGTGTGGCTCACGGCTGAGATTCGACAGGTTCATTCTGACTGAG	leukocyte immunoglobulin-like receptor, subfamily A (with TM domain), member 5
LILRA6	NM_024318.2	LILRB6, ILT8, CD85b	CCTTCCCAGCTTGTATGGCAGTCTCCCACCCTCATGTGTTCAATCTGATGATCCCAGGAGGTTCTGGAACAAAATCTACAGCCTATGCTTTCTGGACTAT	leukocyte immunoglobulin-like receptor, subfamily A (with TM domain), member 6
LILRB1	NM_001081637.1	LIR-1, ILT2, MIR-7, CD85, LIR1, CD85j	AGCTGAGAAAACTAAGTCAGAAAGTGCATTAAACTGAATCACAATGTAAATATTACACATCAAGCGATGAAACTGGAAAACTACAAGCCACGAATGAATG	leukocyte immunoglobulin-like receptor, subfamily B (with TM and ITIM domains), member 1
LILRB2	NM_005874.1	LIR-2, ILT4, MIR-10, LIR2, CD85d, MIR10	GAAGGGTGACCCTCCAGTGTGAGTCACAGGTGGCATTTGGCGGCTTCATTCTGTGTAAGGAAGGAGAAGATGAACACCCACAATGCCTGAACTCCCAGCC	leukocyte immunoglobulin-like receptor, subfamily B (with TM and ITIM domains), member 2
LILRB3	NM_006864.2	LIR-3, HL9, ILT5, LIR3, CD85a	AAAAAAACAAAAAACAAAAACAGACGTAAAGGCCGGGTGTGGTACTCAGGAGGCTGAGTGGGGAGGATTCCTTGAACACAAGAAGTTAAGGCTGCTGAGG	leukocyte immunoglobulin-like receptor, subfamily B (with TM and ITIM domains), member 3
LILRB4	NM_001081438.1	LIR-5, ILT3, HM18, LIR5, CD85k	GAAGATTCCGGGAACGTTGGGAGTCACCTGATTCTGCAAAGATAAATAATATCCCTGCATTATCAAAATAAAGTAGCAGACCTCTCAATTCACAATGAGT	leukocyte immunoglobulin-like receptor, subfamily B (with TM and ITIM domains), member 4
LILRB5	NM_001081442.1	LIR-8, LIR8, CD85c	AACCCACTGGAGCCTGGAGCCAAGGCCAAGTTCCACATTCCATCCACGGTGTATGACAGTGCAGGGCGATACCGCTGCTACTATGAGACCCCTGCAGGCT	leukocyte immunoglobulin-like receptor, subfamily B (with TM and ITIM domains), member 5
LITAF	NM_004862.3	PIG7, SIMPLE, FLJ38636, TP53I7	GATCATTGCCCTATCCGAATATCTTCCTGTGATCTGCCATCAGTGGCTCTTTTTTCCTGCTTCCATGGGCCTTTCTGGTGGCAGTCTCAAACTGAGAAGC	lipopolysaccharide-induced TNF factor
LTA	NM_000595.2	TNFB, TNFSF1, LT	CTGATCAAGTCACCGGAGCTTTCAAAGAAGGAATTCTAGGCATCCCAGGGGACCACACCTCCCTGAACCATCCCTGATGTCTGTCTGGCTGAGGATTTCA	lymphotoxin alpha (TNF superfamily, member 1)
LTB4R	NM_181657.3	P2RY7, GPR16, CMKRL1, BLTR, P2Y7, LTB4R1	GTAGTGCCCTGGAAAACGAACATGAGCCTGTGCTTCCCGCGGTACCCCAGCGAAGGGCACCGGGCCTTCCATCTAATCTTCGAGGCTGTCACGGGCTTCC	leukotriene B4 receptor
LTB4R2	NM_019839.4	BLTR2, BLT2, JULF2, NOP9	CAGAGGTCAGTGTTCTGGGACATTTGGGGACCCTTCTTTGACTAGAGTTTGGATCTGGCTGGGTAGGATTACTATACACTTGGGGCAGGCCCAGGCTCCT	leukotriene B4 receptor 2
LTBR	NM_002342.1	D12S370, TNFCR, TNFR-RP, TNFR2-RP, TNF-R-III, TNFRSF3	CTAACAGGGGCCCAAGGAACCAATTTATCACCCATGACTGACGGAGTCTGAGAAAAGGCAGAAGAAGGGGGGCACAAGGGCACTTTCTCCCTTGAGGCTG	lymphotoxin beta receptor (TNFR superfamily, member 3)
LTF	NM_002343.2	HLF2	TTCCCCAACCTGTGTCGCCTGTGTGCGGGGACAGGGGAAAACAAATGTGCCTTCTCCTCCCAGGAACCGTACTTCAGCTACTCTGGTGCCTTCAAGTGTC	lactotransferrin
LY96	NM_015364.2	MD-2	AGAAGTTATTTGCCGAGGATCTGATGACGATTACTCTTTTTGCAGAGCTCTGAAGGGAGAGACTGTGAATACAACAATATCATTCTCCTTCAAGGGAATA	lymphocyte antigen 96
MAF	NM_005360.4	c-MAF	TCTGGGGGTTTCATAGAGACCGGTAGGAAAGCGCACTCCTGCTTTTCGATTTATGGTGTGTGCAAGTAAACAGGTGCATTGCTTTCAACCTGCCATACTA	v-maf musculoaponeurotic fibrosarcoma oncogene homolog (avian)
MALT1	NM_006785.2	MLT	AGTGTTGATGGCGTCTCTGAATCCAAGTTGCAAATCTGTGTTGAACCAACTTCCCAAAAGCTGATGCCAGGCAGCACATTGGTTTTACAGTGTGTTGCTG	mucosa associated lymphoid tissue lymphoma translocation gene 1
MAP4K1	NM_007181.3	HPK1	TGGTCGGCTGCCTTCCACAACTTCATCAAAGTCACTCTGACTAAGAGTCCCAAGAAACGACCCAGCGCCACCAAGATGCTCAGTCATCAACTGGTATCCC	mitogen-activated protein kinase kinase kinase kinase 1
MAP4K2	NM_004579.2	RAB8IP, GCK, BL44	GAAGGCATCTACACACTCAACCTGCATGAACTGCATGAGGATACGCTGGAGAAGCTGATTTCACATCGCTGCTCCTGGCTCTACTGCGTGAACAACGTGC	mitogen-activated protein kinase kinase kinase kinase 2
MAP4K4	NM_004834.3	HGK, NIK, FLH21957	GATGCCTACATCAGTAGCATATATTCGATCCAATCAGACAATGGGCTGGGGAGAGAAGGCCATAGAGATCCGATCTGTGGAAACTGGTCACTTGGATGGT	mitogen-activated protein kinase kinase kinase kinase 4
MAPK1	NM_138957.2	PRKM2, PRKM1, ERK, ERK2, p41mapk, MAPK2	ACTGCCAGAGAACCCTGAGGGAGATAAAAATCTTACTGCGCTTCAGACATGAGAACATCATTGGAATCAATGACATTATTCGAGCACCAACCATCGAGCA	mitogen-activated protein kinase 1
MAPK11	NM_002751.5	PRKM11, p38-2, p38Beta, SAPK2	GCATGCACAAACATGTGTGTACATGTGCTTGCCATGTGTAGGAGTCTGGGCACAAGTGTCCCTGGGCCTACCTTGGTCCTCCTGTCCTCTTCTGGCTACT	mitogen-activated protein kinase 11
MAPK14	NM_001315.1	CSPB1, CSBP1, CSBP2, PRKM14, p38, Mxi2, PRKM15	TGGGCTCTGGCGCCTATGGCTCTGTGTGTGCTGCTTTTGACACAAAAACGGGGTTACGTGTGGCAGTGAAGAAGCTCTCCAGACCATTTCAGTCCATCAT	mitogen-activated protein kinase 14
MAPKAPK2	NM_004759.3		ACGGTGGAGAACTCTTTAGCCGAATCCAGGATCGAGGAGACCAGGCATTCACAGAAAGAGAAGCATCCGAAATCATGAAGAGCATCGGTGAGGCCATCCA	mitogen-activated protein kinase-activated protein kinase 2
MARCO	NM_006770.3	SCARA2	GCTGAAGTTTACTACAGTGGTACCTGGGGGACAATTTGCGATGACGAGTGGCAAAATTCTGATGCCATTGTCTTCTGCCGCATGCTGGGTTACTCCAAAG	macrophage receptor with collagenous structure
MASP1	NM_139125.3	CRARF, PRSS5, MASP	TCAGTTATTTTCTCTCAAGGGCTGAAGTCAGCCACACAGGATAAAGGAGGGAAGGGAAGGAGCAGATCTTTTCGGTAGGAAGACAGATTTTGTTGTCAGG	mannan-binding lectin serine peptidase 1 (C4/C2 activating component of Ra-reactive factor)
MASP2	NM_139208.1	MASP1P1	GACACTTTCTACTCGCTGGGCTCCAGCCTGGACATTACCTTCCGCTCCGACTACTCCAACGAGAAGCCGTTCACGGGGTTCGAGGCCTTCTATGCAGCCG	mannan-binding lectin serine peptidase 2
MBL2	NM_000242.2	MBL, COLEC1	TGGACTTGTCTTTTGGTGGACATGGTGCACTAATTTCACTACCTATCCAGGAGTGGAACTGGTAGAGGATGAGGAAAGCATGTATTCAGCTTTAGTAGAT	mannose-binding lectin (protein C) 2, soluble
MBP	NM_002385.2		GTACCTGGCCACAGCAAGTACCATGGACCATGCCAGGCATGGCTTCCTCCCAAGGCACAGAGACACGGGCATCCTTGACTCCATCGGGCGCTTCTTTGGC	myelin basic protein
MCL1	NM_021960.3	BCL2L3, Mcl-1	GCTGTAACTTCCTAGAGTTGCACCCTAGCAACCTAGCCAGAAAAGCAAGTGGCAAGAGGATTATGGCTAACAAGAATAAATACATGGGAAGAGTGCTCCC	myeloid cell leukemia sequence 1 (BCL2-related)
MIF	NM_002415.1	GIF	TCCTACAGCAAGCTGCTGTGCGGCCTGCTGGCCGAGCGCCTGCGCATCAGCCCGGACAGGGTCTACATCAACTATTACGACATGAACGCGGCCAATGTGG	macrophage migration inhibitory factor (glycosylation-inhibiting factor)
MME	NM_000902.2	CALLA, CD10, NEP	GGATTGTAGGTGCAAGCTGTCCAGAGAAAAGAGTCCTTGTTCCAGCCCTATTCTGCCACTCCTGACAGGGTGACCTTGGGTATTTGCAATATTCCTTTGG	membrane metallo-endopeptidase
MR1	NM_001531.2	HLALS	AACAGTGTCATCTTACAGCTGAAGTCATAGAGGGGAAATATCCCACTCAAGATCATATAACATTCCAGGTACTCAGGATGAATGGTTTGAGGACTGGTCT	major histocompatibility complex, class I-related
MRC1	NM_002438.2	CLEC13D, CD206, bA541I19.1, CLEC13DL	CTATGGAACCACAGACAATCTGTGCTCCAGAGGTTATGAAGCCATGTATACGCTACTAGGCAATGCCAATGGAGCAACCTGTGCATTCCCGTTCAAGTTT	mannose receptor, C type 1
MS4A1	NM_152866.2	CD20, B1, Bp35, MS4A2	CTTCTGATGATCCCAGCAGGGATCTATGCACCCATCTGTGTGACTGTGTGGTACCCTCTCTGGGGAGGCATTATGTATATTATTTCCGGATCACTCCTGG	membrane-spanning 4-domains, subfamily A, member 1
MSR1	NM_002445.3	SCARA1, CD204	AGAGAAACTGAAGTCCTTCAAAGCTGCACTGATTGCCCTTTACCTCCTCGTGTTTGCAGTTCTCATCCCTCTCATTGGAATAGTGGCAGCTCAACTCCTG	macrophage scavenger receptor 1
MUC1	NM_001018017.1	PUM, CD227, PEM	CCCTAGCAGTACCGATCGTAGCCCCTATGAGAAGGTTTCTGCAGGTAATGGTGGCAGCAGCCTCTCTTACACAAACCCAGCAGTGGCAGCCACTTCTGCC	mucin 1, cell surface associated
MX1	NM_002462.2	IFI-78K, MxA	GCCTTTAATCAGGACATCACTGCTCTCATGCAAGGAGAGGAAACTGTAGGGGAGGAAGACATTCGGCTGTTTACCAGACTCCGACACGAGTTCCACAAAT	myxovirus (influenza virus) resistance 1, interferon-inducible protein p78 (mouse)
MYD88	NM_002468.3		ACGTTTTTCTAGGTACAGCTCCCAGGAACAGCTAGGTGGGAAAGTCCCATCACTGAGGGAGCCTAACCATGTCCCTGAACAAAAATTGGGCACTCATCTA	myeloid differentiation primary response gene (88)
NCAM1	NM_000615.5	NCAM, CD56	GGTATTTGCCTATCCCAGTGCCACGATCTCATGGTTTCGGGATGGCCAGCTGCTGCCAAGCTCCAATTACAGCAATATCAAGATCTACAACACCCCCTCT	neural cell adhesion molecule 1
NCF4	NM_000631.4	p40phox, SH3PXD4	CGAGAGTGACTTTGAACAGCTTCCGGATGATGTTGCCATCTCGGCCAACATTGCTGACATCGAGGAGAAGAGAGGCTTCACCAGCCACTTTGTTTTCGTC	neutrophil cytosolic factor 4, 40kDa
NCR1	NM_004829.5	LY94, NK-p46, NKP46, CD335	CGATGTTTTGGCTCCTATAACAACCATGCCTGGTCTTTCCCCAGTGAGCCAGTGAAGCTCCTGGTCACAGGCGACATTGAGAACACCAGCCTTGCACCTG	natural cytotoxicity triggering receptor 1
NFATC1	NM_172389.1	NF-ATC, NFATc, NFAT2	CGAATTCTCTGGTGGTTGAGATCCCGCCATTTCGGAATCAGAGGATAACCAGCCCCGTTCACGTCAGTTTCTACGTCTGCAACGGGAAGAGAAAGCGAAG	nuclear factor of activated T-cells, cytoplasmic, calcineurin-dependent 1
NFATC2	NM_012340.3	NF-ATP, NFATp, NFAT1	GACGGACATTGGAAGAAAGAACACGCGGGTGAGACTGGTTTTCCGAGTTCACATCCCAGAGTCCAGTGGCAGAATCGTCTCTTTACAGACTGCATCTAAC	nuclear factor of activated T-cells, cytoplasmic, calcineurin-dependent 2
NFATC3	NM_004555.2	NFAT4, NFATX	GTCCTTGAAGTTCCTCCATATCATAACCCAGCAGTTACAGCTGCAGTGCAGGTGCACTTTTATCTTTGCAATGGCAAGAGGAAAAAAAGCCAGTCTCAAC	nuclear factor of activated T-cells, cytoplasmic, calcineurin-dependent 3
NFIL3	NM_005384.2	IL3BP1, E4BP4, NFIL3A, NF-IL3A	GTAAGAGCTGGGCATTTAGAAAGATGTCATTTGCAATAGAGCAGTCCATTTTGTATTATGCTGAATTTTCACTGGACCTGTGATGTCATTTCACTGTGAT	nuclear factor, interleukin 3 regulated
NFKB1	NM_003998.2	KBF1, p105, NFKB-p50, p50, NF-kappaB, NFkappaB	AGGGTATAGCTTCCCACACTATGGATTTCCTACTTATGGTGGGATTACTTTCCATCCTGGAACTACTAAATCTAATGCTGGGATGAAGCATGGAACCATG	nuclear factor of kappa light polypeptide gene enhancer in B-cells 1
NFKB2	NM_002502.2	LYT-10, p52	ATCTCCGGGGGCATCAAACCTGAAGATTTCTCGAATGGACAAGACAGCAGGCTCTGTGCGGGGTGGAGATGAAGTTTATCTGCTTTGTGACAAGGTGCAG	nuclear factor of kappa light polypeptide gene enhancer in B-cells 2 (p49/p100)
NFKBIA	NM_020529.1	NFKBI, IKBA, MAD-3, IkappaBalpha	GGATGAGGAGAGCTATGACACAGAGTCAGAGTTCACGGAGTTCACAGAGGACGAGCTGCCCTATGATGACTGTGTGTTTGGAGGCCAGCGTCTGACGTTA	nuclear factor of kappa light polypeptide gene enhancer in B-cells inhibitor, alpha
NFKBIZ	NM_001005474.1	MAIL, FLJ34463	ATTTGGTTCCCGATGGCCCTGTGGGAGAACAGATCCGACGTATCCTGAAGGGAAAGTCCATTCAGCAGAGAGCTCCACCGTATTAGCTCCATTAGCTTGG	nuclear factor of kappa light polypeptide gene enhancer in B-cells inhibitor, zeta
NLRP3	NM_001079821.2	C1orf7, CIAS1, AGTAVPRL, AII, AVP, FCAS, FCU, NALP3, PYPAF1, MWS, CLR1.1	AGTGGGGTTCAGATAATGCACGTGTTTCGAATCCCACTGTGATATGCCAGGAAGACAGCATTGAAGAGGAGTGGATGGGTTTACTGGAGTACCTTTCGAG	NLR family, pyrin domain containing 3
NOD1	NM_006092.1	CARD4, NLRC1, CLR7.1	AGAGGATGCTTTCCTGTTCATGGGGTTTTTGCCCTGGAGCCTCAGCAGCAAATGCCACTCTGGGCAGTCTTTTGTGTCAGTGTCTTAAAGGGGCCTGCGC	nucleotide-binding oligomerization domain containing 1
NOD2	NM_022162.1	IBD1, CARD15, BLAU, CD, PSORAS1, CLR16.3, NLRC2	GGGCCAGAATTTCAAACGGCCTCACTAGGCTTCTGGTTGATGCCTGTGAACTGAACTCTGACAACAGACTTCTGAAATAGACCCACAAGAGGCAGTTCCA	nucleotide-binding oligomerization domain containing 2
NOS2	NM_000625.4	NOS2A, iNOS, NOS, HEP-NOS	TTGCCTGGGGTCCATTATGACTCCCAAAAGTTTGACCAGAGGACCCAGGGACAAGCCTACCCCTCCAGATGAGCTTCTACCTCAAGCTATCGAATTTGTC	nitric oxide synthase 2, inducible
NOTCH1	NM_017617.3	TAN1	CTGCCAGGCTTCACCGGCCAGAACTGTGAGGAAAATATCGACGATTGTCCAGGAAACAACTGCAAGAACGGGGGTGCCTGTGTGGACGGCGTGAACACCT	notch 1
NOTCH2	NM_024408.3		AAGAGTCACCAAATTTTGAGAGTTATACTTGCTTGTGTGCTCCTGGCTGGCAAGGTCAGCGGTGTACCATTGACATTGACGAGTGTATCTCCAAGCCCTG	notch 2
NT5E	NM_002526.2	NT5, CD73, eN, eNT	ATTCGGGTTTTGAAATGGATAAACTCATCGCTCAGAAAGTGAGGGGTGTGGACGTCGTGGTGGGAGGACACTCCAACACATTTCTTTACACAGGCAATCC	5'-nucleotidase, ecto (CD73)
PAX5	NM_016734.1	BSAP	CTCCAAGAGGAGCACACTTTGGGGAGATGTCCTGGTTTCCTGCCTCCATTTCTCTGGGACCGATGCAGTATCAGCAGCTCTTTTCCAGATCAAAGAACTC	paired box 5
PDCD1	NM_005018.1	CD279, PD1	CTTCTTCCCAGCCCTGCTCGTGGTGACCGAAGGGGACAACGCCACCTTCACCTGCAGCTTCTCCAACACATCGGAGAGCTTCGTGCTAAACTGGTACCGC	programmed cell death 1
PDCD1LG2	NM_025239.3	PD-L2, Btdc, PDL2, bA574F11.2, CD273, B7-DC	TGTGGAGCTGTGGCAAGTCCTCATATCAAATACAGAACATGATCTTCCTCCTGCTAATGTTGAGCCTGGAATTGCAGCTTCACCAGATAGCAGCTTTATT	programmed cell death 1 ligand 2
PDCD2	NM_144781.2	ZMYND7, RP8	TTCCTGCTGCAGGTGTATGCGCCGCTGCCTGGCCGCCCGGACGCCTTCCACCGCTGCATCTTCCTCTTCTGCTGCCGCGAGCAGCCGTGCTGTGCCGGCC	programmed cell death 2
PDGFB	NM_033016.2	SIS, SSV	GATTCACCTCTTCCTCTGGTTCCTTTCATCTCTCTACCTCCACCCTGCATTTTCCTCTTGTCCTGGCCCTTCAGTCTGCTCCACCAAGGGGCTCTTGAAC	platelet-derived growth factor beta polypeptide
PDGFRB	NM_002609.3	PDGFR, JTK12, CD140b, PDGFR1	CGTGGGCTTCCTCCCTAATGATGCCGAGGAACTATTCATCTTTCTCACGGAAATAACTGAGATCACCATTCCATGCCGAGTAACAGACCCACAGCTGGTG	platelet-derived growth factor receptor, beta polypeptide
PECAM1	NM_000442.3	CD31	ATCTGCACTGCAGGTATTGACAAAGTGGTCAAGAAAAGCAACACAGTCCAGATAGTCGTATGTGAAATGCTCTCCCAGCCCAGGATTTCTTATGATGCCC	platelet/endothelial cell adhesion molecule
PIGR	NM_002644.2		CTTCCCAGCCATCTCCACGAAGAGTCCCATATTTGGTCCCGAGGAGGTGAATAGTGTGGAAGGTAACTCAGTGTCCATCACGTGCTACTACCCACCCACC	polymeric immunoglobulin receptor
PLA2G2A	NM_000300.2	PLA2B, PLA2L	TTCCCTGGAAACCTTCCACCCAGTGCTGAATTTCCCTCTCTCATACCCTCCCTCCCTACCCTAACCAAGTTCCTTGGCCATGCAGAAAGCATCCCTCACC	phospholipase A2, group IIA (platelets, synovial fluid)
PLA2G2E	NM_014589.1		GGCGTCTGGAGAAGCTGGGCTGTGAGCCCAAACTGGAAAAGTATCTTTTCTCTGTCAGCGAACGTGGCATTTTCTGCGCCGGCAGGACCACCTGCCAGCG	phospholipase A2, group IIE
PLAU	NM_002658.2	URK, UPA	TTCATTGATTACCCAAAGAAGGAGGACTACATCGTCTACCTGGGTCGCTCAAGGCTTAACTCCAACACGCAAGGGGAGATGAAGTTTGAGGTGGAAAACC	plasminogen activator, urokinase
PLAUR	NM_001005376.1	URKR, UPAR, CD87	GAGAAGACCAACAGGACCCTGAGCTATCGGACTGGCTTGAAGATCACCAGCCTTACCGAGGTTGTGTGTGGGTTAGACTTGTGCAACCAGGGCAACTCTG	plasminogen activator, urokinase receptor
PML	NM_002675.3	MYL, TRIM19, RNF71	TCGGAGGAGGAGTTCCAGTTTCTGCGCTGCCAGCAATGCCAGGCGGAAGCCAAGTGCCCGAAGCTGCTGCCTTGTCTGCACACGCTGTGCTCAGGATGCC	promyelocytic leukemia
POU2F2	NM_002698.2	OTF2, 40818	GACGCAAGAAGAGGACCAGCATCGAGACAAACGTCCGCTTCGCCTTAGAGAAGAGTTTTCTAGCGAACCAGAAGCCTACCTCAGAGGAGATCCTGCTGAT	POU class 2 homeobox 2
PPARG	NM_015869.3	PPARG1, PPARG2, NR1C3, PPARgamma	GAGCAAAGAGGTGGCCATCCGCATCTTTCAGGGCTGCCAGTTTCGCTCCGTGGAGGCTGTGCAGGAGATCACAGAGTATGCCAAAAGCATTCCTGGTTTT	peroxisome proliferator-activated receptor gamma
PPBP	NM_002704.2	THBGB1, SCYB7, TGB, NAP-2-L1, LA-PF4, MDGF, LDGF, Beta-TG, CTAP3, CXCL7, PBP, b-TG1, TGB1, CTAPIII, NAP-2	GGAAAGGAACCCATTGCAACCAAGTCGAAGTGATAGCCACACTGAAGGATGGGAGGAAAATCTGCCTGGACCCAGATGCTCCCAGAATCAAGAAAATTGT	pro-platelet basic protein (chemokine (C-X-C motif) ligand 7)
PRDM1	NM_001198.3	BLIMP1, PRDI-BF1	CCCATCCCTGCCAACCAGGAACTTCTTGTGTGGTATTGTCGGGACTTTGCAGAAAGGCTTCACTACCCTTATCCCGGAGAGCTGACAATGATGAATCTCA	PR domain containing 1, with ZNF domain
PRF1	NM_005041.3	PFP, P1, HPLH2	ACTGTTTTTCAGGGAGGTGGCTGGGTTTACACGCTAATCCCGATTCACCCTGTCCAAACTGCCTAAGCCCTCCGCCATTCTCAAGCCCTGCAGTCACAGC	perforin 1 (pore forming protein)
PRKCD	NM_006254.3		ACCATAAACTGGACTCTGCTGGAAAAGCGGAGGTTGGAGCCACCTTTCAGGCCCAAAGTGAAGTCACCCAGAGACTACAGTAACTTTGACCAGGAGTTCC	protein kinase C, delta
PSMB10	NM_002801.2	MECL1, LMP10, MGC1665, beta2i	ACCATCGCGGGCCTGGTGTTCCAAGACGGGGTCATTCTGGGCGCCGATACGCGAGCCACTAACGATTCGGTCGTGGCGGACAAGAGCTGCGAGAAGATCC	proteasome (prosome, macropain) subunit, beta type, 10
PSMB5	NM_001130725.1	X, MB1	CAGCTGCTTGTGTTTCTTGGGGTGACTGTCATTGGTAATACGGACACAGTGACCCATCCTCCATCCTATTTATAGTGGAAGGGCCTTCAATTGTATCAGT	proteasome (prosome, macropain) subunit, beta type, 5
PSMB7	NM_002799.2	Z	GTTACATTGGTGCAGCCCTAGTTTTAGGGGGAGTAGATGTTACTGGACCTCACCTCTACAGCATCTATCCTCATGGATCAACTGATAAGTTGCCTTATGT	proteasome (prosome, macropain) subunit, beta type, 7
PSMB8	NM_004159.4	LMP7, RING10, D6S216E, PSMB5i, beta5i	ACTCACAGAGACAGCTATTCTGGAGGCGTTGTCAATATGTACCACATGAAGGAAGATGGTTGGGTGAAAGTAGAAAGTACAGATGTCAGTGACCTGCTGC	proteasome (prosome, macropain) subunit, beta type, 8 (large multifunctional peptidase 7)
PSMB9	NM_002800.4	LMP2, RING12, beta1i, PSMB6i	TCAGGTATATGGAACCCTGGGAGGAATGCTGACTCGACAGCCTTTTGCCATTGGTGGCTCCGGCAGCACCTTTATCTATGGTTATGTGGATGCAGCATAT	proteasome (prosome, macropain) subunit, beta type, 9 (large multifunctional peptidase 2)
PSMC2	NM_002803.3	MSS1, S7, Nbla10058	CTCCAGAGTGAACAGCCTTTACAGGTTGCCAGGTGTACAAAGATAATCAATGCTGATTCGGAGGACCCAAAATACATTATCAACGTAAAGCAGTTTGCCA	proteasome (prosome, macropain) 26S subunit, ATPase, 2
PSMD7	NM_002811.3	S12, P40, MOV34, Rpn8	CAACCTCGAAAACATTTGAACACGTGACCAGTGAAATTGGAGCAGAGGAAGCTGAGGAAGTTGGAGTTGAACACTTGTTACGAGATATCAAAGACACGAC	proteasome (prosome, macropain) 26S subunit, non-ATPase, 7
PTAFR	NM_000952.3		CCTCACCGAAAAGTTCTACAGCATGCGCAGTAGCCGGAAATGCTCCCGGGCCACCACGGATACGGTCACTGAAGTGGTTGTGCCATTCAACCAGATCCCT	platelet-activating factor receptor
PTGER4	NM_000958.2	EP4	CGCGGGCGCCGAGATCCAGATGGTCATCTTACTCATTGCCACCTCCCTGGTGGTGCTCATCTGCTCCATCCCGCTCGTGGTGCGAGTATTCGTCAACCAG	prostaglandin E receptor 4 (subtype EP4)
PTGS2	NM_000963.1	COX2	GCTACAAAAGCTGGGAAGCCTTCTCTAACCTCTCCTATTATACTAGAGCCCTTCCTCCTGTGCCTGATGATTGCCCGACTCCCTTGGGTGTCAAAGGTAA	prostaglandin-endoperoxide synthase 2 (prostaglandin G/H synthase and cyclooxygenase)
PTK2	NM_005607.3	FAK, FADK, FAK1	GGTTCAAGCTGGATTATTTCAGTGGAACTGGCAATCGGCCCAGAAGAAGGAATCAGTTACCTAACGGACAAGGGCTGCAATCCCACACATCTTGCTGACT	PTK2 protein tyrosine kinase 2
PTPN2	NM_002828.2	PTPT, TCELLPTP, TC-PTP, TCPTP	CCCGCAGCCATGCCCACCACCATCGAGCGGGAGTTCGAAGAGTTGGATACTCAGCGTCGCTGGCAGCCGCTGTACTTGGAAATTCGAAATGAGTCCCATG	protein tyrosine phosphatase, non-receptor type 2
PTPN22	NM_015967.4	PTPN8, Lyp, Lyp1, Lyp2	TTCAAAACCCAAAGGACCAAGGAATCCACCACCAACTTGGAATATTTAATAAAACTCCAGATTTATAATAATATGGGCTGCAAGTACACCTGCAAATAAA	protein tyrosine phosphatase, non-receptor type 22 (lymphoid)
PTPN6	NM_002831.5	HCP, HCPH, PTP-1C, SHP-1, SHP1	TGGTGCAGACGGAGGCGCAGTACAAGTTCATCTACGTGGCCATCGCCCAGTTCATTGAAACCACTAAGAAGAAGCTGGAGGTCCTGCAGTCGCAGAAGGG	protein tyrosine phosphatase, non-receptor type 6
PTPRC_all	NM_080921.2	CD45, LCA, T200, GP180	AGGAGGAAATTGTTCCTCGTCTGATAAGACAACAGTGGAGAAAGGACGCATGCTGTTTCTTAGGGACACGGCTGACTTCCAGATATGACCATGTATTTGT	protein tyrosine phosphatase, receptor type, C	common probe
CD45R0	NM_080921.3	CD45, LCA, T200, GP180	TTTCTGGACACAGAAGTATTTGTGACAGGGCAAAGCCCAACACCTTCCCCCACTGATGCCTACCTTAATGCCTCTGAAACAACCACTCTGAGCCCTTCTG	protein tyrosine phosphatase, receptor type, C	specifically targets CD45R0 isoform
CD45RA	NM_002838.4	CD45, LCA, T200, GP180	TTTCTGGACACAGAAGTATTTGTGACAGGGCAAAGCCCAACACCTTCCCCCACTGGATTGACTACAGCAAAGATGCCCAGTGTTCCACTTTCAAGTGACC	protein tyrosine phosphatase, receptor type, C	specifically targets CD45RA isoform
CD45RB	ENST00000367367.1	CD45, LCA, T200, GP180	TTTCTGGACACAGAAGTATTTGTGACAGGGCAAAGCCCAACACCTTCCCCCACTGGTGTTTCATCAGTACAGACGCCTCACCTTCCCACGCACGCAGACT	protein tyrosine phosphatase, receptor type, C	specifically targets CD45RB isoform
PYCARD	NM_013258.3	TMS-1, CARD5, ASC	ATGCGGAAGCTCTTCAGTTTCACACCAGCCTGGAACTGGACCTGCAAGGACTTGCTCCTCCAGGCCCTAAGGGAGTCCCAGTCCTACCTGGTGGAGGACC	PYD and CARD domain containing
RAF1	NM_002880.2	Raf-1, c-Raf, CRAF	CCTATGGCATCGTATTGTATGAACTGATGACGGGGGAGCTTCCTTATTCTCACATCAACAACCGAGATCAGATCATCTTCATGGTGGGCCGAGGATATGC	v-raf-1 murine leukemia viral oncogene homolog 1
RAG1	NM_000448.2	RNF74, MGC43321	CAGTCTACATTTGTACTCTTTGTGATGCCACCCGTCTGGAAGCCTCTCAAAATCTTGTCTTCCACTCTATAACCAGAAGCCATGCTGAGAACCTGGAACG	recombination activating gene 1
RAG2	NM_000536.3		AGTATGGGTGTTCTCTTTGGAGGACGCTCATACATGCCTTCTACCCACAGAACCACAGAAAAATGGAATAGTGTAGCTGACTGCCTGCCCTGTGTTTTCC	recombination activating gene 2
RARRES3	NM_004585.3	PLAAT4, TIG3, HRASLS4	CTGACCCTCGTGCCCTGTCTCAGGCGTTCTCTAGATCCTTTCCTCTGTTTCCCTCTCTCGCTGGCAAAAGTATGATCTAATTGAAACAAGACTGAAGGAT	retinoic acid receptor responder (tazarotene induced) 3
RELA	NM_021975.2	NFKB3, p65	GATGGCTTCTATGAGGCTGAGCTCTGCCCGGACCGCTGCATCCACAGTTTCCAGAACCTGGGAATCCAGTGTGTGAAGAAGCGGGACCTGGAGCAGGCTA	v-rel reticuloendotheliosis viral oncogene homolog A (avian)
RELB	NM_006509.2	REL-B	CACTCTCGCTCGCCGTTTCCAGGAGCACAGATGAATTGGAGATCATCGACGAGTACATCAAGGAGAACGGCTTCGGCCTGGACGGGGGACAGCCGGGCCC	v-rel reticuloendotheliosis viral oncogene homolog B
RORC	NM_001001523.1	RZRG, RORG, NR1F3, TOR	CTCATCAATGCCCATCGGCCAGGGCTCCAAGAGAAAAGGAAAGTAGAACAGCTGCAGTACAATCTGGAGCTGGCCTTTCATCATCATCTCTGCAAGACTC	RAR-related orphan receptor C
RUNX1	NM_001754.4	AML1, CBFA2, PEBP2A2, AMLCR1	CAGCCATGAAGAACCAGGTTGCAAGATTTAATGACCTCAGGTTTGTCGGTCGAAGTGGAAGAGGGAAAAGCTTCACTCTGACCATCACTGTCTTCACAAA	runt-related transcription factor 1
S100A8	NM_002964.3	CAGA, CFAG, P8, MRP8, 60B8AG, CGLA	CTGATAAAGGGGAATTTCCATGCCGTCTACAGGGATGACCTGAAGAAATTGCTAGAGACCGAGTGTCCTCAGTATATCAGGAAAAAGGGTGCAGACGTCT	S100 calcium binding protein A8
S100A9	NM_002965.2	P14, MIF, NIF, LIAG, MRP14, MAC387, 60B8AG, CGLB	AACATAGAGACCATCATCAACACCTTCCACCAATACTCTGTGAAGCTGGGGCACCCAGACACCCTGAACCAGGGGGAATTCAAAGAGCTGGTGCGAAAAG	S100 calcium binding protein A9
S1PR1	NM_001400.3	EDG1, edg-1, D1S3362, CD363	CCTGACGTTCCGCAAGAACATTTCCAAGGCCAGCCGCAGCTCTGAGAAGTCGCTGGCGCTGCTCAAGACCGTAATTATCGTCCTGAGCGTCTTCATCGCC	sphingosine-1-phosphate receptor 1
SELE	NM_000450.2	ELAM1, ELAM, ESEL, CD62E	AATTCACCTACAAGTCCTCTTGTGCCTTCAGCTGTGAGGAGGGATTTGAATTACATGGATCAACTCAACTTGAGTGCACATCTCAGGGACAATGGACAGA	selectin E
SELL	NR_029467.1	LYAM1, LNHR, LSEL, LAM1, LAM-1, hLHRc, Leu-8, Lyam-1, PLNHR, CD62L	CTAACTCCAGTGAAGTAATGGGGTCCTGCTCAAGTTGAAAGAGTCCTATTTGCACTGTAGCCTCGCCGTCTGTGAATTGGACCATCCTATTTAACTGGCT	selectin L
SELPLG	NM_003006.3	PSGL-1, CD162	CATGGGCTGTTAGGTTGACTTCAGTTTTGCCTCTTGGACAACAGGGGGTCTTGTACATCCTTGGGTGACCAGGAAAAGTTCAGGCTATGGGGGGCCAAAG	selectin P ligand
SERPING1	NM_000062.2	C1NH, C1IN, C1-INH, HAE1, HAE2	GACAGAGGCGAAGGGAAGGTCGCAACAACAGTTATCTCCAAGATGCTATTCGTTGAACCCATCCTGGAGGTTTCCAGCTTGCCGACAACCAACTCAACAA	serpin peptidase inhibitor, clade G (C1 inhibitor), member 1
SH2D1A	NM_001114937.2	IMD5, LYP, XLP, MTCP1, DSHP, XLPD, EBVS, SAP	GCTGTATCACGGTTACATTTATACATACCGAGTGTCCCAGACAGAAACAGGTTCTTGGAGTGCTGAGACAGCACCTGGGGTACATAAAAGATATTTCCGG	SH2 domain containing 1A
SIGIRR	NM_021805.2	TIR8	GTCCTGGGGGTCAACGTGACCAGCACTGAAGTCTATGGGGCCTTCACCTGCTCCATCCAGAACATCAGCTTCTCCTCCTTCACTCTTCAGAGAGCTGGCC	single immunoglobulin and toll-interleukin 1 receptor (TIR) domain
SKI	NM_003036.2		CCTCTGGTGCTTGGTTGAACAAGGGAATCACAAGAAAACGAAAATGCAAAAACTGAACTTCGGGGGTCGTTCTGTGCCTTCCAGCATCTTGTACAGCAAA	v-ski sarcoma viral oncogene homolog (avian)
SLAMF1	NM_003037.2	SLAM, CD150	GTGTCTCTTGATCCATCCGAAGCAGGCCCTCCACGTTATCTAGGAGATCGCTACAAGTTTTATCTGGAGAATCTCACCCTGGGGATACGGGAAAGCAGGA	signaling lymphocytic activation molecule family member 1
SLAMF6	NM_001184714.1	KALI, NTBA, KALIb, Ly108, SF2000, NTB-A, CD352	TTTTTCCAGGGCAACTGCCCTTGACAATGTCGTGTAAGTTGCTGAAAGGCCTCAGAGGAATTCGGGAATGACACGTCTTCTGATCCCATGAGACAGAACA	SLAM family member 6
SLAMF7	NM_021181.3	CRACC, 19A, CS1, CD319	GGGCACTATCATAGTGACCCAAAATCGTAATAGGGAGAGAGTAGACTTCCCAGATGGAGGCTACTCCCTGAAGCTCAGCAAACTGAAGAAGAATGACTCA	SLAM family member 7
SLC2A1	NM_006516.2	GLUT1, GLUT, DYT18	AGGCTCCATTAGGATTTGCCCCTTCCCATCTCTTCCTACCCAACCACTCAAATTAATCTTTCTTTACCTGAGACCAGTTGGGAGCACTGGAGTGCAGGGA	solute carrier family 2 (facilitated glucose transporter), member 1
SMAD3	NM_005902.3	MADH3, JV15-2, HsT17436	TTAAAGGACAGTTGAAAAGGGCAAGAGGAAACCAGGGCAGTTCTAGAGGAGTGCTGGTGACTGGATAGCAGTTTTAAGTGGCGTTCACCTAGTCAACACG	SMAD family member 3
SMAD5	NM_005903.5	MADH5, Dwfc, JV5-1	CCTGATGATCAGATGGGTCAAGATAATTCCCAGCCTATGGATACAAGCAATAATATGATTCCTCAGATTATGCCCAGTATATCCAGCAGGGATGTTCAGC	SMAD family member 5
SOCS1	NM_003745.1	SOCS-1, SSI-1, JAB, TIP3, Cish1	TTAACTGTATCTGGAGCCAGGACCTGAACTCGCACCTCCTACCTCTTCATGTTTACATATACCCAGTATCTTTGCACAAACCAGGGGTTGGGGGAGGGTC	suppressor of cytokine signaling 1
SOCS3	NM_003955.3	SSI-3, CIS3, SOCS-3, Cish3	GGAGGATGGAGGAGACGGGACATCTTTCACCTCAGGCTCCTGGTAGAGAAGACAGGGGATTCTACTCTGTGCCTCCTGACTATGTCTGGCTAAGAGATTC	suppressor of cytokine signaling 3
SPP1	NM_000582.2	BNSP, OPN, BSPI, ETA-1	CGCCTTCTGATTGGGACAGCCGTGGGAAGGACAGTTATGAAACGAGTCAGCTGGATGACCAGAGTGCTGAAACCCACAGCCACAAGCAGTCCAGATTATA	secreted phosphoprotein 1
SRC	NM_005417.3	SRC1, ASV, c-src	GGCATGAGAAGCTGGTGCAGTTGTATGCTGTGGTTTCAGAGGAGCCCATTTACATCGTCACGGAGTACATGAGCAAGGGGAGTTTGCTGGACTTTCTCAA	v-src sarcoma (Schmidt-Ruppin A-2) viral oncogene homolog (avian)
STAT1	NM_007315.2	STAT91, ISGF-3	TTTGCTGTATGCCATCCTCGAGAGCTGTCTAGGTTAACGTTCGCACTCTGTGTATATAACCTCGACAGTCTTGGCACCTAACGTGCTGTGCGTAGCTGCT	signal transducer and activator of transcription 1, 91kDa
STAT2	NM_005419.2	STAT113	CCGTACACGAAGGAGGTGCTGCAGTCACTCCCGCTGACTGAAATCATCCGCCATTACCAGTTGCTCACTGAGGAGAATATACCTGAAAACCCACTGCGCT	signal transducer and activator of transcription 2, 113kDa
STAT3	NM_139276.2	APRF	AGACTTGGGCTTACCATTGGGTTTAAATCATAGGGACCTAGGGCGAGGGTTCAGGGCTTCTCTGGAGCAGATATTGTCAAGTTCATGGCCTTAGGTAGCA	signal transducer and activator of transcription 3 (acute-phase response factor)
STAT4	NM_003151.2		AGACAATGGATCAGAGTGACAAGAATAGTGCCATGGTGAATCAGGAAGTTTTGACACTGCAGGAAATGCTTAACAGCCTCGATTTCAAGAGAAAGGAGGC	signal transducer and activator of transcription 4
STAT5A	NM_003152.2	STAT5, MGF	GAGACAGAGAGAGAGAAAGAGAGAGTGTGTGGGTCTATGTAAATGCATCTGTCCTCATGTGTTGATGTAACCGATTCATCTCTCAGAAGGGAGGCTGGGG	signal transducer and activator of transcription 5A
STAT5B	NM_012448.3		AAGGAGAAGCCCTTCATCAGATGCAAGCGTTATATGGCCAGCATTTTCCCATTGAGGTGCGGCATTATTTATCCCAGTGGATTGAAAGCCAAGCATGGGA	signal transducer and activator of transcription 5B
STAT6	NM_003153.3	D12S1644, IL-4-STAT	AGAACATCCAGCCATTCTCTGCCAAAGACCTGTCCATTCGCTCACTGGGGGACCGAATCCGGGATCTTGCTCAGCTCAAAAATCTCTATCCCAAGAAGCC	signal transducer and activator of transcription 6, interleukin-4 induced
SYK	NM_003177.3		CGGACTCTCCAAAGCACTGCGTGCTGATGAAAACTACTACAAGGCCCAGACCCATGGAAAGTGGCCTGTCAAGTGGTACGCTCCGGAATGCATCAACTAC	spleen tyrosine kinase
TAGAP	NM_054114.3	FLJ32631, IDDM21, ARHGAP47	CTCTCTCTCTCCCAGTGGACTAGAAGGAGCAGAGAGTTATGCTGTTTCTCCCATTCTTTACAGCTCACCGGATGTAAAAGAACTCTGGCTAGAGACCCTC	T-cell activation RhoGTPase activating protein
TAL1	NM_003189.2	TCL5, SCL, bHLHa17	ACAGCATCTGTAGTCAGCCGACAACTATTTCGGCCTTTTGGGGGTGGGTCTGGCCGTACTTGTGATTTCGATGGTACGTGACCCTCTGCTGAAGACTTGC	T-cell acute lymphocytic leukemia 1
TAP1	NM_000593.5	ABCB2, PSF1, RING4, D6S114E	GTGGCTGCAGTGGGACAAGAGCCACAGGTATTTGGAAGAAGTCTTCAAGAAAATATTGCCTATGGCCTGACCCAGAAGCCAACTATGGAGGAAATCACAG	transporter 1, ATP-binding cassette, sub-family B (MDR/TAP)
TAP2	NM_000544.3	ABCB3, PSF2, RING11, D6S217E	GGCTTCCTTTAAATGCCAATGTGCTCTTGCGAAGCCTGGTGAAAGTGGTGGGGCTGTATGGCTTCATGCTCAGCATATCGCCTCGACTCACCCTCCTTTC	transporter 2, ATP-binding cassette, sub-family B (MDR/TAP)
TAPBP	NM_003190.4	TAPA	GGTCACCCTGGAGGTAGCAGGTCTTTCAGGGCCCTCCCTTGAGGACAGCGTAGGCCTTTTCCTGTCTGCCTTTCTTCTGCTTGGGCTCTTCAAGGCACTG	TAP binding protein (tapasin)
TBK1	NM_013254.2	NAK	ACCAGTCTTCAGGATATCGACAGCAGATTATCTCCAGGTGGATCACTGGCAGACGCATGGGCACATCAAGAAGGCACTCATCCGAAAGACAGAAATGTAG	TANK-binding kinase 1
TBX21	NM_013351.1	TBLYM, T-bet	ACACAGGAGCGCACTGGATGCGCCAGGAAGTTTCATTTGGGAAACTAAAGCTCACAAACAACAAGGGGGCGTCCAACAATGTGACCCAGATGATTGTGCT	T-box 21
TCF4	NM_003199.1	SEF2-1B, ITF2, bHLHb19, E2-2	TGGAATCATTGGACCTTCTCATAATGGAGCCATGGGTGGTCTGGGCTCAGGGTATGGAACCGGCCTTCTTTCAGCCAACAGACATTCACTCATGGTGGGG	transcription factor 4
TCF7	NM_003202.2	TCF-1	ATTCCATTTCCAGTTCATCTATGGCAGTCCAGCCAGCTCCTGGGCAGCTTGAGAGGGCAAACCCAAAACCTCATGACAGCCAGAGCCTGTCTTTCAGCAT	transcription factor 7 (T-cell specific, HMG-box)
TFRC	NM_003234.1	CD71, TFR1	CAGTTTCCACCATCTCGGTCATCAGGATTGCCTAATATACCTGTCCAGACAATCTCCAGAGCTGCTGCAGAAAAGCTGTTTGGGAATATGGAAGGAGACT	transferrin receptor (p90, CD71)
TGFB1	NM_000660.3	TGFB, DPD1, CED, TGFbeta	TATATGTTCTTCAACACATCAGAGCTCCGAGAAGCGGTACCTGAACCCGTGTTGCTCTCCCGGGCAGAGCTGCGTCTGCTGAGGCTCAAGTTAAAAGTGG	transforming growth factor, beta 1
TGFBI	NM_000358.2	CSD3, LCD1, CSD1, CSD2, BIGH3, CDB1, CDGG1	GTGGTCCATGTCATCACCAATGTTCTGCAGCCTCCAGCCAACAGACCTCAGGAAAGAGGGGATGAACTTGCAGACTCTGCGCTTGAGATCTTCAAACAAG	transforming growth factor, beta-induced, 68kDa
TGFBR1	NM_004612.2	ALK-5, ACVRLK4	GGGGAAATACGACTTAGTGAGGCATAGACATCCCTGGTCCATCCTTTCTGTCTCCAGCTGTTTCTTGGAACCTGCTCTCCTGCTTGCTGGTCCCTGACGC	transforming growth factor, beta receptor 1
TGFBR2	NM_001024847.1	MFS2	ATTTGGAGAATGTTGAGTCCTTCAAGCAGACCGATGTCTACTCCATGGCTCTGGTGCTCTGGGAAATGACATCTCGCTGTAATGCAGTGGGAGAAGTAAA	transforming growth factor, beta receptor II (70/80kDa)
THY1	NM_006288.2	CD90	CCTGCCTAGTGGACCAGAGCCTTCGTCTGGACTGCCGCCATGAGAATACCAGCAGTTCACCCATCCAGTACGAGTTCAGCCTGACCCGTGAGACAAAGAA	Thy-1 cell surface antigen
TICAM1	NM_014261.1	TRIF, TICAM-1, MGC35334, PRVTIRB	CCCCAGTCTCTCCCCTTGCCTATTCTGGAGCCGGTCAAAAACCCCTGCTCTGTCAAAGACCAGACGCCACTCCAACTTTCTGTAGAAGATACCACCTCTC	toll-like receptor adaptor molecule 1
TIGIT	NM_173799.2	VSIG9, VSTM3, FLJ39873, DKFZp667A205	TGGATCTTAGAAGACTTTTATCCTTCCACCATCTCTCTCAGAGGAATGAGCGGGGAGGTTGGATTTACTGGTGACTGATTTTCTTTCATGGGCCAAGGAA	T cell immunoreceptor with Ig and ITIM domains
TIRAP	NM_148910.2	Mal, wyatt	ACCCACACATGCGAGTGACAGTGGCAGTAGTCGCTGGAGCAAAGACTATGACGTCTGCGTGTGCCACAGTGAGGAAGACCTGGTGGCCGCCCAGGACCTG	toll-interleukin 1 receptor (TIR) domain containing adaptor protein
TLR1	NM_003263.3	rsc786, KIAA0012, CD281	TCAACCAGGAATTGGAATACTTGGATTTGTCCCACAACAAGTTGGTGAAGATTTCTTGCCACCCTACTGTGAACCTCAAGCACTTGGACCTGTCATTTAA	toll-like receptor 1
TLR2	NM_003264.3	TIL4, CD282	CTGCTTTCAACTGGTAGTTGTGGGTTGAAGCACTGGACAATGCCACATACTTTGTGGATGGTGTGGGTCTTGGGGGTCATCATCAGCCTCTCCAAGGAAG	toll-like receptor 2
TLR3	NM_003265.2	CD283	CAGGTACCCGATGATCTACCCACAAACATAACAGTGTTGAACCTTACCCATAATCAACTCAGAAGATTACCAGCCGCCAACTTCACAAGGTATAGCCAGC	toll-like receptor 3
TLR4	NM_138554.2	hToll, CD284	ACTCAGAAAAGCCCTGCTGGATGGTAAATCATGGAATCCAGAAGGAACAGTGGGTACAGGATGCAATTGGCAGGAAGCAACATCTATCTGAAGAGGAAAA	toll-like receptor 4
TLR5	NM_003268.3	TIL3, SLEB1, FLJ10052, MGC126430, MGC126431	GTTCCTGGCACTACTACAAGATTCATACTCCTGATGCTACTGACAACGTGGCTTCTCCACAGTCACCAAACCAGGGATGCTATACTGGACTTCCCTACTC	toll-like receptor 5
TLR7	NM_016562.3		TGTGGGCACCACACAGGTGGTTGCTGCTTCAGTGCTTCCTGCTCTTTTTCCTTGGGCCTGCTTCTGGGTTCCATAGGGAAACAGTAAGAAAGAAAGACAC	toll-like receptor 7
TLR8	NM_016610.2	CD288	TTTAACTGATAGCCTATCTGACTTTACATCTTCCCTTCGGACACTGCTGCTGAGTCATAACAGGATTTCCCACCTACCCTCTGGCTTTCTTTCTGAAGTC	toll-like receptor 8
TLR9	NM_017442.2	CD289	ACCTTCTTGGCTGTGCCCACCCTGGAAGAGCTAAACCTGAGCTACAACAACATCATGACTGTGCCTGCGCTGCCCAAATCCCTCATATCCCTGTCCCTCA	toll-like receptor 9
TMEM173	NM_198282.1	STING1, FLJ38577, NET23	CTGGCATGGTCATATTACATCGGATATCTGCGGCTGATCCTGCCAGAGCTCCAGGCCCGGATTCGAACTTACAATCAGCATTACAACAACCTGCTACGGG	transmembrane protein 173
TNF	NM_000594.2	TNFA, TNFSF2, DIF, TNF-alpha	AGCAACAAGACCACCACTTCGAAACCTGGGATTCAGGAATGTGTGGCCTGCACAGTGAAGTGCTGGCAACCACTAAGAATTCAAACTGGGGCCTCCAGAA	tumor necrosis factor
TNFAIP3	NM_006290.2	A20, OTUD7C	CAAAGCCCTCATCGACAGAAACATCCAGGCCACCCTGGAAAGCCAGAAGAAACTCAACTGGTGTCGAGAAGTCCGGAAGCTTGTGGCGCTGAAAACGAAC	tumor necrosis factor, alpha-induced protein 3
TNFAIP6	NM_007115.2	TSG6, TSG-6	GAATTTGAAGGCGGCCATCTCGCAACTTACAAGCAGCTAGAGGCAGCCAGAAAAATTGGATTTCATGTCTGTGCTGCTGGATGGATGGCTAAGGGCAGAG	tumor necrosis factor, alpha-induced protein 6
TNFRSF10C	NM_003841.3	DcR1, TRAILR3, LIT, TRID, CD263	CCGGAAGTGTAGCAGGTGCCCTAGTGGGGAAGTCCAAGTCAGTAATTGTACGTCCTGGGATGATATCCAGTGTGTTGAAGAATTTGGTGCCAATGCCACT	tumor necrosis factor receptor superfamily, member 10c, decoy without an intracellular domain
TNFRSF11A	NM_003839.2	RANK, CD265	CAAACCTTGCCTTGCAGGCTACTTCTCTGATGCCTTTTCCTCCACGGACAAATGCAGACCCTGGACCAACTGTACCTTCCTTGGAAAGAGAGTAGAACAT	tumor necrosis factor receptor superfamily, member 11a, NFKB activator
TNFRSF13B	NM_012452.2	TACI, CD267	TGCAAAACCATTTGCAACCATCAGAGCCAGCGCACCTGTGCAGCCTTCTGCAGGTCACTCAGCTGCCGCAAGGAGCAAGGCAAGTTCTATGACCATCTCC	tumor necrosis factor receptor superfamily, member 13B
TNFRSF13C	NM_052945.3	BAFFR, CD268	TCAGACCTCACCATCTTTGACAGCCCTTGAAGGTGGTAGCCCAGCTCCTGTTCCTGTGCCTTCAAAAGGCTGGGGCACTATGAGTAAAAGACCGCTTTTA	tumor necrosis factor receptor superfamily, member 13C
TNFRSF14	NM_003820.2	HVEM, ATAR, TR2, LIGHTR, HVEA, CD270	CTCAGGGAGCCTCGTCATCGTCATTGTTTGCTCCACAGTTGGCCTAATCATATGTGTGAAAAGAAGAAAGCCAAGGGGTGATGTAGTCAAGGTGATCGTC	tumor necrosis factor receptor superfamily, member 14
TNFRSF17	NM_001192.2	BCMA, BCM, CD269	TCTGACCATTGCTTTCCACTCCCAGCTATGGAGGAAGGCGCAACCATTCTTGTCACCACGAAAACGAATGACTATTGCAAGAGCCTGCCAGCTGCTTTGA	tumor necrosis factor receptor superfamily, member 17
TNFRSF1B	NM_001066.2	TNFR2, TNFBR, TNFR80, TNF-R75, TNF-R-II, p75, CD120b	CCCAGCTGAAGGGAGCACTGGCGACTTCGCTCTTCCAGTTGGACTGATTGTGGGTGTGACAGCCTTGGGTCTACTAATAATAGGAGTGGTGAACTGTGTC	tumor necrosis factor receptor superfamily, member 1B
TNFRSF4	NM_003327.2	TXGP1L, ACT35, OX40, CD134	CCGTGCGGGCCGGGCTTCTACAACGACGTGGTCAGCTCCAAGCCGTGCAAGCCCTGCACGTGGTGTAACCTCAGAAGTGGGAGTGAGCGGAAGCAGCTGT	tumor necrosis factor receptor superfamily, member 4
TNFRSF8	NM_152942.2	CD30, D1S166E, KI-1	GAAACCGCTCAGATGTTTTGGGGAAAGTTGGAGAAGCCGTGGCCTTGCGAGAGGTGGTTACACCAGAACCTGGACATTGGCCAGAAGAAGCTTAAGTGGG	tumor necrosis factor receptor superfamily, member 8
TNFRSF9	NM_001561.4	ILA, CD137, 4-1BB	AGATTTGCAGTCCCTGTCCTCCAAATAGTTTCTCCAGCGCAGGTGGACAAAGGACCTGTGACATATGCAGGCAGTGTAAAGGTGTTTTCAGGACCAGGAA	tumor necrosis factor receptor superfamily, member 9
TNFSF10	NM_003810.2	TRAIL, Apo-2L, TL2, CD253	GGGGGGACCCAGCCTGGGACAGACCTGCGTGCTGATCGTGATCTTCACAGTGCTCCTGCAGTCTCTCTGTGTGGCTGTAACTTACGTGTACTTTACCAAC	tumor necrosis factor (ligand) superfamily, member 10
TNFSF11	NM_003701.2	TRANCE, RANKL, OPGL, ODF, CD254	TACCTGATTCATGTAGGAGAATTAAACAGGCCTTTCAAGGAGCTGTGCAAAAGGAATTACAACATATCGTTGGATCACAGCACATCAGAGCAGAGAAAGC	tumor necrosis factor (ligand) superfamily, member 11
TNFSF12	NM_003809.2	TWEAK, DR3LG, APO3L	GCGCCTTTCCTGAACCGACTAGTTCGGCCTCGCAGAAGTGCACCTAAAGGCCGGAAAACACGGGCTCGAAGAGCGATCGCAGCCCATTATGAAGTTCATC	tumor necrosis factor (ligand) superfamily, member 12
TNFSF13B	NM_006573.4	TNFSF20, BAFF, THANK, BLYS, TALL-1, TALL1, CD257	CTTGGAGGAAGGACACAATTCAAAGGGGCAGTAAGGATTTTGTAAAACGTGGCATCCATAATTTACTATGGAGCAAGTGCCCACATCTCTAGGACATTAA	tumor necrosis factor (ligand) superfamily, member 13b
TNFSF15	NM_001204344.1	TL1, VEGI, TL1A, VEGI192A, MGC129934, MGC129935	GGTGACCCTTGGCCCGTATTATAAATGCTTCCTATCCTGGGAGACCTCATGGATGAGTCTGAGAGGAAATTTGGCACCAAAATCACTCTCACTCTGGTTT	tumor necrosis factor (ligand) superfamily, member 15
TNFSF4	NM_003326.2	TXGP1, OX-40L, gp34, CD252	GAAGGTCAGGTCTGTCAACTCCTTGATGGTGGCCTCTCTGACTTACAAAGACAAAGTCTACTTGAATGTGACCACTGACAATACCTCCCTGGATGACTTC	tumor necrosis factor (ligand) superfamily, member 4
TNFSF8	NM_001244.3	CD30LG, CD153	CCCTCAAAGGAGGAAATTGCTCAGAAGACCTCTTATGTATCCTGAAAAGGGCTCCATTCAAGAAGTCATGGGCCTACCTCCAAGTGGCAAAGCATCTAAA	tumor necrosis factor (ligand) superfamily, member 8
TOLLIP	NM_019009.2	IL-1RAcPIP	GGAATAGAGCTGTTGATTTAAGGCACACACAATCCCTCACACTGTGGGTTTTTTTTAGAACTTCCCAGACGAAAACTCACGCCCTTGCCCTAACGCGCTT	toll interacting protein
TP53	NM_000546.2	p53, LFS1	GGGGAGCAGGGCTCACTCCAGCCACCTGAAGTCCAAAAAGGGTCAGTCTACCTCCCGCCATAAAAAACTCATGTTCAAGACAGAAGGGCCTGACTCAGAC	tumor protein p53
TRAF1	NM_005658.3	EBI6	CGAGTGATGGGTCTAGGCCCTGAAACTGATGTCCTAGCAATAACCTCTTGATCCCTACTCACCGAGTGTTGAGCCCAAGGGGGGATTTGTAGAACAAGCC	TNF receptor-associated factor 1
TRAF2	NM_021138.3	TRAP3	GTGGCCCTTCAACCAGAAGGTGACCTTAATGCTGCTCGACCAGAATAACCGGGAGCACGTGATTGACGCCTTCAGGCCCGACGTGACTTCATCCTCTTTT	TNF receptor-associated factor 2
TRAF3	NM_145725.1	CAP-1, CD40bp, CRAF1, LAP1	ATATGATGCCCTGCTTCCTTGGCCGTTTAAGCAGAAAGTGACACTCATGCTGATGGATCAGGGGTCCTCTCGACGTCATTTGGGAGATGCATTCAAGCCC	TNF receptor-associated factor 3
TRAF4	NM_004295.2	CART1, MLN62, RNF83	GCCAAGCCCAACCTTGAGTGCTTCAGCCCAGCCTTCTACACACATAAGTATGGTTACAAGCTGCAGGTGTCTGCATTCCTCAATGGCAATGGCAGTGGTG	TNF receptor-associated factor 4
TRAF5	NM_004619.3	RNF84	CTGGATGTAATGCCAAGGTTATTCTGGGCCGGTACCAGGATCACCTTCAGCAGTGCTTATTTCAACCTGTGCAGTGTTCTAATGAGAAGTGCCGGGAGCC	TNF receptor-associated factor 5
TRAF6	NM_145803.1	RNF85	CACCCGCTTTGACATGGGTAGCCTTCGGAGGGAGGGTTTTCAGCCACGAAGTACTGATGCAGGGGTATAGCTTGCCCTCACTTGCTCAAAAACAACTACC	TNF receptor-associated factor 6
TYK2	NM_003331.3	JTK1	TCATCGCTGACAGCTGAGGAAGTCTGCATCCACATTGCACATAAAGTTGGTATCACTCCTCCTTGCTTCAATCTCTTTGCCCTCTTCGATGCTCAGGCCC	tyrosine kinase 2
UBE2L3	NM_198157.1	UBCH7	GTTGTGGTTCCCTTTCTTCCCTACCCTTGCCACTCCCACTTTCTGGCACCGAGTTTATTTTTCACTTACTTACTTCCCCAGACCCCGGGCTCGCCTCCAC	ubiquitin-conjugating enzyme E2L 3
VCAM1	NM_001078.3	CD106	CAGACTTCCCTGAATGTATTGAACTTGGAAAGAAATGCCCATCTATGTCCCTTGCTGTGAGCAAGAAGTCAAAGTAAAACTTGCTGCCTGAAGAACAGTA	vascular cell adhesion molecule 1
VTN	NM_000638.3	VN	ACGTGGCTGTCCTTGTTCTCCAGTGAGGAGAGCAACTTGGGAGCCAACAACTATGATGACTACAGGATGGACTGGCTTGTGCCTGCCACCTGTGAACCCA	vitronectin
XBP1	NM_005080.2	XBP2	GGAGTTAAGACAGCGCTTGGGGATGGATGCCCTGGTTGCTGAAGAGGAGGCGGAAGCCAAGGGGAATGAAGTGAGGCCAGTGGCCGGGTCTGCTGAGTCC	X-box binding protein 1
XCL1	NM_002995.1	LTN, SCYC1, LPTN, ATAC, SCM-1a, SCM-1, lymphotactin	GTACCTCTCTTTGATGGTAACCATAATGGAAGAGATTCTGGCTAGTGTCTATCAGAGGTGAAAGCTATATCAATCTCTCTTAGAGTCCAGCTTGTAATGG	chemokine (C motif) ligand 1
XCR1	NM_005283.2	GPR5, CCXCR1	GTCCTCCATCCTCGACACCATCTTCCACAAGGTGCTTTCTTCGGGCTGTGATTATTCCGAACTCACGTGGTACCTCACCTCCGTCTACCAGCACAACCTC	chemokine (C motif) receptor 1
ZAP70	NM_001079.3	SRK, ZAP-70, STD	GGAGCTCAAGGACAAGAAGCTCTTCCTGAAGCGCGATAACCTCCTCATAGCTGACATTGAACTTGGCTGCGGCAACTTTGGCTCAGTGCGCCAGGGCGTG	zeta-chain (TCR) associated protein kinase 70kDa
ZBTB16	NM_006006.4	ZNF145, PLZF	TCCTGGATAGTTTGCGGCTGAGAATGCACTTACTGGCTCATTCAGCGGGTGCCAAAGCCTTTGTCTGTGATCAGTGCGGTGCACAGTTTTCGAAGGAGGA	zinc finger and BTB domain containing 16
ZEB1	NM_001128128.1	TCF8, PPCD3, BZP, ZEB, AREB6, NIL-2-A, Zfhep, Zfhx1a	TTACAAAATGGGGTTTTCACTGGTGGTGGCCCATTACAGGCAACCAGTTCTCCTCAGGGCATGGTGCAAGCTGTTGTTCTGCCAACAGTTGGTTTGGTGT	zinc finger E-box binding homeobox 1
Internal Reference Genes
ABCF1	NM_001090.2	ABC50, EST123147	GATGTCCTCCCGCCAAGCCATGTTAGAAAATGCATCTGACATCAAGCTGGAGAAGTTCAGCATCTCCGCTCATGGCAAGGAGCTGTTCGTCAATGCAGAC	ATP-binding cassette, sub-family F (GCN20), member 1
ALAS1	NM_000688.4	ALAS3, ALAS	GGGGATCGGGATGGAGTCATGCCAAAAATGGACATCATTTCTGGAACACTTGGCAAAGCCTTTGGTTGTGTTGGAGGGTACATCGCCAGCACGAGTTCTC	aminolevulinate, delta-, synthase 1
EEF1G	NM_001404.4	EF1G	CTTCATGAGCTGCAATCTCATCACTGGAATGTTCCAGCGACTGGACAAGCTGAGGAAGAATGCCTTCGCCAGTGTCATCCTTTTTGGAACCAACAATAGC	eukaryotic translation elongation factor 1 gamma
G6PD	NM_000402.2	G6PD1	ACAACATCGCCTGCGTTATCCTCACCTTCAAGGAGCCCTTTGGCACTGAGGGTCGCGGGGGCTATTTCGATGAATTTGGGATCATCCGGGACGTGATGCA	glucose-6-phosphate dehydrogenase
GAPDH	NM_002046.3	GAPD	CACTCCTCCACCTTTGACGCTGGGGCTGGCATTGCCCTCAACGACCACTTTGTCAAGCTCATTTCCTGGTATGACAACGAATTTGGCTACAGCAACAGGG	glyceraldehyde-3-phosphate dehydrogenase
GUSB	NM_000181.1		CGGTCGTGATGTGGTCTGTGGCCAACGAGCCTGCGTCCCACCTAGAATCTGCTGGCTACTACTTGAAGATGGTGATCGCTCACACCAAATCCTTGGACCC	glucuronidase, beta
HPRT1	NM_000194.1	HPRT, HGPRT	TGTGATGAAGGAGATGGGAGGCCATCACATTGTAGCCCTCTGTGTGCTCAAGGGGGGCTATAAATTCTTTGCTGACCTGCTGGATTACATCAAAGCACTG	hypoxanthine phosphoribosyltransferase 1
OAZ1	NM_004152.2	OAZ, AZI, MGC138338	GGTGGGCGAGGGAATAGTCAGAGGGATCACAATCTTTCAGCTAACTTATTCTACTCCGATGATCGGCTGAATGTAACAGAGGAACTAACGTCCAACGACA	ornithine decarboxylase antizyme 1
POLR1B	NM_019014.3	Rpo1-2, FLJ21921, FLJ10816, RPA2	GGAGAACTCGGCCTTAGAATACTTTGGTGAGATGTTAAAGGCTGCTGGCTACAATTTCTATGGCACCGAGAGGTTATATAGTGGCATCAGTGGGCTAGAA	polymerase (RNA) I polypeptide B, 128kDa
POLR2A	NM_000937.2	POLR2, POLRA, RPB1	TTCCAAGAAGCCAAAGACTCCTTCGCTTACTGTCTTCCTGTTGGGCCAGTCCGCTCGAGATGCTGAGAGAGCCAAGGATATTCTGTGCCGTCTGGAGCAT	polymerase (RNA) II (DNA directed) polypeptide A, 220kDa
PPIA	NM_021130.2	CYPA	GGAATATTGAAAATGTAGGCAGCAACTGGGCATGGTGGCTCACTGTCTGTAATGTATTACCTGAGGCAGAAGACCACCT	peptidylprolyl isomerase A (cyclophilin A)
SDHA	NM_004168.1	FP, SDHF	TGGAGGGGCAGGCTTGCGAGCTGCATTTGGCCTTTCTGAGGCAGGGTTTAATACAGCATGTGTTACCAAGCTGTTTCCTACCAGGTCACACACTGTTGCA	succinate dehydrogenase complex, subunit A, flavoprotein (Fp)
TBP	NM_001172085.1	GTF2D1, SCA17, TFIID	ACAGTGAATCTTGGTTGTAAACTTGACCTAAAGACCATTGCACTTCGTGCCCGAAACGCCGAATATAATCCCAAGCGGTTTGCTGCGGTAATCATGAGGA	TATA box binding protein
TUBB	NM_178014.2	OK/SW-cl.56, MGC16435, M40, Tubb5	TGGTGGATCTAGAACCTGGGACCATGGACTCTGTTCGCTCAGGTCCTTTTGGCCAGATCTTTAGACCAGACAACTTTGTATTTGGTCAGTCTGGGGCAGG	tubulin, beta
RPL19	NM_000981.3	FLJ27452, MGC71997, DKFZp779D216, L19	CCAATGCCCGAATGCCAGAGAAGGTCACATGGATGAGGAGAATGAGGATTTTGCGCCGGCTGCTCAGAAGATACCGTGAATCTAAGAAGATCGATCGCCA	ribosomal protein L19
© 2013-2021 NanoString Technologies, all rights reserved			FOR RESEARCH USE ONLY. NOT FOR USE IN DIAGNOSTIC PROCEDURES.		LBL-C0269-03

## Sheet: PanCancer Panel List
nCounter® PanCancer Progression Panel - Gene and Probe Details
Gene Name	Accession	Alias / Previous Symbol	Target Sequence	Official Full Name	Other targets or Isoform Information	HUGO name if different
AAMP	NM_001087.3		GGGGTGAAGATGACAAAGCCTTCGTATGGCGGCTCAGCGATGGGGAGCTGCTCTTTGAGTGTGCAGGCCATAAAGACTCTGTGACTTGTGCTGGTTTCAG	angio associated migratory cell protein
ABI3BP	NM_015429.3	ABI family, member 3 (NESH) binding protein	TATGATTCTAATCAAGCTGTATGTAGAGACTGAATGTGAAGTCAAGTCTGAGCACAAAAAGATAATGCACGATGAGATTGCCTACCATTTTATAGGATAT	ABI family member 3 binding protein
ACHE	NM_000665.3	YT;acetylcholinesterase (YT blood group),acetylcholinesterase (Yt blood group)	CGACCAGCGCAGGTCCTGGTGAACCACGAATGGCACGTGCTGCCTCAAGAAAGCGTCTTCCGGTTCTCCTTCGTGCCTGTGGTAGATGGAGACTTCCTCA	acetylcholinesterase (Cartwright blood group)
ACTG2	NM_001615.3	ACTL3,ACTA3	TTATTGGCATGGAGTCCGCTGGAATTCATGAGACAACCTACAATTCCATCATGAAGTGTGACATTGACATCCGTAAGGACTTATATGCCAACAATGTCCT	actin, gamma 2, smooth muscle, enteric
ACVR1	NM_001105.2	ACVRLK2;activin A receptor, type I	AGATATGAGGAAGGTAGTCTGTGTGGATCAACAAAGGCCAAACATACCCAACAGATGGTTCTCAGACCCGACATTAACCTCTCTGGCCAAGCTAATGAAA	activin A receptor type 1
ACVR1C	NM_145259.2	activin A receptor, type IC	GGAATTTTGCCACCATGTGACTTATTGGGGCAGAGAAAACTCAGGGTTGTCTTTGAGTCTGCACAAAAGCACCAGGGAACCTGCTTAGCAAATCGTCTGA	activin A receptor type 1C
ACVRL1	NM_000020.1	ACVRLK1,ORW2;activin A receptor type II-like 1,activin A receptor type IL	TCTGCCCGACTCACCGCGCTGCGGATCAAGAAGACACTACAAAAAATTAGCAACAGTCCAGAGAAGCCTAAAGTGATTCAATAGCCCAGGAGCACCTGAT	activin A receptor like type 1
ADAM15	NM_207195.1	a disintegrin and metalloproteinase domain 15 (metargidin)	CCTATGGCTGCTTTCTGCGGAAATATGTTTGTGGAGCCGGGCGAGCAGTGTGACTGTGGCTTCCTGGATGACTGCGTCGATCCCTGCTGTGATTCTTTGA	ADAM metallopeptidase domain 15
ADAM17	NM_003183.4	TACE;tumor necrosis factor, alpha, converting enzyme	AGAACGCAGCAATAAAGTTTGTGGGAACTCGAGGGTGGATGAAGGAGAAGAGTGTGATCCTGGCATCATGTATCTGAACAACGACACCTGCTGCAACAGC	ADAM metallopeptidase domain 17
ADAM28	NM_014265.4	a disintegrin and metalloproteinase domain 28	AGGGGGAGTGTTCTCTCAAGAAGAAAGCGTCATGATATTGCTCAGTTAATCACAGCAACAGAACTTGCTGGAACGACTGTGGGTCTTGCATTTATGTCTA	ADAM metallopeptidase domain 28
ADAM8	NM_001109.4	a disintegrin and metalloproteinase domain 8	TGCTGGAGGTGGTGAATCACGTGGACAAGCTATATCAGAAACTCAACTTCCGTGTGGTCCTGGTGGGCCTGGAGATTTGGAATAGTCAGGACAGGTTCCA	ADAM metallopeptidase domain 8
ADAM9	NM_001005845.1	CORD9;a disintegrin and metalloproteinase domain 9 (meltrin gamma),cone rod dystrophy 9	TGTCTTGCCACAGACCCGGTATGTGGAGCTGTTCATTGTCGTAGACAAGGAAAGGTATGACATGATGGGAAGAAATCAGACTGCTGTGAGAGAAGAGATG	ADAM metallopeptidase domain 9
ADAMTS1	NM_006988.3	a disintegrin-like and metalloprotease (reprolysin type) with thrombospondin type 1 motif, 1	GGTGTTGTCTTGAGGTACAGCGGCTCCTCTGCGGCATTGGAAAGAATTCGCAGCTTTAGCCCTCTCAAAGAGCCCTTGACCATCCAGGTTCTTACTGTGG	ADAM metallopeptidase with thrombospondin type 1 motif 1
ADAMTS12	NM_030955.2	a disintegrin-like and metalloprotease (reprolysin type) with thrombospondin type 1 motif, 12	CAGAGGCACCAACATTTCGGCAGATGCAGTGCAGTGAATTTGACACTGTTCCCTACAAGAATGAACTCTACCACTGGTTTCCCATTTTTAACCCAGCACA	ADAM metallopeptidase with thrombospondin type 1 motif 12
ADAMTS8	NM_007037.4	a disintegrin-like and metalloprotease (reprolysin type) with thrombospondin type 1 motif, 8	AGTTGTTCTGCCGAGCCCGGGGGAGGAGCGAGTTCAAAGTGTTCGAGGCCAAGGTGATTGATGGCACCCTGTGTGGGCCAGAAACACTGGCCATCTGTGT	ADAM metallopeptidase with thrombospondin type 1 motif 8
ADAP1	NM_006869.2	CENTA1;centaurin, alpha 1	GTGAGGGTTTTCTCTGGAAGCGTGGCCGGGACAACGGGCAGTTTTTGAGCCGGAAGTTTGTGCTGACAGAACGAGAGGGTGCTCTGAAGTATTTCAACAG	ArfGAP with dual PH domains 1
ADD1	NM_001119.4	adducin 1 (alpha)	ACGGTGTAAATTGGCAGCGTTTTATAGACTAGCAGATCTCTTTGGGTGGTCTCAGCTTATCTACAATCATATCACAACCAGAGTGAACTCCGAGCAGGAA	adducin 1
ADM2	NM_001253845.1		CCTGCAGCAACAATACCTGCACGGCTTTGCACACGTAAACCTAGGCTGGTCTACACGCAGTGCTGGTACGTCAAGGAGCCTAAACACCCTGAAATTGTGA	adrenomedullin 2
ADRA2B	NM_000682.4	ADRA2L1,ADRA2RL1;adrenergic, alpha-2B-, receptor	GCCTGGCTTCAACATTGGGCCAGTAGGCATCTTAGCTTGGCAGGTGTCGGGGGAATGGGCCAGATGGACCTGCTAGATTTGGAAGGGCACCGAGGGAGTT	adrenoceptor alpha 2B
AEBP1	NM_001129.3	AE-binding protein 1	CACGCGGAGGGCTACACCCCGAGCGCCAAGACCTGCAATGTTGACTATGACATCGGGGCCACTCAGTGCAACTTCATCCTGGCTCGCTCCAACTGGAAGC	AE binding protein 1
AGGF1	NM_018046.3		CTTCTGGCCTCTGGTTTTCCGACTGCTTATCCGACGCTCCTCCCTCTGTCTCTGTAGCTGGAGAAGGTAGTTTCCAGGAAAGTTTTCCGGTTTGCAGGCC	angiogenic factor with G-patch and FHA domains 1
AGR2	NM_006408.3	anterior gradient 2 homolog (Xenopus laevis)	GACCCATCTCTGACAGTTAGAGCCGATATCACTGGAAGATATTCAAATCGTCTCTATGCTTACGAACCTGCAGATACAGCTCTGTTGCTTGACAACATGA	anterior gradient 2, protein disulphide isomerase family member
AGRN	NM_198576.2	AGRIN;agrin proteoglycan	TGTGCGGAGATGCGCTGTGAGTTCGGTGCGCGGTGCGTGGAGGAGTCTGGCTCAGCCCACTGTGTCTGCCCGATGCTCACCTGTCCAGAGGCCAACGCTA	agrin
AGT	NM_000029.3	SERPINA8;serpin peptidase inhibitor, clade A, member 8	CCCGCCATTCTGCACACCGAGCTGAACCTGCAAAAATTGAGCAATGACCGCATCAGGGTGGGGGAGGTGCTGAACAGCATTTTTTTTGAGCTTGAAGCGG	angiotensinogen
AHNAK	NM_001620.2	AHNAK nucleoprotein (desmoyokin)	CCCAAGATCTCCATGCCTGATATTGACTTAAACCTGAAAGGACCCAAAGTGAAGGGCGATGTGGATGTTACCCTTCCTAAAGTGGAAGGTGACCTCAAGG	AHNAK nucleoprotein
AKAP12	NM_005100.3	A kinase (PRKA) anchor protein (gravin) 12,A kinase (PRKA) anchor protein 12	TCACAGATGATGGGCAGGAGGAGACACCCGAAATAATCGAACAGATTCCTTCTTCAGAAAGCAATTTAGAAGAGCTAACACAACCCACTGAGTCCCAGGC	A-kinase anchoring protein 12
AKAP2	NM_001004065.4	PRKA2;A kinase (PRKA) anchor protein 2	CCTTTAAAACTGCCAAGGGAGCTCTAACTTGAAGCCACATCCTACAGATGGCAGCCCAAATAGCACATGGGCAATTGGCACCATCTTTATATGGTTGAGT	A-kinase anchoring protein 2
AKT1	NM_005163.2	v-akt murine thymoma viral oncogene homolog 1	TTCTTTGCCGGTATCGTGTGGCAGCACGTGTACGAGAAGAAGCTCAGCCCACCCTTCAAGCCCCAGGTCACGTCGGAGACTGACACCAGGTATTTTGATG	AKT serine/threonine kinase 1
AKT2	NM_001626.2	v-akt murine thymoma viral oncogene homolog 2	CGTGGTCCAGAAGAAGCTCCTGCCACCCTTCAAACCTCAGGTCACGTCCGAGGTCGACACAAGGTACTTCGATGATGAATTTACCGCCCAGTCCATCACA	AKT serine/threonine kinase 2
AKT3	NM_005465.4	v-akt murine thymoma viral oncogene homolog 3	GCCAGTTAATGAAAACAGAACGACCAAAGCCAAACACATTTATAATCAGATGTCTCCAGTGGACTACTGTTATAGAGAGAACATTTCATGTAGATACTCC	AKT serine/threonine kinase 3
ALB	NM_000477.5		TCTTACCAAAGTCCACACGGAATGCTGCCATGGAGATCTGCTTGAATGTGCTGATGACAGGGCGGACCTTGCCAAGTATATCTGTGAAAATCAAGATTCG	albumin
ALDOA	NM_184041.2	aldolase A, fructose-bisphosphate	AGGCTGGCTTGCCCGCGCTCTTTCTTCCCTCGTGACAGTGGTGTGTGGTGTCGTCTGTGAATGCTAAGTCCATCACCCTTTCCGGCACACTGCCAAATAA	aldolase, fructose-bisphosphate A
ALOX5	NM_000698.2		GTCAAGATCAGCAACACTATTTCTGAGCGGGTCATGAATCACTGGCAGGAAGACCTGATGTTTGGCTACCAGTTCCTGAATGGCTGCAACCCTGTGTTGA	arachidonate 5-lipoxygenase
AMH	NM_000479.3		GACCTCCGCGCCGAGCGCTCCGTACTCATCCCCGAGACCTACCAGGCCAACAATTGCCAGGGCGTGTGCGGCTGGCCTCAGTCCGACCGCAACCCGCGCT	anti-Mullerian hormone
ANG	NM_001145.4	angiogenin, ribonuclease, RNase A family, 5	AGTACCGAGCCACAGCGGGGTTCAGAAACGTTGTTGTTGCTTGTGAAAATGGCTTACCTGTCCACTTGGATCAGTCAATTTTCCGTCGTCCGTAACCAGC	angiogenin
ANGPT1	NM_001146.3		GTGGTAGTTATGTGAAGTCACCAAGGTTCTTGACCGTGAATCTGGAGCCGTTTGAGTTCACAAGAGTCTCTACTTGGGGTGACAGTGCTCACGTGGCTCG	angiopoietin 1
ANGPT2	NM_001147.2		TCGCTCAAGGCCACAACCATGATGATCCGACCAGCAGATTTCTAAACATCCCAGTCCACCTGAGGAACTGTCTCGAACTATTTTCAAAGACTTAAGCCCA	angiopoietin 2
ANGPTL2	NM_012098.2	angiopoietin-like 2	TGGCTGCCATGGGAGCTGTTGCAGGCCAGGAGGACGGTTTTGAGGGCACTGAGGAGGGCTCGCCAAGAGAGTTCATTTACCTAAACAGGTACAAGCGGGC	angiopoietin like 2
ANGPTL4	NR_104213.1	angiopoietin-like 4	AGAGCCGGGTGGACCCTGAGGTCCTTCACAGCCTGCAGACACAACTCAAGGCTCAGAACAGCAGGATCCAGCAACTCTTCCACAAGGTGGCCCAGCAGCA	angiopoietin like 4
ANPEP	NM_001150.1	CD13,PEPN;alanyl (membrane) aminopeptidase	CCGGACTTAATCCGGAAGCAGGACGCCACCTCTACCATCATCAGCATTACCAACAACGTCATTGGGCAAGGTCTGGTCTGGGACTTTGTCCAGAGCAACT	alanyl aminopeptidase, membrane
ANXA2P2	NR_003573.1	ANX2P2,ANX2L2,LPC2B	ACACTAAGGGCGACTACCAGAAAGCGCTGCTGTACCTGTGTGGTGGAGACGACTGAAGCCCGACACAGCCTGAGCGTCCAGAAATGGTGCTCACCATGCT	annexin A2 pseudogene 2	ANXA2 (NM_001002858;NM_001136015;NM_004039;NM_001002857)
AP1M2	NM_005498.4	adaptor-related protein complex 1, mu 2 subunit,adaptor-related protein complex 1 mu 2 subunit	GCCACCATGTCCGCCTCGGCTGTCTTCATTCTGGACGTTAAGGGCAAGCCATTGATCAGCCGCAACTACAAGGGCGATGTGGCCATGAGCAAGATTGAGC	adaptor related protein complex 1 mu 2 subunit
APC	NM_000038.3	adenomatosis polyposis coli,adenomatous polyposis coli	AAACAGCCACCACTTCTCCTAGAGGAGCCAAGCCATCTGTGAAATCAGAATTAAGCCCTGTTGCCAGGCAGACATCCCAAATAGGTGGGTCAAGTAAAGC	APC, WNT signaling pathway regulator
APOD	NM_001647.3		TGGAACTGTGAATCAAATCGAAGGTGAAGCCACCCCAGTTAACCTCACAGAGCCTGCCAAGCTGGAAGTTAAGTTTTCCTGGTTTATGCCATCGGCACCG	apolipoprotein D
APOE	NM_000041.2	AD2;Alzheimer disease 2 (APOE*E4-associated, late onset)	GGGCTGCGTTGCTGGTCACATTCCTGGCAGGATGCCAGGCCAAGGTGGAGCAAGCGGTGGAGACAGAGCCGGAGCCCGAGCTGCGCCAGCAGACCGAGTG	apolipoprotein E
APOH	NM_000042.2	B2G1;apolipoprotein H (beta-2-glycoprotein I)	TGCCACAACATGCGATGTTTGGAAATGATACAATTACCTGCACGACACATGGAAATTGGACTAAATTACCAGAATGCAGGGAAGTAAAATGCCCATTCCC	apolipoprotein H
AQP1	NM_198098.1	CO;Colton blood group,aquaporin 1 (channel-forming integral protein, 28kDa),aquaporin 1 (channel-forming integral protein, 28kDa, CO blood group),aquaporin 1	CTGGGATTCTACCGTAATTGCTTTGTGCCTTTGGGCACGGCCCTCCTTCTTTTCCTAACATGCACCTTGCTCCCAATGGTGCTTGGAGGGGGAAGAGATC	aquaporin 1 (Colton blood group)
ARAP2	NM_015230.2	CENTD1;centaurin, delta 1	ATCACTGGCACCTGTGTTGTGATAGTTCACGAACTCAGACGGAGTGGATGACCAGTATCTTTATTGCCCAGCATGAATATGATATATGGCCACCAGCTGG	ArfGAP with RhoGAP domain, ankyrin repeat and PH domain 2
AREG	NM_001657.2	amphiregulin B, AREGB, schwannoma-derived growth factor, SDGF	ACAAGACGGAAAGTGAAAATACTTCAGATAAACCCAAAAGAAAGAAAAAGGGAGGCAAAAATGGAAAAAATAGAAGAAACAGAAAGAAGAAAAATCCATG	amphiregulin
ARHGAP32	NM_001142685.1		CTCCGTTCAGCTAAAAGTGAGGAGTCTCTTACATCTCTCCATGCAGTTGATGGTGATTCTAAGCTCTTCCGACCCAGAAGACCCAGATCTTCCAGTGATG	Rho GTPase activating protein 32
ARHGDIB	NM_001175.4	RAP1GN1,GDIA2,GDID4;Rho GDP dissociation inhibitor (GDI) beta	ATGCATCTTTTCCCACCCTGTCACTCAACGTGGTCCCTAGAACAAGAGGCTTAAAACCGGGCTTTCACCCAACCTGCTCCCTCTGATCCTCCATCAGGGC	Rho GDP dissociation inhibitor beta
ASPN	NM_017680.3	asporin (LRR class 1)	ATAACTTCTACTTTTAGGAGGACTACTCTCTTCTGACAGTCCTAGACTGGTCTTCTACACTAAGACACCATGAAGGAGTATGTGCTCCTATTATTCCTGG	asporin
ATPIF1	NM_178190.2	ATPIF1;ATPase inhibitory factor 1	CCGTGTCCTTGTAGAGCACAGAGTAGAGAACAACTGGCAGCTTTGAAAAAACACCATGAAGAAGAAATCGTTCATCATAAGAAGGAGATTGAGCGTCTGC	ATP synthase inhibitory factor subunit 1		ATP5IF1
B3GNT3	NM_014256.3	TMEM3	TGCACCTGCAGTGGTTTAATGGCAGATAAGCTCCGTCTGCAGTTCCAGGCCAGCCAGAAACTCCTGTGTCCACATAGAGCTGACGTGAGAAATATCTTTC	UDP-GlcNAc:betaGal beta-1,3-N-acetylglucosaminyltransferase 3
BAD	NM_004322.3		AGGGAGGGCTGACCCAGATTCCCTTCCGGTGCGTGTGAAGCCACGGAAGGCTTGGTCCCATCGGAAGTTTTGGGTTTTCCGCCCACAGCCGCCGGAAGTG	BCL2 associated agonist of cell death
BAG2	NM_004282.3		AAGAGTCATTTAATGTCGCTCTACAGTGCATGTTCATCTGAGGTGCCACATGGGCCAGTTGATCAGAAGTTTCAATCCATAGTAATTGGCTGTGCTCTTG	BCL2 associated athanogene 2
BAI1	NM_001702.1	BAI1-associated protein 2	CTGTGCTCGCCGTCACCGACCGCCGCTCCGCCCTCTTCCAGATCCTCTTCGCTGTCTTCGACTCGCTGGAGGGCTTCGTCATCGTCATGGTGCACTGTAT	BAI1 associated protein 2		ADGRB1
BAI3	NM_001704.1	BAI3;brain-specific angiogenesis inhibitor 3	TTTATGGCACAAACTGGTGAATCTGGTGTGGAAGAGTGGTCCCAGTGGAGCACATGTTCGGTTACTTGTGGTCAAGGGTCGCAGGTGCGAACCAGAACTT	adhesion G protein-coupled receptor B3		ADGRB3
BCAS1	NM_003657.2		AGCAGGTCACCTAGTTGGGTCAGAAGAGTCGATGATCACCAAGCAGGAAAGGGAGGGAATAGAGGAATGTGTTCGGGTTAAGTGATGAAAATGGCAGTGG	breast carcinoma amplified sequence 1
BGN	NM_001711.3		TGTGTCTTGTGCTTCCTCAGACCTTTCTCGCTTCTGAGCTTGGTGGCCTGTTCCCTCCATCTCTCCGAACCTGGCTTCGCCTGTCCCTTTCACTCCACAC	biglycan
BICC1	NM_001080512.1	bicaudal C homolog 1 (Drosophila)	CACGGTCATCATATGTCAACATGCAGGCATTTGACTATGAACAGAAGAAGCTATTAGCCACCAAAGCTATGTTAAAGAAACCAGTGGTGACGGAGGTCAG	BicC family RNA binding protein 1
BMP4	NM_001202.3	BMP2B	TGCCTTGTTTTCTGTCAAGACACCATGATTCCTGGTAACCGAATGCTGATGGTCGTTTTATTATGCCAAGTCCTGCTAGGAGGCGCGAGCCATGCTAGTT	bone morphogenetic protein 4
BMP5	NM_021073.2		GGTCTTGTGGGAAGACAGGGACCTCAGTCAAAACAACCATTCATGGTGGCCTTCTTCAAGGCGAGTGAGGTACTTCTTCGATCCGTGAGAGCAGCCAACA	bone morphogenetic protein 5
BMP7	NM_001719.2		GACGTTCCGGATCAGCGTTTATCAGGTGCTCCAGGAGCACTTGGGCAGGGAATCGGATCTCTTCCTGCTCGACAGCCGTACCCTCTGGGCCTCGGAGGAG	bone morphogenetic protein 7
BMPER	NM_133468.4		CCCATGTCTCTGGCTTCCTCCTTCTTGACAGGTTCTGTTGCAAAATGTGAAAATGAAGGTGAAGTCCTCCAGATTCCATTTATCACAGACAACCCTTGCA	BMP binding endothelial regulator
BMPR1A	NM_004329.2	ACVRLK3;bone morphogenetic protein receptor, type IA	AAATGAAGTTGATGTGCCCTTGAATACCAGGGTGGGCACCAAACGCTACATGGCTCCCGAAGTGCTGGACGAAAGCCTGAACAAAAACCACTTCCAGCCC	bone morphogenetic protein receptor type 1A
BMPR1B	NM_001203.1	bone morphogenetic protein receptor, type IB	GTTTCACGATGATAGAAGAGGATGACTCTGGGTTGCCTGTGGTCACTTCTGGTTGCCTAGGACTAGAAGGCTCAGATTTTCAGTGTCGGGACACTCCCAT	bone morphogenetic protein receptor type 1B
BMPR2	NM_001204.5	PPH1;primary pulmonary hypertension 1,bone morphogenetic protein receptor, type II (serine/threonine kinase),bone morphogenetic protein receptor type II	AGGTTCTCGTGTCTAGGGAAAAACAGAGACCCAAGTTCCCAGAAGCCTGGAAAGAAAATAGCCTGGCAGTGAGGTCACTCAAGGAGACAATCGAAGACTG	bone morphogenetic protein receptor type 2
BNC2	NM_017637.5		TCCCTAGCCAGCTAGTATTTTCTGGGCTAAAGACTGTACAACCAGTTCCTCCATTTTATAGAAGTTTACTCACTCCAGGGGAAATGGTGAGTCCTCCAAC	basonuclin 2
BRMS1	NM_015399.3		TGCAGCGGAGCCTCAAGATTCGCATTCAGGTGGCAGGGATCTACAAGGGCTTCTGTCTGGATGTGATCAGGAATAAGTACGAATGTGAGCTGCAGGGAGC	breast cancer metastasis suppressor 1
BTG1	NM_001731.2	B-cell translocation gene 1, anti-proliferative	CAACGTGCAAATGGTAGACAGCCGAATCAGCTGTAAGGAGGAACTTCTCTTGGGCAGAACGAGCCCTTCCAAAAACTACAATATGATGACTGTATCAGGT	BTG anti-proliferation factor 1
C1S	NM_001734.2	complement component 1, s subcomponent	ACTGCACTGATTGGGGAGATTGCAAGTCCCAATTATCCCAAACCATATCCAGAGAACTCAAGGTGTGAATACCAGATCCGGTTGGAGAAAGGGTTCCAAG	complement C1s
C3	NM_000064.2	complement component 3	CATCTACCTGGACAAGGTCTCACACTCTGAGGATGACTGTCTAGCTTTCAAAGTTCACCAATACTTTAATGTAGAGCTTATCCAGCCTGGAGCAGTCAAG	complement C3
C3AR1	NM_004054.2	complement component 3a receptor 1	CAGTGTCTTCCTGCTTACTGCCATTAGCCTGGATCGCTGTCTTGTGGTATTCAAGCCAATCTGGTGTCAGAATCATCGCAATGTAGGGATGGCCTGCTCT	complement C3a receptor 1
CADM1	NM_014333.3	TSLC1,IGSF4;tumor suppressor in lung cancer 1,immunoglobulin superfamily, member 4	CTTTCATACACTAGCCTTGGCCTCTTTCCTCAGCCTTAAGAACCATCTGCCAAAAATTACTGATCCTCGCATGATGGCAGCCATAGTGCATAGCTACTAA	cell adhesion molecule 1
CALCRL	NM_005795.3	calcitonin receptor-like	ATTTGTGCTGATTCCATGGCGACCTGAAGGAAAGATTGCAGAGGAGGTATATGACTACATCATGCACATCCTTATGCACTTCCAGGGTCTTTTGGTCTCT	calcitonin receptor like receptor
CALD1	NM_004342.6		GAAGTCAAACCCTCATGACAAAGTAGGCACAAGTCTACAATAAGCTAAATCAGAATTTACAAATACAAGTGTCCCAGGTAGCATTGACTCCCGTCATTGG	caldesmon 1
CAMK2A	NM_171825.1	CAMKA;calcium/calmodulin-dependent protein kinase (CaM kinase) II alpha	TTCCCTCTTTGGAGCTTGGTTTCCCTGCCAGAGGAAACTGAGCTGGAGGAGCCTGAGGTCCTGCCTTTCATTGGCTGACACACCTCCTGTCCACTGTGTC	calcium/calmodulin dependent protein kinase II alpha
CAMK2B	NM_001220.3	CAMKB;calcium/calmodulin-dependent protein kinase (CaM kinase) II beta	TCACCAGAAGCTGGAGAGAGAGGCTCGGATCTGCCGCCTTCTGAAGCATTCCAACATCGTGCGTCTCCACGACAGCATCTCCGAGGAGGGCTTCCACTAC	calcium/calmodulin dependent protein kinase II beta
CAMK2D	NM_172127.1	CAMKD;calcium/calmodulin-dependent protein kinase (CaM kinase) II delta	TGGCTTCGACCACAACCTGCACCAGGTTCACGGACGAGTATCAGCTTTTCGAGGAGCTTGGAAAGGGGGCATTCTCAGTGGTGAGAAGATGTATGAAAAT	calcium/calmodulin dependent protein kinase II delta
CAMP	NM_004345.3		CATCATTGCCCAGGTCCTCAGCTACAAGGAAGCTGTGCTTCGTGCTATAGATGGCATCAACCAGCGGTCCTCGGATGCTAACCTCTACCGCCTCCTGGAC	cathelicidin antimicrobial peptide
CASP8	NM_001228.4	caspase 8, apoptosis-related cysteine protease,caspase 8, apoptosis-related cysteine peptidase	AGATGGACTTCAGCAGAAATCTTTATGATATTGGGGAACAACTGGACAGTGAAGATCTGGCCTCCCTCAAGTTCCTGAGCCTGGACTACATTCCGCAAAG	caspase 8
CAV1	NM_001753.3	CAV;caveolin 1, caveolae protein, 22kD,caveolin 1, caveolae protein, 22kDa	AACCGCGACCCTAAACACCTCAACGATGACGTGGTCAAGATTGACTTTGAAGATGTGATTGCAGAACCAGAAGGGACACACAGTTTTGACGGCATTTGGA	caveolin 1
CBLC	NM_012116.3	Cas-Br-M (murine) ectropic retroviral transforming sequence c,Cas-Br-M (murine) ecotropic retroviral transforming sequence c,Cbl proto-oncogene C, E3 ubiquitin protein ligase	CCATTGACCTCACCTGCAGCGGGCACGTGTCCATCTTCGAGTTCGACGTCTTCACCAGGCTCTTTCAGCCATGGCCAACACTCCTCAAGAACTGGCAGCT	Cbl proto-oncogene C
CCBE1	NM_133459.3		GTTCTTGGACAATGCATCCCAGAAGATTACGACGTTTGTGCCGAGGCTCCCTGTGAACAGCAGTGCACGGACAACTTTGGCCGAGTGCTGTGTACTTGTT	collagen and calcium binding EGF domains 1
CCDC80	NM_199511.1		TTTTGGTCTGCGCCACATAACCATTCTGAAGCTTTTAGGCGTTGGAGAGGAAGTTGGGGGAGTGTTAGAACTGTTCCCAATTAATGGGAGCTCTGTTGTT	coiled-coil domain containing 80
CCL11	NM_002986.2	SCYA11;small inducible cytokine subfamily A (Cys-Cys), member 11 (eotaxin),chemokine (C-C motif) ligand 11	TGGGTGCAGGATTCCATGAAGTATCTGGACCAAAAATCTCCAACTCCAAAGCCATAAATAATCACCATTTTTGAAACCAAACCAGAGCCTGAGTGTTGCC	C-C motif chemokine ligand 11
CCL21	NM_002989.2	SCYA21;small inducible cytokine subfamily A (Cys-Cys), member 21,chemokine (C-C motif) ligand 21	CTCAAGTACAGCCAAAGGAAGATTCCCGCCAAGGTTGTCCGCAGCTACCGGAAGCAGGAACCAAGCTTAGGCTGCTCCATCCCAGCTATCCTGTTCTTGC	C-C motif chemokine ligand 21
CCL5	NM_002985.2	D17S136E,SCYA5;small inducible cytokine A5 (RANTES),chemokine (C-C motif) ligand 5	AGTGTGTGCCAACCCAGAGAAGAAATGGGTTCGGGAGTACATCAACTCTTTGGAGATGAGCTAGGATGGAGAGTCCTTGAACCTGAACTTACACAAATTT	C-C motif chemokine ligand 5
CCL7	NM_006273.2	SCYA6,SCYA7;small inducible cytokine A7 (monocyte chemotactic protein 3),chemokine (C-C motif) ligand 7	CAGCCCCCAGGGGCTTGCTCAGCCAGTTGGGATTAATACTTCAACTACCTGCTGCTACAGATTTATCAATAAGAAAATCCCTAAGCAGAGGCTGGAGAGC	C-C motif chemokine ligand 7
CCL8	NM_005623.2	SCYA8;small inducible cytokine subfamily A (Cys-Cys), member 8 (monocyte chemotactic protein 2),chemokine (C-C motif) ligand 8	AAGGAGAGATGGGTCAGGGATTCCATGAAGCATCTGGACCAAATATTTCAAAATCTGAAGCCATGAGCCTTCATACATGGACTGAGAGTCAGAGCTTGAA	C-C motif chemokine ligand 8
CCR2	NM_001123041.2	CMKBR2;chemokine (C-C motif) receptor 2	TCTGATCTGCTTTTTCTTATTACTCTCCCATTGTGGGCTCACTCTGCTGCAAATGAGTGGGTCTTTGGGAATGCAATGTGCAAATTATTCACAGGGCTGT	C-C motif chemokine receptor 2
CCR3	NM_001837.2	CMKBR3;chemokine (C-C motif) receptor 3	CAGTGCTCTTTACCCAGAGGATACAGTATATAGCTGGAGGCATTTCCACACTCTGAGAATGACCATCTTCTGTCTCGTTCTCCCTCTGCTCGTTATGGCC	C-C motif chemokine receptor 3
CD163	NM_004244.4	CD163 antigen	CATCTGTGATTCGGACTTCTCTCTGGAAGCTGCCAGCGTTCTATGCAGGGAATTACAGTGTGGCACAGTTGTCTCTATCCTGGGGGGAGCTCACTTTGGA	CD163 molecule
CD24	NM_013230.2	CD24 antigen (small cell lung carcinoma cluster 4 antigen)	ATAGACACTCCCCGAAGTCTTTTGTTCGCATGGTCACACACTGATGCTTAGATGTTCCAGTAATCTAATATGGCCACAGTAGTCTTGATGACCAAAGTCC	CD24 molecule
CD2AP	NM_012120.2		AGCTTCCTCAGAAAACTTGCTTCATCTCACTGCAAATAGACCAAAGATGCCTGGAAGAAGGTTGCCGGGCCGTTTCAATGGTGGACATTCTCCAACTCAC	CD2 associated protein
CD34	NM_001773.2	CD34 antigen	GAGGAAACCAAAGTAACCTTTTGCACCTGCTCTCTTGTAATGATATAGCCAGAAAAACGTGTTGCCTTGAACCACTTCCCTCATCTCTCCTCCAAGACAC	CD34 molecule
CD36	NM_000072.3	CD36 antigen (collagen type I receptor, thrombospondin receptor),CD36 molecule (thrombospondin receptor)	AGCCAAGGAAAATGTAACCCAGGACGCTGAGGACAACACAGTCTCTTTCCTGCAGCCCAATGGTGCCATCTTCGAACCTTCACTATCAGTTGGAACAGAG	CD36 molecule
CD44	NM_001001392.1	MIC4,MDU2,MDU3;CD44 antigen (homing function and Indian blood group system)	ACACCATGGACAAGTTTTGGTGGCACGCAGCCTGGGGACTCTGCCTCGTGCCGCTGAGCCTGGCGCAGATCGATTTGAATATAACCTGCCGCTTTGCAGG	CD44 molecule (Indian blood group)
CD46	NM_172350.1	MIC10,MCP;antigen identified by monoclonal antibody TRA-2-10,membrane cofactor protein (CD46, trophoblast-lymphocyte cross-reactive antigen),CD46 antigen, complement regulatory protein,CD46 molecule, complement regulatory protein	TATACCTCCTCTTGCCACCCATACTATTTGTGATCGGAATCATACATGGCTACCTGTCTCAGATGACGCCTGTTATAGAGAAACATGTCCATATATACGG	CD46 molecule
CD82	NM_002231.3	ST6,KAI1;kangai 1 (suppression of tumorigenicity 6, prostate; CD82 antigen (R2 leukocyte antigen, antigen detected by monoclonal and antibody IA4)),CD82 antigen	CTGGCCTATCCGCTGCCAGCCTTGAGCCCTGGCTGTTCTGTGGTTCCTCTGCTCACCGCCCATCAGGGTTCTCTTAGCAACTCAGAGAAAAATGCTCCCC	CD82 molecule
CDC42	NM_001039802.1	cell division cycle 42 (GTP-binding protein, 25kD),cell division cycle 42 (GTP binding protein, 25kDa)	ACCGACTGTTTTTGACAACTATGCAGTCACAGTTATGATTGGTGGAGAACCATATACTCTTGGACTTTTTGATACTGCAGGGCAAGAGGATTATGACAGA	cell division cycle 42
CDH1	NM_004360.2	UVO;cadherin 1, type 1, E-cadherin (epithelial)	CGATAATCCTCCGATCTTCAATCCCACCACGTACAAGGGTCAGGTGCCTGAGAACGAGGCTAACGTCGTAATCACCACACTGAAAGTGACTGATGCTGAT	cadherin 1
CDH11	NM_001797.2	cadherin 11, type 2, OB-cadherin (osteoblast)	CAGGAAGCCAAAGTCCCAGTGGCCATTAGGGTCCTTGATGTCAACGATAATGCTCCCAAGTTTGCTGCCCCTTATGAAGGTTTCATCTGTGAGAGTGATC	cadherin 11
CDH13	NM_001220488.1		CTCCTCAAAGCCTGGCTCCCACGGAAAATATGCTCAGTGCAGCCGCGTGCATGAATGAAAACGCCGCCGGGCGCTTCTAGTCGGACAAAATGCAGCCGAG	cadherin 13
CDH2	NM_001792.3	NCAD;cadherin 2, type 1, N-cadherin (neuronal)	GGTCATCCCTCCAATCAACTTGCCAGAAAACTCCAGGGGACCTTTTCCTCAAGAGCTTGTCAGGATCAGGTCTGATAGAGATAAAAACCTTTCACTGCGG	cadherin 2
CDK14	NM_012395.2	PFTK1;PFTAIRE protein kinase 1	ATTACTCAGTGGACGGAGAAGTCTGTTTTGTTACAGAGACATGCCTCTCAGAAGGTCAGGAGGTTTTGAGTACCTATCCTTGCCACCCATACAGGAAATC	cyclin dependent kinase 14
CDKN1A	NM_000389.2	CDKN1;cyclin-dependent kinase inhibitor 1A (p21, Cip1)	CATGTGTCCTGGTTCCCGTTTCTCCACCTAGACTGTAAACCTCTCGAGGGCAGGGACCACACCCTGTACTGTTCTGTGTCTTTCACAGCTCCTCCCACAA	cyclin dependent kinase inhibitor 1A
CDKN2A	NM_000077.3	CDKN2,MLM;cyclin-dependent kinase inhibitor 2A (melanoma, p16, inhibits CDK4)	AAGCGCACATTCATGTGGGCATTTCTTGCGAGCCTCGCAGCCTCCGGAAGCTGTCGACTTCATGACAAGCATTTTGTGAACTAGGGAAGCTCAGGGGGGT	cyclin dependent kinase inhibitor 2A
CDS1	NM_001263.3		AAAAAAAGCACACGAATGCCAAACCTTTCCTTTGGTGGACTGGACACTAACCAGATGAGAGTAAATTTCTTATCCGTGGACGTATGTAAGCTACTGCTGC	CDP-diacylglycerol synthase 1
CEACAM1	NM_001712.3	BGP;carcinoembryonic antigen-related cell adhesion molecule 1 (biliary glycoprotein)	AGAGGGAGGGGTTATAGCTTCAGGAGGGAACCAGCTTCTGATAAACACAATCTGCTAGGAACTTGGGAAAGGAATCAGAGAGCTGCCCTTCAGCGATTAT	carcinoembryonic antigen related cell adhesion molecule 1
CEACAM5	NM_004363.2	CEA;carcinoembryonic antigen-related cell adhesion molecule 5	CCTGCCACTCGGCCTCTAACCCATCCCCGCAGTATTCTTGGCGTATCAATGGGATACCGCAGCAACACACACAAGTTCTCTTTATCGCCAAAATCACGCC	carcinoembryonic antigen related cell adhesion molecule 5
CEACAM6	NM_002483.4	NCA;carcinoembryonic antigen-related cell adhesion molecule 6 (non-specific cross reacting antigen)	CTGGCAGATTGGACCAGACCCTGAATTCTTCTAGCTCCTCCAATCCCATTTTATCCCATGGAACCACTAAAAACAAGGTCTGCTCTGCTCCTGAAGCCCT	carcinoembryonic antigen related cell adhesion molecule 6
CEP170	NM_001042404.1	KIAA0470;KIAA0470,centrosomal protein 170kDa	CTGACTACATCTGGATTTCACCACTCAGAGGAAGGCACATCTTCATCTGGAAGCAAACGTTGGGTTTCACAGTGGGCTAGTTTGGCTGCCAATCATACAA	centrosomal protein 170
CEP295	NM_033395.1	KIAA1731;KIAA1731,centrosomal protein 295kDa	TCCCAGGTGGATGAATCTGAGAGATTCCAGGAATGTATATCAATCAAGAGTGACAGTACCATTCCCTTAAGCCATCCTAAGATCCCAAGATGTCAGGAAA	centrosomal protein 295
CFP	NM_002621.2	PFC;properdin P factor, complement	CTGGGGGGTGGTGTCAGCGTGGAAGACTGCTGTCTCAACACTGCCTTTGCCTACCAGAAACGTAGTGGTGGGCTCTGTCAGCCTTGCAGGTCCCCACGAT	complement factor properdin
CGN	NM_020770.2		GGAGGGAAGCTCAGAAAGTGAAACCTCTGTGAGGAGGAAGGTTAGTTTGGTGCTGGAGAAGATGCAGCCTCTAGTGATGGTTTCTTCTGGTTCTACTAAG	cingulin
CHAD	NM_001267.2		ACACCAACCTGGAGAAGTTCTCAGATGGTGCCTTCCTGGGTGTAACCACGCTGAAACACGTCCATTTGGAGAACAACCGCTTGAACCAGCTACCCTCCAA	chondroadherin
CHD4	NM_001273.2		AGAGGCATCTGTGAAATTCCATGTGCTGCTGACATCCTATGAATTGATCACCATTGACATGGCTATTTTGGGCTCTATTGATTGGGCCTGCCTCATCGTG	chromodomain helicase DNA binding protein 4
CHI3L1	NM_001276.2	chitinase 3-like 1 (cartilage glycoprotein-39)	GGTCTCAAAGATTTTCCAAGATAGCCTCCAACACCCAGAGTCGCCGGACTTTCATCAAGTCAGTACCGCCATTTCTGCGCACCCATGGCTTTGATGGGCT	chitinase 3 like 1
CHP1	XM_005254140.1		CCCTCCTTCCCTCCTGTCGCCGTCTCTTCTGGCGCCGCTGCTCCCGGAGGAGCTCCCGGCACGGCGATGGGTTCTCGGGCCTCCACGTTACTGCGGGACG	calcineurin like EF-hand protein 1
CHP2	NM_022097.3		ATGGACGCATGGACGCAGGGCGACAATAAACTGTATTTTCGTTTCTAACTCTATTTAGGGCCAAGAGAAGAAAGCTGGAAGGATGTGTACTAAAGTCTAG	calcineurin like EF-hand protein 2
CHRDL1	NM_001143981.1	MGC1;megalocornea 1 (X-linked)	GGACAAGTGTGTGTTTCCAATGGAAAGACCTATTCTCATGGCGAGTCCTGGCACCCAAACCTCCGGGCATTTGGCATTGTGGAGTGTGTGCTATGTACTT	chordin like 1
CHRNA7	NR_046324.1	cholinergic receptor, nicotinic, alpha polypeptide 7,cholinergic receptor, nicotinic, alpha 7 (neuronal),cholinergic receptor, nicotinic alpha 7	AGCTTTACAAGGAGCTGGTCAAGAACTACAATCCCTTGGAGAGGCCCGTGGCCAATGACTCGCAACCACTCACCGTCTACTTCTCCCTGAGCCTCCTGCA	cholinergic receptor nicotinic alpha 7 subunit
CIB1	NM_001277764.1		AGACAGCCTTAGCTTTGAGGACTTCCTGGATCTCCTCAGTGTGTTCAGTGACACAGCCACGCCAGACATCAAGTCCCATTATGCCTTCCGCATCTTTGAC	calcium and integrin binding 1
CKMT1A	NM_001015001.1	CKMT1;creatine kinase, mitochondrial 1 (ubiquitous)	GACCTAGCTCCGGCCCTCGGTCTATCCGGTTGCATCCTCCCTCCCTGTTCCGGATCTTATCTTGCGCCAGCGCCTACTCCAGGATCCCGTAGCCAGACCT	creatine kinase, mitochondrial 1A	CKMT1B (NM_020990)
CLDN1	NM_021101.3		GCAAAGTCTTTGACTCCTTGCTGAATCTGAGCAGCACATTGCAAGCAACCCGTGCCTTGATGGTGGTTGGCATCCTCCTGGGAGTGATAGCAATCTTTGT	claudin 1
CLDN3	NM_001306.3	C7orf1,CPETR2	TGCTCACCCTCGTGCCGGTGTCCTGGTCGGCCAACACCATTATCCGGGACTTCTACAACCCCGTGGTGCCCGAGGCGCAGAAGCGCGAGATGGGCGCGGG	claudin 3
CLDN4	NM_001305.3	CPETR,CPETR1	GGGAGCTGGCTTCTGCTGGCCAGGATAGCTTAACCCTGACTTTGGGATCTGCCTGCATCGGCGTTGGCCACTGTCCCCATTTACATTTTCCCCACTCTGT	claudin 4
CLDN7	NM_001307.3	CEPTRL2,CPETRL2	AATTTTGTCTGGAACCACCCTCCCGGCGTATCCTACTCCCTGTGCCGCGAGGCCATCGCTTCACTGGAGGGGTCGATTTGTGTGTAGTTTGGTGACAAGA	claudin 7
CLEC2B	NM_005127.2	CLECSF2;C-type (calcium dependent, carbohydrate-recognition domain) lectin, superfamily member 2 (activation-induced),C-type lectin domain family 2, member B	AGCTACATTTACCAAATCGTTTGGCATGAGAGGGAGTGAAGGATGTGCCTACCTCAGCGATGATGGTGCAGCAACAGCTAGATGTTACACCGAAAGAAAA	C-type lectin domain family 2 member B
CLEC3B	NM_003278.2	TNA;tetranectin (plasminogen binding protein),C-type lectin domain family 3, member B	AGAACTGCGCGGTCCTGTCAGGCGCGGCCAACGGCAAGTGGTTCGACAAGCGCTGCCGCGATCAGCTGCCCTACATCTGCCAGTTCGGGATCGTGTAGCC	C-type lectin domain family 3 member B
CLIC4	NM_013943.2		TCTGACACCATGTAGAAGCTAAAAGTTTAGAGGGAGTGAGGGTTTTCTCAAGACCTTCCTCAAGCATTTTATCTTTAGAAGAGAAACTGATGGGCACCTG	chloride intracellular channel 4
CLU	NM_203339.2	CLI,APOJ;clusterin (complement lysis inhibitor, SP-40,40, sulfated glycoprotein 2, testosterone-repressed prostate message 2, apolipoprotein J)	CGTTCCTTCCGGTGTCACTGAGGTGGTCGTGAAGCTCTTTGACTCTGATCCCATCACTGTGACGGTCCCTGTAGAAGTCTCCAGGAAGAACCCTAAATTT	clusterin
CMA1	NM_001836.2	chymase 1, mast cell	TTCAGAGACTTTGACCACAATCTTCAGCTGTGTGTGGGCAATCCCAGGAAGACAAAATCTGCATTTAAGGGAGACTCTGGGGGCCCTCTTCTGTGTGCTG	chymase 1
CNN1	NM_001299.4	calponin 1, basic, smooth muscle	GTTTGAGAACACCAACCATACACAGGTGCAGTCCACCCTCCTGGCTTTGGCCAGCATGGCGAAGACGAAAGGAAACAAGGTGAACGTGGGAGTGAAGTAC	calponin 1
COL18A1	NM_030582.3	KNO;Knobloch syndrome, type 1,collagen, type XVIII, alpha 1	CCTGGGGCAGAGTGCCGCGAGCTGCCATCACGCCTACATCGTGCTCTGCATTGAGAACAGCTTCATGACTGCCTCCAAGTAGCCACCGCCTGGATGCGGA	collagen type XVIII alpha 1 chain
COL1A1	NM_000088.3	collagen, type I, alpha 1	AACCTCAAGAAGGCCCTGCTCCTCCAGGGCTCCAACGAGATCGAGATCCGCGCCGAGGGCAACAGCCGCTTCACCTACAGCGTCACTGTCGATGGCTGCA	collagen type I alpha 1 chain
COL1A2	NM_000089.3	OI4;osteogenesis imperfecta type IV,collagen, type I, alpha 2,collagen type I alpha 2	CCAATGGATTTGCTGGTCCTGCTGGTGCTGCTGGTCAACCTGGTGCTAAAGGAGAAAGAGGAGCCAAAGGGCCTAAGGGTGAAAACGGTGTTGTTGGTCC	collagen type I alpha 2 chain
COL3A1	NM_000090.3	EDS4A;Ehlers-Danlos syndrome type IV, autosomal dominant,collagen, type III, alpha 1	TTGGCACAACAGGAAGCTGTTGAAGGAGGATGTTCCCATCTTGGTCAGTCCTATGCGGATAGAGATGTCTGGAAGCCAGAACCATGCCAAATATGTGTCT	collagen type III alpha 1 chain
COL4A1	NM_001845.4	collagen, type IV, alpha 1	TGGGCTTAAGTTTTCAAGGACCAAAAGGTGACAAGGGTGACCAAGGGGTCAGTGGGCCTCCAGGAGTACCAGGACAAGCTCAAGTTCAAGAAAAAGGAGA	collagen type IV alpha 1 chain
COL4A2	NM_001846.2	collagen type IV alpha 2	GGCATTTCCTTGAAGGGAGAAGAAGGAATCATGGGCTTTCCTGGACTGAGGGGTTACCCTGGCTTGAGTGGTGAAAAAGGATCACCAGGACAGAAGGGAA	collagen type IV alpha 2 chain
COL4A6	NM_001847.2	collagen, type IV, alpha 6	TGGGATTTCCTGGGCTTAATGGATTCCAAGGAATTGAGGGTCAAAAGGGTGACATTGGCCTGCCAGGCCCAGATGTTTTCATCGATATAGATGGTGCTGT	collagen type IV alpha 6 chain
COL5A1	NM_000093.3	collagen type V alpha 1	GTAAAGGTCATCCCACCATCACCAAAGCCTCCGTTTTTAACAACCTCCAACACGATCCATTTAGAGGCCAAATGTCATTCTGCAGGTGCCTTCCCGATGG	collagen type V alpha 1 chain
COL5A2	NM_000393.3	collagen, type V, alpha 2	GGTTCATGCTACCCTGAAGTCACTCAGTAGTCAGATTGAAACCATGCGCAGCCCCGATGGCTCGAAAAAGCACCCAGCCCGCACGTGTGATGACCTAAAG	collagen type V alpha 2 chain
COL6A1	NM_001848.2	collagen, type VI, alpha 1	CCTCTGTCCCCATAGCTGGTTTTTCCCACCAATCCTCACCTAACAGTTACTTTACAATTAAACTCAAAGCAAGCTCTTCTCCTCAGCTTGGGGCAGCCAT	collagen type VI alpha 1 chain
COL6A2	NM_001849.2	collagen type VI alpha 2	TCGTCATCGACAGCTCCGAGAGCATTGGGTACACCAACTTCACACTGGAGAAGAACTTCGTCATCAACGTGGTCAACAGGCTGGGTGCCATCGCTAAGGA	collagen type VI alpha 2 chain
COL6A3	NM_004369.3	collagen, type VI, alpha 3	AGAGCAAGCGAGACATTCTGTTCCTCTTTGACGGCTCAGCCAATCTTGTGGGCCAGTTCCCTGTTGTCCGTGACTTTCTCTACAAGATTATCGATGAGCT	collagen type VI alpha 3 chain
COL7A1	NM_000094.2	EBDCT,EBD1,EBR1;epidermolysis bullosa, dystrophic, dominant and recessive,collagen, type VII, alpha 1	GCTCTGGGGGTGATGTGATCCGCGCCATCCGTGAGCTTAGCTACAAGGGGGGCAACACTCGCACAGGGGCTGCAATTCTCCATGTGGCTGACCATGTCTT	collagen type VII alpha 1 chain
COMP	NM_000095.2	PSACH,EDM1,EPD1;cartilage oligomeric matrix protein (pseudoachondroplasia, epiphyseal dysplasia 1, multiple)	ACGTGGTCTTGGACACAACCATGCGGGGTGGCCGCCTGGGGGTCTTCTGCTTCTCCCAGGAGAACATCATCTGGGCCAACCTGCGTTACCGCTGCAATGA	cartilage oligomeric matrix protein
CREBBP	NM_001079846.1	RSTS;Rubinstein-Taybi syndrome	GGCAGTCAGGGCGACAGCAAGAATGCCAAGAAGAAGAACAACAAGAAAACCAACAAGAACAAAAGCAGCATCAGCCGCGCCAACAAGAAGAAGCCCAGCA	CREB binding protein
CRIP2	NM_001270837.1		CAGCCCTACTGCCACAAGCCCTGCTATGGAATCCTCTTCGGACCCAAGGGAGTGAACACCGGTGCGGTGGGCAGCTACATCTATGACCGGGACCCCGAAG	cysteine rich protein 2
CRISPLD2	NM_031476.3	LCRISP2;LCCL domain containing cysteine-rich secretory protein 2	CTGGTTCACACCCAGGACTTTTCTTTGCAAGCGAACCTGTTTGAAGCCCAAGTCTTAACTCCTGGTCTCGTAAGGTTCCACTGAGACGAGATGTCTGAGA	cysteine rich secretory protein LCCL domain containing 2
CSF2RB	NM_000395.2	IL3RB;colony stimulating factor 2 receptor, beta, low-affinity (granulocyte-macrophage)	GCCCAGGAGATGTGTCATTCCCTGCCAGAGTTTTGTCGTCACTGACGTTGACTACTTCTCATTCCAACCAGACAGGCCTCTGGGCACCCGGCTCACCGTC	colony stimulating factor 2 receptor beta common subunit
CSPG4	NM_001897.4	chondroitin sulfate proteoglycan 4 (melanoma-associated)	ATATATTCAGGGTGCAGGGTGGGTAGGTTGCTCTGGGGATGGGTTTATTTAAGGGAGATTGCAAGGAAGCTATTTAACATGGTGCTGAGCTAGCCAGGAC	chondroitin sulfate proteoglycan 4
CST7	NM_003650.3	cystatin F (leukocystatin)	AAAGGCCTGAAATATATGCTGGAGGTGGAAATTGGCAGAACTACCTGCAAGAAAAACCAGCACCTGCGTCTGGATGACTGTGACTTCCAAACCAACCACA	cystatin F
CTNNB1	NM_001098210.1	CTNNB;catenin (cadherin-associated protein), beta 1 (88kD),catenin (cadherin-associated protein), beta 1, 88kDa,catenin (cadherin-associated protein), beta 1	TCTTGCCCTTTGTCCCGCAAATCATGCACCTTTGCGTGAGCAGGGTGCCATTCCACGACTAGTTCAGTTGCTTGTTCGTGCACATCAGGATACCCAGCGC	catenin beta 1
CTNND1	NM_001331.2	CTNND;catenin (cadherin-associated protein), delta 1	AAGAAGAGCAGGAAAGATCCCGAAAGGAGGAAGAGGTGGCGAAAAATCAACTGCCCTGCTGGATTTGTCTTTCTCAGCACCTTGGCGAAGCCTTGGGTTT	catenin delta 1
CTSG	NM_001911.2		AGTCCAGCAGGTCAGAGCAGATGTGGAGGGTTCCTGGTGCGAGAAGACTTTGTGCTGACAGCAGCTCATTGCTGGGGAAGCAATATAAATGTCACCCTGG	cathepsin G
CTSH	NM_148979.2	CPSB	ACCCTGTGAGCTTTGCCTTTGAGGTGACTCAGGACTTCATGATGTATAGAACGGGCATCTACTCCAGTACTTCCTGCCATAAAACTCCAGATAAAGTAAA	cathepsin H
CTSK	NM_000396.2	CTSO2,CTSO,PYCD;cathepsin K (pycnodysostosis)	TCTCATTCCCGCAGTAATGACACCCTTTATATCCCAGAATGGGAAGGTAGAGCCCCAGACTCTGTCGACTATCGAAAGAAAGGATATGTTACTCCTGTCA	cathepsin K
CTSL	NM_001912.4	CTSL1;cathepsin L1	TGTGGGGCCCATTTCTGTTGCTATTGATGCAGGTCATGAGTCCTTCCTGTTCTATAAAGAAGGCATTTATTTTGAGCCAGACTGTAGCAGTGAAGACATG	cathepsin L
CUL1	NM_003592.2		CTGGTAATGTCTGCATTCAACAATGACGCTGGCTTTGTGGCTGCTCTTGATAAGGCTTGTGGTCGCTTCATAAACAACAACGCGGTTACCAAGATGGCCC	cullin 1
CX3CL1	NM_002996.3	SCYD1;small inducible cytokine subfamily D (Cys-X3-Cys), member 1 (fractalkine, neurotactin),chemokine (C-X3-C motif) ligand 1	AGCACCACGGTGTGACGAAATGCAACATCACGTGCAGCAAGATGACATCAAAGATACCTGTAGCTTTGCTCATCCACTATCAACAGAACCAGGCATCATG	C-X3-C motif chemokine ligand 1
CXADR	NM_001338.3	coxsackie virus and adenovirus receptor	CCACATATTGAGATGACACTAGGTGCAATAGCAGGGATAGATTTTGTTGGTGAGTAGTCTCATGCCTTGAGATCTGTGGTGGTCTTCAAAATGGTGGCCA	CXADR, Ig-like cell adhesion molecule	sub-maximal variant coverage due to cross-hyb in common region
CXCL10	NM_001565.1	INP10,SCYB10;small inducible cytokine subfamily B (Cys-X-Cys), member 10,chemokine (C-X-C motif) ligand 10	GCAGAGGAACCTCCAGTCTCAGCACCATGAATCAAACTGCGATTCTGATTTGCTGCCTTATCTTTCTGACTCTAAGTGGCATTCAAGGAGTACCTCTCTC	C-X-C motif chemokine ligand 10
CXCL11	NM_005409.3	SCYB9B,SCYB11;small inducible cytokine subfamily B (Cys-X-Cys), member 11,chemokine (C-X-C motif) ligand 11	CAGAATTCCACTGCCCAAAGGAGTCCAGCAATTAAATGGATTTCTAGGAAAAGCTACCTTAAGAAAGGCTGGTTACCATCGGAGTTTACAAAGTGCTTTC	C-X-C motif chemokine ligand 11
CXCL12	NM_199168.3	SDF1A,SDF1B,SDF1;stromal cell-derived factor 1,chemokine (C-X-C motif) ligand 12	CCGCCCGCCCGCCCGCCCGCGCCATGAACGCCAAGGTCGTGGTCGTGCTGGTCCTCGTGCTGACCGCGCTCTGCCTCAGCGACGGGAAGCCCGTCAGCCT	C-X-C motif chemokine ligand 12
CXCL13	NM_006419.2	SCYB13;small inducible cytokine B subfamily (Cys-X-Cys motif), member 13 (B-cell chemoattractant),chemokine (C-X-C motif) ligand 13	AGACGCTTCATTGATCGAATTCAAATCTTGCCCCGTGGGAATGGTTGTCCAAGAAAAGAAATCATAGTCTGGAAGAAGAACAAGTCAATTGTGTGTGTGG	C-X-C motif chemokine ligand 13
CXCL17	NM_198477.1	chemokine (C-X-C motif) ligand 17	AACAAGCATTCCAGAGCCTGCCAGCAATTTCTCAAACAATGTCAGCTAAGAAGCTTTGCTCTGCCTTTGTAGGAGCTCTGAGCGCCCACTCTTCCAATTA	C-X-C motif chemokine ligand 17
CXCL8	NM_000584.2	IL8;interleukin 8,chemokine (C-X-C motif) ligand 8	ACAGCAGAGCACACAAGCTTCTAGGACAAGAGCCAGGAAGAAACCACCGGAAGGAACCATCTCACTGTGTGTAAACATGACTTCCAAGCTGGCCGTGGCT	C-X-C motif chemokine ligand 8
CXCR2	NM_001168298.1	IL8RB;interleukin 8 receptor, beta,chemokine (C-X-C motif) receptor 2	TTACGGATCCTGCCCCAGTCCTTTGGCTTCATCGTGCCACTGCTGATCATGCTGTTCTGCTACGGATTCACCCTGCGTACGCTGTTTAAGGCCCACATGG	C-X-C motif chemokine receptor 2
CXCR3	NM_001504.1	GPR9;G protein-coupled receptor 9,chemokine (C-X-C motif) receptor 3	GTGAGTGACCACCAAGTGCTAAATGACGCCGAGGTTGCCGCCCTCCTGGAGAACTTCAGCTCTTCCTATGACTATGGAGAAAACGAGAGTGACTCGTGCT	C-X-C motif chemokine receptor 3
CXCR4	NM_003467.2	chemokine (C-X-C motif), receptor 4 (fusin),chemokine (C-X-C motif) receptor 4	ATTGATGTGTGTCTAGGCAGGACCTGTGGCCAAGTTCTTAGTTGCTGTATGTCTCGTGGTAGGACTGTAGAAAAGGGAACTGAACATTCCAGAGCGTGTA	C-X-C motif chemokine receptor 4
CYB561	NM_001915.3		TCCGCTGCTATAGACCAGTTCATTGTGTGTGGCTCCCGTGTCTCTGTTGCCCCCTTCAGTGCAGAAGGCTTTGGGTAGGACTTCGGGTGTTCGGTCCTGG	cytochrome b561
CYBB	NM_000397.3	CGD;chronic granulomatous disease,cytochrome b-245, beta polypeptide	TTTGAAGCATGAAAAAAGAGGGTTGGAGGTGGAGAATTAACCTCCTGCCATGACTCTGGCTCATCTAGTCCTGCTCCTTGTGCTATAAAATAAATGCAGA	cytochrome b-245 beta chain
CYP1B1	NM_000104.3	GLC3A;cytochrome P450, subfamily I (dioxin-inducible), polypeptide 1 (glaucoma 3, primary infantile),cytochrome P450, family 1, subfamily B, polypeptide 1	AGAACTTTGATCCAGCTCGATTCTTGGACAAGGATGGCCTCATCAACAAGGACCTGACCAGCAGAGTGATGATTTTTTCAGTGGGCAAAAGGCGGTGCAT	cytochrome P450 family 1 subfamily B member 1
DAG1	NM_001165928.2	dystroglycan 1 (dystrophin-associated glycoprotein 1)	ACAGTGGTTGGCATTCCTGATGGCACGGCTGTCGTCGGGCGCTCATTTCGAGTGACCATTCCAACAGATTTGATTGCCTCCAGTGGAGATATCATCAAGG	dystroglycan 1
DCC	NM_005215.1	deleted in colorectal carcinoma	CTGATCCCATCCTCTTCAGGACTCTGAAAGTGGAACACCCTGACAAAATGGCTAATGACCAAGGTCGTCATGGAGATGGAGGTTATTGGCCAGTTGATAC	DCC netrin 1 receptor
DCN	NM_001920.3		ATCATCCTCCTTCTGCTTGCACAAGTTTCCTGGGCTGGACCGTTTCAACAGAGAGGCTTATTTGACTTTATGCTAGAAGATGAGGCTTCTGGGATAGGCC	decorin
DDR2	NM_006182.2	TYRO10,NTRKR3;discoidin domain receptor family, member 2	TGACAGTCAGCCTTTCCCTGCCAAGTGATTCTAGCATGTTCAACAATAACCGCTCCTCATCACCTAGTGAACAAGGGTCCAACTCGACTTACGATCGCAT	discoidin domain receptor tyrosine kinase 2
DENND5A	NM_015213.2	RAB6IP1;RAB6 interacting protein 1,DENN/MADD domain containing 5A	TTAGTAGTGCCTCTAAGCAAGCACCGATGAGTCAGTCCCACGTATTTTCTTTTTTGTCAGTATTGTTTGGGAAGGAGACATGCCGGGATGTGTCATCGTG	DENN domain containing 5A
DENR	NM_003677.3	density-regulated protein	GAGTGGAAGGCCGTTCAGAGAGGCTAGAGGTTCTTATTCTGGCTATAAATTATGTGAGTAAAATTGTGCTAACCAGTTAAAAGTACTGTACACCCATGCT	density regulated re-initiation and release factor
DESI1	NM_015704.2	FAM152B,PPPDE2;family with sequence similarity 152, member B,PPPDE peptidase domain containing 2	CAAGACCCACTGATTTGCCAGTGTGCATGGAAATAATAGATTAGAGCAGAAACTAGCAGGGACTGTTGTATAATCGTGATCTACTAGCAGAATTGGGCCC	desumoylating isopeptidase 1
DICER1	NM_177438.2	MNG1;Dicer1, Dcr-1 homolog (Drosophila),multinodular goitre 1,dicer 1, ribonuclease type III	AGAATTTCAACAGCCAACAAAAGAACCTTTCAGTGAGCTGTGCTGCTGCTTCTGTGGCCAGTTCACGCTCTTCTGTATTGAAAGACTCGGAATATGGTTG	dicer 1, ribonuclease III
DLC1	NM_006094.3	deleted in liver cancer 1	CACTCCCAAACAGGAAACCCTGGTGAAGGTTCAGGAAGCACGGAGATTCTCTCCAACAAAGGTCCAGTTAGGAAACGACGCTGAGAGGATGACGACAACG	DLC1 Rho GTPase activating protein	sub-maximal variant coverage due to non-overlapping variants
DLG1	NM_001098424.1	discs, large homolog 1 (Drosophila),discs large homolog 1, scribble cell polarity complex component	CTCAGCCTGTTGATAACCATGTTAGCCCATCTTCCTTCTTGGGCCAGACACCAGCATCTCCAGCCAGATACTCCCCAGTTTCTAAAGCAGTACTTGGAGA	discs large MAGUK scaffold protein 1
DLL4	NM_019074.2	delta-like 4 homolog (Drosophila),delta-like 4 (Drosophila)	AATGACCACTTCGGCCACTATGTGTGCCAGCCAGATGGCAACTTGTCCTGCCTGCCCGGTTGGACTGGGGAATATTGCCAACAGCCTATCTGTCTTTCGG	delta like canonical Notch ligand 4
DPT	NM_001937.3		TACTGGCAAACTCTCCTGGATTGGGCCTGATTTTTTTGGTGGGAAAGGCTGCCCTGGGGATCAACTTTCCTTCTGTGTGTGGCTCAGGAGTTCTTCTGCA	dermatopontin
DPYSL3	NM_001387.2	dihydropyrimidinase-like 3	CCCTGGGCAGCCAGCATTCATTGTAAGTTCCCTCTTTGAAAACTGGTGTGTGGGTGTTCAGTTCTGTGTCTGGTGGGTATGGACAGACAGTAATCTCCTG	dihydropyrimidinase like 3
DSC2	NM_024422.3	DSC3	ATCATCTGCAAACCCACCATGTCATCTGCGGAGATTGTTGCGGTTGATCCTGATGAGCCTATCCATGGCCCACCCTTTGACTTTAGTCTGGAGAGTTCTA	desmocollin 2
DST	NM_001723.4	BPAG1;bullous pemphigoid antigen 1, 230/240kDa	CGAATAACTCTCATCGTGCTAAATGGAAGGTCATTAGTCCTACTGGGAATGAGGCTATGGTCCCATCTGTGTGCTTCACCGTTCCTCCACCAAACAAAGA	dystonin
ECM1	NM_004425.3		TGTTGCCGCCACCCTCCCAGCCCTACTCGGGATGAGTGCTTTGCCCGTCGGGCTCCTTACCCCAACTATGACCGGGACATCTTGACCATTGACATCGGTC	extracellular matrix protein 1
ECM2	NM_001393.2	extracellular matrix protein 2, female organ and adipocyte specific	AAGCTCTATCACGTCCCGTCCTATCTACCCAAGTCCTTGCTGCACCTAGTACTCCTTGGGAACCAGATTGAACGGATCCCTGGCTATGTGTTTGGCCACA	extracellular matrix protein 2
ECSCR	NM_001077693.3	endothelial cell-specific chemotaxis regulator	TAGCTCTCAGGGAGGCCTTGGCGGTCTAAGTCTGACCACAGAGCCAGTTTCTTCCAACCCAGGATACATCCCTTCCTCAGAGGCTAACAGGCCAAGCCAT	endothelial cell surface expressed chemotaxis and apoptosis regulator
EDN1	NM_001955.2		TTTCATGATCCCAAGCTGAAAGGCAATCCCTCCAGAGAGCGTTATGTGACCCACAACCGAGCACATTGGTGACAGACCTTCGGGGCCTGTCTGAAGCCAT	endothelin 1
EGF	NM_001963.4	epidermal growth factor (beta-urogastrone)	GGAGTGAAGGCTCTGTTGGAGACATCAGAGAAAATAACAGCTGTGTCATTGGATGTGCTTGATAAGCGGCTGTTTTGGATTCAGTACAACAGAGAAGGAA	epidermal growth factor
EGFL7	NM_016215.3	EGF-like-domain, multiple 7	GCAGGGCCTTCCTCCTCTTCCTCCTCCCCTTCCTCGGGAGGCTCCCCAGACCCTGGCATGGGATGGGCTGGGATCTTCTCTGTGAATCCACCCCTGGCTA	EGF like domain multiple 7
EGFR	NM_201282.1	ERBB;epidermal growth factor receptor (avian erythroblastic leukemia viral (v-erb-b) oncogene homolog)	ACGCAGTTGGGCACTTTTGAAGATCATTTTCTCAGCCTCCAGAGGATGTTCAATAACTGTGAGGTGGTCCTTGGGAATTTGGAAATTACCTATGTGCAGA	epidermal growth factor receptor
EGLN2	NM_053046.3	egl nine homolog 2 (C. elegans)	CACCAGGTACGCCATCACTGTCTGGTATTTTGATGCCAAGGAGCGGGCAGCAGCCAAAGACAAGTATCAGCTAGCATCAGGACAGAAAGGTGTCCAAGTA	egl-9 family hypoxia inducible factor 2
EGLN3	NM_022073.3	egl nine homolog 3 (C. elegans)	AAGCTACATGGTGGGATCCTGCGGATATTTCCAGAGGGGAAATCATTCATAGCAGATGTGGAGCCCATTTTTGACAGACTCCTGTTCTTCTGGTCAGATC	egl-9 family hypoxia inducible factor 3
EIF2AK3	NM_004836.5		AGGTATATCTGTTCAGCTCTGGGTTGTCGCCAATGGGATAGTGACGAAATGGAACAAGAGGAAGACATCCTGCTTCTACAGCGTACCCAAAAAACTGTTA	eukaryotic translation initiation factor 2 alpha kinase 3
EIF4E2	NM_004846.3	EIF4EL3;eukaryotic translation initiation factor 4E-like 3	ACATTATTTCAATATGGAATAAGACTGCCAGTGACCAAGCAACCACAGCCCGAATCCGGGACACACTTCGGCGAGTGCTTAACCTACCTCCCAACACCAT	eukaryotic translation initiation factor 4E family member 2
EIF4EBP1	NM_004095.3		CTGCGCAATAGCCCAGAAGATAAGCGGGCGGGCGGTGAAGAGTCACAGTTTGAGATGGACATTTAAAGCACCAGCCATCGTGTGGAGCACTACCAAGGGG	eukaryotic translation initiation factor 4E binding protein 1
ELF3	NM_001114309.1	ESX;E74-like factor 3 (ets domain transcription factor, epithelial-specific )	AGTTCTGGTCGAAGACGCAGGTTCTGGACTGGATCAGCTACCAAGTGGAGAAGAACAAGTACGACGCAAGCGCCATTGACTTCTCACGATGTGACATGGA	E74 like ETS transcription factor 3
ELK3	NM_005230.2	ELK3, ETS-domain protein (SRF accessory protein 2)	GGCGTCCGCCTTCCTGGCCTCGTCCGTCTCGGCCAAGATCTCCTCTTTAATGTTGCCAAACGCTGCCAGTATTTCATCCGCCTCACCCTTCTCATCTCGG	ELK3, ETS transcription factor
EMCN	NM_016242.3		GACACCATCTACGGGCACCATGGAACTGCTTCAAGTGACCATTCTTTTTCTTCTGCCCAGTATTTGCAGCAGTAACAGCACAGGTGTTTTAGAGGCAGCT	endomucin
EMILIN1	XM_006711928.1		CTCCGCCCTCGCTACCGTGTGGCCTACAAGACAGTGACCGACATGGAGTGGAGGTGCTGTCAGGGTTATGGGGGCGATGACTGTGCTGAGAGTCCCGCTC	elastin microfibril interfacer 1
EMILIN3	NM_052846.1	C20orf130,EMILIN5;elastin microfibril interfacer 5	CAGCTTCATGGATGTTGTATCTGAACTAAGGACCAGAGGCTGCCAGATGTTTCTGGCTCCTCACGTGTCCTTCAGGACAGAACAGAAGCACAAAGACTCA	elastin microfibril interfacer 3
EMP3	NM_001425.2		GGGAAAGAGTCCCTGAATCTCTGGTACGACTGCACGTGGAACAACGACACCAAAACATGGGCCTGCAGTAATGTCAGCGAGAATGGCTGGCTGAAGGCGG	epithelial membrane protein 3
ENO1	NM_001428.2	ENO1L1,MPB1;enolase 1, (alpha)	TTCTCGCCTCACTTTCCACCAAGTGTCTAGAGTCATGTGAGCCTCGTGTCATCTCCGGGGTGGCCACAGGCTAGATCCCCGGTGGTTTTGTGCTCAAAAT	enolase 1
ENO2	NM_001975.2	enolase 2 (gamma, neuronal)	GTTGGTGTGCTGAGGTGTTAGAGAGGGACCATGTGTCACTTGTGCTTTGCTCTTGTCCCACGTGTCTTCCACTTTGCATATGAGCCGTGAACTGTGCATA	enolase 2
ENO3	NM_001976.4	enolase 3, (beta, muscle),enolase 3 (beta, muscle)	ATGAGGATCGAGGAGGCTCTTGGGGACAAGGCAATCTTTGCTGGACGCAAGTTCCGTAACCCGAAGGCCAAGTGAGAAGCTGGAGGCTCCAGGACTCCAC	enolase 3
ENPEP	NM_001977.3	glutamyl aminopeptidase (aminopeptidase A)	GCCTGGAATTGGATACAACTCAACTGGGACTATCTAGTCAACAGATATACACTCAATAACAGAAACCTTGGCCGAATTGTCACAATAGCAGAGCCATTCA	glutamyl aminopeptidase
ENPP2	NM_001040092.2	PDNP2	CATCATATACTGTTTCCAAACAGGCTGAGGTTTCCAGCGTTCCTGACCATCTGACCAGTTGCGTCCGGCCTGATGTCCGTGTTTCTCCGAGTTTCAGTCA	ectonucleotide pyrophosphatase/phosphodiesterase 2
EP300	NM_001429.2		CCAGCCAGGCCCAACAGAGCAGTCCTGGATTAGGTTTGATAAATAGCATGGTCAAAAGCCCAATGACACAGGCAGGCTTGACTTCTCCCAACATGGGGAT	E1A binding protein p300
EPAS1	NM_001430.3		TGCACTGAGCTATGTGACTCGGATGGTCTTTCACACGGCACATTTGGACATTTCCAGAACTACCATGAGATGGTTTAGACGGGAATTCATGCAAATGAGG	endothelial PAS domain protein 1
EPCAM	NM_002354.1	M4S1,MIC18,TACSTD1;antigen identified by monoclonal antibody AUA1,tumor-associated calcium signal transducer 1	AGAAGAGCAAAACCTGAAGGGGCCCTCCAGAACAATGATGGGCTTTATGATCCTGACTGCGATGAGAGCGGGCTCTTTAAGGCCAAGCAGTGCAACGGCA	epithelial cell adhesion molecule
EPHA1	NM_005232.3	EPHT,EPHT1;EphA1	AGGTGGCCAGTGGTGGAACTTCCTTCGAGAGGCAACTATCATGGGCCAGTTTAGCCACCCGCATATTCTGCATCTGGAAGGCGTCGTCACAAAGCGAAAG	EPH receptor A1
EPHA2	NM_004431.2	ECK;EphA2	GAGCCGAGTGTGGAAGTACGAGGTCACTTACCGCAAGAAGGGAGACTCCAACAGCTACAATGTGCGCCGCACCGAGGGTTTCTCCGTGACCCTGGACGAC	EPH receptor A2
EPHB1	NM_004441.3	EPHT2;EphB1	GCAGCGGCCGGGGTCGTGTTCGTTGTGTCCTTGGTGGCCATCTCTATCGTCTGTAGCAGGAAACGGGCTTATAGCAAAGAGGCTGTGTACAGCGATAAGC	EPH receptor B1
EPHB3	NM_004443.3	ETK2;EphB3	GCTGGACTTTCGGACTCTTGGACTTTTGGATGCCTGGCCTTAGGCTGTGGCCCAGAAGCTGGAAGTTTGGGAAAGGCCCAAGCTGGGACTTCTCCAGGCC	EPH receptor B3
EPHB4	NM_004444.4	HTK;EphB4	GTCCTGACTTCACCTATACCTTTGAGGTCACTGCATTGAACGGGGTATCCTCCTTAGCCACGGGGCCCGTCCCATTTGAGCCTGTCAATGTCACCACTGA	EPH receptor B4
EPN3	NM_017957.2		ACCCTCGTTCTCAGCTCTCACCAAGTGGACTTTTTGCGGGGTGTGGCGGCCGGGTCTCGACCACAGCGTGGATCACCGGCTGTTTAGGAAACTGCAGCTG	epsin 3
EPS8L1	NM_017729.3		AGAGTGACGAGGCCCCGTGGGAGAACGGACTCCTCAGACTCTCCCCAATAGCGGAAGTCGATCTTCTGAAGGATGGCCAATCTGCTCCGGCCCTGGTCTT	EPS8 like 1
ERBB2	NM_001005862.1	NGL;v-erb-b2 avian erythroblastic leukemia viral oncogene homolog 2 (neuro/glioblastoma derived oncogene homolog),v-erb-b2 avian erythroblastic leukemia viral oncogene homolog 2	ACAGACACGTTTGAGTCCATGCCCAATCCCGAGGGCCGGTATACATTCGGCGCCAGCTGTGTGACTGCCTGTCCCTACAACTACCTTTCTACGGACGTGG	erb-b2 receptor tyrosine kinase 2
ERBB2IP	NM_018695.2	ERBB2IP;erbb2-interacting protein	CACAGAGACCCCTTTCTGCACGAACATACAGCATAGATGGTCCAAATGCATCAAGACCTCAGAGTGCTCGACCCTCTATTAATGAAATACCAGAGAGAAC	erbb2 interacting protein		ERBIN
ERBB3	NM_001005915.1	LCCS2;lethal congenital contracture syndrome 2,v-erb-b2 avian erythroblastic leukemia viral oncogene homolog 3	CCTGCAGTGGATTCGAGAAGTGACAGGCTATGTCCTCGTGGCCATGAATGAATTCTCTACTCTACCATTGCCCAACCTCCGCGTGGTGCGAGGGACCCAG	erb-b2 receptor tyrosine kinase 3
EREG	NM_001432.2		GAGAGTCCAGTGATAACTGCACAGCTTTAGTTCAGACAGAAGACAATCCACGTGTGGCTCAAGTGTCAATAACAAAGTGTAGCTCTGACATGAATGGCTA	epiregulin
ERMP1	NM_024896.2	KIAA1815;KIAA1815	TGGGCTAGCTTGATTCGTGCATTCATTAACCTAGAGGCAGCAGGTGTAGGAGGGAAAGAACTTGTATTCCAAACAGGTCCTGAAAATCCTTGGTTGGTTC	endoplasmic reticulum metallopeptidase 1
ESRP1	NM_001034915.2	RBM35A;RNA binding motif protein 35A	GACTGTATACGCCTTCGAGGTCTTCCCTATGCAGCCACAATTGAGGACATCCTGGATTTCCTGGGGGAGTTCGCCACAGATATTCGTACTCATGGGGTTC	epithelial splicing regulatory protein 1
ETV4	NM_001079675.1	ets variant gene 4 (E1A enhancer-binding protein, E1AF)	GGCCCTCTTCTCTTTGGCCTTCCCGGACAATCAGCGTCCAGCTCTCAAGGCTGAGTTTGACCGGCCTGTCAGTGAGGAGGACACAGTCCCTTTGTCCCAC	ETS variant 4
EVI2A	NM_014210.3	EVI2	CAGCAACAGTCCTTCAACAGTACAGAGCATTGAAAACACAAGCAAAAGTCATGGTGAAATTTTCAAAAAGGATGTCTGTGCGGAAAACAACAACAACATG	ecotropic viral integration site 2A
EVPL	NM_001988.2		CAAGGACGGCCACCTGCCCATCTCCGAGTTTGCGCTGCTTGTAGCTGGGGAGACCAAGCCAAGCTCCTCACTCTCCATCGGCTCTATCATCTCCAAGTCC	envoplakin
F11R	NM_144503.1	JAM1;junctional adhesion molecule 1	GGAAGCAGAGGTGATTCATGGCTCTGTGAATTTGAGGTGAATGGTTCCTTATTGTCTAGGCCACTTGTGAAGAATATGAGTCAGTTATTGCCAGCCTTGG	F11 receptor
F3	NM_001993.3	coagulation factor III (thromboplastin, tissue factor)	GAGCTGGAAGGAGAACTCCCCACTGAATGTTTCATAAAGGAAGCACTGTTGGAGCTACTGCAAATGCTATATTGCACTGTGACCGAGAACTTTTAAGAGG	coagulation factor III, tissue factor
FAM174B	NM_207446.2	family with sequence similarity 174, member B	CCCATCTGATCCTTTGCTGCTTTTTTGGCTTGGTCAGGTCCTGGCCTCATTTTGGCGTTACCTGTGTCAGAGTTCAAGGTGGATGTGCTTAGAGCTGGTC	family with sequence similarity 174 member B
FAP	NM_004460.2	fibroblast activation protein, alpha	GCATTGGAAGCTATCCTCCAAGCAAGAAGTGTGTTACTTGCCATCTAAGGAAAGAAAGGTGCCAATATTACACAGCAAGTTTCAGCGACTACGCCAAGTA	fibroblast activation protein alpha
FASLG	NM_000639.1	APT1LG1,TNFSF6;tumor necrosis factor (ligand) superfamily, member 6,Fas ligand (TNF superfamily, member 6)	TCCATGCCTCTGGAATGGGAAGACACCTATGGAATTGTCCTGCTTTCTGGAGTGAAGTATAAGAAGGGTGGCCTTGTGATCAATGAAACTGGGCTGTACT	Fas ligand
FBLN1	NM_006487.2		CCTCCCCGATTTTATCTGTCAGAATACTCTGGGATCCTTCCGCTGCCGACCCAAGCTACAGTGCAAGAGTGGCTTTATACAAGATGCTCTAGGCAACTGT	fibulin 1
FBLN5	NM_006329.3		TGGCGGGGAACCCTGGGAGTAGCTAGTTTGCTTTTTGCGTACACAGAGAAGGCTATGTAAACAAACCACAGCAGGATCGAAGGGTTTTTAGAGAATGTGT	fibulin 5
FBN1	NM_000138.3	FBN,MFS1,WMS;fibrillin 1 (Marfan syndrome)	CACTGAAGGCAGCTTCAAATGTCTGTGTCCAGAAGGGTTTTCCTTGTCCTCCAGTGGAAGAAGGTGCCAAGATTTGCGAATGAGCTACTGTTATGCGAAG	fibrillin 1
FBN2	NM_001999.3	CCA;congenital contractural arachnodactyly	AGCCAAAGCAGCTCATTTGTGACAACATTTCATATCACCAGACACACCAGGCAACAGAAGTTGAAGCACAACCACTGTAGCAAAATACCTTGACTGCTTG	fibrillin 2
FBP1	NM_000507.3	FBP;fructose-1,6-bisphosphatase 1	AGTCATCCTTTGCCACGTGTGTTCTCGTGTCAGAAGAAGATAAACACGCCATCATAGTGGAACCGGAGAAAAGGGGTAAATATGTGGTCTGTTTTGATCC	fructose-bisphosphatase 1
FERMT2	NM_001135000.1	PLEKHC1;pleckstrin homology domain containing, family C (with FERM domain) member 1,fermitin family homolog 2 (Drosophila)	AGCAAAAATCAACCAAGGATGGCTTGATTCCTCAAGATCTCTCATGGAACAAGATGTGAAGGAAAATGAGGCCTTGCTGCTCCGATTCAAGTATTACAGC	fermitin family member 2
FGF18	NM_003862.1		AATTCTACCTGTGCATGAACCGCAAAGGCAAGCTCGTGGGGAAGCCCGATGGCACCAGCAAGGAGTGTGTGTTCATCGAGAAGGTTCTGGAGAACAACTA	fibroblast growth factor 18
FGF2	NM_002006.4	FGFB;fibroblast growth factor 2 (basic)	GTCCGGGAGAAGAGCGACCCTCACATCAAGCTACAACTTCAAGCAGAAGAGAGAGGAGTTGTGTCTATCAAAGGAGTGTGTGCTAACCGTTACCTGGCTA	fibroblast growth factor 2
FGF9	NM_002010.2	fibroblast growth factor 9 (glia-activating factor)	TGTTGCCAAACTTTGTCGCATGCATAATGTATGATGGAGGCTTGGATGGGAATATGCTGATTTTGTTCTGCACTTAAAGGCTTCTCCTCCTGGAGGGCTG	fibroblast growth factor 9
FGFR1	NM_015850.2	FLT2,KAL2;fms-related tyrosine kinase 2	TACAAGGTCCGTTATGCCACCTGGAGCATCATAATGGACTCTGTGGTGCCCTCTGACAAGGGCAACTACACCTGCATTGTGGAGAATGAGTACGGCAGCA	fibroblast growth factor receptor 1
FGFR2	NM_000141.4	KGFR,BEK,CFD1,JWS;bacteria-expressed kinase,keratinocyte growth factor receptor,craniofacial dysostosis 1,Jackson-Weiss syndrome	ATGGTCAGCTGGGGTCGTTTCATCTGCCTGGTCGTGGTCACCATGGCAACCTTGTCCCTGGCCCGGCCCTCCTTCAGTTTAGTTGAGGATACCACATTAG	fibroblast growth factor receptor 2
FGFR3	NM_022965.2	ACH;achondroplasia, thanatophoric dwarfism	GGACCTGTATATTTGTAAAGCTATTTATGGGCCCCTGGCACTCTTGTTCCCACACCCCAACACTTCCAGCATTTAGCTGGCCACATGGCGGAGAGTTTTA	fibroblast growth factor receptor 3
FGFR4	NM_002011.3		AGGCGAGGGCTGCTTTGGCCAGGTAGTACGTGCAGAGGCCTTTGGCATGGACCCTGCCCGGCCTGACCAAGCCAGCACTGTGGCCGTCAAGATGCTCAAA	fibroblast growth factor receptor 4
FGL2	NM_006682.2	fibrinogen-like 2	CAATTCAGCAGGATCGAGGAGGTGTTCAAAGAAGTCCAAAACCTCAAGGAAATCGTAAATAGTCTAAAGAAATCTTGCCAAGACTGCAAGCTGCAGGCTG	fibrinogen like 2
FHL1	NM_001449.4		CCAGTGTGGTGGCCTATGAAGGACAATCCTGGCACGACTACTGCTTCCACTGCAAAAAATGCTCCGTGAATCTGGCCAACAAGCGCTTTGTTTTCCACCA	four and a half LIM domains 1
FIGF	NM_004469.2	FIGF;c-fos induced growth factor (vascular endothelial growth factor D)	TGAACATGGACCAGTGAAGCGATCATCTCAGTCCACATTGGAACGATCTGAACAGCAGATCAGGGCTGCTTCTAGTTTGGAGGAACTACTTCGAATTACT	vascular endothelial growth factor D		VEGFD
FLI1	NM_001167681.2	Friend leukemia virus integration 1	GGGCCCTCCGTTATTACTATGATAAAAACATTATGACCAAAGTGCACGGCAAAAGATATGCTTACAAATTTGACTTCCACGGCATTGCCCAGGCTCTGCA	Fli-1 proto-oncogene, ETS transcription factor
FLT1	NM_002019.4	FLT;fms-related tyrosine kinase 1 (vascular endothelial growth factor/vascular permeability factor receptor),fms-related tyrosine kinase 1	AAGAAATGGCAAACAATTCTGCAGTACTTTAACCTTGAACACAGCTCAAGCAAACCACACTGGCTTCTACAGCTGCAAATATCTAGCTGTACCTACTTCA	fms related tyrosine kinase 1
FLT4	NM_002020.1	fms-related tyrosine kinase 4	CCAACAACGGCATCCAGCGATTTCGGGAGAGCACCGAGGTCATTGTGCATGAAAATCCCTTCATCAGCGTCGAGTGGCTCAAAGGACCCATCCTGGAGGC	fms related tyrosine kinase 4
FMOD	NM_002023.3		AAGGTGGATAAGACTTCAGAAGAGGAAAGGCCAGACTTTGCTTACCATCAGCATCTGCAATGGGCCAAACACACCTCAAATTGGCTGAGTTGAGAAAGCA	fibromodulin
FN1	NM_212482.1		GGGAATGGACATGCATTGCCTACTCGCAGCTTCGAGATCAGTGCATTGTTGATGACATCACTTACAATGTGAACGACACATTCCACAAGCGTCATGAAGA	fibronectin 1
FOXC2	NM_005251.2	FKHL14;forkhead box C2 (MFH-1, mesenchyme forkhead 1)	CCCCGGCCACACGTTCGCGGCCCAGCAGCAAACTTTCCCCAACGTGCGGGAGATGTTCAACTCCCACCGGCTGGGGATTGAGAACTCGACCCTCGGGGAG	forkhead box C2
FOXO4	NM_005938.2	MLLT7;myeloid/lymphoid or mixed-lineage leukemia (trithorax (Drosophila) homolog); translocated to, 7,myeloid/lymphoid or mixed-lineage leukemia (trithorax homolog, Drosophila); translocated to, 7	ATACAGTGCCTCAGGTTTAAAAGAGCAGGAAGCTGAGTGAGAGGTTGCAGAAAAAGTGTCTTCGCTCGGCAGAGGTTACAGGTGGCATCTCAGAAAGAGC	forkhead box O4
FRAS1	NM_001166133.1	Fraser syndrome 1	CTATCAGGATTCCTTGTTGGCGGATGCCACAATTTGGAAGCCCGATTCATGCCAGAGCTGCCGTTGCCATGGTGATATTGTTATCTGCAAACCTGCTGTT	Fraser extracellular matrix complex subunit 1
FREM1	NM_001177704.1	C9orf154;chromosome 9 open reading frame 154	GGGCTCCTGAAAAATGGCTGCTACGGGATTTACATCACTTCCCGCGTGTTGAAGGCATCAGACCCTGACACTGAGGACGATCAGATCATCTTTAAAATTC	FRAS1 related extracellular matrix 1
FREM2	NM_207361.4		CAAAGCTCAGCCAGAGACACAAGCGACCAGTTTTGGAAATGTCCTATTTAATGCCAAACTAGCAGTGGATGACCCTGAAGCCATTCTCTTAGTGAATCAG	FRAS1 related extracellular matrix protein 2
FST	NM_006350.2		GACCAATAATGCCTACTGTGTGACCTGTAATCGGATTTGCCCAGAGCCTGCTTCCTCTGAGCAATATCTCTGTGGGAATGATGGAGTCACCTACTCCAGT	follistatin
FSTL1	NM_007085.4	follistatin-like 1	CCATACTGCTAGTTAACCCAGTGTCCCTCAGACTTGGATGGAGTTTCTGGGAGGGTACACCCAAATGATGCAGATACTTGTATACTTTGAGCCCCTTAGC	follistatin like 1
FUT3	NM_000149.3	LE;fucosyltransferase 3 (galactoside 3(4)-L-fucosyltransferase, Lewis blood group included)	CTTATAGGGTACAGGTGGGATCGACTGTAAATGAGGACTTCTGGAACATTCCAAATATTCTGGGGTTGAGGGAAATTGCTGCTGTCTACAAAATGCCAAG	fucosyltransferase 3 (Lewis blood group)
FXYD6	NM_001164831.1	FXYD domain-containing ion transport regulator 6	CCTGATTTAGGGATGCGTAGGGTAAGAGCACGGGCAGTGGTCTTCAGTCGTCTTGGGACCTGGGAAGGTTTGCAGCACTTTGTCATCATTCTTCATGGAC	FXYD domain containing ion transport regulator 6
GALNT7	NM_017423.2	UDP-N-acetyl-alpha-D-galactosamine:polypeptide N-acetylgalactosaminyltransferase 7 (GalNAc-T7)	AAGGGAAGGTTTAATTCAAGCACGAAGTATTGGTGCTCAGAAGGCTAAACTTGGACAGGTTTTGATATACCTTGATGCCCACTGTGAGGTGGCAGTTAAC	polypeptide N-acetylgalactosaminyltransferase 7
GATA4	NM_002052.3	GATA-binding protein 4	GACTTCTTTCCCAAGATGTCCTTGTCCCCTGCGTTCCCCACTGTGGCCTAGACCGTGGGTTTTGCATTGTGTTTCTAGCACCGAGGATCTGAGAACAAGC	GATA binding protein 4
GDF15	NM_004864.2		ACTCCAGATTCCGAGAGTTGCGGAAACGCTACGAGGACCTGCTAACCAGGCTGCGGGCCAACCAGAGCTGGGAAGATTCGAACACCGACCTCGTCCCGGC	growth differentiation factor 15
GDF5	NM_000557.2		GACTTCAAGAGTCTCAGACTGAGGAGAAAGCCTTTCCTTCTGCTGCTACTGCTGCTGCCGCTGCTTTTGAAAGTCCACTCCTTTCATGGTTTTTCCTGCC	growth differentiation factor 5
GDF6	NM_001001557.2	SGM1;segmentation syndrome 1	AAACAATGTGGGAGGAAGAATCACCGTTGACGCATCTTGATTTGGTTGGTTTTTACATGTGTAAAGAAGGTGGGGTCTCTGGCCATGTCATAGCCCATGT	growth differentiation factor 6
GIMAP4	NM_018326.2		AACAGAACTTGTCGTAGTTGACACACCAGGCATTTTCGACACAGAGGTGCCCAATGCTGAAACGTCCAAGGAGATTATTCGCTGCATTCTTCTGACCTCC	GTPase, IMAP family member 4
GIMAP6	NR_024115.1		CTGCCTGGTTTATGGGAGAACTCTGAAGCCCATGATGTTTTCCTGGAAGGCTGTTCCTACAGACGGGGTTTATAAGTACTGATACTGGACAGGATGAGAA	GTPase, IMAP family member 6
GJA5	NM_005266.5	gap junction protein, alpha 5, 40kD (connexin 40),gap junction protein, alpha 5, 40kDa (connexin 40),gap junction protein, alpha 5, 40kDa	AACATCTGTCACCCTGCAGCTCCTTTACAGTTCAATCCAATGATAGAAACCATCCCTTCCCTTTCTCCCTTGGCTGTTCACCCAGCCATTCCCTGAAGGC	gap junction protein alpha 5
GLYR1	NM_032569.3	glyoxylate reductase 1 homolog (Arabidopsis)	CAGCATCTTCCTGGACCAGAAGTGCCAAAATATCCTGCAAGGAAACTTTAAGCCTGATTTCTACCTGAAATACATTCAGAAGGATCTCCGCTTAGCCATT	glyoxylate reductase 1 homolog
GPI	NM_000175.2	glucose phosphate isomerase	CAGTGCTCAAGTGACCTCTCACGACGCTTCTACCAATGGGCTCATCAACTTCATCAAGCAGCAGCGCGAGGCCAGAGTCCAATAAACTCGTGCTCATCTG	glucose-6-phosphate isomerase
GPR124	NM_032777.9	GPR124;G protein-coupled receptor 124	TGGCCGAGAGCCTCATCCACGACTGCACCTTCATCACCAGTGAGCTGACGCTGTCTCACATCGGCGTGTGGGCCTCAGGCGAGTGGGAGTGCACCGTGTC	adhesion G protein-coupled receptor A2		ADGRA2
GPR56	NM_005682.4	GPR56;G protein-coupled receptor 56	ACAAGAATTCCAGCCAAGTCCTGGGTGAGAAGGTCTTGGGGATTGTGGTACAGAACACCAAAGTAGCCAACCTCACGGAGCCCGTGGTGCTCACTTTCCA	adhesion G protein-coupled receptor G1		ADGRG1
GPX1	NM_000581.2		GGTTTTCATCTATGAGGGTGTTTCCTCTAAACCTACGAGGGAGGAACACCTGATCTTACAGAAAATACCACCTCGAGATGGGTGCTGGTCCTGTTGATCC	glutathione peroxidase 1
GREM1	NM_013372.5	CKTSF1B1,CRAC1;cysteine knot superfamily 1, BMP antagonist 1,gremlin 1, cysteine knot superfamily, homolog (Xenopus laevis),gremlin 1,colorectal adenoma and carcinoma 1	GTCCTGCTCCTTCTGCAAGCCCAAGAAATTCACTACCATGATGGTCACACTCAACTGCCCTGAACTACAGCCACCTACCAAGAAGAAGAGAGTCACACGT	gremlin 1, DAN family BMP antagonist
GRHL2	NM_024915.3	DFNA28,TFCP2L3;deafness, autosomal dominant 28,transcription factor CP2-like 3,grainyhead-like 2 (Drosophila)	GTTCTCTTTGAGGGGACAGGTTTAGGGGTTTGCGTTCGCCCTTGTGGGCTGAAGCACTAGCTTTTTGGTAGCTAGACACATCCTGCACCCAAAGGTTCTC	grainyhead like transcription factor 2
GSN	NM_000177.4	gelsolin (amyloidosis, Finnish type)	GATGGGAAAATCTTTGTCTGGAAAGGCAAGCAGGCAAACACGGAGGAGAGGAAGGCTGCCCTCAAAACAGCCTCTGACTTCATCACCAAGATGGACTACC	gelsolin
GTF2I	NM_033001.2	WBSCR6;general transcription factor II, i	TTAAGAGACCTTTTTTAGAGCCAAAGAAGCATGTAGGTGGTCGTGTGATGGTAACAGATGCTGACAGGTCAATACTATCTCCAGGTGGAAGTTGTGGCCC	general transcription factor IIi
GZMK	NM_002104.2	granzyme K (serine protease, granzyme 3; tryptase II),granzyme K (granzyme 3; tryptase II)	CTGTAAAGGTGTCTTCCACGCTATAGTCTCTGGAGGTCATGAATGTGGTGTTGCCACAAAGCCTGGAATCTACACCCTGTTAACCAAGAAATACCAGACT	granzyme K
HAPLN1	NM_001884.3	CRTL1;cartilage linking protein 1	GTGAGGTGATTGAAGGATTAGAAGATGATACTGTTGTGGTAGCACTGGACTTACAAGGTGTGGTATTCCCTTACTTTCCACGACTGGGGCGCTACAATCT	hyaluronan and proteoglycan link protein 1
HAS1	NM_001523.2	HAS	CTGGGTCAGCTTCCTAAGCAGCCTGCGATACTGGGTAGCCTTCAATGTGGAGCGGGCTTGTCAGAGCTACTTCCACTGTGTATCCTGCATCAGCGGTCCT	hyaluronan synthase 1
HDAC5	NM_005474.4		AGTGGTGATGCCCATTGCCCACGAGTTCTCACCTGATGTGGTCCTAGTCTCCGCCGGGTTTGATGCTGTTGAAGGACATCTGTCTCCTCTGGGTGGCTAC	histone deacetylase 5
HDHD3	NM_031219.2	C9orf158;chromosome 9 open reading frame 158,haloacid dehalogenase-like hydrolase domain containing 3	TGCTGTGAAGACATTTCCCAAGTGCTTCATGTTAGCCAGCAAATCTGACCCACAAGGCCTGGAAAGAGGTGATTGTTAGGTTGCGCAGAGGTGGTCTTAT	haloacid dehalogenase like hydrolase domain containing 3
HEG1	NM_020733.1	HEG homolog 1 (zebrafish),heart development protein with EGF-like domains 1	GAAGTAACATCTCATCCTATGACGGGGAATATGCTCAGCCTTCTACTGAGTCGCCAGTTCTGCATACATCCAACCTTCCGTCCTACACACCCACCATTAA	heart development protein with EGF like domains 1
HGF	NM_000601.4	DFNB39;deafness, autosomal recessive 39,hepatocyte growth factor (hepapoietin A; scatter factor)	TCATTGGTAAAGGACGCAGCTACAAGGGAACAGTATCTATCACTAAGAGTGGCATCAAATGTCAGCCCTGGAGTTCCATGATACCACACGAACACAGCTT	hepatocyte growth factor
HIF1A	NM_001530.2	hypoxia inducible factor 1, alpha subunit (basic helix-loop-helix transcription factor)	ATGGATGATGACTTCCAGTTACGTTCCTTCGATCAGTTGTCACCATTAGAAAGCAGTTCCGCAAGCCCTGAAAGCGCAAGTCCTCAAAGCACAGTTACAG	hypoxia inducible factor 1 alpha subunit
HIPK1	NM_152696.3		CAACAGACATTTATAGTATGTCCACCTGCGTTTCAAACTGGACTACAAGCAACAACAAAGCATTCTGGATTCCCTGTGAGGATGGATAATGCTGTACCGA	homeodomain interacting protein kinase 1
HIPK2	NM_022740.4	homeodomain-interacting protein kinase 2	GCGTGGCCTCATATTTCTATGAACCATTTAGTGATACTCCCGCTTCCTGCATGCCACACACTGTGCTGGGAATTGCTCATGGGTTGTCCTGTTTCATCTT	homeodomain interacting protein kinase 2
HK2	NM_000189.4		TCAGAATCAGGTTGACAGTCCCTTGCTGACATGGCTTTGCTTTGTGTAAATACAGTGGATCTCAATCTTCGGGGTGTGATGAATAGCGAATCATCTCAAA	hexokinase 2
HK3	NM_002115.1	hexokinase 3 (white cell)	ACTTTGCTGCCCACTGCCTGTCTGAGTTCCTGGATGCGCAGCCTGTGAACAAACAGGGTCTGCAGCTTGGCTTCAGCTTCTCTTTCCCTTGTCACCAGAC	hexokinase 3
HKDC1	NM_025130.3		GAGACAATGGCTGCATAGATGACATCCGGACCCGATACGACACGGAGGTGGATGAGGGGTCCTTGAATCCTGGCAAGCAGAGATACGAGAAAATGACCAG	hexokinase domain containing 1
HLA-DPB1	NM_002121.4	HLA-DP1B	TCCAAATTGGATACTGCTGCCAAGAAGTTGCTCTGAAGTCAGTTTCTATCATTCTGCTCTTTGATTCAAAGCACTGTTTCTCTCACTGGGCCTCCAACCA	major histocompatibility complex, class II, DP beta 1
HMOX1	NM_002133.2	heme oxygenase (decycling) 1	CAAGGACCAGAGCCCCTCACGGGCACCAGGGCTTCGCCAGCGGGCCAGCAACAAAGTGCAAGATTCTGCCCCCGTGGAGACTCCCAGAGGGAAGCCCCCA	heme oxygenase 1
HOXA5	NM_019102.2	HOX1C,HOX1;homeo box A5	TGAGCAGTATTAGCGGATCCCGCGTAGTGTCAGTACTAAGGTGACTTTCTGAAACTCCCTTGTGTTCCTTCTGTGAAGAAGCCCTGTTCTCGTTGCCCTA	homeobox A5
HOXA7	NM_006896.3	HOX1A,HOX1;homeo box A7	CTTCTGCTTAGCAGGACTGTGGAGATGCTTCCAGCTTCGCTGTCCTTTCCTCTGGCTCCTGTATCTTACTGTTCAGCTGTGTTAAATATGTACGCCCTGA	homeobox A7
HOXB13	NM_006361.5	homeo box B13	CCACCAGGGTTCCCAAAGAACCTGGCCCAGTCATAATCATTCATCCTGACAGTGGCAATAATCACGATAACCAGTACTAGCTGCCATGATCGTTAGCCTC	homeobox B13
HOXB3	NM_002146.4	HOX2,HOX2G;homeo box B3	TTTTTTTTTAAGGAAAAGTGTGGAGGCTAGGGCAGGCAGGTTGTTAGGACTGAAGGTTTGCCCATTCTGCTGCCTCCATCTCAGCTCCAGCTCCATCCCC	homeobox B3
HPSE	NM_006665.3		GGTCTAACTCTAAAGATGGTGGATGATCAAACCTTGCCACCTTTAATGGAAAAACCTCTCCGGCCAGGAAGTTCACTGGGCTTGCCAGCTTTCTCATATA	heparanase
HRAS	NM_005343.2	HRAS1;v-Ha-ras Harvey rat sarcoma viral oncogene homolog,Harvey rat sarcoma viral oncogene homolog	AGTACATGCGCACCGGGGAGGGCTTCCTGTGTGTGTTTGCCATCAACAACACCAAGTCTTTTGAGGACATCCACCAGTACAGGGAGCAGATCAAACGGGT	HRas proto-oncogene, GTPase
HSD17B12	NM_016142.2	hydroxysteroid (17-beta) dehydrogenase 12	GTGAAGTCTGCAATTAAAACAGTCGGCCTGCAATCCCGAACCAATGGATACCTGATCCATGCTCTTATGGGCTCGATAATCTCAAACCTGCCTTCTTGGA	hydroxysteroid 17-beta dehydrogenase 12
HSP90B1	NM_003299.1	TRA1;tumor rejection antigen (gp96) 1,heat shock protein 90kDa beta (Grp94), member 1	TCAGAGCTGACGATGAAGTTGATGTGGATGGTACAGTAGAAGAGGATCTGGGTAAAAGTAGAGAAGGATCAAGGACGGATGATGAAGTAGTACAGAGAGA	heat shock protein 90 beta family member 1
HSPB1	NM_001540.3	heat shock 27kD protein 1,heat shock 27kDa protein 1	AGCCGCGCGCTCAGCCGGCAACTCAGCAGCGGGGTCTCGGAGATCCGGCACACTGCGGACCGCTGGCGCGTGTCCCTGGATGTCAACCACTTCGCCCCGG	heat shock protein family B (small) member 1
HSPG2	NM_005529.5	SJS1;Schwartz-Jampel syndrome 1 (chondrodystrophic myotonia)	CCGCTGTAAGAACAATGTGGTGGGGCGCTTGTGCAATGAATGTGCTGACGGCTCTTTCCACCTGAGTACCCGAAACCCCGATGGCTGCCTCAAGTGCTTC	heparan sulfate proteoglycan 2
HUNK	NM_014586.1	hormonally upregulated Neu-associated kinase	GAGGCCAAATATTCAGCAGGCACTGGCGAATCGCTGGCTTAATGAGAATTACACGGGCAAAGTGCCCTGTAATGTCACCTATCCCAACAGGATTTCTCTG	hormonally up-regulated Neu-associated kinase
IBSP	NM_004967.3		AGGGGGAGTACGAATACACGGGCGCCAATGAATACGACAATGGATATGAAATCTATGAAAGTGAGAACGGGGAACCTCGTGGGGACAATTACCGAGCCTA	integrin binding sialoprotein
ICAM1	NM_000201.2		AAATACTGAAACTTGCTGCCTATTGGGTATGCTGAGGCCCCACAGACTTACAGAAGAAGTGGCCCTCCATAGACATGTGTAGCATCAAAACACAAAGGCC	intercellular adhesion molecule 1
ID1	NM_002165.2	inhibitor of DNA binding 1, dominant negative helix-loop-helix protein	CTGCCCCAGAACCGCAAGGTGAGCAAGGTGGAGATTCTCCAGCACGTCATCGACTACATCAGGGACCTTCAGTTGGAGCTGAACTCGGAATCCGAAGTTG	inhibitor of DNA binding 1, HLH protein
ID2	NM_002166.4	inhibitor of differentiation 2,inhibitor of DNA binding 2, dominant negative helix-loop-helix protein	CGGATATCAGCATCCTGTCCTTGCAGGCTTCTGAATTCCCTTCTGAGTTAATGTCAAATGACAGCAAAGCACTGTGTGGCTGAATAAGCGGTGTTCATGA	inhibitor of DNA binding 2
ID4	NM_001546.2	inhibitor of DNA binding 4, dominant negative helix-loop-helix protein	CGCCTGCGGAGGCTGGTGCCCACCATCCCGCCCAACAAGAAAGTCAGCAAAGTGGAGATCCTGCAGCACGTTATCGACTACATCCTGGACCTGCAGCTGG	inhibitor of DNA binding 4, HLH protein
IFNG	NM_000619.2		ATACTATCCAGTTACTGCCGGTTTGAAAATATGCCTGCAATCTGAGCCAGTGCTTTAATGGCATGTCAGACAGAACTTGAATGTGTCAGGTGACCCTGAT	interferon gamma
IGF1	NM_000618.3	insulin-like growth factor 1 (somatomedin C)	CGTGGATGAGTGCTGCTTCCGGAGCTGTGATCTAAGGAGGCTGGAGATGTATTGCGCACCCCTCAAGCCTGCCAAGTCAGCTCGCTCTGTCCGTGCCCAG	insulin like growth factor 1
IGFBP4	NM_001552.2	insulin-like growth factor-binding protein 4,insulin-like growth factor binding protein 4	TGGAGACACTCCTATAAGGAGAGTTCAAGCCTGTGGGAGTAGAAAAATCTCATTCCCAGAGTCAGAGGAGAAGAGACATGTACCTTGACCATCGTCCTTC	insulin like growth factor binding protein 4
IGFBP7	NM_001553.1	insulin-like growth factor binding protein 7	CCCAGAAAAGCATGAAGTAACTGGCTGGGTGCTGGTATCTCCTCTAAGTAAGGAAGATGCTGGAGAATATGAGTGCCATGCATCCAATTCCCAAGGACAG	insulin like growth factor binding protein 7
IL10RA	NM_001558.2	IL10R;interleukin 10 receptor, alpha	TGCCCAGCCCTCCGTCTGTGTGGTTTGAAGCAGAATTTTTCCACCACATCCTCCACTGGACACCCATCCCAAATCAGTCTGAAAGTACCTGCTATGAAGT	interleukin 10 receptor subunit alpha
IL11	NM_000641.2		TGAGACAGAGAACAGGGAATTAAATGTGTCATACATATCCACTTGAGGGCGATTTGTCTGAGAGCTGGGGCTGGATGCTTGGGTAACTGGGGCAGGGCAG	interleukin 11
IL13RA2	NM_000640.2	interleukin 13 receptor, alpha 2	AGATGGGTTTGATCTTAACAAGGGCATTGAAGCGAAGATACACACGCTTTTACCATGGCAATGCACAAATGGATCAGAAGTTCAAAGTTCCTGGGCAGAA	interleukin 13 receptor subunit alpha 2
IL15	NM_172174.1		AGGGTGATAGTCAAATTATGTATTGGTGGGGCTGGGTACCAATGCTGCAGGTCAACAGCTATGCTGGTAGGCTCCTGCCAGTGTGGAACCACTGACTACT	interleukin 15
IL18	NM_001562.2	interleukin 18 (interferon-gamma-inducing factor)	GACAGTCAGCAAGGAATTGTCTCCCAGTGCATTTTGCCCTCCTGGCTGCCAACTCTGGCTGCTAAAGCGGCTGCCACCTGCTGCAGTCTACACAGCTTCG	interleukin 18
IL1A	NM_000575.3	IL1	ACTCCATGAAGGCTGCATGGATCAATCTGTGTCTCTGAGTATCTCTGAAACCTCTAAAACATCCAAGCTTACCTTCAAGGAGAGCATGGTGGTAGTAGCA	interleukin 1 alpha
IL1B	NM_000576.2		GGGACCAAAGGCGGCCAGGATATAACTGACTTCACCATGCAATTTGTGTCTTCCTAAAGAGAGCTGTACCCAGAGAGTCCTGTGCTGAATGTGGACTCAA	interleukin 1 beta
IL1RL1	NM_016232.4		CCTCTTGAGTGGTTTAAGAATTGTCAGGCTCTTCAAGGATCAAGGTACAGGGCGCACAAGTCATTTTTGGTCATTGATAATGTGATGACTGAGGACGCAG	interleukin 1 receptor like 1
IL1RN	NM_000577.3		GAGTCTGCCGCCTGCCCCGGTTGGTTCCTCTGCACAGCGATGGAAGCTGACCAGCCCGTCAGCCTCACCAATATGCCTGACGAAGGCGTCATGGTCACCA	interleukin 1 receptor antagonist
IL6	NM_000600.1	IFNB2;interleukin 6 (interferon, beta 2)	TGACAAACAAATTCGGTACATCCTCGACGGCATCTCAGCCCTGAGAAAGGAGACATGTAACAAGAGTAACATGTGTGAAAGCAGCAAAGAGGCACTGGCA	interleukin 6
ILK	NM_004517.2	integrin-linked kinase	TCACACACTGGATGCCGTATGGATCCCTCTACAATGTACTACATGAAGGCACCAATTTCGTCGTGGACCAGAGCCAGGCTGTGAAGTTTGCTTTGGACAT	integrin linked kinase
INHBA	NM_002192.2	inhibin, beta A (activin A, activin AB alpha polypeptide),inhibin, beta A,inhibin beta A	GCGCTTCTGAACGCGATCAGAAAGCTTCATGTGGGCAAAGTCGGGGAGAACGGGTATGTGGAGATAGAGGATGACATTGGAAGGAGGGCAGAAATGAATG	inhibin beta A subunit
INHBE	NM_031479.3	inhibin, beta E	CTGGCTTATTCCAGGTTGGCTGATGTGTTGGGAGATGGGTAAAGCGTTTCTTCTAAAGGGGTCTACCCAGAAAGCATGATTTCCTGCCCTAAGTCCTGTG	inhibin beta E subunit
IRF6	NM_006147.2	VWS,LPS;Van der Woude syndrome	ATCTTGGTTCAGGTCATTCCAGTAGTGGCTCGGATGATCTACGAGATGTTTTCTGGTGATTTCACACGATCCTTTGATAGTGGCAGTGTCCGCCTGCAGA	interferon regulatory factor 6
ISL1	NM_002202.2	ISL1 transcription factor, LIM/homeodomain, (islet-1)	CTTACAGGCTAACCCAGTGGAAGTACAAAGTTACCAGCCACCTTGGAAAGTACTGAGCGACTTCGCCTTGCAGAGTGACATAGATCAGCCTGCTTTTCAG	ISL LIM homeobox 1
ISLR	NM_005545.3		TTTCTGATGATTTGGGGGCTTGGGAGTCCCTTTGTCCTCATCTGAGACTGAAATGTGGGGATCCAGGATGGCCTTCCTTCCTCTTACCCTTCCTCCCTCA	immunoglobulin superfamily containing leucine rich repeat
ITGA1	NM_181501.1	integrin, alpha 1	AAGTGGCAAGACTATAAGGAAAGAGTATGCACAACGTATTCCATCAGGTGGGGATGGTAAGACACTGAAATTTTTTGGCCAGTCTATCCACGGAGAAATG	integrin subunit alpha 1
ITGA11	NM_012211.3	integrin, alpha 11	CCTGAAAAAGTTTTACATTGGCCCAGGGCAGATCCAGGTTGGAGTTGTGCAGTATGGCGAAGATGTGGTGCATGAGTTTCACCTCAACGACTACAGGTCT	integrin subunit alpha 11
ITGA2	NM_002203.2	CD49B;integrin, alpha 2 (CD49B, alpha 2 subunit of VLA-2 receptor)	CAACGGGTGTGTGTTCTGACATCAGTCCTGATTTTCAGCTCTCAGCCAGCTTCTCACCTGCAACTCAGCCCTGCCCTTCCCTCATAGATGTTGTGGTTGT	integrin subunit alpha 2
ITGA3	NM_002204.2	MSK18;antigen identified by monoclonal antibody J143,integrin, alpha 3 (antigen CD49C, alpha 3 subunit of VLA-3 receptor)	TCCACAGAGAGGAGGGGACCAATTCTGGACAGACAGATGTTGGGAGGATACAGAGGAGATGCCACTTCTCACTCACCACTACCAGCCAGCCTCAGAAGGC	integrin subunit alpha 3
ITGA5	NM_002205.2	FNRA;integrin, alpha 5 (fibronectin receptor, alpha polypeptide)	AGAAGACTTTGTTGCTGGTGTGCCCAAAGGGAACCTCACTTACGGCTATGTCACCATCCTTAATGGCTCAGACATTCGATCCCTCTACAACTTCTCAGGG	integrin subunit alpha 5
ITGA6	NM_000210.1	integrin, alpha 6	CTCATGCGAGCCTTCATTGATGTGACTGCTGCTGCCGAAAATATCAGGCTGCCAAATGCAGGCACTCAGGTTCGAGTGACTGTGTTTCCCTCAAAGACTG	integrin subunit alpha 6
ITGA7	NM_002206.1	integrin, alpha 7	TGATAGTGGGTGCCCCCTACTTCTTTGAGCGCCAAGAAGAGCTGGGGGGTGCTGTGTATGTGTACTTGAACCAGGGGGGTCACTGGGCTGGGATCTCCCC	integrin subunit alpha 7
ITGA8	NM_003638.1	integrin, alpha 8	ATCGGAGTGCCTTTTGCAGGCAAGGATCAAAGAGGCAAAGTGCTCATTTATAATGGGAACAAAGATGGCTTAAACACCAAGCCTTCCCAAGTTCTGCAAG	integrin subunit alpha 8
ITGA9	NM_002207.2	integrin, alpha 9	CATGTCTCCAACCTCCTTTGTATATGGCGAGTCCGTGGACGCAGCCAACTTCATTCAGCTGGATGACCTGGAGTGTCACTTTCAGCCCATCAATATCACC	integrin subunit alpha 9
ITGAM	NM_000632.3	CR3A,CD11B;integrin, alpha M (complement component receptor 3, alpha; also known as CD11b (p170), macrophage antigen alpha polypeptide),integrin, alpha M (complement component 3 receptor 3 subunit)	GCCCTCCGAGGGTGTCCTCAAGAGGATAGTGACATTGCCTTCTTGATTGATGGCTCTGGTAGCATCATCCCACATGACTTTCGGCGGATGAAGGAGTTTG	integrin subunit alpha M
ITGB1	NM_033666.2	FNRB,MSK12,MDF2;integrin, beta 1 (fibronectin receptor, beta polypeptide, antigen CD29 includes MDF2, MSK12)	TTTTAACATTACCAAGGTAGAAAGTCGGGACAAATTACCCCAGCCGGTCCAACCTGATCCTGTGTCCCATTGTAAGGAGAAGGATGTTGACGACTGTTGG	integrin subunit beta 1
ITGB1BP1	NM_004763.3	integrin beta 1 binding protein 1	GGATTCATGCTGGTCTGGAACAGTGACATTGCCAACTTAAGACACACAAAGCAGATTTTCAGAAGTGTCTGGTCAAGATAACATGCTGGCCAACCACAAT	integrin subunit beta 1 binding protein 1
ITGB2	NM_001127491.1	CD18,MFI7;integrin, beta 2 (antigen CD18 (p95), lymphocyte function-associated antigen 1; macrophage antigen 1 (mac-1) beta subunit),integrin, beta 2 (complement component 3 receptor 3 and 4 subunit)	CAGCTGGCGCACAAGCTGGCTGAAAACAACATCCAGCCCATCTTCGCGGTGACCAGTAGGATGGTGAAGACCTACGAGAAACTCACCGAGATCATCCCCA	integrin subunit beta 2
ITGB3	NM_000212.2	GP3A;integrin, beta 3 (platelet glycoprotein IIIa, antigen CD61)	GAATAAGCCTTGGAATTAGATATGGGGCAATGACTGAGCCCTGTCTCACCCATGGATTACTCCTTACTGTAGGGAATGGCAGTATGGTAGAGGGATAAAT	integrin subunit beta 3
ITGB4	NM_001005731.1	integrin, beta 4	GGCCCATGTCCATCCCCATCATCCCTGACATCCCTATCGTGGACGCCCAGAGCGGGGAGGACTACGACAGCTTCCTTATGTACAGCGATGACGTTCTACG	integrin subunit beta 4
ITGB6	NM_000888.3	integrin, beta 6	AACATTCTCCAGCTGATCATCTCAGCTTATGAAGAACTGCGGTCTGAGGTGGAACTGGAAGTATTAGGAGACACTGAAGGACTCAACTTGTCATTTACAG	integrin subunit beta 6
ITGB7	NM_000889.1	integrin, beta 7	CAACGTGGTACAGCTCATCATGGATGCTTATAATAGCCTGTCTTCCACCGTGACCCTTGAACACTCTTCACTCCCTCCTGGGGTCCACATTTCTTACGAA	integrin subunit beta 7
ITGB8	NM_002214.2	integrin, beta 8	GGAAAACTGGAATTGTATGCAATGCCTTCACCCTCACAATTTGTCTCAGGCTATACTTGATCAGTGCAAAACCTCATGTGCTCTCATGGAACAACAGCAT	integrin subunit beta 8
ITM2A	NM_004867.4		CTTTGCAATAACAGAAAGTCCTTCCGCCTTCGTCGCAGAGACCTCTTGCTGGGTTTCAACAAACGTGCCATTGATAAATGCTGGAAGATTAGACACTTCC	integral membrane protein 2A
JAG1	NM_000214.2	AGS,JAGL1;Alagille syndrome	TTGCTTGTGGAGGCGTGGGATTCCAGTAATGACACCGTTCAACCTGACAGTATTATTGAAAAGGCTTCTCACTCGGGCATGATCAACCCCAGCCGGCAGT	jagged 1
JAM2	NM_001270407.1	C21orf43	CCATCATGTGAAGTACCCTCTTCTGCTCTGAGTGGAACTGTGGTAGAGCTACGATGTCAAGACAAAGAAGGGAATCCAGCTCCTGAATACACATGGTTTA	junctional adhesion molecule 2
JAM3	NM_032801.3		AATTATTGGGGGGGTTCTGGTTGTCCTTGCTGTACTGGCCCTGATCACGTTGGGCATCTGCTGTGCATACAGACGTGGCTACTTCATCAACAATAAACAG	junctional adhesion molecule 3
JUN	NM_002228.3	v-jun avian sarcoma virus 17 oncogene homolog,jun oncogene	ACACAGCCAGCCAGCCAGGTCGGCAGTATAGTCCGAACTGCAAATCTTATTTTCTTTTCACCTTCTCTCTAACTGCCCAGAGCTAGCGCCTGTGGCTCCC	Jun proto-oncogene, AP-1 transcription factor subunit
KCNJ8	NM_004982.2	potassium inwardly-rectifying channel, subfamily J, member 8	AGCTCAGGCTCACAGAAGGGCAGAAACTTTGATTTTCAGCCGCCATGCTGTGATTGCCGTCCGAAATGGCAAGCTGTGCTTCATGTTCCGAGTGGGTGAC	potassium voltage-gated channel subfamily J member 8
KDM1A	NM_015013.3	AOF2,KDM1;amine oxidase (flavin containing) domain 2,lysine (K)-specific demethylase 1	TCGTTGGCGTGCTGATCCCTGGGCTCGGGGCTCTTATTCCTATGTTGCTGCAGGATCATCTGGAAATGACTATGATTTAATGGCTCAGCCAATCACTCCT	lysine demethylase 1A
KDR	NM_002253.2	kinase insert domain receptor (a type III receptor tyrosine kinase)	CAATCACACAATTAAAGCGGGGCATGTACTGACGATTATGGAAGTGAGTGAAAGAGACACAGGAAATTACACTGTCATCCTTACCAATCCCATTTCAAAG	kinase insert domain receptor
KIAA1462	NM_020848.2	KIAA1462;KIAA1462	AAATGACTTATTCTGACAGCATCTCGGTTTGGGGCTTCTGAAGAAAAAGGATGAAGCTGATCTGTTGAAACAACTACTTTCCCAACTCGGAGGCAAAAGG	junctional cadherin 5 associated		JCAD
KISS1	NM_002256.3		ACTTCTAGGACCTGCCTCTTCTCACCAAGATGAACTCACTGGTTTCTTGGCAGCTACTGCTTTTCCTCTGTGCCACCCACTTTGGGGAGCCATTAGAAAA	KiSS-1 metastasis suppressor
KLK3	NM_001030049.1	APS;kallikrein 3, (prostate specific antigen)	GTGTGTGGACCTCCATGTTATTTCCAATGACGTGTGTGCGCAAGTTCACCCTCAGAAGGTGACCAAGTTCATGCTGTGTGCTGGACGCTGGACAGGGGGC	kallikrein related peptidase 3
KRAS	NM_004985.3	KRAS2;v-Ki-ras2 Kirsten rat sarcoma 2 viral oncogene homolog,v-Ki-ras2 Kirsten rat sarcoma viral oncogene homolog,Kirsten rat sarcoma viral oncogene homolog	AACCTGTCTCTTGGATATTCTCGACACAGCAGGTCAAGAGGAGTACAGTGCAATGAGGGACCAGTACATGAGGACTGGGGAGGGCTTTCTTTGTGTATTT	KRAS proto-oncogene, GTPase
KRIT1	NM_004912.3	CCM1;cerebral cavernous malformations 1	CTGTTACCAAACTGAAAAGTAAGGCACCTCACTGGACAAATCGCATACTTCATGAATACAAGAATCTCAGTACAAGTGAAGGTGTCAGTAAAGAAATGCA	KRIT1, ankyrin repeat containing
KRT1	NM_006121.2	EHK1;epidermolytic hyperkeratosis 1,keratin 1, type II	TGCAGCAGGTAGATACCTCCACTAGAACCCATAATTTAGAGCCCTACTTTGAGTCATTCATCAACAATCTCCGAAGGAGAGTGGACCAACTGAAGAGTGA	keratin 1
KRT14	NM_000526.4	EBS3,EBS4;keratin 14 (epidermolysis bullosa simplex, Dowling-Meara, Koebner),keratin 14, type I	CGGCCTGCTGAGATCAAAGACTACAGTCCCTACTTCAAGACCATTGAGGACCTGAGGAACAAGATTCTCACAGCCACAGTGGACAATGCCAATGTCCTTC	keratin 14
KRT19	NM_002276.4	keratin 19, type I	CGCAGCTTCTGAGACCAGGGTTGCTCCGTCCGTGCTCCGCCTCGCCATGACTTCCTACAGCTATCGCCAGTCGTCGGCCACGTCGTCCTTCGGAGGCCTG	keratin 19
KRT7	NM_005556.3	keratin 7, type II	GGGAACCATGGGCAGCAATGCCCTGAGCTTCTCCAGCAGTGCGGGTCCTGGGCTCCTGAAGGCTTATTCCATCCGGACCGCATCCGCCAGTCGCAGGAGT	keratin 7
LAD1	NM_005558.3		ACAGCAGCACCCTTTCCTCTCATTGTCCCTGTTCCCTTTTTGCCTGTGGATCTGTTTGGCCAGGGTCCCTGGGGTCAGGAATATTTGCAAGACTCAGCCA	ladinin 1
LAMA1	NM_005559.2	LAMA;laminin, alpha 1	CAGTTGCACCAAAATGCCACCCTTGAACTCAAGGCTGCTGAAGATTTATTGTCACAAATTCAGGAAAATTACCAGAAGCCGCTGGAAGAATTGGAGGTAT	laminin subunit alpha 1
LAMA3	NM_000227.3	LAMNA;laminin, alpha 3 (nicein (150kD), kalinin (165kD), BM600 (150kD), epilegrin),laminin, alpha 3	CAGAGGACTGGTGTTTCACACGGGCACTAAGAACTCCTTTATGGCTCTTTATCTTTCAAAAGGACGTCTGGTCTTTGCACTGGGGACAGATGGGAAAAAA	laminin subunit alpha 3
LAMA4	NM_001105209.1	laminin, alpha 4	CCGAGCCCTGGAAGAGCACTACTGGATGTCAGCGGAGAAATGGCTTTGAGCTCAGCCTGGCGCTCGGTTCTGCCTCTGTGGCTCCTCTGGAGCGCTGCCT	laminin subunit alpha 4
LAMA5	NM_005560.3	laminin, alpha 5	GCCATGAATTTCTCCTACTCGCCGCTGCTACGTGAGTTCACCAAGGCCACCAACGTCCGCCTGCGCTTCCTGCGTACCAACACGCTGCTGGGCCATCTCA	laminin subunit alpha 5
LAMB3	NM_000228.2	LAMNB1;laminin, beta 3 (nicein (125kD), kalinin (140kD), BM600 (125kD)),laminin, beta 3	AAATGGGGGGAAGGTCCAACTTAACCTTATGGATTTAGTGTCTGGGATTCCAGCAACTCAAAGTCAAAAAATTCAAGAGGTGGGGGAGATCACAAACTTG	laminin subunit beta 3
LAMC1	NM_002293.3	LAMB2;laminin, gamma 1 (formerly LAMB2)	TCTTGATAGGAAAGTGTCTGACCTGGAGAATGAAGCCAAGAAGCAGGAGGCTGCCATCATGGACTATAACCGAGATATCGAGGAGATCATGAAGGACATT	laminin subunit gamma 1
LAMC2	NM_005562.2	EBR2,LAMB2T,LAMNB2,EBR2A;laminin, gamma 2 (nicein (100kD), kalinin (105kD), BM600 (100kD), Herlitz junctional epidermolysis bullosa)),laminin, gamma 2	CAAGCGGAAATTGAAGCAGATAGGTCTTATCAGCACAGTCTCCGCCTCCTGGATTCAGTGTCTCGGCTTCAGGGAGTCAGTGATCAGTCCTTTCAGGTGG	laminin subunit gamma 2
LDHA	NM_001165414.1		AACTTCCTGGCTCCTTCACTGAACATGCCTAGTCCAACATTTTTTCCCAGTGAGTCACATCCTGGGATCCAGTGTATAAATCCAATATCATGTCTTGTGC	lactate dehydrogenase A
LEFTY1	NM_020997.2	LEFTB;left-right determination, factor B	GCACTATATTCTAAGCACTTACATGTGGAGATACTGTAACCTGAGGGCAGAAAGCCCAATGTGTCATTGTTTACTTGTCCTGTCACTGGATCTGGGCTAA	left-right determination factor 1
LGALS1	NM_002305.3	lectin, galactoside-binding, soluble, 1	GGTGCGCCTGCCCGGGAACATCCTCCTGGACTCAATCATGGCTTGTGGTCTGGTCGCCAGCAACCTGAATCTCAAACCTGGAGAGTGCCTTCGAGTGCGA	galectin 1
LHFP	NM_005780.2	LHFP;lipoma HMGIC fusion partner	TGCAGTCCCTGAACACTTACTTGGGGTCCTCATTGCCCTATCTGGTGAAAGATGGCATCCAGCCTGACTTGTACTGGAGTAATCTGGGCTTTGCTGTCTT	LHFPL tetraspan subfamily member 6		LHFPL6
LIFR	NM_002310.3	leukemia inhibitory factor receptor,leukemia inhibitory factor receptor alpha	CCTATTGTCCACCCATCATTGAGGAAGAAATACCAAACCCAGCCGCAGATGAAGCTGGAGGGACTGCACAGGTTATTTACATTGATGTTCAGTCGATGTA	LIF receptor alpha
LLGL2	NM_001015002.1	lethal giant larvae homolog 2 (Drosophila),lethal giant larvae homolog 2, scribble cell polarity complex component	GCCACGGGCCAGCTACGGGGACCGCCACTGCATCTCAGTGATCCACGATGGCCAGCAGACGGCCTTCGACTTCACCTCCCGTGTCATCGGCTTCACTGTC	LLGL2, scribble cell polarity complex component
LOX	NM_002317.4		CGCTACACAGGACATCATGCGTATGCCTCAGGCTGCACAATTTCACCGTATTAGAAGGCAAAGCAAAACTCCCAATGGATAAATCAGTGCCTGGTGTTCT	lysyl oxidase
LOXL2	NM_002318.2	lysyl oxidase-like 2	GGTTTGCCATCCTCCTCTAGTTAAAAGTAAGGGGGAAAAGAGTAAACGCGCGACTCCAGCGCGCGGCTACCTACGCTTGGTGCTTGCTTTCTCCAGCCAT	lysyl oxidase like 2
LRG1	NM_052972.2		GCTGGGACCCCGTTTCATCCATCCATGCTTCCTAGAACACACGATGGGCTTTCCTTACCCATGCCCAAGGTGTGCCCTCCGTCTGGAATGCCGTTCCCTG	leucine rich alpha-2-glycoprotein 1
LTBP4	NM_003573.2		AGACGTGGACGAATGTCAGCTCTTCCGAGACCAGGTGTGCAAGAGTGGCGTGTGTGTGAACACGGCCCCGGGCTACTCATGCTATTGCAGCAACGGCTAC	latent transforming growth factor beta binding protein 4
LUM	NM_002345.3	LDC	GCCATTATCCTACTCCAAGATCAAGCATTTGCGTTTGGATGGCAATCGCATCTCAGAAACCAGTCTTCCACCGGATATGTATGAATGTCTACGTGTTGCT	lumican
LY96	NM_015364.2		AGAAGTTATTTGCCGAGGATCTGATGACGATTACTCTTTTTGCAGAGCTCTGAAGGGAGAGACTGTGAATACAACAATATCATTCTCCTTCAAGGGAATA	lymphocyte antigen 96
MAF	NM_005360.4	v-maf avian musculoaponeurotic fibrosarcoma oncogene homolog	TAATGACTTCGATCTGATGAAGTTTGAAGTGAAAAAGGAACCGGTGGAGACCGACCGCATCATCAGCCAGTGCGGCCGTCTCATCGCCGGGGGCTCGCTG	MAF bZIP transcription factor
MAP2K1	NM_002755.2	PRKMK1	ACGGAATGGACAGCCGACCTCCCATGGCAATTTTTGAGTTGTTGGATTACATAGTCAACGAGCCTCCTCCAAAACTGCCCAGTGGAGTGTTCAGTCTGGA	mitogen-activated protein kinase kinase 1
MAP2K2	NM_030662.3	PRKMK2	AAGCCCTCCAACATCCTCGTGAACTCTAGAGGGGAGATCAAGCTGTGTGACTTCGGGGTGAGCGGCCAGCTCATCGACTCCATGGCCAACTCCTTCGTGG	mitogen-activated protein kinase kinase 2
MAP2K4	NM_003010.2	SERK1	TTGTATGACAGTGAAGCAGCACTGTGAGTGGTTCAAGCACACTGGAATATAAAACAGTCATGGCCTGAGATGCAGGTGATGCCATTACAGAACCAAATCG	mitogen-activated protein kinase kinase 4
MAP3K7	NM_145333.1	TAK1	GCCATATTATACTGCTGCCCACGCAATGAGTTGGTGTTTACAGTGTTCCCAAGGAGTGGCTTATCTTCACAGCATGCAACCCAAAGCGCTAATTCACAGG	mitogen-activated protein kinase kinase kinase 7
MAPK1	NM_138957.2	PRKM2,PRKM1	ACTGCCAGAGAACCCTGAGGGAGATAAAAATCTTACTGCGCTTCAGACATGAGAACATCATTGGAATCAATGACATTATTCGAGCACCAACCATCGAGCA	mitogen-activated protein kinase 1
MAPK3	NM_001040056.1	PRKM3	AACGTGCTCCACCGAGATCTAAAGCCCTCCAACCTGCTCATCAACACCACCTGCGACCTTAAGATTTGTGATTTCGGCCTGGCCCGGATTGCCGATCCTG	mitogen-activated protein kinase 3
MAPKAPK3	NM_004635.3		GTGTATGAGAACATGCACCATGGCAAGCGCTGTCTCCTCATCATCATGGAATGCATGGAAGGTGGTGAGTTGTTCAGCAGGATTCAGGAGCGTGGCGACC	mitogen-activated protein kinase-activated protein kinase 3
MCAM	NM_006500.2		TGCTGCCACCACCCTCCTGTCTGCCTCTTCAAAGTCTCCTGTGACATTTTTTCTTTGGTCAGAAGCCAGGAACTGGTGTCATTCCTTAAAAGATACGTGC	melanoma cell adhesion molecule
MED1	NM_004774.3	TRIP2,PPARGBP,PPARBP;PPAR binding protein	CCCTTGGATAAGATTCTTCATGGAAGTGTTGGCTATCTCACACCAAGGAGTGGGGGTCATTTAATGAACCTGAAGTACTATGTCTCTCCTTCTGACCTAC	mediator complex subunit 1
MED23	NM_004830.2	CRSP3;cofactor required for Sp1 transcriptional activation, subunit 3, 130kDa	TTGTACAGCAGCTTCTGGCAGCAAGAGAGGTTATAGCATATATCTTGGAAAGAAATGCCTGCTTATTACCAGCCTATTTTGCAGTCACTGAGATCAGGAA	mediator complex subunit 23
MEG3	NR_002766.2	maternally expressed 3	ATCTTCCTATCCTTTTCTGGGGGAATGGGGTCGATGAGAGCAACCTCCTAGGGTTGTTGTGAGAATTAAATGAGATAAAAGAGGCCTCAGGCAGGATCTG	maternally expressed 3 (non-protein coding)
MEOX2	NM_005924.4	GAX;mesenchyme homeo box 2 (growth arrest-specific homeo box),mesenchyme homeobox 2 (growth arrest-specific homeo box)	GCGCACTTATGATATAAACAGAGGACCAGCTCCATTCTCAGGAAAGAAATGTTGTGATGGCAAGCCTTACCCAAATATCGTTTACACAGAGAGATGACTA	mesenchyme homeobox 2
MET	NM_001127500.1	met proto-oncogene	GGCTGACCATATGTGGCTGGGACTTTGGATTTCGGAGGAATAATAAATTTGATTTAAAGAAAACTAGAGTTCTCCTTGGAAATGAGAGCTGCACCTTGAC	MET proto-oncogene, receptor tyrosine kinase
MFAP4	NM_002404.1	microfibrillar associated protein 4	AACATGCACCTCCTGACACTGAAGCAGAAGTATGAGCTGCGAGTGGACTTGGAGGACTTTGAGAACAACACGGCCTATGCCAAGTACGCTGACTTCTCCA	microfibril associated protein 4
MGAT5	NM_002410.4		TGGACCATCCTGGGTTCATTACCAGTGCATGCTCCGAGTCCTTGATTCATTTGGTACTGAACCCGAATTTAATCATGCAAATTATGCCCAATCGAAAGGC	mannosyl (alpha-1,6-)-glycoprotein beta-1,6-N-acetyl-glucosaminyltransferase
MGP	NM_000900.2		TCAATAGGGAAGCCTGTGATGACTACAGACTTTGCGAACGCTACGCCATGGTTTATGGATACAATGCTGCCTATAATCGCTACTTCAGGAAGCGCCGAGG	matrix Gla protein
MISP	NM_173481.2	C19orf21;chromosome 19 open reading frame 21	GCTCCTCCCAGGCATCCGGCATCACGGGCAGTTACTCGGTGTCTGAGTCTCCCTTCTTCAGCCCCATCCACCTACACTCAAACGTGGCGTGGACAGTGGA	mitotic spindle positioning
MMP1	NM_002421.2	CLG;matrix metalloproteinase 1 (interstitial collagenase)	CAACTTACATCGTGTTGCGGCTCATGAACTCGGCCATTCTCTTGGACTCTCCCATTCTACTGATATCGGGGCTTTGATGTACCCTAGCTACACCTTCAGT	matrix metallopeptidase 1
MMP10	NM_002425.1	STMY2;matrix metalloproteinase 10 (stromelysin 2),stromelysin 2	GCAGCAAAAGAGGAGGACTCCAACAAGGATCTTGCCCAGCAATACCTAGAAAAGTACTACAACCTCGAAAAGGATGTGAAACAGTTTAGAAGAAAGGACA	matrix metallopeptidase 10
MMP12	NM_002426.3	matrix metalloproteinase 12 (macrophage elastase)	ATGTTGACATCAACACATTTCGCCTCTCTGCTGATGACATACGTGGCATTCAGTCCCTGTATGGAGACCCAAAAGAGAACCAACGCTTGCCAAATCCTGA	matrix metallopeptidase 12
MMP13	NM_002427.2	matrix metalloproteinase 13 (collagenase 3)	CTGGCGCCTGCATCCTCAGCAGGTTGATGCGGAGCTGTTTTTAACGAAATCATTTTGGCCAGAACTTCCCAACCGTATTGATGCTGCATATGAGCACCCT	matrix metallopeptidase 13
MMP14	NM_004995.2	matrix metalloproteinase 14 (membrane-inserted),matrix metallopeptidase 14 (membrane-inserted)	GACAAGATTGATGCTGCTCTCTTCTGGATGCCCAATGGAAAGACCTACTTCTTCCGTGGAAACAAGTACTACCGTTTCAACGAAGAGCTCAGGGCAGTGG	matrix metallopeptidase 14
MMP17	NM_016155.4	matrix metalloproteinase 17 (membrane-inserted),matrix metallopeptidase 17 (membrane-inserted)	GATGCCCACGGGATGGACCTGTTTGCAGTGGCTGTCCACGAGTTTGGCCACGCCATTGGGTTAAGCCATGTGGCCGCTGCACACTCCATCATGCGGCCGT	matrix metallopeptidase 17
MMP2	NM_004530.2	CLG4,CLG4A;matrix metalloproteinase 2 (gelatinase A, 72kDa gelatinase, 72kDa type IV collagenase)	CCCGGAGGGGCCTGGCAGCCGTGCCTTCAGCTCTACAGCTAATCAGCATTCTCACTCCTACCTGGTAATTTAAGATTCCAGAGAGTGGCTCCTCCCGGTG	matrix metallopeptidase 2
MMP24	NM_006690.3	matrix metalloproteinase 24 (membrane-inserted),matrix metallopeptidase 24 (membrane-inserted)	TGCCCGCATCGACGCAGCCTATGAAAGGGCCGATGGGAGATTTGTCTTCTTCAAAGGTGACAAGTATTGGGTGTTTAAGGAGGTGACGGTGGAGCCTGGG	matrix metallopeptidase 24
MMP3	NM_002422.3	STMY1,STMY;matrix metalloproteinase 3 (stromelysin 1, progelatinase),stromelysin 1	AGGCATAGAGACAACATAGAGCTAAGTAAAGCCAGTGGAAATGAAGAGTCTTCCAATCCTACTGTTGCTGTGCGTGGCAGTTTGCTCAGCCTATCCATTG	matrix metallopeptidase 3
MMP9	NM_004994.2	CLG4B;matrix metalloproteinase 9 (gelatinase B, 92kDa gelatinase, 92kDa type IV collagenase)	CACTACTGTGCCTTTGAGTCCGGTGGACGATGCCTGCAACGTGAACATCTTCGACGCCATCGCGGAGATTGGGAACCAGCTGTATTTGTTCAAGGATGGG	matrix metallopeptidase 9
MMRN2	NM_024756.2	EMILIN3;elastin microfibril interfacer 3	GCCAAGGATGGGCTGGAGGTCATTCAGTTGGTCTGTCTCTTCCCTGGAAACCTTCTGCAAAGATGGTGTGGTGTACGTGGCTTCCCTGTAACCACATGGG	multimerin 2
MPDZ	NM_003829.4	multiple PDZ domain protein	GTCTATTACACTAGAGCGAGGACCAGATGGCTTAGGCTTCAGTATAGTTGGAGGATATGGCAGCCCTCATGGAGACTTACCCATTTATGTTAAAACAGTG	multiple PDZ domain crumbs cell polarity complex component
MRC1	NM_002438.2	MRC1L1;mannose receptor, C type 1-like 1,mannose receptor, C type 1	TATTGATCAGCTTGGATAAAAAGTTTGCTTGGATGGATGGAAGCAAAGTGGATTACGTGTCTTGGGCCACAGGTGAACCCAATTTTGCAAATGAAGATGA	mannose receptor C-type 1
MS4A4A	NM_024021.2	MS4A4;membrane-spanning 4-domains, subfamily A, member 4,membrane-spanning 4-domains, subfamily A, member 4A	GTTTGAGGCCACCAAAAGATCAACAGACAAATGCTCCAGAAATCTATGCTGACTGTGACACAAGAGCCTCACATGAGAAATTACCAGTATCCAACTTCGA	membrane spanning 4-domains A4A
MS4A6A	NM_152852.2	MS4A6;membrane-spanning 4-domains, subfamily A, member 6A	GAACAGACTTGCCTAACAACAGGAAACTTGTATGTCTCGAAGTGGCAATTCACACATAAGGCTCCATGACTCCTGAACTCTCACAAATATTAGTTGGCTC	membrane spanning 4-domains A6A
MT3	NM_005954.2	metallothionein 3 (growth inhibitory factor (neurotrophic))	CACTAGCCAAGCCGCGCGTCCAGTTGCTTGGAGAAGCCCGTTCACCGCCTCCAGCTGCTGCTCTCCTCGACATGGACCCTGAGACCTGCCCCTGCCCTTC	metallothionein 3
MTA1	NM_004689.2		CTATTCTCTAGTCTACGACCCACAGCAGAAGACCCTGCTGGCAGATAAAGGAGAGATTCGAGTAGGAAACCGGTACCAGGCAGACATCACCGACTTGTTA	metastasis associated 1
MTBP	NM_022045.4	MDM2 (mouse double minute 2)-binding protein, 104kD,Mdm2, transformed 3T3 cell double minute 2, p53 binding protein (mouse) binding protein, 104kDa	AAAATGAGAACTGGTTCATTACCTCATTCATCTGAACAGTTGCTGGGCCACAAAGAGGGTCCTCGGGACTCAATCACATTGTTGGATGCTAAAGAATTGC	MDM2 binding protein
MTDH	NM_178812.3		GAAATCAAAGTCAGATGCTAAAGCAGTGCAAAACAGTTCACGCCATGATGGAAAGGAAGTTGATGAAGGAGCCTGGGAAACTAAAATTAGTCACAGAGAG	metadherin
MTOR	NM_004958.2	FRAP,FRAP2,FRAP1;FK506 binding protein 12-rapamycin associated protein 1,mechanistic target of rapamycin (serine/threonine kinase),mechanistic target of rapamycin	TTAGTGTTGCTCCTGGGAGTTGATCCGTCTCGGCAACTTGACCATCCTCTGCCAACAGTTCACCCTCAGGTGACCTATGCCTACATGAAAAACATGTGGA	mechanistic target of rapamycin kinase
MUC1	NM_001018017.1	PUM,MCKD1;mucin 1, transmembrane,medullary cystic kidney disease 1 (autosomal dominant)	CCCTAGCAGTACCGATCGTAGCCCCTATGAGAAGGTTTCTGCAGGTAATGGTGGCAGCAGCCTCTCTTACACAAACCCAGCAGTGGCAGCCACTTCTGCC	mucin 1, cell surface associated
MYC	NM_002467.3	v-myc avian myelocytomatosis viral oncogene homolog	TCGGACACCGAGGAGAATGTCAAGAGGCGAACACACAACGTCTTGGAGCGCCAGAGGAGGAACGAGCTAAAACGGAGCTTTTTTGCCCTGCGTGACCAGA	MYC proto-oncogene, bHLH transcription factor
MYCL	NM_001033081.2	MYCL1;v-myc avian myelocytomatosis viral oncogene homolog 1, lung carcinoma derived	GCAGGGAGCGGACATGGACTACGACTCGTACCAGCACTATTTCTACGACTATGACTGCGGGGAGGATTTCTACCGCTCCACGGCGCCCAGCGAGGACATC	MYCL proto-oncogene, bHLH transcription factor
MYH11	NM_001040113.1	myosin, heavy polypeptide 11, smooth muscle	CTGCTAGAAAAATCACGGGCAATTCGCCAAGCCAGAGACGAGAGGACATTCCACATCTTTTACTACATGATTGCTGGAGCCAAGGAGAAGATGAGAAGTG	myosin heavy chain 11
MYLK	NM_053032.2	myosin, light polypeptide kinase	ATTATTAGTGATGTTTGCGGGGATGACGATGCCAAGTACACCTGCAAGGCTGTCAACAGTCTTGGAGAAGCCACCTGCACAGCAGAGCTCATTGTGGAAA	myosin light chain kinase
MYO1D	NM_015194.1		ATTCTTTCTATCAGCTACTCCAAGGAGGTTCAGAACAAATGCTACGCTCTCTACATCTCCAGAAATCCCTTTCATCCTACAACTATATTCATGTGGGAGC	myosin ID
MYO5C	NM_018728.2		AACTGAGGCAGAGTTGTGTTATGGTACAAAAGCACATGCGTGGCTGGCTCCAGAGGAAAAAATTCCTCCGAGAGAGACGAGCCGCCCTGATAATCCAGCA	myosin VC
NAA15	NM_057175.3	NARG1;NMDA receptor regulated 1	GTGGAAACAGAGGTGCAAGCCAGAGGCAATGTAATATGCTGTAAGGCTAGTGCAGATGGGAGCTTTTTAGAAGGGGCTAAGTGCTGGTGTCAGGGAAATT	N(alpha)-acetyltransferase 15, NatA auxiliary subunit
NAP1L3	NM_004538.4	nucleosome assembly protein 1-like 3	CCCCAGGTAAAGGCAGATGATAAAGAACAGCCTAAAGCAACAGAGGCTAAGGCAAGGGCTGCAGTAAGAGAGACTCATAAAAGAGTTCCTGAGGAAAGGC	nucleosome assembly protein 1 like 3
NCAM1	NM_000615.5		GGTATTTGCCTATCCCAGTGCCACGATCTCATGGTTTCGGGATGGCCAGCTGCTGCCAAGCTCCAATTACAGCAATATCAAGATCTACAACACCCCCTCT	neural cell adhesion molecule 1
NCL	NM_005381.2		GAACAGAGATCGATGGGCGATCTATTTCCCTGTACTATACTGGAGAGAAAGGTCAAAATCAAGACTATAGAGGTGGAAAGAATAGCACTTGGAGTGGTGA	nucleolin
NDNF	NM_024574.3	C4orf31;chromosome 4 open reading frame 31	TCCAGGCTTCTCGTTCCTGGATATTGGTGCTTAGCATCTTGGCAGGGTCCGGGGACGTGGACTATTTCGCACACCACACCACGGGGAGGGATTTTTTTCT	neuron derived neurotrophic factor
NDP	NM_000266.2	EVR2;exudative vitreoretinopathy 2 (X-linked),Norrie disease (pseudoglioma)	AGAAAACATGTACTAGCTGCATCCTTTTCTATGCTCTCCCTGCTGGTGATAATGGGAGATACAGACAGTAAAACGGACAGCTCATTCATAATGGACTCGG	NDP, norrin cystine knot growth factor
NDRG1	NM_006096.2	CAP43	CGCCTACATCCTAACTCGATTTGCTCTAAACAACCCTGAGATGGTGGAGGGCCTTGTCCTTATCAACGTGAACCCTTGTGCGGAAGGCTGGATGGACTGG	N-myc downstream regulated 1
NF1	NM_000267.2		TACCAGATCCCACAGACTGATATGGCTGAATGTGCAGAAAAGCTATTTGACTTGGTGGATGGTTTTGCTGAAAGCACCAAACGTAAAGCAGCAGTTTGGC	neurofibromin 1
NF2	NM_181825.2	neurofibromin 2 (bilateral acoustic neuroma),neurofibromin 2 (merlin)	CATGGCCGGGGCCATCGCTTCCCGCATGAGCTTCAGCTCTCTCAAGAGGAAGCAACCCAAGACGTTCACCGTGAGGATCGTCACCATGGACGCCGAGATG	neurofibromin 2
NFAT5	NM_173214.1	nuclear factor of activated T-cells 5, tonicity-responsive,nuclear factor of activated T-cells 5	CCCTGACAACTATTCAAACCCAGGACATCTCACAGCCTGGTACTTTTCCAGCAGTTTCTGCTTCTAGTCAGCTGCCCAACAGCGATGCACTATTGCAGCA	nuclear factor of activated T cells 5
NFATC2	NM_012340.3	nuclear factor of activated T-cells, cytoplasmic, calcineurin-dependent 2,nuclear factor of activated T-cells 2	GACGGACATTGGAAGAAAGAACACGCGGGTGAGACTGGTTTTCCGAGTTCACATCCCAGAGTCCAGTGGCAGAATCGTCTCTTTACAGACTGCATCTAAC	nuclear factor of activated T cells 2
NFKB1	NM_003998.2	nuclear factor of kappa light polypeptide gene enhancer in B-cells 1	AGGGTATAGCTTCCCACACTATGGATTTCCTACTTATGGTGGGATTACTTTCCATCCTGGAACTACTAAATCTAATGCTGGGATGAAGCATGGAACCATG	nuclear factor kappa B subunit 1
NID2	NM_007361.3		GGCCTGTTTGGCTGGCTCTTTGCTTTAGAAAAACCTGGCTCTGAGAACGGCTTCAGCCTCGCAGGTGCTGCCTTTACCCATGACATGGAAGTTACATTCT	nidogen 2
NME1	NM_000269.2	non-metastatic cells 1, protein (NM23A) expressed in	CTTGTGGTTTCACCCTGAGGAACTGGTAGATTACACGAGCTGTGCTCAGAACTGGATCTATGAATGACAGGAGGGCAGACCACATTGCTTTTCACATCCA	NME/NM23 nucleoside diphosphate kinase 1
NME4	NM_005009.2	non-metastatic cells 4, protein expressed in	ACCTTTGTGGTGGGGGGGGGTCTTCACATTATCATAACCTCTCCTCTAAAGGGGAGGCATTAAAATTCACTGTGCCCAGCACATGGGTGGTACACTAATT	NME/NM23 nucleoside diphosphate kinase 4
NODAL	NM_018055.3	nodal, mouse, homolog,nodal homolog (mouse)	CTCACTTGCCATTGAGATTTTCCACCAGCCAAAGCCCGACACAGAGCAGGCTTCAGACAGCTGCTTAGAGCGGTTTCAGATGGACCTATTCACTGTCACT	nodal growth differentiation factor
NOS2	NM_153292.1	NOS2A;nitric oxide synthase 2A (inducible, hepatocytes),nitric oxide synthase 2, inducible	ACTTTCCAAGACACACTTCACCATAAGGCCAAAGGGATTTTAACTTGCAGGTCCAAATCTTGCCTGGGGTCCATTATGACTCCCAAAAGTTTGACCAGAG	nitric oxide synthase 2
NOS3	NM_000603.4	nitric oxide synthase 3 (endothelial cell)	CCGGACCACCTCGTCCCTGTGGAAAGACAAGGCAGCAGTGGAAATCAACGTGGCCGTGCTGCACAGTTACCAGCTAGCCAAAGTCACCATCGTGGACCAC	nitric oxide synthase 3
NOTCH1	NM_017617.3	TAN1;Notch (Drosophila) homolog 1 (translocation-associated),Notch homolog 1, translocation-associated (Drosophila)	CTGCCAGGCTTCACCGGCCAGAACTGTGAGGAAAATATCGACGATTGTCCAGGAAACAACTGCAAGAACGGGGGTGCCTGTGTGGACGGCGTGAACACCT	notch 1
NOX5	NM_024505.2	NADPH oxidase, EF-hand calcium binding domain 5	AGCTCCATAAGGTGGACTTTATCTGGATCAACAGAGACCAGCGGTCTTTCGAGTGGTTTGTGAGCCTGCTGACTAAACTGGAGATGGACCAGGCCGAGGA	NADPH oxidase 5
NPR1	NM_000906.2	ANPRA,NPRA;atrionatriuretic peptide receptor A,natriuretic peptide receptor A	TAATGGGGAAGCCCTGAAGATCCACTTGTCTTCTGAGACCAAGGCTGTCCTGGAGGAGTTTGGTGGTTTCGAGCTGGAGCTTCGAGGGGATGTAGAAATG	natriuretic peptide receptor 1
NR3C1	NM_001018077.1	GRL;nuclear receptor subfamily 3, group C, member 1,nuclear receptor subfamily 3, group C, member 1 (glucocorticoid receptor)	GCTTTCTCCTCTGGCGGGAGAAGACGATTCATTCCTTTTGGAAGGAAACTCGAATGAGGACTGCAAGCCTCTCATTTTACCGGACACTAAACCCAAAATT	nuclear receptor subfamily 3 group C member 1
NR4A1	NM_173157.1	HMR,GFRP1;nuclear receptor subfamily 4, group A, member 1	ACCGGCTGCAGTGTGCCCGTGGCTTCGGGGACTGGATTGACAGTATCCTGGCCTTCTCAAGGTCCCTGCACAGCTTGCTTGTCGATGTCCCTGCCTTCGC	nuclear receptor subfamily 4 group A member 1
NR4A3	NM_173198.1	nuclear receptor subfamily 4, group A, member 3	GTCGTCTGCCTTCCAAACCAAAGAGCCCATTACAACAGGAACCTTCTCAGCCCTCTCCACCTTCTCCTCCAATCTGCATGATGAATGCCCTTGTCCGAGC	nuclear receptor subfamily 4 group A member 3
NRCAM	NM_005010.4		CATTGTTGTCCGCCCATCCAGATCACCATTGTGGACCAAAGAAAAACTTGAACCAATCACACTTCAAAGTGGTCAGTCTTTAGTACTTCCCTGCAGACCC	neuronal cell adhesion molecule
NRP1	NM_003873.5		GCCTCGCTGCTTTCTTTTCTCCAAGACGGGCTGAGGATTGTACAGCTCTAGGCGGAGTTGGGGCTCTTCGGATCGCTTAGATTCTCCTCTTTGCTGCATT	neuropilin 1
NRP2	NM_003872.2		TCTCACCTGGGTTTTCTTAGCCCTCTACTTTTCAAGACACCAAGTGAGAGGCCAACCAGACCCACCGTGCGGAGGTCGTTTGAATTCCAAAGATGCTGGC	neuropilin 2
NRXN1	NM_138735.2		GGTGGACAAATCACGTATAAGTGGCCTCCTAATGACCGACCCAGTACACGAGCAGACAGACTGGCCATAGGTTTTAGCACTGTTCAGAAAGAAGCCGTAT	neurexin 1
NRXN3	NM_001105250.1	C14orf60;chromosome 14 open reading frame 60	ATGAAGGAGAAGCAGCAGAGCTCGAAGAGCGGCCACAAGAAACAGAAAAACAAGGACAGGGAGTATTACGTGTAAACATGCGAACACTGCTCACACGCGA	neurexin 3
NTRK1	NM_001012331.1	neurotrophic tyrosine kinase, receptor, type 1	GACGGAGAAACAAGTTTGGGATCAACCGCCCGGCTGTGCTGGCTCCAGAGGATGGGCTGGCCATGTCCCTGCATTTCATGACATTGGGTGGCAGCTCCCT	neurotrophic receptor tyrosine kinase 1
OAS1	NM_001032409.1	OIAS;2',5'-oligoadenylate synthetase 1 (40-46 kD),2'-5'-oligoadenylate synthetase 1, 40/46kDa	CTCCTGACGGTCTATGCTTGGGAGCGAGGGAGCATGAAAACACATTTCAACACAGCCCAGGGATTTCGGACGGTCTTGGAATTAGTCATAAACTACCAGC	2'-5'-oligoadenylate synthetase 1
OCLN	NM_002538.3		GTTGGAGACTATGATAGACAGAAAACATAGAAGGCTGATGCCAAGTTGTTTGAGAAATTAAGTATCTGACATCTCTGCAATCTTCTCAGAAGGCAAATGA	occludin
OGN	NM_014057.3	osteoglycin (osteoinductive factor)	TCTGCAAGGCTAATGACACCAGTTACATCCGGGACCGCATTGAAGAGATACGCCTGGAGGGCAATCCAATCGTCCTGGGAAAGCATCCAAACAGTTTTAT	osteoglycin
OLFML2B	NM_015441.1	olfactomedin-like 2B	TTGACCAGTAACCACCTTCCTTCAAGCCTTCAGCCCCTCCAGCTCCAAGTCTCAGATCTCGACCATTGAAAAGGTTTCTTCATCTGGGTCTTGCAGGAGG	olfactomedin like 2B
OVOL2	NM_021220.2	ZNF339,CHED1;zinc finger protein 339,ovo-like 2 (Drosophila),corneal endothelial dystrophy 1 (autosomal dominant)	AAAGACACCTGTGCACCTTCTGCGGCAAGGGCTTCAACGACACCTTCGACCTGAAGAGGCACGTCCGCACACACACAGGCATTCGTCCCTACAAATGCAA	ovo like zinc finger 2
P3H1	NM_001146289.1	LEPRE1;leucine proline-enriched proteoglycan (leprecan) 1	TATGACTACGATGGCTACAACTACCTTGAGTACAACGCTGACCTCTTCCAGGCCATCACAGATCATTACATCCAGGTCCTCAACTGTAAGCAGAACTGTG	prolyl 3-hydroxylase 1
P3H2	NM_018192.2	LEPREL1;leprecan-like 1	TAGGGTATAAGGCTGGTCTGTATGAAGCTATTGCAGATCACTACATGCAGGTGCTTGTTTGTCAGCATGAATGTGTGAGGGAACTTGCCACCCGCCCTGG	prolyl 3-hydroxylase 2
PCOLCE	NM_002593.3		TTGCCGTGACTGTCAGTCTTATTGGTGCTTATAAAACTGGAGGACTGGACCTGCCTTCTCCACCCACTGGTGCCTCCCTGAAGTTTTACGTGCCTTGCAA	procollagen C-endopeptidase enhancer
PDCD10	NM_145859.1	CCM3;cerebral cavernous malformations 3	TCATGTATCCTGTGTTTAATGAGCTAGAACGAGTAAATCTGTCTGCAGCCCAGACACTGAGAGCCGCTTTCATCAAGGCTGAAAAAGAAAATCCAGGTCT	programmed cell death 10
PDCL3	NM_024065.4		CGTGGCGGCGCTGTGCGCGTGCACAAAAGAGAGCTGAGGGGCGGGGGCGCTGCGGCACAGCTGGTTTGAGCAACTGAACTGGAAACAAGATGCAGGACCC	phosducin like 3
PDGFA	NM_002607.5	platelet-derived growth factor alpha polypeptide	TCCACCACCGCAGCGTCAAGGTGGCCAAGGTGGAATACGTCAGGAAGAAGCCAAAATTAAAAGAAGTCCAGGTGAGGTTAGAGGAGCATTTGGAGTGCGC	platelet derived growth factor subunit A
PDGFC	NM_016205.2		GCAACTTATGAAAGTAGACATTCAGATCCAGCCATTACTAACCTATTCCTTTTTTGGGGAAATCTGAGCCTAGCTCAGAAAAACATAAAGCACCTTGAAA	platelet derived growth factor C
PDGFRB	NM_002609.3	PDGFR;platelet-derived growth factor receptor, beta polypeptide	CGTGGGCTTCCTCCCTAATGATGCCGAGGAACTATTCATCTTTCTCACGGAAATAACTGAGATCACCATTCCATGCCGAGTAACAGACCCACAGCTGGTG	platelet derived growth factor receptor beta
PDK1	NM_002610.3	pyruvate dehydrogenase kinase, isoenzyme 1,pyruvate dehydrogenase kinase, isozyme 1	TTCTCAGGACACCATCCGTTCAATTGGTACAAAGCTGGTATATCCAGAGTCTTCAGGAGCTTCTTGATTTTAAGGACAAAAGTGCTGAGGATGCTAAAGC	pyruvate dehydrogenase kinase 1
PDPN	NM_006474.4		CTCCAGGAACCAGCGAAGACCGCTATAAGTCTGGCTTGACAACTCTGGTGGCAACAAGTGTCAACAGTGTAACAGGCATTCGCATCGAGGATCTGCCAAC	podoplanin
PEBP4	NM_144962.2		GGCCCTCTTGGACGAGGACACCCTCTTTTGCCAGGGCCTTGAAGTTTTCTACCCAGAGTTGGGGAACATTGGCTGCAAGGTTGTTCCTGATTGTAACAAC	phosphatidylethanolamine binding protein 4
PECAM1	NM_000442.3	platelet/endothelial cell adhesion molecule 1	ATCTGCACTGCAGGTATTGACAAAGTGGTCAAGAAAAGCAACACAGTCCAGATAGTCGTATGTGAAATGCTCTCCCAGCCCAGGATTTCTTATGATGCCC	platelet and endothelial cell adhesion molecule 1
PFKFB1	NM_002625.2	PFRX	GCATAATTGCAGAAAACATCAGGCAAGTGAAACTTGGCAGCCCTGATTATATAGACTGTGACCGGGAAAAGGTTCTGGAAGACTTTCTAAAGAGAATTGA	6-phosphofructo-2-kinase/fructose-2,6-biphosphatase 1
PFKFB4	NM_004567.2		TGATGCCACAAACACCACCCGAGAACGGAGAGCGACCATCTTTAATTTTGGAGAACAGAATGGCTACAAGACCTTTTTTGTCGAGTCCATCTGTGTGGAT	6-phosphofructo-2-kinase/fructose-2,6-biphosphatase 4
PGK1	NM_000291.2		GCAAGAAGTATGCTGAGGCTGTCACTCGGGCTAAGCAGATTGTGTGGAATGGTCCTGTGGGGGTATTTGAATGGGAAGCTTTTGCCCGGGGAACCAAAGC	phosphoglycerate kinase 1
PIK3CA	NM_006218.2	phosphoinositide-3-kinase, catalytic, alpha polypeptide,phosphatidylinositol-4,5-bisphosphate 3-kinase, catalytic subunit alpha	CCTCAGGCTTGAAGAGTGTCGAATTATGTCCTCTGCAAAAAGGCCACTGTGGTTGAATTGGGAGAACCCAGACATCATGTCAGAGTTACTGTTTCAGAAC	phosphatidylinositol-4,5-bisphosphate 3-kinase catalytic subunit alpha
PIK3CD	NM_005026.3	phosphoinositide-3-kinase, catalytic, delta polypeptide,phosphatidylinositol-4,5-bisphosphate 3-kinase, catalytic subunit delta	GAATCAACCGCGAGCGTGTCCCATTCATCCTCACCTACGACTTTGTCCATGTGATTCAGCAGGGGAAGACTAATAATAGTGAGAAATTTGAACGGTTCCG	phosphatidylinositol-4,5-bisphosphate 3-kinase catalytic subunit delta
PIK3CG	NM_002649.2	phosphoinositide-3-kinase, catalytic, gamma polypeptide,phosphatidylinositol-4,5-bisphosphate 3-kinase, catalytic subunit gamma	AAAACATACCAATTGTTGGCCAGAAGGGAAGTCTGGGATCAAAGTGCTTTGGATGTTGGGTTAACAATGCAGCTCCTGGACTGCAACTTCTCAGATGAAA	phosphatidylinositol-4,5-bisphosphate 3-kinase catalytic subunit gamma
PIK3R1	NM_181504.2	phosphoinositide-3-kinase, regulatory subunit 1 (alpha)	TCATGATGAGAAGACATGGAATGTTGGAAGCAGCAACCGAAACAAAGCTGAAAACCTGTTGCGAGGGAAGCGAGATGGCACTTTTCTTGTCCGGGAGAGC	phosphoinositide-3-kinase regulatory subunit 1
PIK3R2	NM_005027.2	phosphoinositide-3-kinase, regulatory subunit 2 (beta)	CCAGCCTGGGCACCCTGATTTTTAAGCCATAGACCTGGGGTCAGGGCAGGAAGGAACTTCACTCTGCTGCTTCCGAGAACCTCGGCCGTGACATTCGGGG	phosphoinositide-3-kinase regulatory subunit 2
PIK3R5	NM_001142633.1	phosphoinositide-3-kinase, regulatory subunit 5	TTTCTCTCAAGTTTCCTGAGTCTCCAGAAAAACAGCACTAACGCTGGACCTGTCTACTCTCAGAACCCGGCACAGATTCTCTCTTGATCTCCTTTTGGAA	phosphoinositide-3-kinase regulatory subunit 5
PIK3R6	NM_001010855.3	C17orf38;chromosome 17 open reading frame 38,phosphoinositide-3-kinase, regulatory subunit 6	CGGTGAGGAGCAGCTCTGGAAGGAACTGGTGCTCTTCCTCCGCCCAAGATCCCAGCTGCGCCTCAGTGCTGACTTGGAGGTCTTGGATCTGCAGGGCCTC	phosphoinositide-3-kinase regulatory subunit 6
PITX2	NM_000325.5	IRID2,IHG2,RIEG,RIEG1,RGS;paired-like homeodomain transcription factor 2,paired-like homeodomain 2	CCTGAATAACTTGAACAACCTGAGTAGCCCGTCGCTGAATTCCGCGGTGCCGACGCCTGCCTGTCCTTACGCGCCGCCGACTCCTCCGTATGTTTATAGG	paired like homeodomain 2
PKM	NM_182471.1	PKM2;pyruvate kinase, muscle	ATGGCAAGAGGGTGACAGCTTCCTTTCCTGTGTGTACTCTGTCCAGTTCCTTTAGAAAAAATGGATGCCCAGAGGACTCCCAACCCTGGCTTGGGGTCAA	pyruvate kinase M1/2
PKN1	NM_213560.1	PRKCL1;protein kinase C-like 1	ATCCACAGCGACGTGTTCTCTGAGCCCCGTGCCATCTTTTATTCCGCCTGCGTGGTGCTGGGCCTACAGTTTCTTCACGAACACAAGATCGTCTACAGGG	protein kinase N1
PKNOX1	NM_004571.3		AACTTTGTTGGACTCCTTAAAATAAGCACCCATGAAAGCCAGCCAGCCCTTCCTCCTTCCCTCACCACCCTCCGTCTCTTCGGCTGCTTGCTCTTTAGTG	PBX/knotted 1 homeobox 1
PLA2G10	NM_003561.1	phospholipase A2, group X	CAGAGCGTCCTGTGCGGACCGGCAGAGAACAAATGCCAAGAACTGTTGTGCAAGTGTGACCAGGAGATTGCTAACTGCTTAGCCCAAACTGAGTACAACT	phospholipase A2 group X
PLA2G2A	NM_000300.2	PLA2B,PLA2L;phospholipase A2, group IIA (platelets, synovial fluid)	TTCCCTGGAAACCTTCCACCCAGTGCTGAATTTCCCTCTCTCATACCCTCCCTCCCTACCCTAACCAAGTTCCTTGGCCATGCAGAAAGCATCCCTCACC	phospholipase A2 group IIA
PLA2G2D	NM_001271814.1	phospholipase A2, group IID	GGCTGGTGGTGATGGCTGGTGTGATTCCAATCCAGGGCGGGATCCTGAACCTGAACAAGATGGTCAAGCAAGTGACTGGGAAAATGCCCATCCTCTCCTA	phospholipase A2 group IID
PLA2G3	NM_015715.3	phospholipase A2, group III	CCCTGCGACACCTAGCTGAACTATGGTTTGGTGTCTGATCTTGAGAGGTTGATGTAACCTTTTAAAGGCCTCAGTTCGCTCACCTGTGAAATGGGTCTAA	phospholipase A2 group III
PLAU	NM_002658.2		TTCATTGATTACCCAAAGAAGGAGGACTACATCGTCTACCTGGGTCGCTCAAGGCTTAACTCCAACACGCAAGGGGAGATGAAGTTTGAGGTGGAAAACC	plasminogen activator, urokinase
PLAUR	NM_001005376.1		GAGAAGACCAACAGGACCCTGAGCTATCGGACTGGCTTGAAGATCACCAGCCTTACCGAGGTTGTGTGTGGGTTAGACTTGTGCAACCAGGGCAACTCTG	plasminogen activator, urokinase receptor
PLCG1	NM_002660.2	PLC1;phospholipase C, gamma 1 (formerly subtype 148),phospholipase C, gamma 1	GTGATGCTAGGGAACTCGGAGTTCGACAGCCTTGTTGACCTCATCAGCTACTATGAGAAACACCCGCTATACCGCAAGATGAAGCTGCGCTATCCCATCA	phospholipase C gamma 1
PLCG2	NM_002661.2	phospholipase C, gamma 2 (phosphatidylinositol-specific)	GCTTGAAAATCTTACACCAGGAAGCGATGAATGCGTCCACGCCCACCATTATCGAGAGTTGGCTGAGAAAGCAGATATATTCTGTGGATCAAACCAGAAG	phospholipase C gamma 2
PLEKHO1	NM_016274.4	pleckstrin homology domain containing, family O member 1	TCAAGAGGTATTTGACCTGAGTGACTATGAGAAGTGTGAAGAGCTCCGGAAGTCCAAGAGCAGGAGCAAGAAAAATCATAGCAAGTTTACTCTTGCCCAC	pleckstrin homology domain containing O1
PLS1	NM_002670.2	plastin 1 (I isoform)	AGTCCATTTCTGCTGCTAACAATTGAATCCAGAAATCTACTTTCTCCATCTTCCACTGTTAGTGCCAGTGAGCAATACTGTTGTGCAACAAAAATGTCAC	plastin 1
PLXDC1	NM_020405.4		GCATTGTCTTTGCCTATAAAGAGATCCCTATGTCTGTCCCGGAAATCAGCTCCTCCCAGCATCCTGTCAAAACCGGCCTATCGGATGCCTTCATGATTCT	plexin domain containing 1
PLXNC1	NM_005761.2		GTCGGAGAGCCCTTCTATTTGCTGGTGACGACTCTGAACCAGAAAATTAACAAGGGTCCCGTGGATGTAATCACTTGCAAAGCCCTGTACACACTTAATG	plexin C1
PLXND1	NM_015103.2		CAGCCTGGGGCTCCAGAGTCACGAGTACCGGGTCAAGATAGGCCAAGTAAGCTGCGACATCCAGATTGTCTCTGACAGAATCATCCACTGCTCGGTCAAC	plexin D1
PMP22	NM_000304.2		GTCTAGGCTGTTCTGTGCCTCCAAGGACTGTCTGGCAATGACTTGTATTGGCCACCAACTGTAGATGTATATATGGTGCCCTTCTGATGCTAAGACTCCA	peripheral myelin protein 22
PNPLA6	NM_006702.3	patatin-like phospholipase domain containing 6	CGGCGGTCTACAGACCTTAATGAGAGCCGCCGTGCAGACGTGCTTGCCTTCCCAAGCTCTGGCTTCACTGACTTGGCAGAGATTGTGTCCCGGATTGAGC	patatin like phospholipase domain containing 6
POPDC3	NM_022361.4		GGAAGGCATTTTTCAGGTAACCCTCACTGCAGAAACTGATTGTCGATATGTGTCTTGGAGGAGAAAGAAATTATATCTGCTCTTTGCTCAGCATCGCTAC	popeye domain containing 3
POSTN	NM_001135935.1	periostin, osteoblast specific factor	AGAGACGGTCACTTCACACTCTTTGCTCCCACCAATGAGGCTTTTGAGAAACTTCCACGAGGTGTCCTAGAAAGGATCATGGGAGACAAAGTGGCTTCCG	periostin
PPFIBP2	NM_003621.2	PTPRF interacting protein, binding protein 2 (liprin beta 2)	AGAGTTGACGGACGAATGCTGCAATACCTAACTGTGAACGATTTACTCTTCTTAAAAGTCACCAGCCAACTACATCATCTCAGCATCAAATGTGCCATTC	PPFIA binding protein 2
PPL	NM_002705.4		GGAAGTACAGAAGATCTGTGCCAATTCCCAGCAGTACCAGCAAGCTGTAAAGGACTATGAGTTAGAAGCAGAAAAACTAAGGTCTCTTCTCGACTTGGAG	periplakin
PPP1R16B	NM_015568.2	protein phosphatase 1, regulatory (inhibitor) subunit 16B,protein phosphatase 1, regulatory subunit 16B	AATGAAGCTAAGTGAGGAGCTTCCATTGGAATGCTTTTCCAGGGAGAGAGGCCAGTTAATTTAAAAAAAACAGTCGCTAGTTAACAGCGACAGAGCCCAG	protein phosphatase 1 regulatory subunit 16B
PPP2CB	NM_001009552.1	protein phosphatase 2 (formerly 2A), catalytic subunit, beta isoform,protein phosphatase 2, catalytic subunit, beta isozyme	GGACAAGACATTTCTGAAACCTTTAACCATGCCAATGGTCTCACACTGGTTTCTCGTGCCCACCAGCTTGTAATGGAGGGATACAATTGGTGTCATGATC	protein phosphatase 2 catalytic subunit beta
PPP2R1A	NM_014225.3	protein phosphatase 2 (formerly 2A), regulatory subunit A (PR 65), alpha isoform	AACTTAACTCCTTGTGCATGGCCTGGCTTGTGGATCATGTATATGCCATCCGCGAGGCAGCCACCAGCAACCTGAAGAAGCTAGTGGAAAAGTTTGGGAA	protein phosphatase 2 scaffold subunit Aalpha
PPP3R1	NM_000945.3	protein phosphatase 3 (formerly 2B), regulatory subunit B (19kD), alpha isoform (calcineurin B, type I),protein phosphatase 3 (formerly 2B), regulatory subunit B, 19kDa, alpha isoform (calcineurin B, type I),protein phosphatase 3 (formerly 2B), regulatory subunit B, alpha isoform,protein phosphatase 3, regulatory subunit B, alpha	GCCATCGCTGTTCCTTCAACTGAGTGCTGCACATCATGGGCTCTGTCTGTGAGAGAAAAATCCCGGTGCTTGGTGTCCTTGCATGACATGGAGTTTTGCA	protein phosphatase 3 regulatory subunit B, alpha
PRELP	NM_002725.3	proline arginine-rich end leucine-rich repeat protein	CCTGGCTACTAAACATCGACTTCGGTTCACTTCACGGATGTTCAGTGGATATCGGTCACATGCCAGGTCCCCAGCTACGCATTCAAGGATGGATAATATA	proline and arginine rich end leucine rich repeat protein
PRF1	NM_005041.3	perforin 1 (pore forming protein)	ACTGTTTTTCAGGGAGGTGGCTGGGTTTACACGCTAATCCCGATTCACCCTGTCCAAACTGCCTAAGCCCTCCGCCATTCTCAAGCCCTGCAGTCACAGC	perforin 1
PRKCB	NM_212535.1	PRKCB2,PKCB,PRKCB1;protein kinase C, beta 1,protein kinase C, beta	GCATTTGGAGTCCTGCTGTATGAAATGTTGGCTGGGCAGGCACCCTTTGAAGGGGAGGATGAAGATGAACTCTTCCAATCCATCATGGAACACAACGTAG	protein kinase C beta
PRKCG	NM_002739.3	PKCG,SCA14;protein kinase C, gamma	TCATCTGGGGTATCGGAAAGCAGGGCCTGCAATGTCAAGTCTGCAGCTTTGTGGTTCATCGACGATGCCACGAATTTGTGACCTTCGAGTGTCCAGGCGC	protein kinase C gamma
PRKCZ	NM_002744.4	protein kinase C, zeta	TTCCTTCCGAGGAGACAGATGGAATTGCTTACATTTCCTCATCCCGGAAGCATGACAGCATTAAAGACGACTCGGAGGACCTTAAGCCAGTTATCGATGG	protein kinase C zeta
PROK2	NM_021935.3		TTTTTTCTCACCACCCCAAGCCCCATTTGTGCCCTGCCACACAAATACACCTACAGCTTTTGGTCCCTTGCCTCTTCCACCTCAAAGAATTTCAAGGCTC	prokineticin 2
PROM1	NM_006017.1	PROML1,MCDR2,STGD4;prominin (mouse)-like 1,macular dystrophy, retinal 2,Stargardt disease 4 (autosomal dominant)	AGCCTGCGGTCATCTCTCAATGACCCTCTGTGCTTGGTGCATCCATCAAGTGAAACCTGCAACAGCATCAGATTGTCTCTAAGCCAGCTGAATAGCAACC	prominin 1
PRR15L	NM_024320.2	ATAD4;ATPase family, AAA domain containing 4,proline rich 15-like	CCCTGGCACTCTGTTAGGGTGCTGTAGAAGACTAGATTGATGGTAGTTTGGCCTGTTAGTTCCTGTTTTGGCCATGACTTTTGCAGATGGCAAGTCACAC	proline rich 15 like
PRSS22	NM_022119.3		TGCGTCTCGAGCGCTCCATACAGTTCTCAGAGCGGGTCCTGCCCATCTGCCTACCTGATGCCTCTATCCACCTCCCTCCAAACACCCACTGCTGGATCTC	protease, serine 22
PRSS8	NM_002773.3		ATCAGTCGTGAGACGTGTAACTGCCTGTACAACATCGACGCCAAGCCTGAGGAGCCGCACTTTGTCCAAGAGGACATGGTGTGTGCTGGCTATGTGGAGG	protease, serine 8
PTEN	NM_000314.4	BZS,MHAM	TCTTGACCAATGGCTAAGTGAAGATGACAATCATGTTGCAGCAATTCACTGTAAAGCTGGAAAGGGACGAACTGGTGTAATGATATGTGCATATTTATTA	phosphatase and tensin homolog
PTGDS	NM_000954.5	prostaglandin D2 synthase (21kD, brain),prostaglandin D2 synthase 21kDa (brain)	CAGGACAAGTTCCTGGGGCGCTGGTTCAGCGCGGGCCTCGCCTCCAACTCGAGCTGGCTCCGGGAGAAGAAGGCGGCGTTGTCCATGTGCAAGTCTGTGG	prostaglandin D2 synthase
PTGIS	NM_000961.3	prostaglandin I2 (prostacyclin) synthase	ACAATTTGTGTTCCTTGTGCTGGTGCACTTGGACTTGGAGCTGATCAACGCAGATGTGGAGATCCCTGAGTTTGACCTCAGCAGGTACGGCTTCGGTCTG	prostaglandin I2 synthase
PTGS2	NM_000963.1	prostaglandin-endoperoxide synthase 2 (prostaglandin G/H synthase and cyclooxygenase)	GCTACAAAAGCTGGGAAGCCTTCTCTAACCTCTCCTATTATACTAGAGCCCTTCCTCCTGTGCCTGATGATTGCCCGACTCCCTTGGGTGTCAAAGGTAA	prostaglandin-endoperoxide synthase 2
PTK2	NM_153831.2	PTK2 protein tyrosine kinase 2	ATCCTGTCTCCAGTCTACAGATTTGATAAGGAATGCTTCAAGTGTGCTCTTGGTTCAAGCTGGATTATTTCAGTGGAACTGGCAATCGGCCCAGAAGAAG	protein tyrosine kinase 2
PTK2B	NM_004103.3	FAK2;FAK2	CCAGTAGATGTGGAAAAGGAGGACGTGCGTATCCTCAAGGTCTGCTTCTATAGCAACAGCTTCAATCCTGGGAAAAACTTCAAACTGGTCAAATGCACTG	protein tyrosine kinase 2 beta
PTK6	NM_005975.2	PTK6 protein tyrosine kinase 6	CCCGGCTGAGGGTGGGAGGCAAACACGCCTTGTTCCTGCTCTTCCCAGTTCAGCTTGGTGGGAGAAAGTCATTCGCGTGGCTCGGGACGCTCATGTAAAT	protein tyrosine kinase 6
PTPRB	NM_002837.3	PTPB	CTTGTAAATACCGCAACCGAGTATCGATTTACTTCCCTAACACCAGGCCGCCAATACAAAATTCTTGTCTTGACGATTAGCGGGGATGTACAGCAGTCAG	protein tyrosine phosphatase, receptor type B
PTPRC	NM_080923.2	CD45	GACACGGCTGACTTCCAGATATGACCATGTATTTGTGGCTTAAACTCTTGGCATTTGGCTTTGCCTTTCTGGACACAGAAGTATTTGTGACAGGGCAAAG	protein tyrosine phosphatase, receptor type C
PTPRM	NM_002845.3	PTPRL1	CTCGGCAAATCACTATCCGCTGGGAGCCATTTGGATATAATGTAACTCGTTGCCACAGTTATAATCTCACTGTCCACTACTGTTACCAAGTTGGAGGACA	protein tyrosine phosphatase, receptor type M
PTRF	NM_012232.5	PTRF;polymerase I and transcript release factor	CGCACGGACGTGGCTCGAGTTTCCTCTGCTCTCCGCTCTCGCCCGCTAGCTCTCCTCCCTTCCGCTCCTGCTTCTCTCCGGGTCTCCCGCTCCAGCTCCA	caveolae associated protein 1		CAVIN1
PTTG1	NM_004219.2	TUTR1	TGTGAAGATGCCCTCTCCACCATGGGAATCCAATCTGTTGCAGTCTCCTTCAAGCATTCTGTCGACCCTGGATGTTGAATTGCCACCTGTTTGCTGTGAC	pituitary tumor-transforming 1
PTX3	NM_002852.3	TNFAIP5;pentaxin-related gene, rapidly induced by IL-1 beta,tumor necrosis factor, alpha-induced protein 5,pentraxin-related gene, rapidly induced by IL-1 beta,pentraxin 3, long	ATATCTGGGATAGTGTTCTTAGCAATGAAGAGATAAGAGAGACCGGAGGAGCAGAGTCTTGTCACATCCGGGGGAATATTGTTGGGTGGGGAGTCACAGA	pentraxin 3
PXDN	NM_012293.1	peroxidasin homolog (Drosophila)	GCGACTGTTGACAGAGCTATAAACTCAACCCGAACACATTTGTTTGACAGCCGTCCTCGTTCTCCAAATGATTTGCTGGCCTTGTTCCGGTATCCGAGGG	peroxidasin
PYCARD	NM_013258.3		ATGCGGAAGCTCTTCAGTTTCACACCAGCCTGGAACTGGACCTGCAAGGACTTGCTCCTCCAGGCCCTAAGGGAGTCCCAGTCCTACCTGGTGGAGGACC	PYD and CARD domain containing
QKI	NM_006775.2	quaking homolog, KH domain RNA binding (mouse)	TAATTTTGTTGGGAGAATCCTTGGACCTAGAGGACTTACAGCCAAACAACTTGAAGCAGAAACCGGATGTAAAATCATGGTCCGAGGCAAAGGCTCAATG	QKI, KH domain containing RNA binding
RAB25	NM_020387.2		AAGATTATAACTTTGTCTTCAAGGTGGTGCTGATCGGCGAATCAGGTGTGGGGAAGACCAATCTACTCTCCCGATTCACGCGCAATGAGTTCAGCCACGA	RAB25, member RAS oncogene family
RAC1	NM_198829.1	ras-related C3 botulinum toxin substrate 1 (rho family, small GTP binding protein Rac1)	AAAGACCTTCGTCTTTGAGAAGACGGTAGCTTCTGCAGTTAGGAGGTGCAGACACTTGCTCTCCTATGTAGTTCTCAGATGCGTAAAGCAGAACAGCCTC	Rac family small GTPase 1
RAC2	NM_002872.3	ras-related C3 botulinum toxin substrate 2 (rho family, small GTP binding protein Rac2)	GCTGCCACAACTTGTGTACCTTCAGGGATGGGGCTCTTACTCCCTCCTGAGGCCAGCTGCTCTAATATCGATGGTCCTGCTTGCCAGAGAGTTCCTCTAC	Rac family small GTPase 2
RAF1	NM_002880.3	v-raf-1 murine leukemia viral oncogene homolog 1	ATAGAAGCCAGTGAAGTGATGCTGTCCACTCGGATTGGGTCAGGCTCTTTTGGAACTGTTTATAAGGGTAAATGGCACGGAGATGTTGCAGTAAAGATCC	Raf-1 proto-oncogene, serine/threonine kinase
RAMP1	NM_005855.2		GACCACTGCCTGCCAGGAGGCTAACTACGGTGCCCTCCTCCGGGAGCTCTGCCTCACCCAGTTCCAGGTAGACATGGAGGCCGTCGGGGAGACGCTGTGG	receptor activity modifying protein 1
RAMP2	NM_005854.2		ATAAGGATCAAATGGATCCTATCGAAAAGGATTGGTGCGACTGGGCCATGATTAGCAGGCCTTATAGCACCCTGCGAGATTGCCTGGAGCACTTTGCAGA	receptor activity modifying protein 2
RB1	NM_000321.1	OSRC;osteosarcoma,retinoblastoma 1	CCTATCTCCGGCTAAATACACTTTGTGAACGCCTTCTGTCTGAGCACCCAGAATTAGAACATATCATCTGGACCCTTTTCCAGCACACCCTGCAGAATGA	RB transcriptional corepressor 1
RBL1	NM_183404.1	retinoblastoma-like 1	ACTGACAGCACAGGCTAATGTGGAGTATAACCTTCAACAGCACTTTGAAAAAAAAAGGTCATTTGCACCTTCTACCCCACTGACCGGACGGAGATATTTA	RB transcriptional corepressor like 1
RBL2	NM_005611.3	retinoblastoma-like 2	GAATCTCCACACCACTAACTGGTGTTAGGTACATTAAGGAGAATAGCCCTTGTGTGACTCCAGTTTCTACAGCTACGCATAGCTTGAGTCGTCTTCACAC	RB transcriptional corepressor like 2
RBM47	NM_019027.3		CAAGGAAGCTGCCTGAATTTGCCTGTATACTCTCGTTCTGCGACTTATAAAGGACCAGACAAATCAAATTAGTGGTTTTGGTTTCCGCCAGCTGTGGATG	RNA binding motif protein 47
RBPJ	NM_015874.3	IGKJRB1,RBPSUH;recombining binding protein suppressor of hairless (Drosophila)	ATCAGAAGGAGAAGAATTCACAGTCCGAGATGGCTACATCCATTATGGACAAACAGTCAAACTTGTGTGCTCAGTTACTGGCATGGCACTCCCAAGATTG	recombination signal binding protein for immunoglobulin kappa J region
RBX1	NM_014248.2		ATTATGGATCTTTGCATAGAATGTCAAGCTAACCAGGCGTCCGCTACTTCAGAAGAGTGTACTGTCGCATGGGGAGTCTGTAACCATGCTTTTCACTTCC	ring-box 1
RELN	NM_005045.2		GGCAACCCCACCTACTACGTTCCGGGACAAGAATACCATGTGACAATTTCAACAAGCACCTTTTTTGACGGCTTGCTGGTGACAGGACTATACACATCTA	reelin
RGCC	NM_014059.2	C13orf15;chromosome 13 open reading frame 15	TCCGAGGACCTGCTAAAATCAGCTACTAGAATCTGCTGCCAGAGGGGACAAAGACGTGCACTCAACCTTCTACCAGGCCACTCTCAGGCTCACCTTAAAA	regulator of cell cycle
RHOA	NM_001664.2	ARH12,ARHA;ras homolog gene family, member A	GGTACTCTGGTGAGTCACCACTTCAGGGCTTTACTCCGTAACAGATTTTGTTGGCATAGCTCTGGGGTGGGCAGTTTTTTGAAAATGGGCTCAACCAGAA	ras homolog family member A
RNH1	NM_203384.1	RNH;ribonuclease/angiogenin inhibitor	AAGTCCTGCAGCTTCACAGCCGCCTGCTGCTCCCACTTCAGCTCAGTGCTGGCCCAGAACAGGTTTCTCCTGGAGCTACAGATAAGCAACAACAGGCTGG	ribonuclease/angiogenin inhibitor 1
ROBO4	NM_019055.5	roundabout homolog 4 (Drosophila),roundabout, axon guidance receptor, homolog 4 (Drosophila)	CCTGACTCTCAGATCTCTTCCCAGAGAAGTCAGCTCCACTGTCGTATGCCCAAGGCTGGTGCTTCTCCTGTAGATTACTCCTGAACCGTGTCCCTGAGAC	roundabout guidance receptor 4
ROCK1	NM_005406.1		TCTTGCTACTCAGTTGGATCTAGCAGAAACAAAAGCTGAGTCTGAGCAGTTGGCGCGAGGCCTTCTGGAAGAACAGTATTTTGAATTGACGCAAGAAAGC	Rho associated coiled-coil containing protein kinase 1
ROCK2	NM_004850.3		CAGCAGAAGAAACAGGAATTACAGGATGAACGGGACTCTTTGGCTGCCCAACTGGAGATCACCTTGACCAAAGCAGATTCTGAGCAACTGGCTCGTTCAA	Rho associated coiled-coil containing protein kinase 2
RORA	NM_134261.2	RAR-related orphan receptor A	AAAATTAACCGAGACACTTTATATGGCCCTGCACAGACCTGGAGCGCCACACACTGCACATCTTTTGGTGATCGGGGTCAGGCAAAGGAGGGGAAACAAT	RAR related orphan receptor A
RORB	NM_006914.3	RAR-related orphan receptor B	CCTGGATGATGAGACCTTGGCAAAGTTAATAGCCAAGATACCAACCATCACGGCAGTTTGCAACTTGCACGGGGAGAAGCTGCAGGTATTTAAGCAATCT	RAR related orphan receptor B
RPS27A	NM_002954.5		GAATGGCAAAATTAGTCGCCTTCGTCGAGAGTGCCCTTCTGATGAATGTGGTGCTGGGGTGTTTATGGCAAGTCACTTTGACAGACATTATTGTGGCAAA	ribosomal protein S27a
RPS6KB1	NM_003161.2	STK14A;ribosomal protein S6 kinase, 70kD, polypeptide 1	GAGAAATTTGAAATCTCAGAAACTAGTGTGAACAGAGGGCCAGAAAAAATCAGACCAGAATGTTTTGAGCTACTTCGGGTACTTGGTAAAGGGGGCTATG	ribosomal protein S6 kinase B1
RPS6KB2	NM_003952.2	ribosomal protein S6 kinase, 70kD, polypeptide 2	TCAAAAAGTTTCTGAAACGGAATCCCAGCCAGCGGATTGGGGGTGGCCCAGGGGATGCTGCTGATGTGCAGAGACATCCCTTTTTCCGGCACATGAATTG	ribosomal protein S6 kinase B2
RRAS	NM_006270.3	related RAS viral (r-ras) oncogene homolog	CAGTACATGCGTGCTGGCCACGGCTTCCTGCTGGTGTTCGCCATTAACGACCGGCAGAGTTTCAACGAGGTGGGCAAGCTCTTCACGCAGATTCTGCGGG	RAS related
RTN4	NM_007008.2		TTAAGAAGACTGGAGTGGTGTTTGGTGCCAGCCTATTCCTGCTGCTTTCATTGACAGTATTCAGCATTGTGAGCGTAACAGCCTACATTGCCTTGGCCCT	reticulon 4
RUNX1	NM_001754.4	AML1,CBFA2;acute myeloid leukemia 1,runt-related transcription factor 1	CAGCCATGAAGAACCAGGTTGCAAGATTTAATGACCTCAGGTTTGTCGGTCGAAGTGGAAGAGGGAAAAGCTTCACTCTGACCATCACTGTCTTCACAAA	runt related transcription factor 1
RUNX1T1	NM_004349.2	AML1T1,CBFA2T1;core-binding factor, runt domain, alpha subunit 2; translocated to, 1; cyclin D-related,runt related transcription factor 1; translocated to, 1 (cyclin D related)	CTTTGACAGAGAGCCTTTGCACTCAGAACATCCAAGCAAGCGACCATGCACTATTAGCCCAGGCCAGCGGTACAGTCCAAATAACGGCTTATCCTACCAG	RUNX1 translocation partner 1
S100A14	NM_020672.1		CTGGAGATAAAACTTGTCTCCTCTACCACCACCCTGTACCCTAGCCTGCACCTGTCCTCATCTCTGCAAAGTTCAGCTTCCTTCCCCAGGTCTCTGTGCA	S100 calcium binding protein A14
S100A7	NM_002963.2	PSOR1;S100 calcium-binding protein A7 (psoriasin 1),S100 calcium binding protein A7 (psoriasin 1)	AGATGAGCAACACTCAAGCTGAGAGGTCCATAATAGGCATGATCGACATGTTTCACAAATACACCAGACGTGATGACAAGATTGACAAGCCAAGCCTGCT	S100 calcium binding protein A7	S100A7A (NM_176823)
S1PR1	NM_001400.4	EDG1;endothelial differentiation, sphingolipid G-protein-coupled receptor, 1	GCCTACACAGCTAACCTGCTCTTGTCTGGGGCCACCACCTACAAGCTCACTCCCGCCCAGTGGTTTCTGCGGGAAGGGAGTATGTTTGTGGCCCTGTCAG	sphingosine-1-phosphate receptor 1
SACS	NM_014363.4	spastic ataxia of Charlevoix-Saguenay (sacsin)	TTGAGTCTTTTAGGGCAGATGCAGACACAGTGCTGCTCTTTCTGAAAAGTGTGCAGGATGTTTCCTTATATGTCCGAGAGGCTGACGGAACAGAGAAACT	sacsin molecular chaperone
SAMSN1	NM_022136.3		ATTCAGGACCATTCTGTGGCCGTGCCAGAGTGCATACGGATTTCACGCCAAGTCCCTATGACACTGACTCCCTCAAAATCAAGAAAGGAGACATCATAGA	SAM domain, SH3 domain and nuclear localization signals 1
SCG2	NM_003469.3		GGACTGAGGCCCTACCAGACGGGCTCAGTGTTGAGGATATTTTAAATCTTTTAGGGATGGAGAGTGCAGCAAATCAGAAAACGTCGTATTTTCCCAATCC	secretogranin II
SCNN1A	NM_001038.4	SCNN1;sodium channel, nonvoltage-gated 1 alpha,sodium channel, non-voltage-gated 1 alpha,sodium channel, non-voltage-gated 1 alpha subunit,sodium channel, non voltage gated 1 alpha subunit	CTTGAGATATTTCCTCAGCCTGAAAGTTTCCCCAACCATCTGCCAGAGAACTCCTATGCATCCCTTAGAACCCTGCTCAGACACCATTACTTTTGTGAAC	sodium channel epithelial 1 alpha subunit
SDC4	NM_002999.2	syndecan 4 (amphiglycan, ryudocan)	ACTGTTCATTCCTTTGTGCAGAGTGTATATCTCTGCCTGGGCAAGAGTGTGGAGGTGCCGAGGTGTCTTCATTCTCTCGCACATTTCCACAGCACCTGCT	syndecan 4
SELE	NM_000450.2	ELAM1,ELAM;endothelial adhesion molecule 1	AATTCACCTACAAGTCCTCTTGTGCCTTCAGCTGTGAGGAGGGATTTGAATTACATGGATCAACTCAACTTGAGTGCACATCTCAGGGACAATGGACAGA	selectin E
SEMA3E	NM_012431.1	SEMAH;sema domain, immunoglobulin domain (Ig), short basic domain, secreted, (semaphorin) 3E	TGGACAACAGTTTGTTGGGGATGCTTTGGATAAGACTGAAGAACATCTGGCTTATGGCATAGAGAACAACAGTACTTTGCTGGAATGTACCCCACGATCT	semaphorin 3E
SERINC5	NM_001174071.1	C5orf12;chromosome 5 open reading frame 12	GGCTTGGTTTTGATGGCAGTGTTTTATACACAGAAAGACAGCTGCATGGAAAACAAAATTCTGCTGGGAGTAAATGGAGGCCTGTGCCTGCTTATATCAT	serine incorporator 5
SERPINA1	NM_000295.4	PI;serine (or cysteine) proteinase inhibitor, clade A (alpha-1 antiproteinase, antitrypsin), member 1,serpin peptidase inhibitor, clade A (alpha-1 antiproteinase, antitrypsin), member 1	TCACTGTCAACTTCGGGGACACCGAAGAGGCCAAGAAACAGATCAACGATTACGTGGAGAAGGGTACTCAAGGGAAAATTGTGGATTTGGTCAAGGAGCT	serpin family A member 1
SERPINE1	NM_001165413.1	PLANH1,PAI1;serine (or cysteine) proteinase inhibitor, clade E (nexin, plasminogen activator inhibitor type 1), member 1,serpin peptidase inhibitor, clade E (nexin, plasminogen activator inhibitor type 1), member 1	GATGGAACTACGGGGCTTACAGGAGCTTTTGTGTGCCTGGTAGAAACTATTTCTGTTCCAGTCACATTGCCATCACTCTTGTACTGCCTGCCACCGCGGA	serpin family E member 1
SERPINF1	NM_002615.4	PEDF;serine (or cysteine) proteinase inhibitor, clade F (alpha-2 antiplasmin, pigment epithelium derived factor), member 1,serpin peptidase inhibitor, clade F (alpha-2 antiplasmin, pigment epithelium derived factor), member 1,sserpin family F member 1	GTCGGACCCTAAGGCTGTTTTACGCTATGGCTTGGATTCAGATCTCAGCTGCAAGATTGCCCAGCTGCCCTTGACCGGAAGCATGAGTATCATCTTCTTC	serpin family F member 1
SERPING1	NM_000062.2	C1NH;serine (or cysteine) proteinase inhibitor, clade G (C1 inhibitor), member 1, (angioedema, hereditary),serpin peptidase inhibitor, clade G (C1 inhibitor), member 1	GACAGAGGCGAAGGGAAGGTCGCAACAACAGTTATCTCCAAGATGCTATTCGTTGAACCCATCCTGGAGGTTTCCAGCTTGCCGACAACCAACTCAACAA	serpin family G member 1
SERPINH1	NM_001235.2	CBP1,CBP2,SERPINH2;serine (or cysteine) proteinase inhibitor, clade H (heat shock protein 47), member 2,serine (or cysteine) proteinase inhibitor, clade H (heat shock protein 47), member 1, (collagen binding protein 1),serpin peptidase inhibitor, clade H (heat shock protein 47), member 1, (collagen binding protein 1)	ATGGTGGACAACCGTGGCTTCATGGTGACTCGGTCCTATACCGTGGGTGTCATGATGATGCACCGGACAGGCCTCTACAACTACTACGACGACGAGAAGG	serpin family H member 1
SET	NM_001122821.1	SET translocation (myeloid leukemia-associated)	GTTGCTGGCATGTCTTCATTGGCTATATAAAATGTGGCCAAGAAGATAGGCTCTCAGTAAGAAGTCTGATGGTGAGCAGTAACTGTCCCTGCTTTCTGGT	SET nuclear proto-oncogene
SETD2	NM_014159.6		GCTATTCTCGGCCATACACAGATAACAGAGCACGAGAGAGTTCTGACTCAGAAGAAGAGTATAAGAAGACATACTCAAGGCGTACCTCATCTCATTCCTC	SET domain containing 2
SFRP1	NM_003012.3		CAGAGTCCTTAGTGGAGGGGTTTACCTGGAACATTAGTAGTTACCACAGAATACGGAAGAGCAGGTGACTGTGCTGTGCAGCTCTCTAAATGGGAATTCT	secreted frizzled related protein 1
SFRP2	NM_003013.2		GAAGGAGATAACCTACATCAACCGAGATACCAAAATCATCCTGGAGACCAAGAGCAAGACCATTTACAAGCTGAACGGTGTGTCCGAAAGGGACCTGAAG	secreted frizzled related protein 2
SH2B3	NM_005475.2		CCTCCAGCCAGAAGTTAAACATCTGGGATATGACGTCTTCATGCCAGGGGCACTCATTTCTTAGCAGCCTCTCTACATACATCTCTCAGGTGGTGCCAAG	SH2B adaptor protein 3
SH2D3A	NM_005490.2	SH2 domain-containing 3A	ACCCACAGCCCTCTTTCAACTGGAGGATGAGCAATTCCCCAGCATACCGGCTCTGGTTCACAGTTATATGACAGGCAGGCGCCCACTGTCCCAGGCCACA	SH2 domain containing 3A
SH3YL1	NM_001159597.1	SH3 domain containing, Ysc84-like 1 (S. cerevisiae)	AAAGGCCTTGCAATTCTGTCTGTGATCAAAGCCGGGTTCCTGGTGACTGCCAGAGGAGGCAGCGGGATTGTAGTGGCGCGCCTTCCAGATGGAAAATGGT	SH3 and SYLF domain containing 1
SHB	NM_003028.2	SHB adaptor protein (a Src homology 2 protein),SHB (Src homology 2 domain containing) adaptor protein B,Src homology 2 domain containing adaptor protein B	TGTAGGGAAAGGGAGACAGAGAAGGAACGTCATTTGCCCAAAGCCACACAGCTCACCAGCAGCAGAGCGGTTCTGCAGCCAATGCTCTTTCGTTGGTTCT	SH2 domain containing adaptor protein B
SIRT1	NM_012238.4	sirtuin (silent mating type information regulation 2, S. cerevisiae, homolog) 1,sirtuin (silent mating type information regulation 2 homolog) 1 (S. cerevisiae)	CCACGAACACAAAAAGAATTGGCTTATTTGTCAGAGTTGCCACCCACACCTCTTCATGTTTCAGAAGACTCAAGTTCACCAGAAAGAACTTCACCACCAG	sirtuin 1
SKP1	NM_170679.2	SKP1A;S-phase kinase-associated protein 1A (p19A)	CCCAGGTACGCAAAGAGAACCAGTGGTGTGAAGAGAAGTGAAATGTTGTGCCTGACACTGTAACACTGTAAGGATTGTTCCAAATACTAGTTGCACTGCT	S-phase kinase associated protein 1
SLC12A6	NM_001042494.1	KCC3,ACCPN;agenesis of corpus callosum and peripheral neuropathy (Andermann syndrome),solute carrier family 12 (potassium/chloride transporter), member 6	AGAGCTCCCATCTGATCTGCAGTCATTACAGAAAAAGCAAATATTCCCTCAACATCAGAACAATGCTCAAGTCTTTCAAGCCACGTCTGAGCAGTCAAAG	solute carrier family 12 member 6
SLC2A1	NM_006516.2	GLUT1,GLUT,HTLVR,CSE;human T-cell leukemia virus (I and II) receptor,choreoathetosis/spasticity, episodic (paroxysmal choreoathetosis/spasticity),solute carrier family 2 (facilitated glucose transporter), member 1	AGGCTCCATTAGGATTTGCCCCTTCCCATCTCTTCCTACCCAACCACTCAAATTAATCTTTCTTTACCTGAGACCAGTTGGGAGCACTGGAGTGCAGGGA	solute carrier family 2 member 1
SLC35A3	NM_012243.1	solute carrier family 35 (UDP-N-acetylglucosamine (UDP-GlcNAc) transporter), member 3,solute carrier family 35 (UDP-N-acetylglucosamine (UDP-GlcNAc) transporter), member A3	GGTGTATACCAGTGGCTGTCCCTAGTAATTTTGATGACAGGAGTTGCTTTTGTACAGTGGCCCTCAGATTCTCAGCTTGATTCTAAGGAACTTTCAGCTG	solute carrier family 35 member A3
SLC37A1	NM_018964.3	solute carrier family 37 (glycerol-3-phosphate transporter), member 1,solute carrier family 37 (glucose-6-phosphate transporter), member 1	GATGCTCGCCAGCGGAGCCTTCACCGCCCTGTTCGGCTTAGGGTATTTCTACAACATCCACAGTTTCGGATTCTACGTGGTAACTCAGGTCATCAACGGG	solute carrier family 37 member 1
SLC44A4	NM_032794.1	C6orf29;chromosome 6 open reading frame 29,solute carrier family 44, member 4	CACAGACCTGCTGCTGTTCTTTGGGAAGCTGCTGGTGGTCGGAGGCGTGGGGGTCCTGTCCTTCTTTTTTTTCTCCGGTCGCATCCCGGGGCTGGGTAAA	solute carrier family 44 member 4
SLIT2	NM_004787.1	SLIL3;slit (Drosophila) homolog 2,slit homolog 2 (Drosophila)	AAGGGTTTGAAGGTCTTGCCGAAAGGTATTCCAAGAGATGTCACAGAGTTGTATCTGGATGGAAACCAATTTACACTGGTTCCCAAGGAACTCTCCAACT	slit guidance ligand 2
SLPI	NM_003064.2	secretory leukocyte protease inhibitor (antileukoproteinase)	TTTCTGTGAGATGGATGGCCAGTGCAAGCGTGACTTGAAGTGTTGCATGGGCATGTGTGGGAAATCCTGCGTTTCCCCTGTGAAAGCTTGATTCCTGCCA	secretory leukocyte peptidase inhibitor
SMAD1	NM_005900.2	MADH1;MAD, mothers against decapentaplegic homolog 1 (Drosophila),SMAD, mothers against DPP homolog 1 (Drosophila)	CCTTGCATGTACTTGAAGGATGGATGAGTCAGACACGATTGAGAACTGACAAAGGAGCCTTGATAATACTTGACCTCTGTGACCAACTGTTGGATTCAGA	SMAD family member 1
SMAD2	NM_005901.5	MADH2;MAD, mothers against decapentaplegic homolog 2 (Drosophila),SMAD, mothers against DPP homolog 2 (Drosophila)	TGCTCAAGCATGTCATAAAGCTTCACCAATCAAGTCCCATGAAAAGACTTAATGTAACAACTCTTCTGTCATAGCATTGTGTGTGGTCCCTATGGACTGT	SMAD family member 2
SMAD3	NM_005902.3	MADH3;MAD, mothers against decapentaplegic homolog 3 (Drosophila),SMAD, mothers against DPP homolog 3 (Drosophila)	TTAAAGGACAGTTGAAAAGGGCAAGAGGAAACCAGGGCAGTTCTAGAGGAGTGCTGGTGACTGGATAGCAGTTTTAAGTGGCGTTCACCTAGTCAACACG	SMAD family member 3
SMAD4	NM_005359.3	MADH4;MAD, mothers against decapentaplegic homolog 4 (Drosophila),SMAD, mothers against DPP homolog 4 (Drosophila)	AGGTTGCACATAGGCAAAGGTGTGCAGTTGGAATGTAAAGGTGAAGGTGATGTTTGGGTCAGGTGCCTTAGTGACCACGCGGTCTTTGTACAGAGTTACT	SMAD family member 4
SMAD5	NM_005903.5	MADH5;MAD, mothers against decapentaplegic homolog 5 (Drosophila),SMAD, mothers against DPP homolog 5 (Drosophila)	CCTGATGATCAGATGGGTCAAGATAATTCCCAGCCTATGGATACAAGCAATAATATGATTCCTCAGATTATGCCCAGTATATCCAGCAGGGATGTTCAGC	SMAD family member 5
SMAD9	NM_001127217.2	MADH6,MADH9;MAD, mothers against decapentaplegic homolog 9 (Drosophila),SMAD, mothers against DPP homolog 9 (Drosophila)	CCAGCACTGGTGCTCGGTCGCCTACTATGAACTGAACAACCGAGTTGGGGAGACATTCCAGGCTTCCTCCCGAAGTGTGCTCATAGATGGGTTCACCGAC	SMAD family member 9
SMC3	NM_005445.3	CSPG6;chondroitin sulfate proteoglycan 6 (bamacan)	TGTGACCCGGCTCCATTTTACTTGTTTGATGAAATTGACCAGGCTCTGGATGCTCAGCACAGAAAGGCTGTGTCAGATATGATTATGGAACTTGCTGTAC	structural maintenance of chromosomes 3
SMOC1	NM_001034852.1		GTGGGCACTCTGGACACATAGTCCAGCTTTCTAAAATCCAGGACTCTATCCTGGGCCTACTAAACTTCTGTTTGGAGACTGACCCTTGTGTATAAAGACG	SPARC related modular calcium binding 1
SMURF1	NM_181349.1		AAGAGAATCTGCCACCAGATCGAATTTCGACCCCTGAGCTTGTTCGGACGTATGGTCCAAATTCAGATTAAGGTGGTCACCCAACCCGAGATGTCAGGAA	SMAD specific E3 ubiquitin protein ligase 1
SMURF2	NM_022739.3		GAAGAAACATGTGGATTTGCTGTGGAATGACAAGCTTCAAGGATTTACCCAGGACTCTATTTATACAACCCTGACTGACAGCCTCCTTTCAGCAGAGTTT	SMAD specific E3 ubiquitin protein ligase 2
SNAI1	NM_005985.2	snail 1 (drosophila homolog), zinc finger protein,snail homolog 1 (Drosophila),snail family zinc finger 1	GACCACTATGCCGCGCTCTTTCCTCGTCAGGAAGCCCTCCGACCCCAATCGGAAGCCTAACTACAGCGAGCTGCAGGACTCTAATCCAGAGTTTACCTTC	snail family transcriptional repressor 1
SNAI2	NM_003068.3	SLUG;slug homolog, zinc finger protein (chicken),snail homolog 2 (Drosophila),snail family zinc finger 2	GCGTTTTCCAGACCCTGGTTGCTTCAAGGACACATTAGAACTCACACGGGGGAGAAGCCTTTTTCTTGCCCTCACTGCAACAGAGCATTTGCAGACAGGT	snail family transcriptional repressor 2
SNAI3	NM_178310.1	ZNF293;zinc finger protein 293,snail homolog 3 (Drosophila),snail family zinc finger 3	CCTTCGGGCCCATCTGCAAACGCACTCAGACGCCAAGAAGTACCGGTGCCGGCGCTGCACCAAGACCTTCTCCCGCATGTCCCTCCTGGCGCGGCATGAG	snail family transcriptional repressor 3
SNRPF	NM_003095.2		AGTACAAGGGCTATCTGGTATCTGTAGATGGCTACATGAACATGCAGCTTGCAAATACAGAAGAATACATAGATGGAGCTTTGTCTGGACATCTGGGTGA	small nuclear ribonucleoprotein polypeptide F
SOD1	NM_000454.4	ALS,ALS1;amyotrophic lateral sclerosis 1 (adult),superoxide dismutase 1, soluble	GCCTATAAAGTAGTCGCGGAGACGGGGTGCTGGTTTGCGTCGTAGTCTCCTGCAGCGTCTGGGGTTTCCGTTGCAGTCCTCGGAACCAGGACCTCGGCGT	superoxide dismutase 1
SORD	NM_003104.4		GAAGTCCTTAAGCAGAGGAATTGGTGTGCCTTAAAGATACAATCTGGGATAGTTTGGGGGAACTTGTAGCCAGAATGCCCTGTTCATGCTGAGCAAAGTT	sorbitol dehydrogenase
SOX17	NM_022454.3	SRY (sex determining region Y)-box 17,SRY box 17	AGCCACGGGGCCATTTCCTCGGTGGTGTCCGACGCCAGCTCCGCGGTATATTACTGCAACTATCCTGACGTGTGACAGGTCCCTGATCCGCCCCAGCCTG	SRY-box 17
SOX2	NM_003106.2	SRY (sex determining region Y)-box 2,SRY box 2	CTTAAGCCTTTCCAAAAAATAATAATAACAATCATCGGCGGCGGCAGGATCGGCCAGAGGAGGAGGGAAGCGCTTTTTTTGATCCTGATTCCAGTTTGCC	SRY-box 2
SOX9	NM_000346.2	CMD1,CMPD1;campomelic dysplasia, autosomal sex-reversal,SRY (sex determining region Y)-box 9,SRY box 9	CAGTGGCCAGGCCAACCTTGGCTAAATGGAGCAGCGAAATCAACGAGAAACTGGACTTTTTAAACCCTCTTCAGAGCAAGCGTGGAGGATGATGGAGAAT	SRY-box 9
SP1	NM_003109.1		AGCCCTGGTGCTACTTGCTTGAAGTTTTCAGTGTAAGTACCCTGATGCCTTTTGGACCTTGGGATCAGATCAAGAGTTTTGGAGATCAGGTACCAAGGAA	Sp1 transcription factor
SPARC	NM_003118.2	ON;osteonectin	TTTTCGAGACCTGTGACCTGGACAATGACAAGTACATCGCCCTGGATGAGTGGGCCGGCTGCTTCGGCATCAAGCAGAAGGATATCGACAAGGATCTTGT	secreted protein acidic and cysteine rich
SPARCL1	NM_004684.4	SPARC-like 1 (mast9, hevin)	TTGACCAACACCCTATGGATAGAGTCTTGACACATTCTGAACTTGCTCCTCTGCGAGCATCTCTGGTGCCCATGGAACACTGCATAACCCGTTTCTTTGA	SPARC like 1
SPDEF	NM_012391.1	SAM pointed domain containing ets transcription factor	CTCCATCCGCCAGTATTACAAGAAGGGCATCATCCGGAAGCCAGACATCTCCCAGCGCCTCGTCTACCAGTTCGTGCACCCCATCTGAGTGCCTGGCCCA	SAM pointed domain containing ETS transcription factor
SPHK2	NM_020126.3		CCGTCTCAGGATTGCGCTCGCTTTCATGGGACCAGACGTGATGCTGGAAGGTGGGCGTCGTCACGGTTAAAGAGAAATGGGCTCGTCCCGAGGGTAGTGC	sphingosine kinase 2
SPINK5	NM_006846.3	serine protease inhibitor, Kazal type 5	GAGCAATGACAAAGAGGATCTGTGTCGTGAATTTCGAAGCATGCAGAGAAATGGAAAGCTTATCTGCACCAGAGAAAATAACCCTGTTCGAGGCCCATAT	serine peptidase inhibitor, Kazal type 5
SPINT1	NM_001032367.1	serine protease inhibitor, Kunitz type 1	CTTTACCTATGGTGGTTGTTACGGCAACAAGAACAACTTTGAGGAAGAGCAGCAGTGCCTCGAGTCTTGTCGCGGCATCTCCAAGAAGGATGTGTTTGGC	serine peptidase inhibitor, Kunitz type 1
SPOCK3	NM_001204355.1	sparc/osteonectin, cwcv and kazal-like domains proteoglycan (testican) 3	GGCTGGATGTTTAACAGACTTGATACAAACTATGACCTGCTATTGGACCAGTCAGAGCTCAGAAGCATTTACCTTGATAAGAATGAACAGTGTACCAAGG	SPARC/osteonectin, cwcv and kazal like domains proteoglycan 3
SPP1	NM_000582.2	BNSP,OPN;osteopontin,bone sialoprotein I	CGCCTTCTGATTGGGACAGCCGTGGGAAGGACAGTTATGAAACGAGTCAGCTGGATGACCAGAGTGCTGAAACCCACAGCCACAAGCAGTCCAGATTATA	secreted phosphoprotein 1
SRC	NM_005417.3	SRC1;v-src avian sarcoma (Schmidt-Ruppin A-2) viral oncogene homolog	GGCATGAGAAGCTGGTGCAGTTGTATGCTGTGGTTTCAGAGGAGCCCATTTACATCGTCACGGAGTACATGAGCAAGGGGAGTTTGCTGGACTTTCTCAA	SRC proto-oncogene, non-receptor tyrosine kinase
SRF	NM_003131.2		GGAGGACATGCGTGTGTCAGGGATGAGTTGAGGTGATATTTTTATGTGCAGCGACCCTTGGTGTTTCCCTTCCTCGGTGGCTCTGGGGTATGTGTGTGTG	serum response factor
SRGN	NR_036430.1	PRG,PRG1;proteoglycan 1, secretory granule	GAGAGCTAGACTAAGTTGGTCATGATGCAGAAGCTACTCAAATGCAGTCGGCTTGTCCTGGCTCTTGCCCTCATCCTGGTTCTGGAATCCTCAGTTCAAG	serglycin
SRPK2	NM_182692.1	SFRS protein kinase 2	GGAGACCTCTTCAATGGCCGGTATCATGTTATTAGAAAGCTTGGATGGGGGCACTTCTCTACTGTCTGGCTGTGCTGGGATATGCAGGGGAAAAGATTTG	SRSF protein kinase 2
SRPX2	NM_014467.2	sushi-repeat-containing protein, X-linked 2	GTTCACCACCAATCTGTGCTCCTATGAAGATTAACGTCAACGTCAACTCAGCTGCTGGTCTCTTGGATCAATTCTATGAGAAACAGCGACTCCTCATCAT	sushi repeat containing protein, X-linked 2
SSTR2	NM_001050.2		AGGTGAAGTCCTCTGGAATCCGAGTGGGCTCCTCTAAGAGGAAGAAGTCTGAGAAGAAGGTCACCCGAATGGTGTCCATCGTGGTGGCTGTCTTCATCTT	somatostatin receptor 2
ST14	NM_021978.3	PRSS14;suppression of tumorigenicity 14 (colon carcinoma)	AACGGGGAGAAATACTGCGGAGAGAGGTCCCAGTTCGTCGTCACCAGCAACAGCAACAAGATCACAGTTCGCTTCCACTCAGATCAGTCCTACACCGACA	suppression of tumorigenicity 14
STAB1	NM_015136.2		CTCCCACTCTGCCTCCTGGCCTTCTGCCTGGCAGGCTTCAGCTTCGTCAGGGGGCAGGTGCTGTTCAAAGGCTGTGATGTGAAAACCACGTTTGTCACTC	stabilin 1
STAB2	NM_017564.9		GAGTGCAAGAAAGGATTTCGAGGAAATGGGATTGACTGTGAACCAATAACTTCATGCTTGGAACAAACCGGGAAATGTCATCCATTGGCAAGCTGTCAAT	stabilin 2
STAT1	NM_139266.1	signal transducer and activator of transcription 1, 91kD,signal transducer and activator of transcription 1, 91kDa	ACAGTGGTTAGAAAAGCAAGACTGGGAGCACGCTGCCAATGATGTTTCATTTGCCACCATCCGTTTTCATGACCTCCTGTCACAGCTGGATGATCAATAT	signal transducer and activator of transcription 1
STAT3	NM_139276.2	signal transducer and activator of transcription 3 (acute-phase response factor)	AGACTTGGGCTTACCATTGGGTTTAAATCATAGGGACCTAGGGCGAGGGTTCAGGGCTTCTCTGGAGCAGATATTGTCAAGTTCATGGCCTTAGGTAGCA	signal transducer and activator of transcription 3
SULF1	NM_001128204.1		TAGAACGAGGCATTTTGAATCAGCTACACGTACAACTAATGGAGCTCAGAAGCTGTCAAGGATATAAGCAGTGCAACCCAAGACCTAAGAATCTTGATGT	sulfatase 1
SV2B	NM_001167580.1		CCACTTCAGCTGTCAATATGTTTGTAACTCAGGTGACTGATTTGGGGGTGCCCTGAGCCACCCTTAGAATCACAGAGCTGCGTGTTTAACTTCAAGTCTT	synaptic vesicle glycoprotein 2B
SYK	NM_003177.3	spleen tyrosine kinase	CGGACTCTCCAAAGCACTGCGTGCTGATGAAAACTACTACAAGGCCCAGACCCATGGAAAGTGGCCTGTCAAGTGGTACGCTCCGGAATGCATCAACTAC	spleen associated tyrosine kinase
SYNE1	NM_015293.1	C6orf98;chromosome 6 open reading frame 98,spectrin repeat containing, nuclear envelope 1	GCTGCTTTTCCCAGCTCTTCTGGGGTGATCTATACAGTTGCCAAGGAAGAACTAAAGAAATTTGAGGCTTTCCAGCGACAGGTCCACGAGTGCCTGACGC	spectrin repeat containing nuclear envelope protein 1
TACSTD2	NM_002353.2	M1S1	CACTGGGAAAGAAGCCTGTTTCAGCTGCCTGAACGCAGTTTGGATGTCTTTGAGGACAGACATTGCCCGGAAACTCAGTCTATTTATTCTTCAGCTTGCC	tumor associated calcium signal transducer 2
TAL1	NM_003189.2	TCL5;T-cell acute lymphocytic leukemia 1	ACAGCATCTGTAGTCAGCCGACAACTATTTCGGCCTTTTGGGGGTGGGTCTGGCCGTACTTGTGATTTCGATGGTACGTGACCCTCTGCTGAAGACTTGC	TAL bHLH transcription factor 1, erythroid differentiation factor
TBX1	NM_080646.1	VCF;velocardiofacial syndrome	CGGATGTTTCCCACCTTCCAAGTGAAGCTCTTCGGCATGGATCCCATGGCCGACTATATGCTGCTCATGGACTTCGTGCCGGTGGACGATAAGCGCTACC	T-box 1
TBX4	NM_018488.2		CCCTCGCCACATCTAAATGCTGCCAATGAGTTTCTCTACTCTCAAACCTTCTCCTTGTCCCGAGAATCTTCCTTACAGTACCATTCAGGAATGGGGACTG	T-box 4
TBXA2R	NM_001060.3		CACACGCGCTCCTCCTTCCTCACCTTCCTCTGCGGCCTCGTCCTCACCGACTTCCTGGGGCTGCTGGTGACCGGTACCATCGTGGTGTCCCAGCACGCCG	thromboxane A2 receptor
TCEB1	NM_001204857.1	TCEB1;transcription elongation factor B (SIII), polypeptide 1 (15kD, elongin C),transcription elongation factor B (SIII), polypeptide 1 (15kDa, elongin C),transcription elongation factor B subunit 1	AAGGTTCGCTACACTAACAGCTCCACCGAGATTCCTGAATTCCCAATTGCACCTGAAATTGCACTGGAACTGCTGATGGCTGCGAACTTCTTAGATTGTT	elongin C		ELOC
TCEB2	NM_007108.2	TCEB2;transcription elongation factor B (SIII), polypeptide 2 (18kDa, elongin B),transcription elongation factor B subunit 2	CTGCATGTCCACTCCCAGACGATGGCCAAGAGCAGAAACACAAGCTGGAGCCAGTGTCCTGGTTTGACAGCATGTTCAACGAGGGAACCCCAAGACGGAC	elongin B		ELOB
TCF20	NM_005650.1	transcription factor 20 (AR1)	CAATGTGAATGCTGGATCTCAGTATGAAGGACACAATGTGGGTTCTAATGCACAGGCTTATGGAACACAATCCAATTACAGCTATCAGCCTCAATCTATG	transcription factor 20
TCF3	NM_003200.3		ACGTTTGGTGGCCTGCACCAGCACGAGCGTATGGGCTACCAGCTGCATGGAGCAGAGGTGAACGGTGGGCTCCCATCTGCATCCTCCTTCTCCTCAGCCC	transcription factor 3
TCF4	NM_003199.1		TGGAATCATTGGACCTTCTCATAATGGAGCCATGGGTGGTCTGGGCTCAGGGTATGGAACCGGCCTTCTTTCAGCCAACAGACATTCACTCATGGTGGGG	transcription factor 4
TDGF1	NM_003212.2		AAGGAAAGAAAACATCTTTAAGGGGAGGAACCAGAGTGCTGAAGGAATGGAAGTCCATCTGCGTGTGTGCAGGGAGACTGGGTAGGAAAGAGGAAGCAAA	teratocarcinoma-derived growth factor 1
TEK	NM_000459.3	VMCM;venous malformations, multiple cutaneous and mucosal,TEK tyrosine kinase, endothelial	CCCGTTAATCACTATGAGGCTTGGCAACATATTCAAGTGACAAATGAGATTGTTACACTCAACTATTTGGAACCTCGGACAGAATATGAACTCTGTGTGC	TEK receptor tyrosine kinase
TF	NM_001063.2		CTGCTCCACCCTTAACCAATACTTCGGCTACTCGGGAGCCTTCAAGTGTCTGAAGGATGGTGCTGGGGATGTGGCCTTTGTCAAGCACTCGACTATATTT	transferrin
TFDP1	NM_007111.4		GCCGCTTATTTGCCGTGAGTTTGGACGGCACCCCTGCTGGCGGATAGCAAGACTCTGTGGAGTTTGTTCAGTGGTACGGTGTCCAAGCAAACAGCAGAAT	transcription factor Dp-1
TFPI2	NM_006528.3		GCAACGCCAACAATTTCTACACCTGGGAGGCTTGCGACGATGCTTGCTGGAGGATAGAAAAAGTTCCCAAAGTTTGCCGGCTGCAAGTGAGTGTGGACGA	tissue factor pathway inhibitor 2
TGFB1	NM_000660.3	TGFB,DPD1;transforming growth factor, beta 1	TATATGTTCTTCAACACATCAGAGCTCCGAGAAGCGGTACCTGAACCCGTGTTGCTCTCCCGGGCAGAGCTGCGTCTGCTGAGGCTCAAGTTAAAAGTGG	transforming growth factor beta 1
TGFB2	NM_003238.2	transforming growth factor, beta 2	AAGCCAGAGTGCCTGAACAACGGATTGAGCTATATCAGATTCTCAAGTCCAAAGATTTAACATCTCCAACCCAGCGCTACATCGACAGCAAAGTTGTGAA	transforming growth factor beta 2
TGFBI	NM_000358.2	CSD3,LCD1,CSD1,CSD2;transforming growth factor, beta-induced, 68kD,transforming growth factor, beta-induced, 68kDa	GTGGTCCATGTCATCACCAATGTTCTGCAGCCTCCAGCCAACAGACCTCAGGAAAGAGGGGATGAACTTGCAGACTCTGCGCTTGAGATCTTCAAACAAG	transforming growth factor beta induced
TGFBR2	NM_001024847.1	MFS2;transforming growth factor, beta receptor II (70/80kDa),transforming growth factor beta receptor II	ATTTGGAGAATGTTGAGTCCTTCAAGCAGACCGATGTCTACTCCATGGCTCTGGTGCTCTGGGAAATGACATCTCGCTGTAATGCAGTGGGAGAAGTAAA	transforming growth factor beta receptor 2
THBS1	NM_003246.2		ACCCTCGTCACATAGGCTGGAAAGATTTCACCGCCTACAGATGGCGTCTCAGCCACAGGCCAAAGACGGGTTTCATTAGAGTGGTGATGTATGAAGGGAA	thrombospondin 1
THBS2	NM_003247.2		AAACATCCTTGCAAATGGGTGTGACGCGGTTCCAGATGTGGATTTGGCAAAACCTCATTTAAGTAAAAGGTTAGCAGAGCAAAGTGCGGTGCTTTAGCTG	thrombospondin 2
THBS4	NM_003248.3		GCAGTTCTTGGGTCAAATGACACAATTAAACCAACTCCTGGGAGAGGTGAAGGACCTTCTGAGACAGCAGGTTAAGGAAACATCATTTTTGCGAAACACC	thrombospondin 4
THY1	NM_006288.2		CCTGCCTAGTGGACCAGAGCCTTCGTCTGGACTGCCGCCATGAGAATACCAGCAGTTCACCCATCCAGTACGAGTTCAGCCTGACCCGTGAGACAAAGAA	Thy-1 cell surface antigen
TIE1	NM_005424.2	TIE;tyrosine kinase with immunoglobulin and epidermal growth factor homology domains 1,tyrosine kinase with immunoglobulin-like and EGF-like domains 1	CATCGGGGAGGGGAACTTCGGCCAGGTCATCCGGGCCATGATCAAGAAGGACGGGCTGAAGATGAACGCAGCCATCAAAATGCTGAAAGAGTATGCCTCT	tyrosine kinase with immunoglobulin like and EGF like domains 1
TIMP1	NM_003254.2	TIMP,CLGI;tissue inhibitor of metalloproteinase 1 (erythroid potentiating activity, collagenase inhibitor)	CGTGGGGACACCAGAAGTCAACCAGACCACCTTATACCAGCGTTATGAGATCAAGATGACCAAGATGTATAAAGGGTTCCAAGCCTTAGGGGATGCCGCT	TIMP metallopeptidase inhibitor 1
TIMP2	NM_003255.4	tissue inhibitor of metalloproteinase 2	GAAGGAGCCCCATCAATCCTATTAATCCTCAGAATTCCAGTGGGAGCCTCCCTCTGAGCCTTGTAGAAATGGGAGCGAGAAACCCCAGCTGAGCTGCGTT	TIMP metallopeptidase inhibitor 2
TIMP4	NM_003256.2	tissue inhibitor of metalloproteinase 4	ACATCCCTTCAAGAGTCCTGAAGATCAAGCCAGTTCTCCTTCCCTGCAGAGCTTTGGCCATTACCACCTGACCTCTTGCTGCCAGCTAATAAGAAGTGCC	TIMP metallopeptidase inhibitor 4
TJP2	NM_004817.2	DFNA51;deafness, autosomal dominant 51	AGCCAATGATAGCTGGTTTGGCAGCTTAAAGGACACTATTCAGCATCAGCAAGGAGAAGCGGTTTGGGTCTCTGAAGGAAAGATGGAAGGGATGGATGAT	tight junction protein 2
TJP3	NM_014428.1		AGTGGTGTTGCGAGAAGCCAGTTTCAAGCGCCCGGTAGTGATCCTGGGACCCGTGGCCGACATTGCTATGCAGAAGTTGACTGCTGAGATGCCTGACCAG	tight junction protein 3
TLR4	NR_024168.1	toll-like receptor 4	TCATCCATGAAGGTTTCCATAAAAGCCGAAAGGTGATTGTTGTGGTGTCCCAGCACTTCATCCAGAGCCGCTGGTGTATCTTTGAATATGAGATTGCTCA	toll like receptor 4
TMC6	NM_001127198.1	EVER1;epidermodysplasia verruciformis 1	GCCTACCTCTCCACTGTGGGCGTGAGCTTCTTTATCACCTGCATCACCCTGGTGTACAGCATGGCTCACTCTTTCGGGGAGAGCTACCGGGTGGGCAGCA	transmembrane channel like 6
TMEM100	NM_018286.2		AGCCAAGAGACGGGAGAGTCAAACAGCTCTCGTGGCAAATCAGAGAAGCTTGTTTGCTTGAGACTGAATACGACCAAATGGGCCATTGGGCCTGGAAAAC	transmembrane protein 100
TMEM30B	NM_001017970.2		TTTCGGATAGTAATTTGTTCCCAGGGGCAGTGACAACCATGATGTTCCAGGTTTGGTCTGGCACTCTGCCTTGAACGTAGGAAGCTCTTGATGATTTGTG	transmembrane protein 30B
TMPRSS2	NM_005656.3		AGACAATCTTTCATGTTCTATGGAGCCGGATACCAAGTAGAAAAAGTGATTTCTCATCCAAATTATGACTCCAAGACCAAGAACAATGACATTGCGCTGA	transmembrane protease, serine 2
TMPRSS4	NM_019894.3		CCCAAAGACAATGACATCGCCCTCATGAAGCTGCAGTTCCCACTCACTTTCTCAGGCACAGTCAGGCCCATCTGTCTGCCCTTCTTTGATGAGGAGCTCA	transmembrane protease, serine 4
TMPRSS6	NM_153609.2		AGCCTTGCCTCCAGAGAGCAGATTCCAGCTTCGGAAGCCCCTGGTCTAACTTGGGATCTGGGAATGGAAGGTGCTCCCATCGGAGGGGACCCTCAGAGCC	transmembrane protease, serine 6
TNC	NM_002160.3	HXB,DFNA56;hexabrachion (tenascin C, cytotactin),deafness, autosomal dominant 56	TGTGTGCCACGATGGCTTTGCAGGCGATGACTGCAACAAGCCTCTGTGTCTCAACAATTGCTACAACCGTGGACGATGCGTGGAGAATGAGTGCGTGTGT	tenascin C
TNF	NM_000594.2	TNFA;tumor necrosis factor (TNF superfamily, member 2)	AGCAACAAGACCACCACTTCGAAACCTGGGATTCAGGAATGTGTGGCCTGCACAGTGAAGTGCTGGCAACCACTAAGAATTCAAACTGGGGCCTCCAGAA	tumor necrosis factor
TNFRSF12A	NM_016639.1	tumor necrosis factor receptor superfamily, member 12A	GCCCAGGGTTCAGGGGAACCTTCCAAGGTGTCTGGTTGCCCTGCCTCTGGCTCCAGAACAGAAAGGGAGCCTCACGCTGGCTCACACAAAACAGCTGACA	TNF receptor superfamily member 12A
TNFRSF1A	NM_001065.2	TNFR1;tumor necrosis factor receptor superfamily, member 1A	ACGGACTGCAGGGAGTGTGAGAGCGGCTCCTTCACCGCTTCAGAAAACCACCTCAGACACTGCCTCAGCTGCTCCAAATGCCGAAAGGAAATGGGTCAGG	TNF receptor superfamily member 1A
TNFSF10	NM_003810.2	tumor necrosis factor (ligand) superfamily, member 10	GGGGGGACCCAGCCTGGGACAGACCTGCGTGCTGATCGTGATCTTCACAGTGCTCCTGCAGTCTCTCTGTGTGGCTGTAACTTACGTGTACTTTACCAAC	TNF superfamily member 10
TNFSF12	NM_003809.2	tumor necrosis factor (ligand) superfamily, member 12	GCGCCTTTCCTGAACCGACTAGTTCGGCCTCGCAGAAGTGCACCTAAAGGCCGGAAAACACGGGCTCGAAGAGCGATCGCAGCCCATTATGAAGTTCATC	TNF superfamily member 12
TNFSF13	NM_003808.3	tumor necrosis factor (ligand) superfamily, member 13	AGTCAGAGAGCCGGCACTCTCAGTTGCCCTCTGGTTGAGTTGGGGGGCAGCTCTGGGGGCCGTGGCTTGTGCCATGGCTCTGCTGACCCAACAAACAGAG	TNF superfamily member 13
TNMD	NM_022144.2		GGAAATTGATCCTGTGACCAGAACTGAAATATTCAGAAGCGGAAATGGCACTGATGAAACATTGGAAGTGCACGACTTTAAAAACGGATACACTGGCATC	tenomodulin
TNN	NM_022093.1		GCGGTATGAGGTGAGAGTGGATTTACAGACTGCCAATGAATCTGCCTATGCTATATATGATTTCTTCCAAGTGGCCTCCAGCAAGGAGCGGTATAAGCTG	tenascin N
TNS1	NM_022648.4	TNS,MXRA6;tensin,matrix-remodelling associated 6	GCCACCGTGGGACATCAAGTGGAAGAACTTGTTTGCTTGAAAGTATCTCAGACCCAAGGCACCTCAGGTCTCTTTGCTGTGCCTCCACTATATTGTCGTG	tensin 1
TNXB	NM_032470.3	TNXB1,TNXB2	CCCAGAAACTCCAGGGGCTGATCCCAGGCGCTCGCTATGAGGTGACCGTGGTCTCGGTCCGAGGCTTTGAGGAGAGTGAGCCTCTCACAGGCTTCCTCAC	tenascin XB
TOM1L1	NM_005486.2	target of myb1 (chicken) homolog-like 1,target of myb1 (chicken)-like 1	TCATCAAATCCTCCAACATCTGTCCCTACTGCACCAGCTCTTTCTTCTGTAATTGCTCCAAAGAACTCGACTGTTACATTGGTCCCAGAACAGATTGGAA	target of myb1 like 1 membrane trafficking protein
TP53	NM_000546.2		GGGGAGCAGGGCTCACTCCAGCCACCTGAAGTCCAAAAAGGGTCAGTCTACCTCCCGCCATAAAAAACTCATGTTCAAGACAGAAGGGCCTGACTCAGAC	tumor protein p53
TPM2	NM_003289.3	AMCD1;arthrogryposis multiplex congenital, distal, type 1,tropomyosin 2 (beta)	AAGATAAATATGAAGAGGAGATCAAACTGTTGGAGGAGAAGCTGAAGGAGGCTGAGACCCGAGCAGAGTTTGCCGAGAGGTCTGTGGCAAAGTTGGAGAA	tropomyosin 2
TPSB2	NM_024164.5	tryptase beta 2	GAGCGCCTCCCACCGCCATTTCCTCTGAAGCAGGTGAAGGTCCCCATAATGGAAAACCACATTTGTGACGCAAAATACCACCTTGGCGCCTACACGGGAG	tryptase beta 2 (gene/pseudogene)	TPSAB1 (NM_003294)
TPSD1	NM_012217.2		CACCTTTGCAACGCGGAATATCACACCGGCCTCCATACGGGCCACAGCTTTCAAATCGTCCGCGATGACATGCTGTGTGCGGGGAGCGAAAATCACGACT	tryptase delta 1
TSHR	NM_001018036.2		GGATATGCTTTCAATGGGACAAAGCTGGATGCTGTTTACCTAAACAAGAATAAATACCTGACAGTTATTGACAAAGATGCATTTGGAGGAGTATACAGTG	thyroid stimulating hormone receptor
TSPAN1	NM_005727.2		ACAGGAGCCACCATGCAGTGCTTCAGCTTCATTAAGACCATGATGATCCTCTTCAATTTGCTCATCTTTCTGTGTGGTGCAGCCCTGTTGGCAGTGGGCA	tetraspanin 1
TWIST1	NM_000474.3	ACS3,BPES3,TWIST,CRS;blepharophimosis, epicanthus inversus and ptosis 3,acrocephalosyndactyly 3,twist homolog 1 (Drosophila),twist basic helix-loop-helix transcription factor 1,craniosynostosis	GACAGCCTGAGCAACAGCGAGGAAGAGCCAGACCGGCAGCAGCCGCCGAGCGGCAAGCGCGGGGGACGCAAGCGGCGCAGCAGCAGGCGCAGCGCGGGCG	twist family bHLH transcription factor 1
TWIST2	NM_057179.2	twist homolog 2 (Drosophila),twist basic helix-loop-helix transcription factor 2	AGCTGAGCAAGATCCAGACGCTCAAGCTGGCCGCCAGGTACATAGACTTCCTCTACCAGGTCCTGCAGAGCGACGAGATGGACAATAAGATGACCAGCTG	twist family bHLH transcription factor 2
TXNIP	NM_006472.1		TGGTCTTTAACGACCCTGAAAAGGTGTACGGCAGTGGCGAGAGGGTGGCTGGCCGGGTGATAGTGGAGGTGTGTGAAGTTACTCGTGTCAAAGCCGTTAG	thioredoxin interacting protein
TYMP	NM_001953.3	MNGIE,ECGF1;endothelial cell growth factor 1 (platelet-derived)	GCTGGACCAGGCGGGCTGCTGTATCGTGGGTCAGAGTGAGCAGCTGGTTCCTGCGGACGGAATCCTATATGCAGCCAGAGATGTGACAGCCACCGTGGAC	thymidine phosphorylase
UBA52	NM_003333.3		CCCTGCACCTGGTGTTGCGCCTGCGAGGTGGCATTATTGAGCCTTCTCTCCGCCAGCTTGCCCAGAAATACAACTGCGACAAGATGATCTGCCGCAAGTG	ubiquitin A-52 residue ribosomal protein fusion product 1
UTS2	NM_006786.3		GAATCTGGAAACCATACAAGAAACGTGAGACTCCTGATTGCTTCTGGAAATACTGTGTCTGAAGTGAAATAAGCATCTGTTAGTCAGCTCAGAAACACCC	urotensin 2
VAMP8	NM_003761.3		AAGACAGAGGATCTGGAAGCCACATCTGAGCACTTCAAGACGACATCGCAGAAGGTGGCTCGAAAATTCTGGTGGAAGAACGTGAAGATGATTGTCCTTA	vesicle associated membrane protein 8
VASH1	NM_014909.4	KIAA1036;KIAA1036	TCCGAGCTGTCTGGCCTCAGTTTCCCTCCGACTTTTCTCCGCTCTGCCAGCCCTCACTGCTGCCCGTCATTGTTCTCGCAGTTAGATGGGGGTGCTTTGT	vasohibin 1
VAV2	NM_003371.3	vav 2 oncogene,vav 2 guanine nucleotide exchange factor	AGGGTGTTGAGAATCCTAAACTCGAACCGTTTCACTGTCAGCCTGCCCTCGGCGACCCATCACTGGGTATGCTATTGTACATAGAGGAAACCTGGGCTAG	vav guanine nucleotide exchange factor 2
VAV3	NM_001079874.1	vav 3 oncogene,vav 3 guanine nucleotide exchange factor	GCAGTCAAGCCTTGCCCATGTGTGCCCAAACCAGTAGATTATTCTTGCCAACCCTGGTATGCTGGAGCAATGGAAAGATTGCAAGCAGAGACCGAACTTA	vav guanine nucleotide exchange factor 3
VCAM1	NM_001078.3		CAGACTTCCCTGAATGTATTGAACTTGGAAAGAAATGCCCATCTATGTCCCTTGCTGTGAGCAAGAAGTCAAAGTAAAACTTGCTGCCTGAAGAACAGTA	vascular cell adhesion molecule 1
VCAN	NM_004385.3	CSPG2;chondroitin sulfate proteoglycan 2	GCAGGGTGCCCATCTCACAAGCATCCTGTCTCACGAAGAACAAATGTTTGTTAATCGTGTGGGCCATGATTATCAGTGGATAGGCCTCAATGACAAGATG	versican
VEGFA	NM_001025366.1	VEGF;vascular endothelial growth factor	GAGTCCAACATCACCATGCAGATTATGCGGATCAAACCTCACCAAGGCCAGCACATAGGAGAGATGAGCTTCCTACAGCACAACAAATGTGAATGCAGAC	vascular endothelial growth factor A
VEGFB	NM_003377.3	VRF	TGCCGGAAGCTGCGAAGGTGACACATGGCTTTTCAGACTCAGCAGGGTGACTTGCCTCAGAGGCTATATCCCAGTGGGGGAACAAAGAGGAGCCTGGTAA	vascular endothelial growth factor B
VEGFC	NM_005429.2		GGCGAGGCCACGGCTTATGCAAGCAAAGATCTGGAGGAGCAGTTACGGTCTGTGTCCAGTGTAGATGAACTCATGACTGTACTCTACCCAGAATATTGGA	vascular endothelial growth factor C
VEZF1	NM_007146.2	ZNF161;zinc finger protein 161	GTACCATCTCAATCGACACAAGCTCTCCCATTCAGATGAGAAACCCTTTGAGTGTCCTATTTGTAATCAGCGCTTCAAGAGGAAGGACCGGATGACTTAC	vascular endothelial zinc finger 1
VHL	NM_000551.2	von Hippel-Lindau syndrome,von Hippel-Lindau tumor suppressor, E3 ubiquitin protein ligase	GGAAGACTGAGGCATCCGTGAGGCAGGGACAAGTCTTTCTCCTCTTTGAGACCCCAGTGCCTGCACATCATGAGCCTTCAGTCAGGGTTTGTCAGAGGAA	von Hippel-Lindau tumor suppressor
VIM	NM_003380.2		GAGGAGATGCTTCAGAGAGAGGAAGCCGAAAACACCCTGCAATCTTTCAGACAGGATGTTGACAATGCGTCTCTGGCACGTCTTGACCTTGAACGCAAAG	vimentin
VIT	NM_053276.3		AATACTTGTTCGGAAGGTTGCTGGACAGTCTGGTTACAAAGGGAGTTATTCCAACGGTGTCCAATCGTTATCCCTACCACGATGGAGAGAATCCTTTATC	vitrin
VPS13A	NM_033305.2	CHAC;chorea acanthocytosis,vacuolar protein sorting 13A (yeast),vacuolar protein sorting 13 homolog A (S. cerevisiae)	TGTTAAACCTCCAAAGTCGGTCACCATGGATTCAGCACCAAAGCCCTTTACAGATGTCAGTATTGTCATGAGATCTGCAGGACATTCCCAGATATCACGT	vacuolar protein sorting 13 homolog A
VSIG4	NM_001100431.1		CACCTAACAGTGGACACTTATGGCCGTCCCATCCTGGAAGTGCCAGAGAGTGTAACAGGACCTTGGAAAGGGGATGTGAATCTTCCCTGCACCTATGACC	V-set and immunoglobulin domain containing 4
VWA1	NM_199121.2		GTCACAAGGCCACTGCACGCTTTTCGACATGCACCTGGAAATCGGGAAGGGCCATGCTGCAGTTGCTTCTAGTTGAGACGAGAAGAGCGACAAGGTTGTG	von Willebrand factor A domain containing 1
VWA2	NM_001272046.1		CGTTTGTGACTTCTGGCGACTGCCTTTTGTGTGTGGAAGAGACTTGGAAAGGTCTCAGACTGAAATGTGACCAATTAACCAGCTTGTTTGATGATGGGGG	von Willebrand factor A domain containing 2
WARS	NM_004184.3	IFI53	ATCCCAGCCCAGTCAAAGCACCGCCACCTGTAGGCTTCTGTCTCATGGTAATTACTGGGCCTGGCCTCTGTAAGCCTGTGTATGTTATCAATACTGTTTC	tryptophanyl-tRNA synthetase
WIPF1	NM_001077269.1	WASPIP;Wiskott-Aldrich syndrome protein interacting protein,WAS/WASL interacting protein family, member 1	TCCCATCCCGAGGTGATCTTTGCCTGCTCTTCTCTACCCAAGCTCAAGAGCTGCTTCTGTTGCTATCTAAGAACTGCATACCCTCCTCCCTGCTTCTTCC	WAS/WASL interacting protein family member 1
WNT5A	NM_003392.3	wingless-type MMTV integration site family, member 5A	ACCCTGTTCAGATGTCAGAAGTATATATTATAGGAGCACAGCCTCTCTGCAGCCAACTGGCAGGACTTTCTCAAGGACAGAAGAAACTGTGCCACTTGTA	Wnt family member 5A
WNT5B	NM_032642.2	wingless-type MMTV integration site family, member 5B	GGTGCTCTCTTACTCTTTCATCCACGTGCACTTGTGCGGCATCTGCAGTTTACAGGAACGGCTCCTTCCCTAAAATGAGAAGTCCAAGGTCATCTCTGGC	Wnt family member 5B
WWTR1	NM_001168278.1		TCCCCATGGAAGCTGAGACTCTTGCCCCAGTTCAGGCTGCTGTCAACCCACCCACGATGACCCCAGACATGAGATCCATCACTAATAATAGCTCAGATCC	WW domain containing transcription regulator 1
ZC3H12A	NM_025079.2		TAGCTGTCTGCCTCAGTGGGTCAGAAGCGATCACCCTGTTGATACACATTGTATCTCTGTAGTTTAAGGAGACGCTGCCGGTAACGGCGTCGGTCCGTGG	zinc finger CCCH-type containing 12A
ZCCHC24	XM_005269604.1	C10orf56;chromosome 10 open reading frame 56	TGCACTCCAGCTATCTCAACAGCTTCTTCCAGCTGCAGCGCGGAGAGGCGCTGAGCAACAGTGTGTACAAGGGCGCCTCACCCTATGGCTCCCTCAACAA	zinc finger CCHC-type containing 24
ZEB1	NM_001128128.1	TCF8,PPCD3;transcription factor 8 (represses interleukin 2 expression),posterior polymorphous corneal dystrophy 3	TTACAAAATGGGGTTTTCACTGGTGGTGGCCCATTACAGGCAACCAGTTCTCCTCAGGGCATGGTGCAAGCTGTTGTTCTGCCAACAGTTGGTTTGGTGT	zinc finger E-box binding homeobox 1
ZEB2	NM_014795.3	ZFHX1B;zinc finger homeobox 1b	CCCCGGTGCAAGAGGCGCAAACAAGCCAATCCCAGGAGGAAAAACGTGGTGAACTATGACAATGTAGTGGACACAGGTTCTGAAACAGATGAGGAAGACA	zinc finger E-box binding homeobox 2
ZFPM2	NM_012082.3	zinc finger protein, multitype 2	GCTGCTCATTCTGCTGATCCTGAGAATCCACTTCTTCAAACATCTTGCATCAATTCTTCCACTGTCTTAGATTTAATTGGGCCAAATGGGAAGGGCCATG	zinc finger protein, FOG family member 2
ZFYVE16	NM_001105251.2	zinc finger, FYVE domain containing 16	CAAAGGACCTGAATAAGCCAGATGTTCCAGATACAATAGAAAGTGAACCCAGCACAGCAGATACCGTTGTTCCAATCACTTGTGCTATAGATTCTACAGC	zinc finger FYVE-type containing 16
ZFYVE9	NM_004799.2	MADHIP;MAD, mothers against decapentaplegic homolog (Drosophila) interacting protein, receptor activation anchor,zinc finger, FYVE domain containing 9	AGATCTCCACTAGACCATGCCTTGCATTAGCTCCAGATAGCCCAGATAATGATCTCAGAGCTGGTCAGTTTGGAATTTCTGCCAGAAAGCCATTCACCAC	zinc finger FYVE-type containing 9
Internal Reference Genes
AGK	NM_018238.3	MULK;multiple substrate lipid kinase	GATGCTGGCGTCAAAGTTAGCAAGTACTGGTATCTTGGGCCTCTAAAAATCAAAGCAGCCCACTTTTTCAGCACTCTTAAGGAGTGGCCTCAGACTCATC	acylglycerol kinase
AMMECR1L	NM_001199140.1	AMME chromosomal region gene 1-like,AMMECR1-like	GGCTCAGTGGTTTTTGGAGTGAAGAAGCCTTACTCCCTGCACATTCCCTCATGCTCCCACACAAGTCCAGCAATGGAAATGCTTGGGTTCCTCTTGCTTT	AMMECR1 like
CC2D1B	NM_032449.2		TTGCATAAGCACAGCTCAAGAACTGAGCTTTGTATGTGTCCTTTTGGGGGATAACAGGGCTGGACCATGCTTCCCTGCCCTTAAACGCAGAGCTTTTAGT	coiled-coil and C2 domain containing 1B
CNOT10	NM_001256741.1	CCR4-NOT transcription complex, subunit 10	TGCTGCAGAAGCCCTCATCTCTCTCGACAGAATATCTGATGCCATTACTCACTTGAACCCGGAGAATGTCACTGATGTCTCCTTAGGGATCTCTTCAAAT	CCR4-NOT transcription complex subunit 10
CNOT4	NM_001190848.1	NOT4;CCR4-NOT transcription complex, subunit 4	AAGTGCCAGTGCTTATGTAACCTATATCCGGTCAGAAGACGCTCTCAGAGCCATACAGTGTGTCAACAATGTGGTAGTAGATGGCAGAACACTTAAGGCA	CCR4-NOT transcription complex subunit 4
COG7	NM_153603.3		TGTGTCTGATTTCACCAGCACTCTCCAGTCCATACGAAAGAAGTGCAAACTGGACCACATTCCTCCCAACTCCCTCTTCCAGGAAGATTGGACGGCTTTT	component of oligomeric golgi complex 7
DDX50	NM_024045.1	DEAD (Asp-Glu-Ala-Asp) box polypeptide 50,DEAD-box helicase 50	CTACTGTGGAACATTTGGCCATCCAGTGTCATTGGTCTCAGAGGCCAGCAGTTATTGGAGATGTCCTTCAAGTCTACAGTGGGTCTGAAGGGAGGGCTAT	DExD-box helicase 50
DHX16	NM_001164239.1	DDX16;DEAD/H (Asp-Glu-Ala-Asp/His) box polypeptide 16,DEAH (Asp-Glu-Ala-His) box polypeptide 16	CCCGTGTCAACTTCTTTCTCCCTGGCGGTGACCACCTGGTTCTGCTAAATGTTTACACACAGTGGGCTGAGAGTGGTTACTCTTCCCAGTGGTGCTATGA	DEAH-box helicase 16
DNAJC14	NM_032364.5	DnaJ (Hsp40) homolog, subfamily C, member 14	TCGTTTTCTTAAGCTGCTGGGTGCTTTGCTGCTCCTGGCTCTGGCCCTCTTTTTGGGCTTTCTACAGTTGGGATGGCGGTTTCTGGTGGGACTAGGTGAC	DnaJ heat shock protein family (Hsp40) member C14
EDC3	NM_001142443.1	YJDC;yjeF domain containing (E.coli),enhancer of mRNA decapping 3 homolog (S. cerevisiae)	GGAATCCTTGAGTCAGTCCAAAAGTTTCCGTCGTCGGCACAACTCCTGGTCATCTAGTAGCAGGCACCCAAATCAGGCAACTCCCAAGAAAAGTGGTTTA	enhancer of mRNA decapping 3
EIF2B4	NM_172195.3	eukaryotic translation initiation factor 2B, subunit 4 (delta, 67kD),eukaryotic translation initiation factor 2B, subunit 4 delta, 67kDa	ATGTACCAGTGCTGGTTTGCTGTGAAACATACAAGTTCTGTGAGCGTGTGCAGACTGATGCCTTTGTCTCTAATGAGCTAGATGACCCTGATGATCTGCA	eukaryotic translation initiation factor 2B subunit delta
ERCC3	NM_000122.1	excision repair cross-complementing rodent repair deficiency, complementation group 3,excision repair cross-complementation group 3	AAGCAAATGTCCTCATTCAGATCTCATCCCATGGTGGCTCCAGGCGTCAGGAAGCCCAAAGGCTAGGGCGGGTGCTTCGAGCTAAAAAAGGGATGGTTGC	ERCC excision repair 3, TFIIH core complex helicase subunit
FCF1	NM_015962.4	C14orf111;chromosome 14 open reading frame 111,FCF1 small subunit (SSU) processome component homolog (S. cerevisiae)	CAGCTAGAGAAACAGGGTATTTACAATGCCTGGGAAAGGAGGAGAGATAAGGCTCACTAGCCACAGAAAAACAGGCAGTTAATTTTTAAAGGACTCCAGC	FCF1, rRNA-processing protein
GPATCH3	NM_022078.2	GPATC3	AGTCTGGGAGCAGCAGTCTTCGTGGCTGGTTCAGGGTGTTTTGTTCCGAGCCTGCCTGCCTGCCGGTTCTATACCTCAGGGGCATTTTTACAAAAAGCCC	G-patch domain containing 3
HDAC3	NM_003883.2		CTGGGAAAGAGTCTGGAGACCACATTTGGTTCTCGAACCATCTACCTGCTTTTCCTCTCTCTCCCAAGGCCTGACAATGGTACCTATTAGGGATGGAGAT	histone deacetylase 3
MRPS5	NM_031902.3		ATCCCTACGCCAGCTTGAGCCGTGCACTGCAGACACAATGCTGTATTTCTTCTCCCAGTCACCTGATGAGCCAGCAGTATAGACCATATAGTTTCTTCAC	mitochondrial ribosomal protein S5
MTMR14	NM_022485.3	C3orf29;chromosome 3 open reading frame 29	CATCAAGCTGCTTCGATACCTGTCAGTCAAATACATCTGTGACCTGATGGTGGAGAACAAGAAGGTGAAGTTTGGCATGAATGTAACCTCCTCTGAGAAG	myotubularin related protein 14
NOL7	NM_016167.3	C6orf90,PQBP3;chromosome 6 open reading frame 90,polyglutamine binding protein 3,nucleolar protein 7, 27kDa	GAGGAGCTGTTCATCGAACAGAAGAAAAGAAAACTCCTTCCAGACACTATTTTGGAGAAGTTAACCACAGCTTCACAGACTAACATCAAGAAATCGCCAG	nucleolar protein 7
NUBP1	NM_001278506.1	NBP1;nucleotide binding protein 1 (E.coli MinD like),nucleotide binding protein 1 (MinD homolog, E. coli)	CCCATGGCCTAGCAGAGGATGAAAACACACAGATTGCTCTTCTAGACATCGATATATGTGGGCCATCGATTCCCAAGATAATGGGATTGGAAGGAGAGCA	nucleotide binding protein 1
PRPF38A	NM_032864.3	PRP38 pre-mRNA processing factor 38 (yeast) domain containing A	GAACTTGTAGTCGATAAAGCCATGGAGTTAAGGTTTGTGGGTGGCGTCTATGGTGGCAACATAAAACCAACACCCTTTCTGTGTTTAACCTTGAAGATGC	pre-mRNA processing factor 38A
SAP130	NM_024545.3	sin3A-associated protein, 130kDa	GATCTCCACCGAATAAACGAACTGATACAGGGAAATATGCAGAGGTGTAAACTTGTGATGGATCAAATCAGTGAAGCCAGAGACTCCATGCTTAAGGTTT	Sin3A associated protein 130
SF3A3	NM_006802.2	splicing factor 3a, subunit 3, 60kD,splicing factor 3a, subunit 3, 60kDa	TCAGCTTAGTTAGCCATTGATGCAAATACTAGGGAAAGACTAGGAGGATGAGCCAGGGTTGCTACTAAGGACTAAGTGTCGCACCAAGGTTTGCCTTTTG	splicing factor 3a subunit 3
TLK2	NM_006852.2	tousled-like kinase 2	ATTCGACGATGCTTGGCCTACCGAAAGGAGGACCGCATTGATGTCCAGCAGCTGGCCTGTGATCCCTACTTGTTGCCTCACATCCGAAAGTCAGTCTCTA	tousled like kinase 2
TMUB2	NM_024107.2	transmembrane and ubiquitin-like domain containing 2	ATTTCTCAGCCAAATACTCATCTTTTGAGACTGAAATCACACTGGCGGGAATGAAGATTGTGCCAGCCTTCTCTTATGGGCACCTAGCCGCCTTCACCTT	transmembrane and ubiquitin like domain containing 2
TRIM39	NM_021253.3	RNF23;ring finger protein 23,tripartite motif-containing 39	CTGCTATTCGGGTAATCTTCACAGAAATGACTGAGAGAAGAATCTGCAGTTTACTGAGGGCATTTCAGTTCCTCCTACCACCTCAACAGGACTTTGTCCA	tripartite motif containing 39
USP39	NM_001256725.1	ubiquitin specific protease 39	TATGCCAACGCTGTCCTTCAGGCTCTATCTAATGTTCCTCCTCTCCGGAACTACTTTCTGGAAGAAGACAATTATAAGAACATCAAACGTCCTCCAGGGG	ubiquitin specific peptidase 39
ZC3H14	NM_001160103.1		TTGGGGCATGTTTGTGCACTGCTGTTGTGAGGATCAGCATATGAAATTGACATCATGGTTAGTCATGGTACTGCAGCTTAGGGGGCTACACGGTTGCTGT	zinc finger CCCH-type containing 14
ZKSCAN5	NM_014569.3	ZFP95;zinc finger protein homologous to Zfp95 in mouse,zinc finger protein 95 homolog (mouse)	CCCAGAAATAGACCTCTCCTGTAGAGTGGTGATATACAGAATGAGTTTCAGTTTGCATTGCAGCTGGGATTGAAAGTAATCAGTCGTGAGCAGGCAGGCA	zinc finger with KRAB and SCAN domains 5
ZNF143	NM_003442.5	zinc finger protein 143 (clone pHZ-1)	TGAGCATGCAGGCTGTGGGAAGGCATTTGCAACAGGTTATGGATTAAAAAGTCACGTCAGAACTCATACAGGAGAAAAGCCATATCGGTGTTCGGAAGAT	zinc finger protein 143
ZNF346	NM_012279.2		CACTGAAGCATCCAAATAAAGAATTTCCCTCATGGGCCAGACTACAACTTAACAGACCTAGGGTTTTGAGCCATATTGCCATTGGATCTAGTATGTCTGT	zinc finger protein 346
© 2015-2018 NanoString Technologies						LBL-10095-02
