# Supplementary material for: Evaluation of Orbital Lymphoproliferative and Inflammatory Disorders by Gene Expression Analysis
Source: Int J Mol Sci. 2022 Aug 3;23(15):8609. doi: 10.3390/ijms23158609 (PMC9369106; doi:10.3390/ijms23158609)
Supplement: Supplementary file 1 [file ijms-23-08609-s001.zip › Table S2.csv]

Test	Gene	p-Value	lower CI	higher CI
Students t-Test	NSOI by AAMP	0.93	-162.3	150.7
Students t-Test	NSOI by ABI3BP	0.25	-166.3	550
Students t-Test	NSOI by ACVR1	0.62	-57.8	92.5
Students t-Test	NSOI by ACVRL1	0.12	-29.4	214.7
Students t-Test	NSOI by ADAM15	0.92	-446.5	488.2
Students t-Test	NSOI by ADAM17	0.16	-206.2	40.8
Students t-Test	NSOI by ADAM9	0.49	-242.9	128.3
Wilcox Rank Sum Test	NSOI by ADAMTS1	0.18	-59	722
Wilcox Rank Sum Test	NSOI by ADAP1	0.59	-78	55
Students t-Test	NSOI by AEBP1	0.37	-744	1822.7
Students t-Test	NSOI by AGGF1	0.35	-41.1	105.4
Wilcox Rank Sum Test	NSOI by AGRN	0.065	-117	195
Students t-Test	NSOI by AHNAK	0.72	-699.4	501.7
Wilcox Rank Sum Test	NSOI by AKAP12	0.2	-24	193
Students t-Test	NSOI by AKT1	0.76	-508.9	385.2
Students t-Test	NSOI by AKT2	0.77	-173.3	132.3
Students t-Test	NSOI by ALDOA	0.28	-510.2	1566.9
Students t-Test	NSOI by ANG	0.0064	21	97
Students t-Test	NSOI by ANGPT1	0.27	-21.1	66.5
Wilcox Rank Sum Test	NSOI by ANGPTL2	0.18	-30	384
Students t-Test	NSOI by ANPEP	0.56	-184.5	320.2
Students t-Test	NSOI by ANXA2P2	0.98	-2344.2	2298.2
Students t-Test	NSOI by APOD	0.69	-741.5	1078.1
Wilcox Rank Sum Test	NSOI by APOE	0.59	-2167	679
Students t-Test	NSOI by AQP1	0.0038	51.5	197.9
Students t-Test	NSOI by ATPIF1	0.18	-117.8	24.8
Wilcox Rank Sum Test	NSOI by BGN	0.59	-1637	1675
Students t-Test	NSOI by BMPR1A	0.035	6.8	145.6
Students t-Test	NSOI by C1S	0.9	-610.1	682.7
Students t-Test	NSOI by C3	0.8	-733.9	583.9
Wilcox Rank Sum Test	NSOI by C3AR1	1	-636	360
Students t-Test	NSOI by CALCRL	0.87	-134.3	155
Students t-Test	NSOI by CALD1	0.033	33.7	654
Students t-Test	NSOI by CAV1	0.92	-134.9	147.9
Students t-Test	NSOI by CCDC80	0.66	-1021	1533.3
Wilcox Rank Sum Test	NSOI by CCL5	0.7	-270	297
Students t-Test	NSOI by CCR2	0.51	-103.7	54.7
Wilcox Rank Sum Test	NSOI by CD163	1	-1674	1278
Students t-Test	NSOI by CD34	0.15	-54.7	314
Wilcox Rank Sum Test	NSOI by CD36	0.39	-464	206
Students t-Test	NSOI by CD44	0.75	-1731.4	2337.1
Wilcox Rank Sum Test	NSOI by CD46	0.94	-201	533
Students t-Test	NSOI by CDC42	0.2	-237.6	55.3
Students t-Test	NSOI by CDH11	0.94	-563.2	524.6
Students t-Test	NSOI by CDKN1A	0.45	-72.9	152.6
Wilcox Rank Sum Test	NSOI by CHI3L1	0.7	-470	850
Wilcox Rank Sum Test	NSOI by CHP1	0.39	-63	214
Wilcox Rank Sum Test	NSOI by CHRDL1	0.7	-220	106
Wilcox Rank Sum Test	NSOI by CLDN7	0.13	-12	188
Students t-Test	NSOI by CLEC2B	0.62	-393.1	248.5
Wilcox Rank Sum Test	NSOI by CLEC3B	0.093	-6	185
Students t-Test	NSOI by CLIC4	0.75	-270.5	359.9
Students t-Test	NSOI by COL18A1	0.49	-219.6	424.6
Wilcox Rank Sum Test	NSOI by COL1A1	0.39	-50463	44284
Wilcox Rank Sum Test	NSOI by COL1A2	0.59	-11139	7576
Wilcox Rank Sum Test	NSOI by COL3A1	0.48	-41920	28155
Wilcox Rank Sum Test	NSOI by COL4A1	0.59	-1198	1497
Wilcox Rank Sum Test	NSOI by COL4A2	0.7	-699	576
Wilcox Rank Sum Test	NSOI by COL5A1	0.24	-769	1394
Wilcox Rank Sum Test	NSOI by COL5A2	0.59	-1339	971
Students t-Test	NSOI by COL6A1	0.19	-244	1077.4
Students t-Test	NSOI by COL6A2	1	-2325.3	2313.3
Students t-Test	NSOI by COL6A3	0.54	-2775.3	1596.6
Wilcox Rank Sum Test	NSOI by COMP	0.48	-795	421
Students t-Test	NSOI by CRIP2	0.37	-151.2	371.5
Wilcox Rank Sum Test	NSOI by CRISPLD2	0.24	-150	356
Wilcox Rank Sum Test	NSOI by CSPG4	0.065	-2	109
Students t-Test	NSOI by CTNNB1	0.38	-181.6	429.9
Students t-Test	NSOI by CTNND1	0.93	-337.8	367.8
Students t-Test	NSOI by CTSK	0.57	-690.9	1181.5
Wilcox Rank Sum Test	NSOI by CTSL	1	-442	151
Students t-Test	NSOI by CUL1	0.8	-75.3	94.6
Students t-Test	NSOI by CXCL12	0.49	-201.2	389.9
Students t-Test	NSOI by CYB561	0.41	-104	231.3
Wilcox Rank Sum Test	NSOI by CYBB	0.59	-1071	526
Students t-Test	NSOI by CYP1B1	0.92	-232.3	254.3
Students t-Test	NSOI by DAG1	0.11	-10	72.7
Students t-Test	NSOI by DCN	0.98	-3046.4	2964.1
Students t-Test	NSOI by DDR2	0.34	-86.6	227
Wilcox Rank Sum Test	NSOI by DENND5A	0.13	-12	89
Students t-Test	NSOI by DESI1	0.26	-17.4	56.4
Students t-Test	NSOI by DICER1	0.73	-195.4	141.7
Wilcox Rank Sum Test	NSOI by DLG1	0.7	-36	67
Wilcox Rank Sum Test	NSOI by DPT	0.24	-322	477
Students t-Test	NSOI by DPYSL3	0.57	-314.3	531.3
Wilcox Rank Sum Test	NSOI by DSC2	0.48	-78	248
Students t-Test	NSOI by DST	0.12	-52.5	390.5
Students t-Test	NSOI by ECM2	0.15	-16.1	92.1
Wilcox Rank Sum Test	NSOI by ECSCR	0.26	-87	144
Wilcox Rank Sum Test	NSOI by EGFL7	0.24	-105	156
Students t-Test	NSOI by EGFR	0.13	-22.8	152.8
Students t-Test	NSOI by EGLN2	0.54	-120	67
Wilcox Rank Sum Test	NSOI by EGLN3	0.94	-219	61
Students t-Test	NSOI by EIF2AK3	0.5	-158.9	82.9
Students t-Test	NSOI by EIF4E2	0.91	-177.4	197.1
Students t-Test	NSOI by EIF4EBP1	0.41	-60.7	136.4
Students t-Test	NSOI by EMILIN1	0.98	-852.1	833.7
Students t-Test	NSOI by EMP3	0.55	-342.3	194
Wilcox Rank Sum Test	NSOI by ENO1	1	-568	533
Students t-Test	NSOI by ENO2	0.3	-98.9	34.9
Wilcox Rank Sum Test	NSOI by ENPP2	0.94	-368	212
Students t-Test	NSOI by EPAS1	0.44	-127.8	271.4
Students t-Test	NSOI by EPHB3	0.28	-36.2	106.6
Students t-Test	NSOI by EPHB4	0.35	-66	156.7
Wilcox Rank Sum Test	NSOI by ERBB2	0.03	12	183
Students t-Test	NSOI by EVI2A	0.085	-217.5	16.9
Students t-Test	NSOI by F3	0.37	-230.9	560.9
Students t-Test	NSOI by FAP	0.69	-102.8	147.8
Wilcox Rank Sum Test	NSOI by FBLN1	0.48	-1921	1978
Students t-Test	NSOI by FBLN5	0.094	-10.6	114
Wilcox Rank Sum Test	NSOI by FBN1	0.94	-799	611
Students t-Test	NSOI by FERMT2	0.62	-80.6	128.3
Students t-Test	NSOI by FGFR1	0.63	-98.9	156.2
Wilcox Rank Sum Test	NSOI by FHL1	0.065	-5	1405
Wilcox Rank Sum Test	NSOI by FLT1	0.48	-31	98
Students t-Test	NSOI by FMOD	0.54	-333	584.3
Wilcox Rank Sum Test	NSOI by FN1	0.94	-5003	4057
Students t-Test	NSOI by FOXO4	0.76	-65	86.3
Students t-Test	NSOI by FSTL1	0.78	-1384.4	1778.8
Students t-Test	NSOI by GIMAP4	0.079	-376.9	24.6
Students t-Test	NSOI by GPI	0.63	-159	100.6
Students t-Test	NSOI by GPR124	0.51	-78.6	146.2
Students t-Test	NSOI by GPR56	0.18	-39.5	177.5
Students t-Test	NSOI by GPX1	0.72	-576.8	411.8
Wilcox Rank Sum Test	NSOI by GSN	0.59	-822	2090
Students t-Test	NSOI by HDAC5	0.97	-146	141
Wilcox Rank Sum Test	NSOI by HEG1	0.39	-148	235
Students t-Test	NSOI by HGF	0.8	-83.9	105.3
Students t-Test	NSOI by HIPK1	0.55	-44.6	78.6
Students t-Test	NSOI by HIPK2	0.84	-152.6	126.6
Wilcox Rank Sum Test	NSOI by HK2	0.42	-164	95
Wilcox Rank Sum Test	NSOI by HMOX1	0.24	-334	268
Students t-Test	NSOI by HSD17B12	0.76	-94.8	125.1
Students t-Test	NSOI by HSP90B1	0.45	-452.8	219.5
Students t-Test	NSOI by HSPB1	0.4	-271.9	615.6
Students t-Test	NSOI by HSPG2	0.65	-1394.9	2094.2
Wilcox Rank Sum Test	NSOI by ICAM1	0.57	-178	522
Wilcox Rank Sum Test	NSOI by ID1	0.026	48	273
Students t-Test	NSOI by ID4	0.12	-33.5	238.2
Students t-Test	NSOI by IGF1	1	-247.7	247
Students t-Test	NSOI by IGFBP4	0.65	-1055.1	1619.1
Students t-Test	NSOI by IGFBP7	0.94	-978.1	1050.7
Wilcox Rank Sum Test	NSOI by IL1B	0.39	-22	381
Students t-Test	NSOI by ISLR	0.72	-606.6	438.3
Students t-Test	NSOI by ITGA1	0.21	-31.9	123.9
Students t-Test	NSOI by ITGA5	0.74	-188.6	257.9
Wilcox Rank Sum Test	NSOI by ITGA6	0.59	-344	197
Students t-Test	NSOI by ITGA7	0.026	17.9	218.8
Wilcox Rank Sum Test	NSOI by ITGAM	0.7	-558	108
Students t-Test	NSOI by ITGB2	0.74	-769.9	562.9
Wilcox Rank Sum Test	NSOI by ITGB4	0.13	-94	419
Wilcox Rank Sum Test	NSOI by ITM2A	0.94	-147	378
Students t-Test	NSOI by JAG1	0.13	-22.3	152.6
Students t-Test	NSOI by JAM2	0.3	-50.4	148
Students t-Test	NSOI by JAM3	0.85	-102.1	121.1
Students t-Test	NSOI by JUN	0.77	-268.5	352.2
Wilcox Rank Sum Test	NSOI by KCNJ8	0.092	-3	122
Wilcox Rank Sum Test	NSOI by KDR	0.18	-20	200
Students t-Test	NSOI by KIAA1462	0.9	-98	110.3
Students t-Test	NSOI by LAMA4	0.55	-368.7	650
Students t-Test	NSOI by LAMC1	0.61	-167	272
Students t-Test	NSOI by LDHA	0.29	-261.4	781.8
Students t-Test	NSOI by LGALS1	0.75	-1816.7	1359.7
Students t-Test	NSOI by LHFP	0.31	-52.4	147.1
Wilcox Rank Sum Test	NSOI by LOX	0.87	-251	198
Students t-Test	NSOI by LTBP4	0.18	-112.5	502.2
Wilcox Rank Sum Test	NSOI by LUM	0.7	-5062	5097
Students t-Test	NSOI by LY96	0.21	-246.1	64.1
Students t-Test	NSOI by MAF	0.69	-398	277
Wilcox Rank Sum Test	NSOI by MAP2K1	1	-54	93
Students t-Test	NSOI by MAP2K2	0.89	-367.6	322.2
Wilcox Rank Sum Test	NSOI by MAPK1	0.064	-96	0
Students t-Test	NSOI by MAPK3	0.39	-59	137.3
Students t-Test	NSOI by MCAM	0.36	-76.4	190.1
Students t-Test	NSOI by MEG3	0.18	-63.1	288.1
Students t-Test	NSOI by MEOX2	0.75	-68.7	92.1
Wilcox Rank Sum Test	NSOI by MFAP4	0.59	-572	634
Students t-Test	NSOI by MGP	0.98	-1846.1	1898.1
Students t-Test	NSOI by MMP14	0.87	-410.7	354
Wilcox Rank Sum Test	NSOI by MMP2	0.24	-731	1538
Wilcox Rank Sum Test	NSOI by MMP9	0.13	-1395	666
Students t-Test	NSOI by MMRN2	0.38	-108	253.7
Wilcox Rank Sum Test	NSOI by MPDZ	0.81	-60	112
Wilcox Rank Sum Test	NSOI by MS4A4A	0.82	-701	360
Students t-Test	NSOI by MS4A6A	0.38	-179.4	75.4
Students t-Test	NSOI by MTA1	0.44	-198.1	95.1
Students t-Test	NSOI by MTDH	0.12	-225.8	29.2
Wilcox Rank Sum Test	NSOI by MTOR	0.87	-108	35
Students t-Test	NSOI by MYC	0.5	-249.8	460.1
Wilcox Rank Sum Test	NSOI by MYH11	0.26	-19	318
Students t-Test	NSOI by MYLK	0.19	-140.3	611
Wilcox Rank Sum Test	NSOI by MYO1D	0.59	-184	63
Wilcox Rank Sum Test	NSOI by MYO5C	0.3	-16	159
Students t-Test	NSOI by NCL	0.88	-97.6	85.2
Students t-Test	NSOI by NDRG1	0.49	-262.5	508.9
Students t-Test	NSOI by NF1	0.72	-90.5	126.5
Students t-Test	NSOI by NID2	0.83	-387	319.7
Wilcox Rank Sum Test	NSOI by NME1	0.3	-157	24
Students t-Test	NSOI by NME4	0.024	8.8	90.5
Wilcox Rank Sum Test	NSOI by NOS3	0.39	-49	108
Students t-Test	NSOI by NPR1	0.56	-42.5	73.9
Students t-Test	NSOI by NR3C1	0.59	-209.5	126.8
Wilcox Rank Sum Test	NSOI by NR4A1	0.18	-50	668
Wilcox Rank Sum Test	NSOI by NR4A3	0.0087	12	165
Students t-Test	NSOI by NRP1	0.98	-779.3	801
Students t-Test	NSOI by NRP2	0.81	-336.4	269.4
Wilcox Rank Sum Test	NSOI by OGN	0.13	-44	638
Students t-Test	NSOI by OLFML2B	0.71	-278.5	199.5
Wilcox Rank Sum Test	NSOI by P3H1	0.39	-96	135
Students t-Test	NSOI by PCOLCE	0.9	-565.8	636.4
Students t-Test	NSOI by PDCL3	0.027	13.2	173.4
Students t-Test	NSOI by PDGFRB	0.19	-99.6	448.3
Wilcox Rank Sum Test	NSOI by PDK1	0.18	-554	20
Wilcox Rank Sum Test	NSOI by PDPN	0.63	-209	461
Wilcox Rank Sum Test	NSOI by PECAM1	0.94	-1826	795
Students t-Test	NSOI by PGK1	0.56	-1282.6	740.9
Students t-Test	NSOI by PIK3R1	0.93	-276.5	256.1
Students t-Test	NSOI by PIK3R2	0.65	-68.4	105.1
Wilcox Rank Sum Test	NSOI by PKM	1	-707	463
Wilcox Rank Sum Test	NSOI by PKN1	0.48	-186	47
Wilcox Rank Sum Test	NSOI by PLA2G2A	0.38	-375	2446
Wilcox Rank Sum Test	NSOI by PLAU	0.59	-319	1359
Wilcox Rank Sum Test	NSOI by PLAUR	0.75	-124	147
Students t-Test	NSOI by PLCG1	0.65	-122.9	80.5
Students t-Test	NSOI by PLXND1	0.91	-424.6	469.6
Students t-Test	NSOI by PMP22	0.14	-38.3	222.6
Wilcox Rank Sum Test	NSOI by PNPLA6	0.39	-295	144
Wilcox Rank Sum Test	NSOI by POSTN	0.7	-1957	1315
Students t-Test	NSOI by PPP2CB	0.097	-23	234.4
Students t-Test	NSOI by PPP2R1A	0.74	-251.9	184.9
Students t-Test	NSOI by PPP3R1	0.94	-241.9	226.2
Students t-Test	NSOI by PRF1	0.62	-48.3	76.7
Students t-Test	NSOI by PTEN	0.64	-301.6	193.9
Students t-Test	NSOI by PTGIS	0.69	-562.9	392.3
Students t-Test	NSOI by PTPRM	0.31	-57.2	157.9
Students t-Test	NSOI by PTTG1	0.2	-97.8	23.8
Wilcox Rank Sum Test	NSOI by PTX3	0.82	-395	687
Wilcox Rank Sum Test	NSOI by PXDN	0.75	-165	174
Students t-Test	NSOI by QKI	0.92	-418.4	380.4
Students t-Test	NSOI by RAC1	0.21	-55.5	216.5
Students t-Test	NSOI by RAMP2	0.24	-43.5	149.9
Wilcox Rank Sum Test	NSOI by RBM47	1	-66	104
Students t-Test	NSOI by RBPJ	0.66	-93.5	141.2
Students t-Test	NSOI by RBX1	0.44	-312.5	151.2
Students t-Test	NSOI by RGCC	0.33	-229.8	614.5
Students t-Test	NSOI by RHOA	0.81	-472.2	379.2
Students t-Test	NSOI by RNH1	0.71	-266.9	191.6
Students t-Test	NSOI by ROCK1	0.73	-217.2	157.6
Students t-Test	NSOI by ROCK2	0.81	-150	186.7
Students t-Test	NSOI by RPS27A	0.028	-3984	-285.6
Wilcox Rank Sum Test	NSOI by RPS6KB2	0.82	-34	54
Students t-Test	NSOI by RTN4	0.92	-270.6	296
Students t-Test	NSOI by RUNX1	0.68	-147	215.3
Wilcox Rank Sum Test	NSOI by RUNX1T1	0.065	-2	111
Wilcox Rank Sum Test	NSOI by SDC4	0.015	32	277
Students t-Test	NSOI by SERINC5	0.4	-76.8	34.1
Wilcox Rank Sum Test	NSOI by SERPINA1	0.82	-300	322
Wilcox Rank Sum Test	NSOI by SERPINE1	0.82	-266	908
Students t-Test	NSOI by SERPINF1	0.68	-2834.3	1945.3
Students t-Test	NSOI by SERPING1	0.67	-1623	1117.6
Wilcox Rank Sum Test	NSOI by SERPINH1	0.59	-1121	1098
Students t-Test	NSOI by SET	0.77	-118.9	153.6
Wilcox Rank Sum Test	NSOI by SFRP2	0.48	-2206	1048
Students t-Test	NSOI by SKP1	0.73	-487.7	671
Students t-Test	NSOI by SLC35A3	0.17	-21.4	97.4
Wilcox Rank Sum Test	NSOI by SMAD1	0.065	-2	194
Students t-Test	NSOI by SMAD2	0.17	-12.9	65.5
Students t-Test	NSOI by SMAD3	0.95	-70.1	66.4
Students t-Test	NSOI by SMAD4	0.91	-157.9	173.6
Students t-Test	NSOI by SMAD5	0.42	-120.3	55.3
Students t-Test	NSOI by SMC3	0.74	-69.7	51
Wilcox Rank Sum Test	NSOI by SNAI1	0.065	-1	111
Students t-Test	NSOI by SNAI2	0.98	-218.1	214.4
Students t-Test	NSOI by SNRPF	0.17	-139.8	29.5
Students t-Test	NSOI by SORD	0.66	-40.5	60.8
Students t-Test	NSOI by SP1	0.19	-105.1	24.4
Wilcox Rank Sum Test	NSOI by SPARC	0.82	-10797	6362
Wilcox Rank Sum Test	NSOI by SPARCL1	0.48	-982	796
Students t-Test	NSOI by SPHK2	0.83	-68.3	56.3
Wilcox Rank Sum Test	NSOI by SPINT1	0.57	-56	137
Wilcox Rank Sum Test	NSOI by SRC	0.34	-40	91
Wilcox Rank Sum Test	NSOI by SRF	0.26	-76	112
Wilcox Rank Sum Test	NSOI by SRGN	0.48	-5053	2168
Wilcox Rank Sum Test	NSOI by SRPX2	0.48	-34	163
Students t-Test	NSOI by SSTR2	0.13	-21.6	146
Students t-Test	NSOI by STAB1	0.45	-124.3	257.3
Students t-Test	NSOI by STAT1	0.37	-710.7	1757.7
Students t-Test	NSOI by STAT3	0.48	-480.4	951.7
Students t-Test	NSOI by SULF1	0.81	-299.2	371.5
Students t-Test	NSOI by TCEB1	0.6	-264.4	162.4
Students t-Test	NSOI by TFDP1	0.74	-61.6	83.6
Wilcox Rank Sum Test	NSOI by TGFB1	0.39	-600	418
Wilcox Rank Sum Test	NSOI by TGFBI	0.82	-1842	1615
Students t-Test	NSOI by TGFBR2	0.56	-573	331
Wilcox Rank Sum Test	NSOI by THBS1	0.48	-1541	2458
Wilcox Rank Sum Test	NSOI by THBS2	0.48	-553	850
Wilcox Rank Sum Test	NSOI by THY1	0.39	-227	418
Students t-Test	NSOI by TIE1	0.38	-75.3	178.6
Wilcox Rank Sum Test	NSOI by TIMP1	0.94	-6672	5044
Students t-Test	NSOI by TIMP2	0.81	-683.5	854.8
Students t-Test	NSOI by TLR4	0.65	-206.4	136.7
Wilcox Rank Sum Test	NSOI by TMEM30B	0.065	-2	190
Wilcox Rank Sum Test	NSOI by TNC	0.82	-1052	355
Students t-Test	NSOI by TNFRSF1A	0.98	-285.5	278.8
Students t-Test	NSOI by TNFSF10	0.61	-356.7	229
Students t-Test	NSOI by TNFSF12	0.74	-106.9	78.9
Wilcox Rank Sum Test	NSOI by TNFSF13	0.18	-87	446
Students t-Test	NSOI by TNS1	0.14	-56.4	351.4
Students t-Test	NSOI by TNXB	0.04	5.2	188.5
Wilcox Rank Sum Test	NSOI by TPM2	0.18	-539	3739
Wilcox Rank Sum Test	NSOI by TPSB2	0.7	-460	371
Wilcox Rank Sum Test	NSOI by TWIST1	0.31	-137	191
Students t-Test	NSOI by TXNIP	0.057	-7440.6	141.2
Wilcox Rank Sum Test	NSOI by TYMP	1	-600	872
Students t-Test	NSOI by UBA52	0.33	-654.7	243.4
Wilcox Rank Sum Test	NSOI by VAMP8	0.23	-142	104
Wilcox Rank Sum Test	NSOI by VCAN	0.69	-892	710
Students t-Test	NSOI by VEGFA	0.5	-204.3	389
Students t-Test	NSOI by VEGFB	0.5	-105.4	198
Students t-Test	NSOI by VEZF1	0.51	-30.7	55
Students t-Test	NSOI by VIM	0.56	-11099.5	6521.5
Students t-Test	NSOI by WARS	0.8	-183.7	146.7
Students t-Test	NSOI by WWTR1	0.43	-194.5	419.5
Students t-Test	NSOI by ZCCHC24	0.46	-70.3	144.3
Wilcox Rank Sum Test	NSOI by ZEB1	0.81	-44	62
Students t-Test	NSOI by ZFYVE16	0.94	-79.4	74.1
Students t-Test	NSOI by APP	0.32	-282.5	770.2
Wilcox Rank Sum Test	NSOI by C1QA	0.82	-1107	817
Wilcox Rank Sum Test	NSOI by C1QB	0.7	-3939	534
Students t-Test	NSOI by C1R	0.74	-894	1212.3
Wilcox Rank Sum Test	NSOI by C2	0.94	-637	213
Wilcox Rank Sum Test	NSOI by C4A/B	0.82	-2145	184
Students t-Test	NSOI by C6	0.27	-43.9	141.6
Wilcox Rank Sum Test	NSOI by CCL2	0.48	-116	1013
Wilcox Rank Sum Test	NSOI by CD14	0.94	-2111	572
Students t-Test	NSOI by CD276	0.28	-151.8	474.5
Wilcox Rank Sum Test	NSOI by CD4	0.26	-531	138
Students t-Test	NSOI by CD59	0.66	-936.6	1389.3
Wilcox Rank Sum Test	NSOI by CD81	1	-523	1003
Wilcox Rank Sum Test	NSOI by CD9	0.23	-60	534
Students t-Test	NSOI by CD99	0.66	-1630.1	2468.4
Wilcox Rank Sum Test	NSOI by CEBPB	0.18	-94	712
Students t-Test	NSOI by CFB	0.65	-363.9	558.6
Students t-Test	NSOI by CFH	0.4	-359.5	828.2
Students t-Test	NSOI by CFI	0.83	-113	138
Wilcox Rank Sum Test	NSOI by CTSC	0.7	-1075	710
Students t-Test	NSOI by CXCL1	0.19	-41	178.7
Wilcox Rank Sum Test	NSOI by CXCL2	0.24	-44	479
Students t-Test	NSOI by FCER1G	0.74	-529.9	391.9
Wilcox Rank Sum Test	NSOI by FCGR2A	0.94	-785	523
Students t-Test	NSOI by FCGR2A/C	0.85	-685.1	577.1
Students t-Test	NSOI by FCGR3A/B	0.52	-341	185.7
Students t-Test	NSOI by FCGRT	0.75	-990.2	743.5
Wilcox Rank Sum Test	NSOI by HLA-DRB1	0.82	-411	1473
Wilcox Rank Sum Test	NSOI by IL13RA1	0.7	-408	488
Students t-Test	NSOI by IL32	0.24	-75623.9	254774.6
Wilcox Rank Sum Test	NSOI by IRF4	0.093	-854	62
Students t-Test	NSOI by LGALS3	0.28	-174.3	530.3
Students t-Test	NSOI by LTBR	0.16	-49.8	261.2
Wilcox Rank Sum Test	NSOI by NOTCH2	0.7	-530	699
Wilcox Rank Sum Test	NSOI by PRDM1	0.31	-660	94
Students t-Test	NSOI by PSMD7	0.69	-209.8	301.8
Students t-Test	NSOI by PTGER4	0.078	-19.5	286.9
Wilcox Rank Sum Test	NSOI by S100A8	0.94	-643	533
Wilcox Rank Sum Test	NSOI by S100A9	1	-1589	968
Wilcox Rank Sum Test	NSOI by SLAMF7	0.82	-260	75
Students t-Test	NSOI by SOCS3	0.3	-364.1	1047.1
Wilcox Rank Sum Test	NSOI by TLR2	1	-415	373
Students t-Test	NSOI by TNFRSF17	0.14	-285.2	51.2
Wilcox Rank Sum Test	NSOI by XBP1	0.82	-6259	2173
