# Supplementary material for: Evaluation of Orbital Lymphoproliferative and Inflammatory Disorders by Gene Expression Analysis
Source: Int J Mol Sci. 2022 Aug 3;23(15):8609. doi: 10.3390/ijms23158609 (PMC9369106; doi:10.3390/ijms23158609)
Supplement: Supplementary file 1 [file ijms-23-08609-s001.zip › Table S3.csv]

Test	Gene	p-Value	lower CI	higher CI
Students t-Test	Lymphom by AAMP	0.0023	-246.3	-72.6
Students t-Test	Lymphom by ABI3BP	0.023	-531.9	-50.1
Students t-Test	Lymphom by ACVR1	0.017	-134.5	-19.3
Students t-Test	Lymphom by ACVRL1	0.005	-205	-47.9
Students t-Test	Lymphom by ADAM15	0.0014	-713.7	-240.8
Students t-Test	Lymphom by ADAM17	0.083	-158.5	11.8
Students t-Test	Lymphom by ADAM9	0.003	-268.6	-77.2
Wilcox Rank Sum Test	Lymphom by ADAMTS1	0.1	-802	19
Wilcox Rank Sum Test	Lymphom by ADAP1	0.0091	-169	-11
Students t-Test	Lymphom by AEBP1	0.0017	-2076.8	-679.2
Students t-Test	Lymphom by AGGF1	0.0021	-117.8	-37.1
Wilcox Rank Sum Test	Lymphom by AGRN	0.016	-549	-97
Students t-Test	Lymphom by AHNAK	0.013	-842.4	-128.9
Wilcox Rank Sum Test	Lymphom by AKAP12	0.12	-271	7
Students t-Test	Lymphom by AKT1	0.0079	-644	-126
Students t-Test	Lymphom by AKT2	0.062	-222.5	7.2
Students t-Test	Lymphom by ALDOA	0.00095	-1802.2	-629.4
Students t-Test	Lymphom by ANG	0.029	-88.3	-6.4
Students t-Test	Lymphom by ANGPT1	0.043	-59.8	-1.1
Wilcox Rank Sum Test	Lymphom by ANGPTL2	0.0091	-872	-46
Students t-Test	Lymphom by ANPEP	0.0017	-394.4	-131.2
Students t-Test	Lymphom by ANXA2P2	0.00097	-3622.5	-1305
Students t-Test	Lymphom by APOD	0.099	-1320.6	142.4
Wilcox Rank Sum Test	Lymphom by APOE	0.21	-4033	343
Students t-Test	Lymphom by AQP1	4.00E-04	-186.5	-79.7
Students t-Test	Lymphom by ATPIF1	0.76	-86.5	110.2
Wilcox Rank Sum Test	Lymphom by BGN	0.0091	-5146	-71
Students t-Test	Lymphom by BMPR1A	0.0012	-144	-48.2
Students t-Test	Lymphom by C1S	0.0019	-996.2	-303.3
Students t-Test	Lymphom by C3	0.032	-1060	-66.2
Wilcox Rank Sum Test	Lymphom by C3AR1	0.018	-967	-11
Students t-Test	Lymphom by CALCRL	0.0033	-210.5	-59.2
Students t-Test	Lymphom by CALD1	0.003	-605.1	-164.4
Students t-Test	Lymphom by CAV1	0.0017	-212.9	-67.8
Students t-Test	Lymphom by CCDC80	0.0013	-2007.2	-684.6
Wilcox Rank Sum Test	Lymphom by CCL5	0.48	-316	49
Students t-Test	Lymphom by CCR2	0.36	-156.3	73.8
Wilcox Rank Sum Test	Lymphom by CD163	0.064	-2018	134
Students t-Test	Lymphom by CD34	0.0028	-312.1	-90.5
Wilcox Rank Sum Test	Lymphom by CD36	0.0091	-703	-52
Students t-Test	Lymphom by CD44	0.0048	-3029.2	-723
Wilcox Rank Sum Test	Lymphom by CD46	0.6	-661	126
Students t-Test	Lymphom by CDC42	0.34	-206.5	82.7
Students t-Test	Lymphom by CDH11	0.0039	-800.9	-214.7
Students t-Test	Lymphom by CDKN1A	0.0044	-172.7	-43
Wilcox Rank Sum Test	Lymphom by CHI3L1	0.064	-1074	19
Wilcox Rank Sum Test	Lymphom by CHP1	0.0091	-403	-71
Wilcox Rank Sum Test	Lymphom by CHRDL1	0.064	-484	2
Wilcox Rank Sum Test	Lymphom by CLDN7	0.0091	-269	-16
Students t-Test	Lymphom by CLEC2B	0.012	-474.6	-76.1
Wilcox Rank Sum Test	Lymphom by CLEC3B	0.15	-370	21
Students t-Test	Lymphom by CLIC4	0.00011	-515.6	-251.1
Students t-Test	Lymphom by COL18A1	0.0019	-502.2	-159.3
Wilcox Rank Sum Test	Lymphom by COL1A1	0.0091	-133601	-307
Wilcox Rank Sum Test	Lymphom by COL1A2	0.018	-22427	-104
Wilcox Rank Sum Test	Lymphom by COL3A1	0.0091	-99468	-592
Wilcox Rank Sum Test	Lymphom by COL4A1	0.0091	-4470	-128
Wilcox Rank Sum Test	Lymphom by COL4A2	0.0091	-1609	-89
Wilcox Rank Sum Test	Lymphom by COL5A1	0.0091	-4967	-109
Wilcox Rank Sum Test	Lymphom by COL5A2	0.0091	-3807	-56
Students t-Test	Lymphom by COL6A1	0.0025	-1096.4	-321.4
Students t-Test	Lymphom by COL6A2	0.0019	-3475.5	-1116.1
Students t-Test	Lymphom by COL6A3	0.0036	-3145	-864.4
Wilcox Rank Sum Test	Lymphom by COMP	0.018	-1538	-12
Students t-Test	Lymphom by CRIP2	0.0016	-421.3	-138
Wilcox Rank Sum Test	Lymphom by CRISPLD2	0.0091	-550	-43
Wilcox Rank Sum Test	Lymphom by CSPG4	0.016	-191	-14
Students t-Test	Lymphom by CTNNB1	0.0062	-518.8	-118.3
Students t-Test	Lymphom by CTNND1	0.003	-523.2	-148.3
Students t-Test	Lymphom by CTSK	0.0051	-1393	-343.5
Wilcox Rank Sum Test	Lymphom by CTSL	0.064	-554	3
Students t-Test	Lymphom by CUL1	0.071	-121.8	6.2
Students t-Test	Lymphom by CXCL12	0.004	-449.8	-115.5
Students t-Test	Lymphom by CYB561	0.0014	-268.1	-91.4
Wilcox Rank Sum Test	Lymphom by CYBB	0.73	-1606	306
Students t-Test	Lymphom by CYP1B1	0.017	-346	-42.4
Students t-Test	Lymphom by DAG1	0.0042	-66.3	-16.4
Students t-Test	Lymphom by DCN	0.0044	-4282.7	-1092.2
Students t-Test	Lymphom by DDR2	0.0088	-236.9	-44.6
Wilcox Rank Sum Test	Lymphom by DENND5A	0.052	-152	0
Students t-Test	Lymphom by DESI1	0.21	-60.1	16.8
Students t-Test	Lymphom by DICER1	0.0072	-244.3	-49.7
Wilcox Rank Sum Test	Lymphom by DLG1	0.48	-93	30
Wilcox Rank Sum Test	Lymphom by DPT	0.0091	-528	-56
Students t-Test	Lymphom by DPYSL3	0.0012	-658.4	-232
Wilcox Rank Sum Test	Lymphom by DSC2	0.036	-302	-11
Students t-Test	Lymphom by DST	0.00032	-408.5	-171.9
Students t-Test	Lymphom by ECM2	0.003	-91.5	-25.4
Wilcox Rank Sum Test	Lymphom by ECSCR	0.14	-149	13
Wilcox Rank Sum Test	Lymphom by EGFL7	0.0091	-396	-39
Students t-Test	Lymphom by EGFR	0.0061	-150.5	-32.6
Students t-Test	Lymphom by EGLN2	0.37	-120.9	51.4
Wilcox Rank Sum Test	Lymphom by EGLN3	0.35	-249	29
Students t-Test	Lymphom by EIF2AK3	0.19	-187.2	45.9
Students t-Test	Lymphom by EIF4E2	0.0043	-273.1	-70.7
Students t-Test	Lymphom by EIF4EBP1	0.0035	-150.8	-40.5
Students t-Test	Lymphom by EMILIN1	0.0049	-1225	-305.4
Students t-Test	Lymphom by EMP3	0.016	-382.5	-50.6
Wilcox Rank Sum Test	Lymphom by ENO1	0.018	-704	-37
Students t-Test	Lymphom by ENO2	0.86	-85.2	74
Wilcox Rank Sum Test	Lymphom by ENPP2	0.48	-565	137
Students t-Test	Lymphom by EPAS1	0.011	-298.9	-49.3
Students t-Test	Lymphom by EPHB3	0.004	-106.6	-27.4
Students t-Test	Lymphom by EPHB4	0.00066	-169.5	-66.9
Wilcox Rank Sum Test	Lymphom by ERBB2	0.042	-189	-5
Students t-Test	Lymphom by EVI2A	0.98	-133	130.8
Students t-Test	Lymphom by F3	0.032	-605.8	-34.2
Students t-Test	Lymphom by FAP	0.0015	-195.1	-64.7
Wilcox Rank Sum Test	Lymphom by FBLN1	0.0091	-3939	-292
Students t-Test	Lymphom by FBLN5	0.16	-130.8	29.5
Wilcox Rank Sum Test	Lymphom by FBN1	0.018	-1412	-23
Students t-Test	Lymphom by FERMT2	0.0015	-165.3	-53.6
Students t-Test	Lymphom by FGFR1	0.0011	-206.2	-70.2
Wilcox Rank Sum Test	Lymphom by FHL1	0.1	-1682	37
Wilcox Rank Sum Test	Lymphom by FLT1	0.0091	-147	-10
Students t-Test	Lymphom by FMOD	0.0047	-667.1	-166.7
Wilcox Rank Sum Test	Lymphom by FN1	0.018	-7487	-68
Students t-Test	Lymphom by FOXO4	0.0033	-116.2	-30.9
Students t-Test	Lymphom by FSTL1	0.0023	-2379.2	-708.1
Students t-Test	Lymphom by GIMAP4	0.54	-277.9	160.8
Students t-Test	Lymphom by GPI	0.027	-184.9	-14
Students t-Test	Lymphom by GPR124	0.0071	-162.1	-34.6
Students t-Test	Lymphom by GPR56	0.0012	-185.1	-66.9
Students t-Test	Lymphom by GPX1	0.013	-693	-106.3
Wilcox Rank Sum Test	Lymphom by GSN	0.036	-3827	-104
Students t-Test	Lymphom by HDAC5	0.00079	-218.6	-84.7
Wilcox Rank Sum Test	Lymphom by HEG1	0.036	-482	-21
Students t-Test	Lymphom by HGF	0.0051	-138	-33.1
Students t-Test	Lymphom by HIPK1	0.48	-109.5	62.8
Students t-Test	Lymphom by HIPK2	0.5	-267.4	160.7
Wilcox Rank Sum Test	Lymphom by HK2	0.052	-270	0
Wilcox Rank Sum Test	Lymphom by HMOX1	0.73	-522	56
Students t-Test	Lymphom by HSD17B12	0.015	-166.3	-22.9
Students t-Test	Lymphom by HSP90B1	0.4	-878.7	484
Students t-Test	Lymphom by HSPB1	0.00021	-756.5	-334
Students t-Test	Lymphom by HSPG2	0.00075	-2702.8	-1036.8
Wilcox Rank Sum Test	Lymphom by ICAM1	0.064	-814	31
Wilcox Rank Sum Test	Lymphom by ID1	0.018	-466	-31
Students t-Test	Lymphom by ID4	0.0023	-235.7	-70.5
Students t-Test	Lymphom by IGF1	0.011	-349.7	-59.2
Students t-Test	Lymphom by IGFBP4	0.00087	-2204	-783.1
Students t-Test	Lymphom by IGFBP7	0.0052	-1670	-407.3
Wilcox Rank Sum Test	Lymphom by IL1B	0.6	-381	30
Students t-Test	Lymphom by ISLR	0.0035	-751.4	-209.3
Students t-Test	Lymphom by ITGA1	0.0042	-127.3	-31.4
Students t-Test	Lymphom by ITGA5	0.0086	-335	-62.8
Wilcox Rank Sum Test	Lymphom by ITGA6	0.1	-415	66
Students t-Test	Lymphom by ITGA7	0.0039	-190.9	-50.8
Wilcox Rank Sum Test	Lymphom by ITGAM	0.48	-674	45
Students t-Test	Lymphom by ITGB2	0.027	-902	-68.9
Wilcox Rank Sum Test	Lymphom by ITGB4	0.1	-494	11
Wilcox Rank Sum Test	Lymphom by ITM2A	1	-378	153
Students t-Test	Lymphom by JAG1	6.90E-05	-167.9	-83
Students t-Test	Lymphom by JAM2	0.0037	-161.6	-41.3
Students t-Test	Lymphom by JAM3	0.0071	-183.6	-41.5
Students t-Test	Lymphom by JUN	0.31	-372.7	135.1
Wilcox Rank Sum Test	Lymphom by KCNJ8	0.026	-164	-2
Wilcox Rank Sum Test	Lymphom by KDR	0.0091	-267	-14
Students t-Test	Lymphom by KIAA1462	0.0051	-149.5	-36.1
Students t-Test	Lymphom by LAMA4	0.0019	-789.6	-258
Students t-Test	Lymphom by LAMC1	0.003	-337.6	-93.7
Students t-Test	Lymphom by LDHA	0.0034	-958.1	-270.1
Students t-Test	Lymphom by LGALS1	0.0036	-2275.1	-607.4
Students t-Test	Lymphom by LHFP	0.0053	-153.5	-36.2
Wilcox Rank Sum Test	Lymphom by LOX	0.026	-917	-12
Students t-Test	Lymphom by LTBP4	0.0073	-473.4	-97.5
Wilcox Rank Sum Test	Lymphom by LUM	0.036	-7659	-14
Students t-Test	Lymphom by LY96	0.12	-199.2	27.6
Students t-Test	Lymphom by MAF	0.0048	-483.2	-120.2
Wilcox Rank Sum Test	Lymphom by MAP2K1	0.52	-121	28
Students t-Test	Lymphom by MAP2K2	0.0075	-506	-101.2
Wilcox Rank Sum Test	Lymphom by MAPK1	0.19	-9	94
Students t-Test	Lymphom by MAPK3	0.01	-186.1	-37.6
Students t-Test	Lymphom by MCAM	0.0051	-204.3	-50.6
Students t-Test	Lymphom by MEG3	0.00023	-319.5	-143.4
Students t-Test	Lymphom by MEOX2	0.012	-112.6	-18.9
Wilcox Rank Sum Test	Lymphom by MFAP4	0.21	-1143	29
Students t-Test	Lymphom by MGP	0.27	-3541.3	1319.9
Students t-Test	Lymphom by MMP14	0.0019	-576.2	-185.1
Wilcox Rank Sum Test	Lymphom by MMP2	0.0091	-1983	-83
Wilcox Rank Sum Test	Lymphom by MMP9	1	-1226	285
Students t-Test	Lymphom by MMRN2	0.0016	-284.4	-93.6
Wilcox Rank Sum Test	Lymphom by MPDZ	0.064	-188	11
Wilcox Rank Sum Test	Lymphom by MS4A4A	0.15	-1123	9
Students t-Test	Lymphom by MS4A6A	0.056	-169.2	2.6
Students t-Test	Lymphom by MTA1	0.12	-235.4	37
Students t-Test	Lymphom by MTDH	0.72	-250.3	192.5
Wilcox Rank Sum Test	Lymphom by MTOR	0.033	-136	-2
Students t-Test	Lymphom by MYC	0.072	-405	21.7
Wilcox Rank Sum Test	Lymphom by MYH11	0.35	-367	21
Students t-Test	Lymphom by MYLK	0.0019	-621.4	-200.3
Wilcox Rank Sum Test	Lymphom by MYO1D	0.28	-229	16
Wilcox Rank Sum Test	Lymphom by MYO5C	0.27	-159	16
Students t-Test	Lymphom by NCL	0.88	-148.9	165.6
Students t-Test	Lymphom by NDRG1	0.0036	-623.7	-161.4
Students t-Test	Lymphom by NF1	0.0044	-163.1	-40.5
Students t-Test	Lymphom by NID2	0.0019	-522.8	-170.1
Wilcox Rank Sum Test	Lymphom by NME1	0.27	-209	24
Students t-Test	Lymphom by NME4	0.21	-66.3	17.4
Wilcox Rank Sum Test	Lymphom by NOS3	0.036	-193	-2
Students t-Test	Lymphom by NPR1	0.0039	-88.4	-23.6
Students t-Test	Lymphom by NR3C1	0.4	-255	122.1
Wilcox Rank Sum Test	Lymphom by NR4A1	0.28	-801	57
Wilcox Rank Sum Test	Lymphom by NR4A3	0.21	-165	18
Students t-Test	Lymphom by NRP1	0.00026	-1242.7	-539.3
Students t-Test	Lymphom by NRP2	0.0061	-433.9	-100.1
Wilcox Rank Sum Test	Lymphom by OGN	0.0091	-1290	-60
Students t-Test	Lymphom by OLFML2B	0.0029	-341.9	-100.1
Wilcox Rank Sum Test	Lymphom by P3H1	0.0091	-278	-25
Students t-Test	Lymphom by PCOLCE	0.0029	-882.4	-257.6
Students t-Test	Lymphom by PDCL3	0.00052	-167.3	-69.6
Students t-Test	Lymphom by PDGFRB	0.0016	-468.1	-151.9
Wilcox Rank Sum Test	Lymphom by PDK1	0.73	-417	277
Wilcox Rank Sum Test	Lymphom by PDPN	0.078	-731	15
Wilcox Rank Sum Test	Lymphom by PECAM1	0.036	-2516	-110
Students t-Test	Lymphom by PGK1	0.011	-1437.6	-235.6
Students t-Test	Lymphom by PIK3R1	0.02	-391.3	-42.7
Students t-Test	Lymphom by PIK3R2	0.0023	-134	-40.2
Wilcox Rank Sum Test	Lymphom by PKM	0.064	-973	12
Wilcox Rank Sum Test	Lymphom by PKN1	0.28	-230	25
Wilcox Rank Sum Test	Lymphom by PLA2G2A	0.064	-2777	204
Wilcox Rank Sum Test	Lymphom by PLAU	0.018	-1780	-7
Wilcox Rank Sum Test	Lymphom by PLAUR	0.033	-182	-3
Students t-Test	Lymphom by PLCG1	0.85	-70.8	84.3
Students t-Test	Lymphom by PLXND1	0.002	-687.2	-214.4
Students t-Test	Lymphom by PMP22	0.0016	-223.3	-72.5
Wilcox Rank Sum Test	Lymphom by PNPLA6	0.21	-315	5
Wilcox Rank Sum Test	Lymphom by POSTN	0.0091	-2765	-14
Students t-Test	Lymphom by PPP2CB	0.001	-234	-84.2
Students t-Test	Lymphom by PPP2R1A	0.013	-317.6	-48
Students t-Test	Lymphom by PPP3R1	0.089	-367.1	34
Students t-Test	Lymphom by PRF1	0.0022	-97.5	-29.4
Students t-Test	Lymphom by PTEN	0.24	-280.1	79.9
Students t-Test	Lymphom by PTGIS	0.0024	-707.7	-217.2
Students t-Test	Lymphom by PTPRM	0.086	-142.7	11.2
Students t-Test	Lymphom by PTTG1	0.63	-58.2	36.9
Wilcox Rank Sum Test	Lymphom by PTX3	0.15	-1303	33
Wilcox Rank Sum Test	Lymphom by PXDN	0.052	-602	0
Students t-Test	Lymphom by QKI	0.0083	-575.9	-111.6
Students t-Test	Lymphom by RAC1	8.50E-05	-259.2	-127.7
Students t-Test	Lymphom by RAMP2	0.012	-138	-22.7
Wilcox Rank Sum Test	Lymphom by RBM47	0.16	-150	2
Students t-Test	Lymphom by RBPJ	0.012	-186.1	-30.5
Students t-Test	Lymphom by RBX1	0.0093	-338.7	-61.3
Students t-Test	Lymphom by RGCC	0.032	-673.3	-39.6
Students t-Test	Lymphom by RHOA	0.0056	-626.6	-143.8
Students t-Test	Lymphom by RNH1	0.0016	-348.8	-109.8
Students t-Test	Lymphom by ROCK1	0.096	-220.9	21.2
Students t-Test	Lymphom by ROCK2	0.001	-267	-92.1
Students t-Test	Lymphom by RPS27A	0.67	-2266	3215.1
Wilcox Rank Sum Test	Lymphom by RPS6KB2	0.21	-103	25
Students t-Test	Lymphom by RTN4	0.00022	-445.8	-196
Students t-Test	Lymphom by RUNX1	0.0051	-268.6	-65.9
Wilcox Rank Sum Test	Lymphom by RUNX1T1	0.036	-170	-1
Wilcox Rank Sum Test	Lymphom by SDC4	0.0091	-286	-20
Students t-Test	Lymphom by SERINC5	0.76	-77.4	96.9
Wilcox Rank Sum Test	Lymphom by SERPINA1	0.28	-468	22
Wilcox Rank Sum Test	Lymphom by SERPINE1	0.1	-1127	41
Students t-Test	Lymphom by SERPINF1	0.0067	-3373.8	-746.4
Students t-Test	Lymphom by SERPING1	0.0029	-1956.8	-567.2
Wilcox Rank Sum Test	Lymphom by SERPINH1	0.0091	-4191	-61
Students t-Test	Lymphom by SET	0.088	-151	12.8
Wilcox Rank Sum Test	Lymphom by SFRP2	0.036	-3533	-37
Students t-Test	Lymphom by SKP1	0.034	-859.7	-43.9
Students t-Test	Lymphom by SLC35A3	0.09	-73.3	6.2
Wilcox Rank Sum Test	Lymphom by SMAD1	0.0091	-201	-20
Students t-Test	Lymphom by SMAD2	0.21	-45.3	11.6
Students t-Test	Lymphom by SMAD3	0.77	-69.6	53.9
Students t-Test	Lymphom by SMAD4	0.024	-219.7	-19.2
Students t-Test	Lymphom by SMAD5	0.026	-117.4	-9.5
Students t-Test	Lymphom by SMC3	0.073	-75.2	4
Wilcox Rank Sum Test	Lymphom by SNAI1	0.033	-206	-5
Students t-Test	Lymphom by SNAI2	0.0061	-300.9	-68.6
Students t-Test	Lymphom by SNRPF	0.14	-116.1	19.9
Students t-Test	Lymphom by SORD	0.76	-41.9	31.5
Students t-Test	Lymphom by SP1	0.31	-68.2	24.6
Wilcox Rank Sum Test	Lymphom by SPARC	0.064	-24802	20
Wilcox Rank Sum Test	Lymphom by SPARCL1	0.036	-1717	-55
Students t-Test	Lymphom by SPHK2	0.028	-81.5	-6.1
Wilcox Rank Sum Test	Lymphom by SPINT1	0.16	-185	18
Wilcox Rank Sum Test	Lymphom by SRC	0.042	-120	-4
Wilcox Rank Sum Test	Lymphom by SRF	0.016	-277	-11
Wilcox Rank Sum Test	Lymphom by SRGN	0.48	-5303	962
Wilcox Rank Sum Test	Lymphom by SRPX2	0.036	-316	-9
Students t-Test	Lymphom by SSTR2	0.0017	-146.8	-47.2
Students t-Test	Lymphom by STAB1	0.0024	-297.3	-90.5
Students t-Test	Lymphom by STAT1	0.0021	-2003.1	-602.5
Students t-Test	Lymphom by STAT3	0.0025	-1161.3	-331.1
Students t-Test	Lymphom by SULF1	0.0022	-514	-161.3
Students t-Test	Lymphom by TCEB1	0.006	-311.2	-69.7
Students t-Test	Lymphom by TFDP1	0.0057	-117.6	-26.9
Wilcox Rank Sum Test	Lymphom by TGFB1	0.21	-610	143
Wilcox Rank Sum Test	Lymphom by TGFBI	0.0091	-2750	-40
Students t-Test	Lymphom by TGFBR2	0.19	-536.8	124.8
Wilcox Rank Sum Test	Lymphom by THBS1	0.018	-3498	-97
Wilcox Rank Sum Test	Lymphom by THBS2	0.018	-2272	-32
Wilcox Rank Sum Test	Lymphom by THY1	0.0091	-929	-75
Students t-Test	Lymphom by TIE1	0.0084	-187.4	-37.5
Wilcox Rank Sum Test	Lymphom by TIMP1	0.064	-9836	35
Students t-Test	Lymphom by TIMP2	0.0015	-1180.1	-403
Students t-Test	Lymphom by TLR4	0.0034	-254.2	-70
Wilcox Rank Sum Test	Lymphom by TMEM30B	0.0091	-212	-23
Wilcox Rank Sum Test	Lymphom by TNC	0.036	-1870	-23
Students t-Test	Lymphom by TNFRSF1A	0.001	-440.1	-155.4
Students t-Test	Lymphom by TNFSF10	0.0049	-406	-96
Students t-Test	Lymphom by TNFSF12	0.0075	-137.5	-27.4
Wilcox Rank Sum Test	Lymphom by TNFSF13	0.0091	-790	-76
Students t-Test	Lymphom by TNS1	5.50E-05	-394.8	-197.4
Students t-Test	Lymphom by TNXB	0.0012	-179.5	-62.1
Wilcox Rank Sum Test	Lymphom by TPM2	0.0091	-4313	-321
Wilcox Rank Sum Test	Lymphom by TPSB2	0.21	-880	85
Wilcox Rank Sum Test	Lymphom by TWIST1	0.0091	-224	-11
Students t-Test	Lymphom by TXNIP	0.9	-4635.5	4179.1
Wilcox Rank Sum Test	Lymphom by TYMP	0.21	-1140	53
Students t-Test	Lymphom by UBA52	0.85	-659.9	758.5
Wilcox Rank Sum Test	Lymphom by VAMP8	0.71	-224	38
Wilcox Rank Sum Test	Lymphom by VCAN	0.042	-1774	-17
Students t-Test	Lymphom by VEGFA	0.005	-437.7	-108.1
Students t-Test	Lymphom by VEGFB	0.017	-205.1	-26.5
Students t-Test	Lymphom by VEZF1	0.99	-27.1	27.3
Students t-Test	Lymphom by VIM	0.0082	-12344.4	-2396.5
Students t-Test	Lymphom by WARS	0.028	-277.9	-22.7
Students t-Test	Lymphom by WWTR1	0.0018	-481	-154.8
Students t-Test	Lymphom by ZCCHC24	0.0016	-178	-56.3
Wilcox Rank Sum Test	Lymphom by ZEB1	0.19	-137	4
Students t-Test	Lymphom by ZFYVE16	0.028	-99.1	-7.1
Students t-Test	Lymphom by APP	0.00012	-923.8	-426.6
Wilcox Rank Sum Test	Lymphom by C1QA	0.036	-2178	-8
Wilcox Rank Sum Test	Lymphom by C1QB	0.064	-5081	14
Students t-Test	Lymphom by C1R	0.0022	-1612.1	-483.7
Wilcox Rank Sum Test	Lymphom by C2	0.064	-854	21
Wilcox Rank Sum Test	Lymphom by C4A/B	0.28	-2329	72
Students t-Test	Lymphom by C6	0.33	-238.9	113.3
Wilcox Rank Sum Test	Lymphom by CCL2	0.018	-1223	-9
Wilcox Rank Sum Test	Lymphom by CD14	0.0091	-2984	-53
Students t-Test	Lymphom by CD276	0.00061	-537.3	-216.1
Wilcox Rank Sum Test	Lymphom by CD4	0.35	-639	87
Students t-Test	Lymphom by CD59	0.00031	-1844	-788.5
Wilcox Rank Sum Test	Lymphom by CD81	0.064	-1262	39
Wilcox Rank Sum Test	Lymphom by CD9	0.042	-690	-13
Students t-Test	Lymphom by CD99	0.001	-3406.7	-1180.6
Wilcox Rank Sum Test	Lymphom by CEBPB	0.0091	-1156	-73
Students t-Test	Lymphom by CFB	0.0076	-663.5	-136.5
Students t-Test	Lymphom by CFH	0.00035	-1017	-419
Students t-Test	Lymphom by CFI	0.0026	-190.9	-56
Wilcox Rank Sum Test	Lymphom by CTSC	0.15	-2505	84
Students t-Test	Lymphom by CXCL1	0.27	-238.2	92.2
Wilcox Rank Sum Test	Lymphom by CXCL2	0.15	-578	35
Students t-Test	Lymphom by FCER1G	0.0085	-649.7	-125.4
Wilcox Rank Sum Test	Lymphom by FCGR2A	0.036	-1461	-9
Students t-Test	Lymphom by FCGR2A/C	0.0087	-892.1	-174.1
Students t-Test	Lymphom by FCGR3A/B	0.0056	-382	-88.2
Students t-Test	Lymphom by FCGRT	0.0012	-1291.7	-448.7
Wilcox Rank Sum Test	Lymphom by HLA-DRB1	0.86	-1473	451
Wilcox Rank Sum Test	Lymphom by IL13RA1	0.15	-592	38
Students t-Test	Lymphom by IL32	0.01	-257124.3	-45121.1
Wilcox Rank Sum Test	Lymphom by IRF4	0.73	-951	202
Students t-Test	Lymphom by LGALS3	0.00024	-609.6	-265.9
Students t-Test	Lymphom by LTBR	0.001	-273	-100.8
Wilcox Rank Sum Test	Lymphom by NOTCH2	0.064	-765	42
Wilcox Rank Sum Test	Lymphom by PRDM1	0.6	-561	266
Students t-Test	Lymphom by PSMD7	0.00077	-434.6	-160.5
Students t-Test	Lymphom by PTGER4	0.02	-268.6	-30.5
Wilcox Rank Sum Test	Lymphom by S100A8	0.15	-713	13
Wilcox Rank Sum Test	Lymphom by S100A9	0.036	-1816	-22
Wilcox Rank Sum Test	Lymphom by SLAMF7	0.15	-324	28
Students t-Test	Lymphom by SOCS3	0.009	-1043.7	-193.9
Wilcox Rank Sum Test	Lymphom by TLR2	0.018	-511	-18
Students t-Test	Lymphom by TNFRSF17	0.51	-264	151.1
Wilcox Rank Sum Test	Lymphom by XBP1	0.064	-8182	566
