# Supplementary material for: Evaluation of Orbital Lymphoproliferative and Inflammatory Disorders by Gene Expression Analysis
Source: Int J Mol Sci. 2022 Aug 3;23(15):8609. doi: 10.3390/ijms23158609 (PMC9369106; doi:10.3390/ijms23158609)
Supplement: Supplementary file 1 [file ijms-23-08609-s001.zip › Table S4.csv]

Test	Gene	p-Value	lower CI	higher CI
Students t-Test	IgG4 by AAMP	0.036	17.6	316.9
Students t-Test	IgG4 by ABI3BP	0.81	-300.9	371.4
Students t-Test	IgG4 by ACVR1	0.13	-22.3	129.8
Students t-Test	IgG4 by ACVRL1	0.95	-92.1	97.8
Students t-Test	IgG4 by ADAM15	0.09	-119.8	1018.7
Students t-Test	IgG4 by ADAM17	0.0097	77	290.1
Students t-Test	IgG4 by ADAM9	4.00E-04	161	337.7
Wilcox Rank Sum Test	IgG4 by ADAMTS1	1	-650	392
Wilcox Rank Sum Test	IgG4 by ADAP1	0.1	-11	155
Students t-Test	IgG4 by AEBP1	0.31	-850.3	2168
Students t-Test	IgG4 by AGGF1	0.35	-54.6	123.7
Wilcox Rank Sum Test	IgG4 by AGRN	0.85	-96	549
Students t-Test	IgG4 by AHNAK	0.084	-145.7	1380.6
Wilcox Rank Sum Test	IgG4 by AKAP12	1	-193	83
Students t-Test	IgG4 by AKT1	0.12	-241.4	1176.3
Students t-Test	IgG4 by AKT2	0.23	-174.9	444.9
Students t-Test	IgG4 by ALDOA	0.22	-365.6	1388.3
Students t-Test	IgG4 by ANG	0.25	-94.1	31.5
Students t-Test	IgG4 by ANGPT1	0.99	-83.5	84
Wilcox Rank Sum Test	IgG4 by ANGPTL2	0.48	-320	795
Students t-Test	IgG4 by ANPEP	0.28	-245.1	589.8
Students t-Test	IgG4 by ANXA2P2	0.0015	1214.9	3774
Students t-Test	IgG4 by APOD	0.46	-924.8	1654.1
Wilcox Rank Sum Test	IgG4 by APOE	0.036	791	4491
Students t-Test	IgG4 by AQP1	0.42	-121.5	55.3
Students t-Test	IgG4 by ATPIF1	0.3	-75	175.2
Wilcox Rank Sum Test	IgG4 by BGN	0.1	-544	5146
Students t-Test	IgG4 by BMPR1A	0.88	-87	76.1
Students t-Test	IgG4 by C1S	0.12	-296.4	1499.1
Students t-Test	IgG4 by C3	0.099	-226.7	1552.9
Wilcox Rank Sum Test	IgG4 by C3AR1	0.018	13	986
Students t-Test	IgG4 by CALCRL	0.24	-159	401.2
Students t-Test	IgG4 by CALD1	0.74	-694.2	546.9
Students t-Test	IgG4 by CAV1	0.14	-82.7	346
Students t-Test	IgG4 by CCDC80	0.16	-614.4	2623
Wilcox Rank Sum Test	IgG4 by CCL5	0.21	-90	299
Students t-Test	IgG4 by CCR2	0.049	0.6	147.2
Wilcox Rank Sum Test	IgG4 by CD163	0.064	-136	2255
Students t-Test	IgG4 by CD34	0.82	-336.9	393.8
Wilcox Rank Sum Test	IgG4 by CD36	0.21	-95	703
Students t-Test	IgG4 by CD44	0.025	224.9	2719.7
Wilcox Rank Sum Test	IgG4 by CD46	0.48	-533	279
Students t-Test	IgG4 by CDC42	0.019	47.3	319.5
Students t-Test	IgG4 by CDH11	0.088	-136.8	1203.9
Students t-Test	IgG4 by CDKN1A	0.38	-100.5	210
Wilcox Rank Sum Test	IgG4 by CHI3L1	0.21	-584	924
Wilcox Rank Sum Test	IgG4 by CHP1	0.21	-214	189
Wilcox Rank Sum Test	IgG4 by CHRDL1	0.21	-62	507
Wilcox Rank Sum Test	IgG4 by CLDN7	0.6	-188	81
Students t-Test	IgG4 by CLEC2B	0.00054	206.1	537.4
Wilcox Rank Sum Test	IgG4 by CLEC3B	0.73	-185	191
Students t-Test	IgG4 by CLIC4	0.0013	167.7	479.8
Students t-Test	IgG4 by COL18A1	0.38	-421.7	809.9
Wilcox Rank Sum Test	IgG4 by COL1A1	0.21	-29928	133601
Wilcox Rank Sum Test	IgG4 by COL1A2	0.15	-2656	22469
Wilcox Rank Sum Test	IgG4 by COL3A1	0.15	-14746	99468
Wilcox Rank Sum Test	IgG4 by COL4A1	0.1	-800	4470
Wilcox Rank Sum Test	IgG4 by COL4A2	0.064	-267	1609
Wilcox Rank Sum Test	IgG4 by COL5A1	0.37	-786	4967
Wilcox Rank Sum Test	IgG4 by COL5A2	0.1	-382	3807
Students t-Test	IgG4 by COL6A1	0.64	-646.8	953.4
Students t-Test	IgG4 by COL6A2	0.099	-788.4	5395.9
Students t-Test	IgG4 by COL6A3	0.016	905.9	4675
Wilcox Rank Sum Test	IgG4 by COMP	0.21	-367	1544
Students t-Test	IgG4 by CRIP2	0.44	-343.9	609.4
Wilcox Rank Sum Test	IgG4 by CRISPLD2	0.37	-288	331
Wilcox Rank Sum Test	IgG4 by CSPG4	0.85	-95	101
Students t-Test	IgG4 by CTNNB1	0.47	-473.1	779.1
Students t-Test	IgG4 by CTNND1	0.16	-233.6	865.1
Students t-Test	IgG4 by CTSK	0.19	-348.8	1431
Wilcox Rank Sum Test	IgG4 by CTSL	0.064	-8	557
Students t-Test	IgG4 by CUL1	0.42	-109.8	199.6
Students t-Test	IgG4 by CXCL12	0.44	-416	729.7
Students t-Test	IgG4 by CYB561	0.39	-214.9	404.7
Wilcox Rank Sum Test	IgG4 by CYBB	0.28	-280	1907
Students t-Test	IgG4 by CYP1B1	0.078	-26.7	385.8
Students t-Test	IgG4 by DAG1	0.99	-128.2	127.3
Students t-Test	IgG4 by DCN	0.2	-2993.8	8478.4
Students t-Test	IgG4 by DDR2	0.66	-262.9	357.4
Wilcox Rank Sum Test	IgG4 by DENND5A	0.93	-89	64
Students t-Test	IgG4 by DESI1	0.84	-60.1	51.4
Students t-Test	IgG4 by DICER1	0.066	-21.7	387.3
Wilcox Rank Sum Test	IgG4 by DLG1	0.86	-63	119
Wilcox Rank Sum Test	IgG4 by DPT	0.37	-204	452
Students t-Test	IgG4 by DPYSL3	0.29	-473.6	1074.7
Wilcox Rank Sum Test	IgG4 by DSC2	0.28	-195	125
Students t-Test	IgG4 by DST	0.66	-356.5	486.3
Students t-Test	IgG4 by ECM2	0.83	-93.6	109.2
Wilcox Rank Sum Test	IgG4 by ECSCR	0.93	-66	138
Wilcox Rank Sum Test	IgG4 by EGFL7	0.37	-96	367
Students t-Test	IgG4 by EGFR	0.93	-150.7	160.5
Students t-Test	IgG4 by EGLN2	0.37	-168.1	308.3
Wilcox Rank Sum Test	IgG4 by EGLN3	0.46	-61	255
Students t-Test	IgG4 by EIF2AK3	0.068	-14.8	257.4
Students t-Test	IgG4 by EIF4E2	0.21	-164.3	481.8
Students t-Test	IgG4 by EIF4EBP1	0.16	-20.8	111.2
Students t-Test	IgG4 by EMILIN1	0.14	-475.2	2030.1
Students t-Test	IgG4 by EMP3	0.018	85.7	545.1
Wilcox Rank Sum Test	IgG4 by ENO1	0.018	32	722
Students t-Test	IgG4 by ENO2	0.051	-0.3	96.7
Wilcox Rank Sum Test	IgG4 by ENPP2	0.6	-227	674
Students t-Test	IgG4 by EPAS1	0.53	-274.3	431
Students t-Test	IgG4 by EPHB3	0.74	-185.7	226
Students t-Test	IgG4 by EPHB4	0.51	-221	336.6
Wilcox Rank Sum Test	IgG4 by ERBB2	0.71	-169	166
Students t-Test	IgG4 by EVI2A	0.13	-77.6	347.4
Students t-Test	IgG4 by F3	0.58	-328.7	528.7
Students t-Test	IgG4 by FAP	0.17	-69.9	269.7
Wilcox Rank Sum Test	IgG4 by FBLN1	0.15	-1306	3939
Students t-Test	IgG4 by FBLN5	0.65	-124.4	88
Wilcox Rank Sum Test	IgG4 by FBN1	0.036	71	1420
Students t-Test	IgG4 by FERMT2	0.2	-65.9	221.3
Students t-Test	IgG4 by FGFR1	0.13	-42.9	242.9
Wilcox Rank Sum Test	IgG4 by FHL1	0.73	-1405	314
Wilcox Rank Sum Test	IgG4 by FLT1	0.15	-98	53
Students t-Test	IgG4 by FMOD	0.49	-884.2	1382.9
Wilcox Rank Sum Test	IgG4 by FN1	0.036	374	7498
Students t-Test	IgG4 by FOXO4	0.19	-52.2	170.8
Students t-Test	IgG4 by FSTL1	0.23	-1508.8	4070.3
Students t-Test	IgG4 by GIMAP4	0.0061	126.6	460.3
Students t-Test	IgG4 by GPI	0.044	6.3	270.4
Students t-Test	IgG4 by GPR124	0.55	-227.4	333.8
Students t-Test	IgG4 by GPR56	0.66	-198.1	266.1
Students t-Test	IgG4 by GPX1	0.0029	220.7	798.6
Wilcox Rank Sum Test	IgG4 by GSN	0.21	-2090	1849
Students t-Test	IgG4 by HDAC5	0.042	9.6	300.4
Wilcox Rank Sum Test	IgG4 by HEG1	0.37	-166	483
Students t-Test	IgG4 by HGF	0.26	-99.2	241.8
Students t-Test	IgG4 by HIPK1	0.98	-60.5	61.8
Students t-Test	IgG4 by HIPK2	0.32	-103.7	245
Wilcox Rank Sum Test	IgG4 by HK2	0.35	-77	294
Wilcox Rank Sum Test	IgG4 by HMOX1	0.064	-8	556
Students t-Test	IgG4 by HSD17B12	0.28	-102	250.7
Students t-Test	IgG4 by HSP90B1	0.005	140	565.7
Students t-Test	IgG4 by HSPB1	0.16	-187.9	820.1
Students t-Test	IgG4 by HSPG2	0.23	-1623.7	4430.8
Wilcox Rank Sum Test	IgG4 by ICAM1	0.27	-522	292
Wilcox Rank Sum Test	IgG4 by ID1	0.86	-246	220
Students t-Test	IgG4 by ID4	0.84	-207.4	240.7
Students t-Test	IgG4 by IGF1	0.26	-305.9	715.7
Students t-Test	IgG4 by IGFBP4	0.061	-74	2309.1
Students t-Test	IgG4 by IGFBP7	0.051	-6.7	1987.1
Wilcox Rank Sum Test	IgG4 by IL1B	0.73	-389	27
Students t-Test	IgG4 by ISLR	0.073	-106.9	1292
Students t-Test	IgG4 by ITGA1	0.59	-56.6	92.6
Students t-Test	IgG4 by ITGA5	0.087	-28.8	334.1
Wilcox Rank Sum Test	IgG4 by ITGA6	0.37	-72	566
Students t-Test	IgG4 by ITGA7	0.5	-161.6	87.8
Wilcox Rank Sum Test	IgG4 by ITGAM	0.21	-80	730
Students t-Test	IgG4 by ITGB2	0.051	-2.4	1249.3
Wilcox Rank Sum Test	IgG4 by ITGB4	1	-398	520
Wilcox Rank Sum Test	IgG4 by ITM2A	0.85	-402	191
Students t-Test	IgG4 by JAG1	0.37	-60.8	137.9
Students t-Test	IgG4 by JAM2	0.56	-135.6	208.3
Students t-Test	IgG4 by JAM3	0.17	-82.3	282.1
Students t-Test	IgG4 by JUN	0.82	-888.6	1014.6
Wilcox Rank Sum Test	IgG4 by KCNJ8	0.85	-122	44
Wilcox Rank Sum Test	IgG4 by KDR	0.48	-200	69
Students t-Test	IgG4 by KIAA1462	0.26	-119.8	288.9
Students t-Test	IgG4 by LAMA4	0.33	-601.9	1274.3
Students t-Test	IgG4 by LAMC1	0.26	-173.1	464.4
Students t-Test	IgG4 by LDHA	0.16	-128.8	663.3
Students t-Test	IgG4 by LGALS1	0.096	-617.4	4109.2
Students t-Test	IgG4 by LHFP	0.53	-91.9	155.4
Wilcox Rank Sum Test	IgG4 by LOX	0.052	0	926
Students t-Test	IgG4 by LTBP4	0.84	-262.6	314
Wilcox Rank Sum Test	IgG4 by LUM	0.15	-1191	6945
Students t-Test	IgG4 by LY96	0.079	-50.2	464.4
Students t-Test	IgG4 by MAF	0.071	-61.4	826
Wilcox Rank Sum Test	IgG4 by MAP2K1	0.58	-84	127
Students t-Test	IgG4 by MAP2K2	0.1	-113.4	780.9
Wilcox Rank Sum Test	IgG4 by MAPK1	0.46	-16	96
Students t-Test	IgG4 by MAPK3	0.2	-43.7	163.1
Students t-Test	IgG4 by MCAM	0.49	-141	244.3
Students t-Test	IgG4 by MEG3	0.33	-108.5	271.4
Students t-Test	IgG4 by MEOX2	0.32	-85.2	185.6
Wilcox Rank Sum Test	IgG4 by MFAP4	0.6	-518	1037
Students t-Test	IgG4 by MGP	0.39	-2491.9	4643.9
Students t-Test	IgG4 by MMP14	0.025	81.5	755.4
Wilcox Rank Sum Test	IgG4 by MMP2	0.37	-724	1481
Wilcox Rank Sum Test	IgG4 by MMP9	0.064	-30	1443
Students t-Test	IgG4 by MMRN2	0.49	-312.5	496.3
Wilcox Rank Sum Test	IgG4 by MPDZ	0.14	-88	193
Wilcox Rank Sum Test	IgG4 by MS4A4A	0.064	-13	1278
Students t-Test	IgG4 by MS4A6A	0.066	-19.1	324.5
Students t-Test	IgG4 by MTA1	0.082	-40.6	376.4
Students t-Test	IgG4 by MTDH	0.0096	55.5	264.5
Wilcox Rank Sum Test	IgG4 by MTOR	0.016	37	136
Students t-Test	IgG4 by MYC	0.69	-233.5	336.4
Wilcox Rank Sum Test	IgG4 by MYH11	0.78	-318	70
Students t-Test	IgG4 by MYLK	0.74	-818.3	1012.5
Wilcox Rank Sum Test	IgG4 by MYO1D	0.064	-5	233
Wilcox Rank Sum Test	IgG4 by MYO5C	1	-129	54
Students t-Test	IgG4 by NCL	1	-93.2	92.9
Students t-Test	IgG4 by NDRG1	0.14	-99.2	555.8
Students t-Test	IgG4 by NF1	0.17	-48.9	204.4
Students t-Test	IgG4 by NID2	0.058	-22.9	805.6
Wilcox Rank Sum Test	IgG4 by NME1	0.016	69	237
Students t-Test	IgG4 by NME4	0.017	-74.5	-9
Wilcox Rank Sum Test	IgG4 by NOS3	0.37	-108	87
Students t-Test	IgG4 by NPR1	0.31	-54.5	124.7
Students t-Test	IgG4 by NR3C1	0.38	-306.7	549.8
Wilcox Rank Sum Test	IgG4 by NR4A1	0.73	-668	182
Wilcox Rank Sum Test	IgG4 by NR4A3	0.15	-172	25
Students t-Test	IgG4 by NRP1	0.002	428.6	1324.5
Students t-Test	IgG4 by NRP2	0.097	-103.3	726.7
Wilcox Rank Sum Test	IgG4 by OGN	0.6	-562	1260
Students t-Test	IgG4 by OLFML2B	0.076	-58.2	605.5
Wilcox Rank Sum Test	IgG4 by P3H1	0.21	-72	271
Students t-Test	IgG4 by PCOLCE	0.21	-557.7	1603.5
Students t-Test	IgG4 by PDCL3	0.87	-85.8	73.8
Students t-Test	IgG4 by PDGFRB	0.66	-418.2	573.3
Wilcox Rank Sum Test	IgG4 by PDK1	0.036	1	711
Wilcox Rank Sum Test	IgG4 by PDPN	0.27	-281	508
Wilcox Rank Sum Test	IgG4 by PECAM1	0.018	262	2816
Students t-Test	IgG4 by PGK1	0.036	132.6	2262.7
Students t-Test	IgG4 by PIK3R1	0.18	-197.9	659
Students t-Test	IgG4 by PIK3R2	0.19	-47.8	173.1
Wilcox Rank Sum Test	IgG4 by PKM	0.064	-6	990
Wilcox Rank Sum Test	IgG4 by PKN1	0.036	6	255
Wilcox Rank Sum Test	IgG4 by PLA2G2A	0.46	-2428	585
Wilcox Rank Sum Test	IgG4 by PLAU	0.15	-1359	436
Wilcox Rank Sum Test	IgG4 by PLAUR	0.096	-94	185
Students t-Test	IgG4 by PLCG1	0.79	-244	286.9
Students t-Test	IgG4 by PLXND1	0.023	78.7	762.9
Students t-Test	IgG4 by PMP22	0.62	-83.6	133.6
Wilcox Rank Sum Test	IgG4 by PNPLA6	0.0091	122	330
Wilcox Rank Sum Test	IgG4 by POSTN	0.064	-227	2765
Students t-Test	IgG4 by PPP2CB	0.76	-119.7	156.1
Students t-Test	IgG4 by PPP2R1A	0.093	-70.1	525
Students t-Test	IgG4 by PPP3R1	0.018	39.8	314.2
Students t-Test	IgG4 by PRF1	0.15	-23	112.1
Students t-Test	IgG4 by PTEN	0.24	-191.8	535.6
Students t-Test	IgG4 by PTGIS	0.009	224.4	928
Students t-Test	IgG4 by PTPRM	0.98	-139	136.4
Students t-Test	IgG4 by PTTG1	0.16	-43.6	163.6
Wilcox Rank Sum Test	IgG4 by PTX3	0.28	-634	1369
Wilcox Rank Sum Test	IgG4 by PXDN	0.14	-89	603
Students t-Test	IgG4 by QKI	0.03	48.5	689.7
Students t-Test	IgG4 by RAC1	0.1	-20.5	192.7
Students t-Test	IgG4 by RAMP2	0.79	-67.8	86.7
Wilcox Rank Sum Test	IgG4 by RBM47	0.19	-84	79
Students t-Test	IgG4 by RBPJ	0.21	-65	218.1
Students t-Test	IgG4 by RBX1	0.0012	176.7	438.4
Students t-Test	IgG4 by RGCC	0.55	-269	469
Students t-Test	IgG4 by RHOA	0.0019	209.4	685
Students t-Test	IgG4 by RNH1	0.00078	158.7	400.4
Students t-Test	IgG4 by ROCK1	0.048	1.9	277.4
Students t-Test	IgG4 by ROCK2	0.052	-2.1	312.3
Students t-Test	IgG4 by RPS27A	0.11	-968.9	5712.7
Wilcox Rank Sum Test	IgG4 by RPS6KB2	0.37	-54	77
Students t-Test	IgG4 by RTN4	0.013	94.9	513.1
Students t-Test	IgG4 by RUNX1	0.18	-85	328.3
Wilcox Rank Sum Test	IgG4 by RUNX1T1	1	-111	65
Wilcox Rank Sum Test	IgG4 by SDC4	0.86	-261	87
Students t-Test	IgG4 by SERINC5	0.36	-25.4	62.7
Wilcox Rank Sum Test	IgG4 by SERPINA1	0.15	-177	464
Wilcox Rank Sum Test	IgG4 by SERPINE1	0.21	-838	493
Students t-Test	IgG4 by SERPINF1	0.088	-770	6075.5
Students t-Test	IgG4 by SERPING1	0.069	-243.9	3441.7
Wilcox Rank Sum Test	IgG4 by SERPINH1	0.1	-329	4191
Students t-Test	IgG4 by SET	0.37	-67	159
Wilcox Rank Sum Test	IgG4 by SFRP2	0.28	-813	3670
Students t-Test	IgG4 by SKP1	0.25	-336.4	995.5
Students t-Test	IgG4 by SLC35A3	0.41	-62	27.8
Wilcox Rank Sum Test	IgG4 by SMAD1	0.86	-152	169
Students t-Test	IgG4 by SMAD2	0.58	-119.8	83.4
Students t-Test	IgG4 by SMAD3	0.85	-168	188.7
Students t-Test	IgG4 by SMAD4	0.43	-340.6	558.6
Students t-Test	IgG4 by SMAD5	0.067	-14.3	227.8
Students t-Test	IgG4 by SMC3	0.26	-66.8	162.8
Wilcox Rank Sum Test	IgG4 by SNAI1	1	-111	95
Students t-Test	IgG4 by SNAI2	0.25	-275.8	650.2
Students t-Test	IgG4 by SNRPF	0.034	18.7	224.6
Students t-Test	IgG4 by SORD	0.79	-99.8	83.1
Students t-Test	IgG4 by SP1	0.15	-59.2	210.3
Wilcox Rank Sum Test	IgG4 by SPARC	0.15	-3000	24967
Wilcox Rank Sum Test	IgG4 by SPARCL1	0.28	-520	1756
Students t-Test	IgG4 by SPHK2	0.13	-24.4	127.9
Wilcox Rank Sum Test	IgG4 by SPINT1	0.52	-128	90
Wilcox Rank Sum Test	IgG4 by SRC	0.4	-63	69
Wilcox Rank Sum Test	IgG4 by SRF	0.31	-111	166
Wilcox Rank Sum Test	IgG4 by SRGN	0.1	-323	6232
Wilcox Rank Sum Test	IgG4 by SRPX2	0.28	-163	164
Students t-Test	IgG4 by SSTR2	0.78	-125.5	153.7
Students t-Test	IgG4 by STAB1	0.087	-18.9	229.4
Students t-Test	IgG4 by STAT1	0.33	-881.2	2090.8
Students t-Test	IgG4 by STAT3	0.26	-482.4	1346.4
Students t-Test	IgG4 by SULF1	0.085	-60.8	639.7
Students t-Test	IgG4 by TCEB1	0.0037	120.1	396.7
Students t-Test	IgG4 by TFDP1	0.12	-24.4	139.5
Wilcox Rank Sum Test	IgG4 by TGFB1	0.0091	124	707
Wilcox Rank Sum Test	IgG4 by TGFBI	0.036	113	2750
Students t-Test	IgG4 by TGFBR2	0.26	-514.8	1249.4
Wilcox Rank Sum Test	IgG4 by THBS1	0.21	-1576	2182
Wilcox Rank Sum Test	IgG4 by THBS2	0.21	-432	2292
Wilcox Rank Sum Test	IgG4 by THY1	0.21	-151	929
Students t-Test	IgG4 by TIE1	0.53	-138.1	225.2
Wilcox Rank Sum Test	IgG4 by TIMP1	0.036	563	10147
Students t-Test	IgG4 by TIMP2	0.14	-396.2	1750.9
Students t-Test	IgG4 by TLR4	0.00097	114	303.1
Wilcox Rank Sum Test	IgG4 by TMEM30B	0.86	-169	96
Wilcox Rank Sum Test	IgG4 by TNC	0.1	-82	1923
Students t-Test	IgG4 by TNFRSF1A	0.0026	137.2	467.3
Students t-Test	IgG4 by TNFSF10	0.11	-153	825.2
Students t-Test	IgG4 by TNFSF12	0.0052	40.6	161.6
Wilcox Rank Sum Test	IgG4 by TNFSF13	0.48	-446	344
Students t-Test	IgG4 by TNS1	0.17	-50	248.9
Students t-Test	IgG4 by TNXB	0.88	-147.1	130.4
Wilcox Rank Sum Test	IgG4 by TPM2	0.48	-3222	3682
Wilcox Rank Sum Test	IgG4 by TPSB2	0.48	-334	965
Wilcox Rank Sum Test	IgG4 by TWIST1	0.28	-73	188
Students t-Test	IgG4 by TXNIP	0.11	-2484.2	12673.1
Wilcox Rank Sum Test	IgG4 by TYMP	0.21	-512	1184
Students t-Test	IgG4 by UBA52	0.51	-801.6	1251.4
Wilcox Rank Sum Test	IgG4 by VAMP8	0.064	-20	262
Wilcox Rank Sum Test	IgG4 by VCAN	0.14	-284	1845
Students t-Test	IgG4 by VEGFA	0.11	-39.5	339
Students t-Test	IgG4 by VEGFB	0.33	-65.7	173.7
Students t-Test	IgG4 by VEZF1	0.22	-43.9	11.3
Students t-Test	IgG4 by VIM	0.075	-2138.4	22983.3
Students t-Test	IgG4 by WARS	0.063	-16.8	366.8
Students t-Test	IgG4 by WWTR1	0.44	-472.5	808.3
Students t-Test	IgG4 by ZCCHC24	0.27	-85.7	221.2
Wilcox Rank Sum Test	IgG4 by ZEB1	0.35	-51	141
Students t-Test	IgG4 by ZFYVE16	0.07	-6.1	119.4
Students t-Test	IgG4 by APP	0.23	-355.3	1055.5
Wilcox Rank Sum Test	IgG4 by C1QA	0.1	-184	2258
Wilcox Rank Sum Test	IgG4 by C1QB	0.0091	1020	5306
Students t-Test	IgG4 by C1R	0.2	-751.9	2423.3
Wilcox Rank Sum Test	IgG4 by C2	0.036	12	866
Wilcox Rank Sum Test	IgG4 by C4A/B	0.15	-72	2488
Students t-Test	IgG4 by C6	0.95	-95.2	90.5
Wilcox Rank Sum Test	IgG4 by CCL2	0.21	-875	389
Wilcox Rank Sum Test	IgG4 by CD14	0.018	159	2984
Students t-Test	IgG4 by CD276	0.13	-58	381.1
Wilcox Rank Sum Test	IgG4 by CD4	0.021	42	728
Students t-Test	IgG4 by CD59	0.14	-619.8	2648.7
Wilcox Rank Sum Test	IgG4 by CD81	0.064	-3	1361
Wilcox Rank Sum Test	IgG4 by CD9	0.58	-509	181
Students t-Test	IgG4 by CD99	0.025	281.2	3188.4
Wilcox Rank Sum Test	IgG4 by CEBPB	0.48	-712	444
Students t-Test	IgG4 by CFB	0.42	-721.8	1262.2
Students t-Test	IgG4 by CFH	0.077	-53.9	865
Students t-Test	IgG4 by CFI	0.099	-31	244.5
Wilcox Rank Sum Test	IgG4 by CTSC	0.036	82	2589
Students t-Test	IgG4 by CXCL1	0.63	-103.3	65.8
Wilcox Rank Sum Test	IgG4 by CXCL2	1	-475	118
Students t-Test	IgG4 by FCER1G	0.12	-226.5	1185.6
Wilcox Rank Sum Test	IgG4 by FCGR2A	0.064	-71	1474
Students t-Test	IgG4 by FCGR2A/C	0.13	-309.1	1519.3
Students t-Test	IgG4 by FCGR3A/B	0.002	180.8	496.6
Students t-Test	IgG4 by FCGRT	0.015	331.5	1737.9
Wilcox Rank Sum Test	IgG4 by HLA-DRB1	1	-1490	532
Wilcox Rank Sum Test	IgG4 by IL13RA1	0.37	-169	534
Students t-Test	IgG4 by IL32	0.55	-82920.4	146298.2
Wilcox Rank Sum Test	IgG4 by IRF4	0.0091	416	1153
Students t-Test	IgG4 by LGALS3	0.35	-355.9	756.7
Students t-Test	IgG4 by LTBR	0.53	-124.8	216.8
Wilcox Rank Sum Test	IgG4 by NOTCH2	0.21	-179	698
Wilcox Rank Sum Test	IgG4 by PRDM1	0.064	-73	845
Students t-Test	IgG4 by PSMD7	0.0049	89.9	382.5
Students t-Test	IgG4 by PTGER4	0.64	-162.5	105.2
Wilcox Rank Sum Test	IgG4 by S100A8	0.1	-11	722
Wilcox Rank Sum Test	IgG4 by S100A9	0.036	171	1818
Wilcox Rank Sum Test	IgG4 by SLAMF7	0.064	-20	362
Students t-Test	IgG4 by SOCS3	0.55	-435.5	762.4
Wilcox Rank Sum Test	IgG4 by TLR2	0.018	61	511
Students t-Test	IgG4 by TNFRSF17	0.11	-99.5	524.4
Wilcox Rank Sum Test	IgG4 by XBP1	0.018	921	9420
